# Supplementary material for: Evolution of gene regulation in ruminants differs between evolutionary breakpoint regions and homologous synteny blocks
Source: PubMed Central journal article supplement — Genome Res. 2019 Apr;29(4):576–89. doi: 10.1101/gr.239863.118 (PMC6442394; doi:10.1101/gr.239863.118), 2019-04

**Supplemental Figure 6. Comparative organization of the reconstructed cetartiodactyl and pecoran ancestral chromosomes with the cattle genome as a reference.** Order and orientation of syntenic fragments are visualized using the Evolution Highway comparative chromosome browser. Blue and pink colors represent orientation of blocks relative to the reference, with blue indicating the same orientation, and pink indicating the opposite orientation. Pink does not always indicate an inversion because the orientation of RACFs is randomly chosen during the reconstruction. The number within each block represents a chromosome number for a reconstructed ancestor, and a lower-case letter indicates a fragment of the chromosome. Light grey blocks indicate mammalian multispecies homologous synteny blocks (msHSBs). Diamonds indicate the position of EBRs, with light and dark green showing EBRs classified as ruminant or pecoran, respectively, using FISH data. Heatmaps show the density of ruminant, cetartiodactyl, and mammalian enhancers, and ruminant gene family expansions in windows of 100 Kbp along cattle chromosomes.

# Cattle chr1

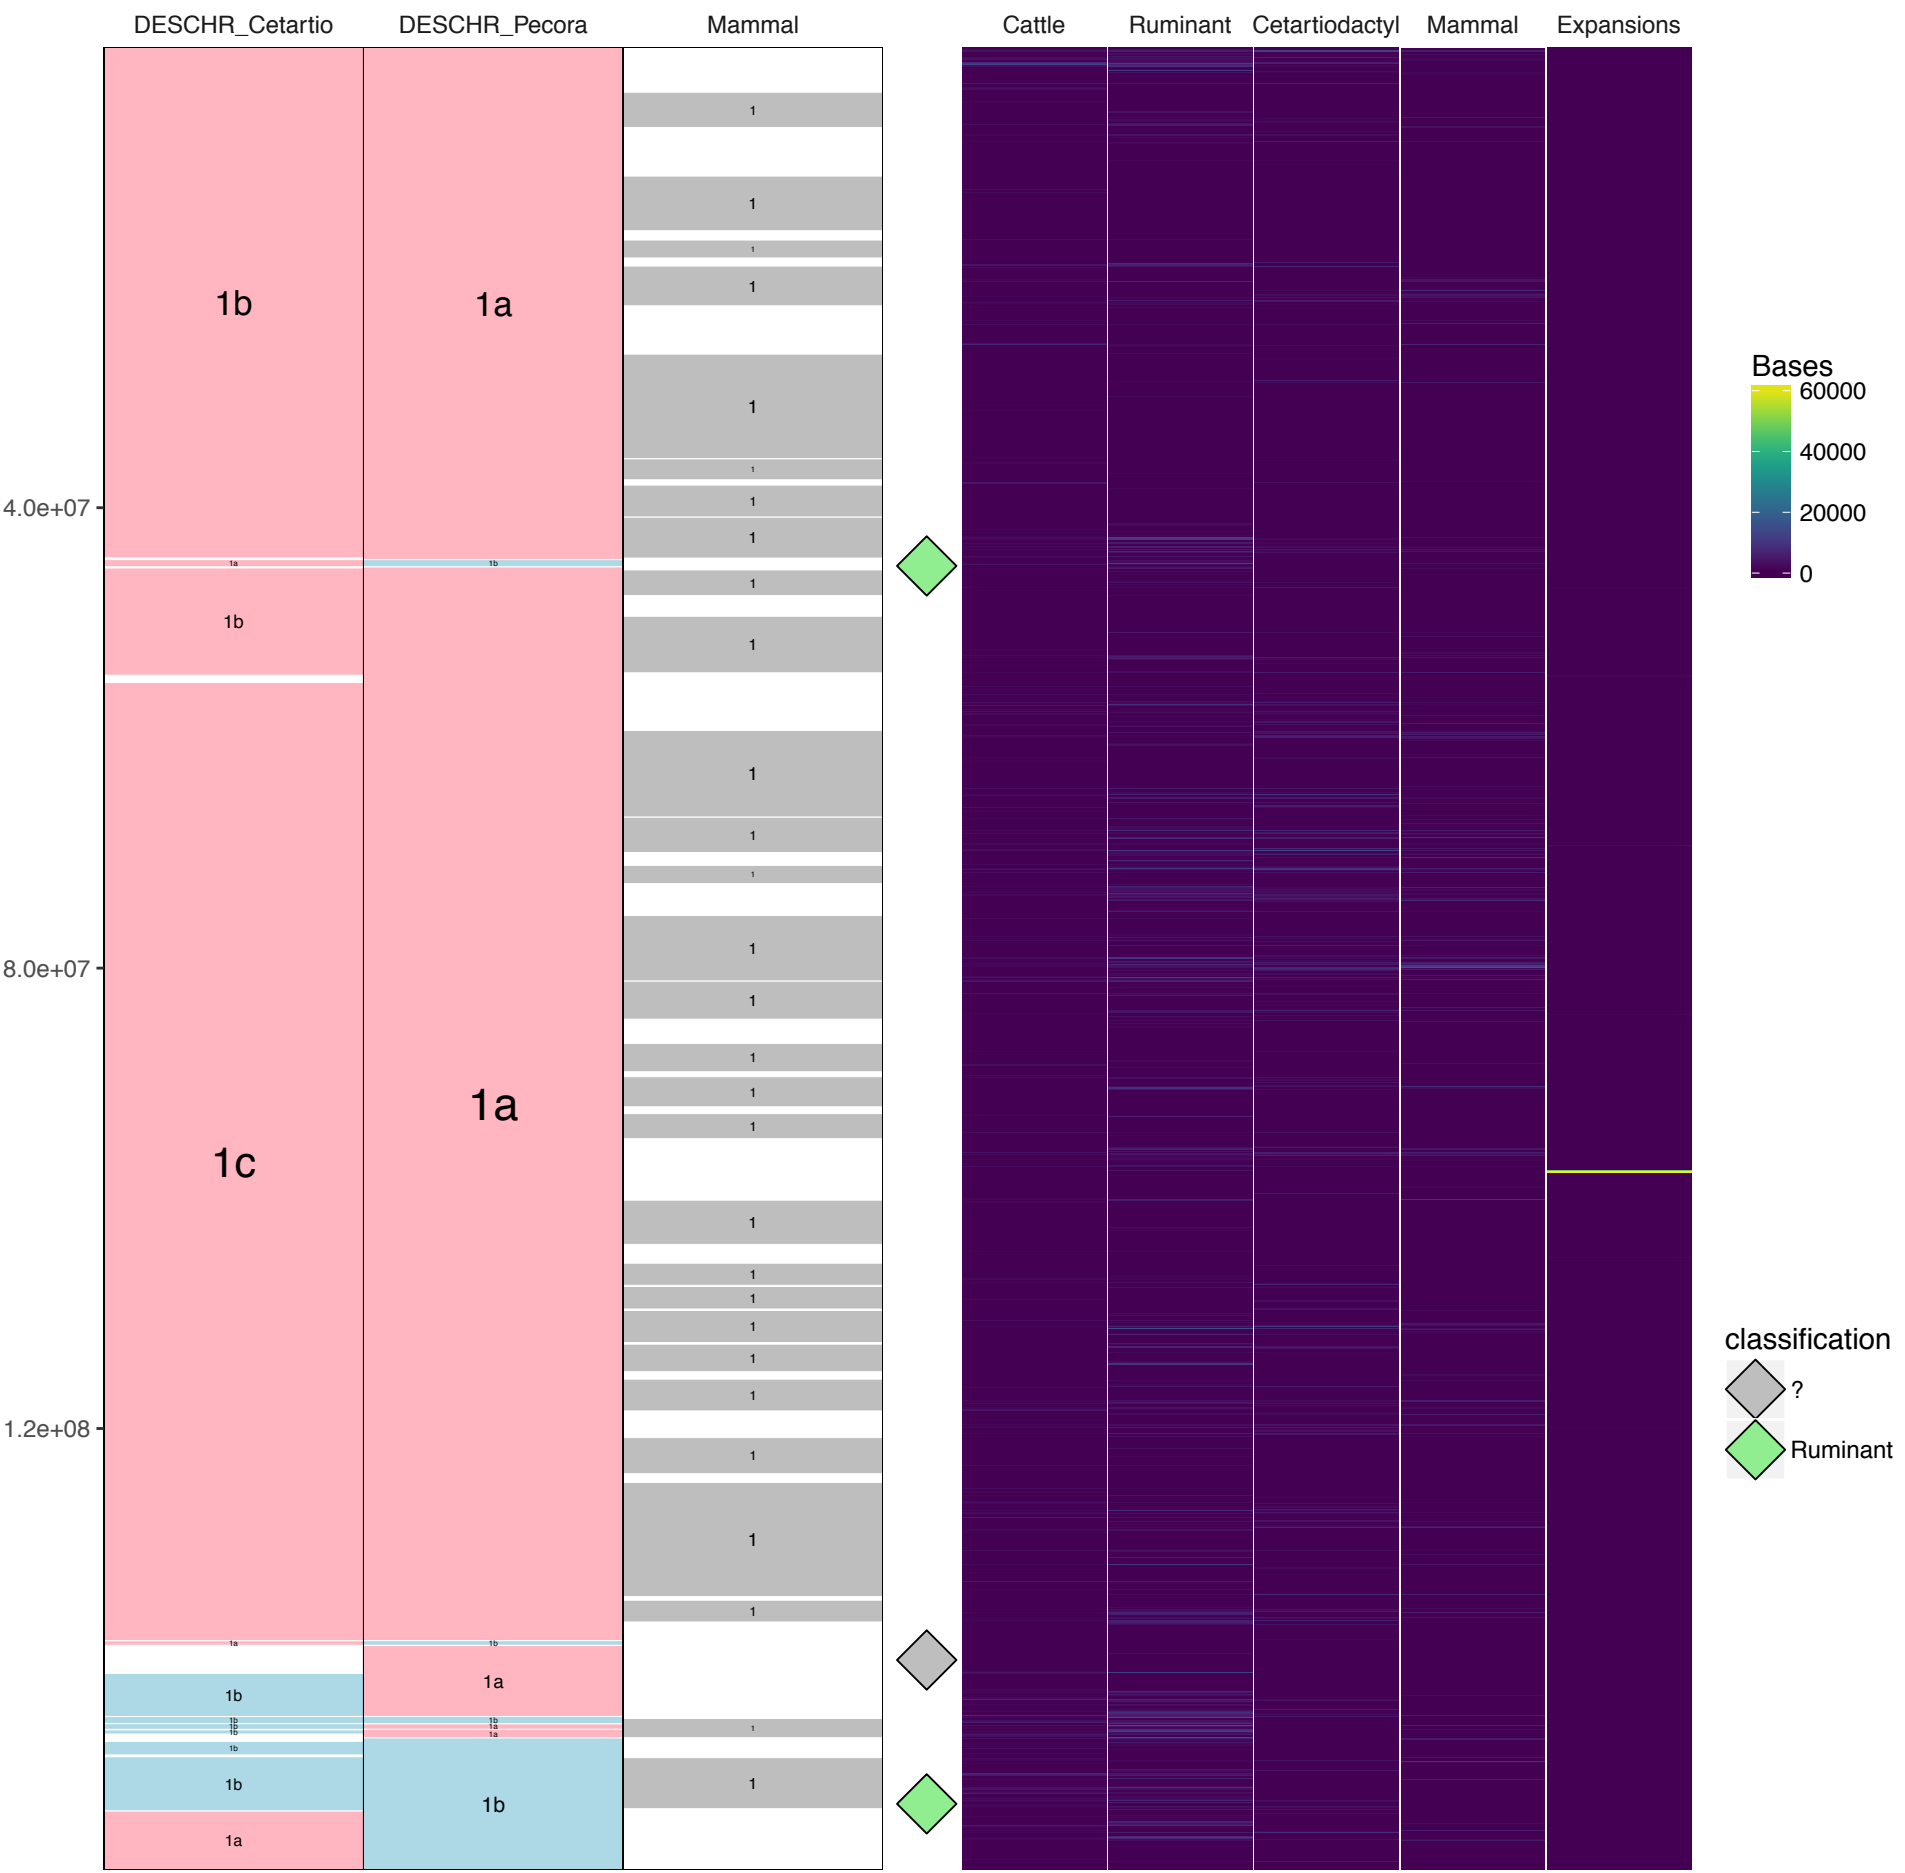

# Cattle chr2

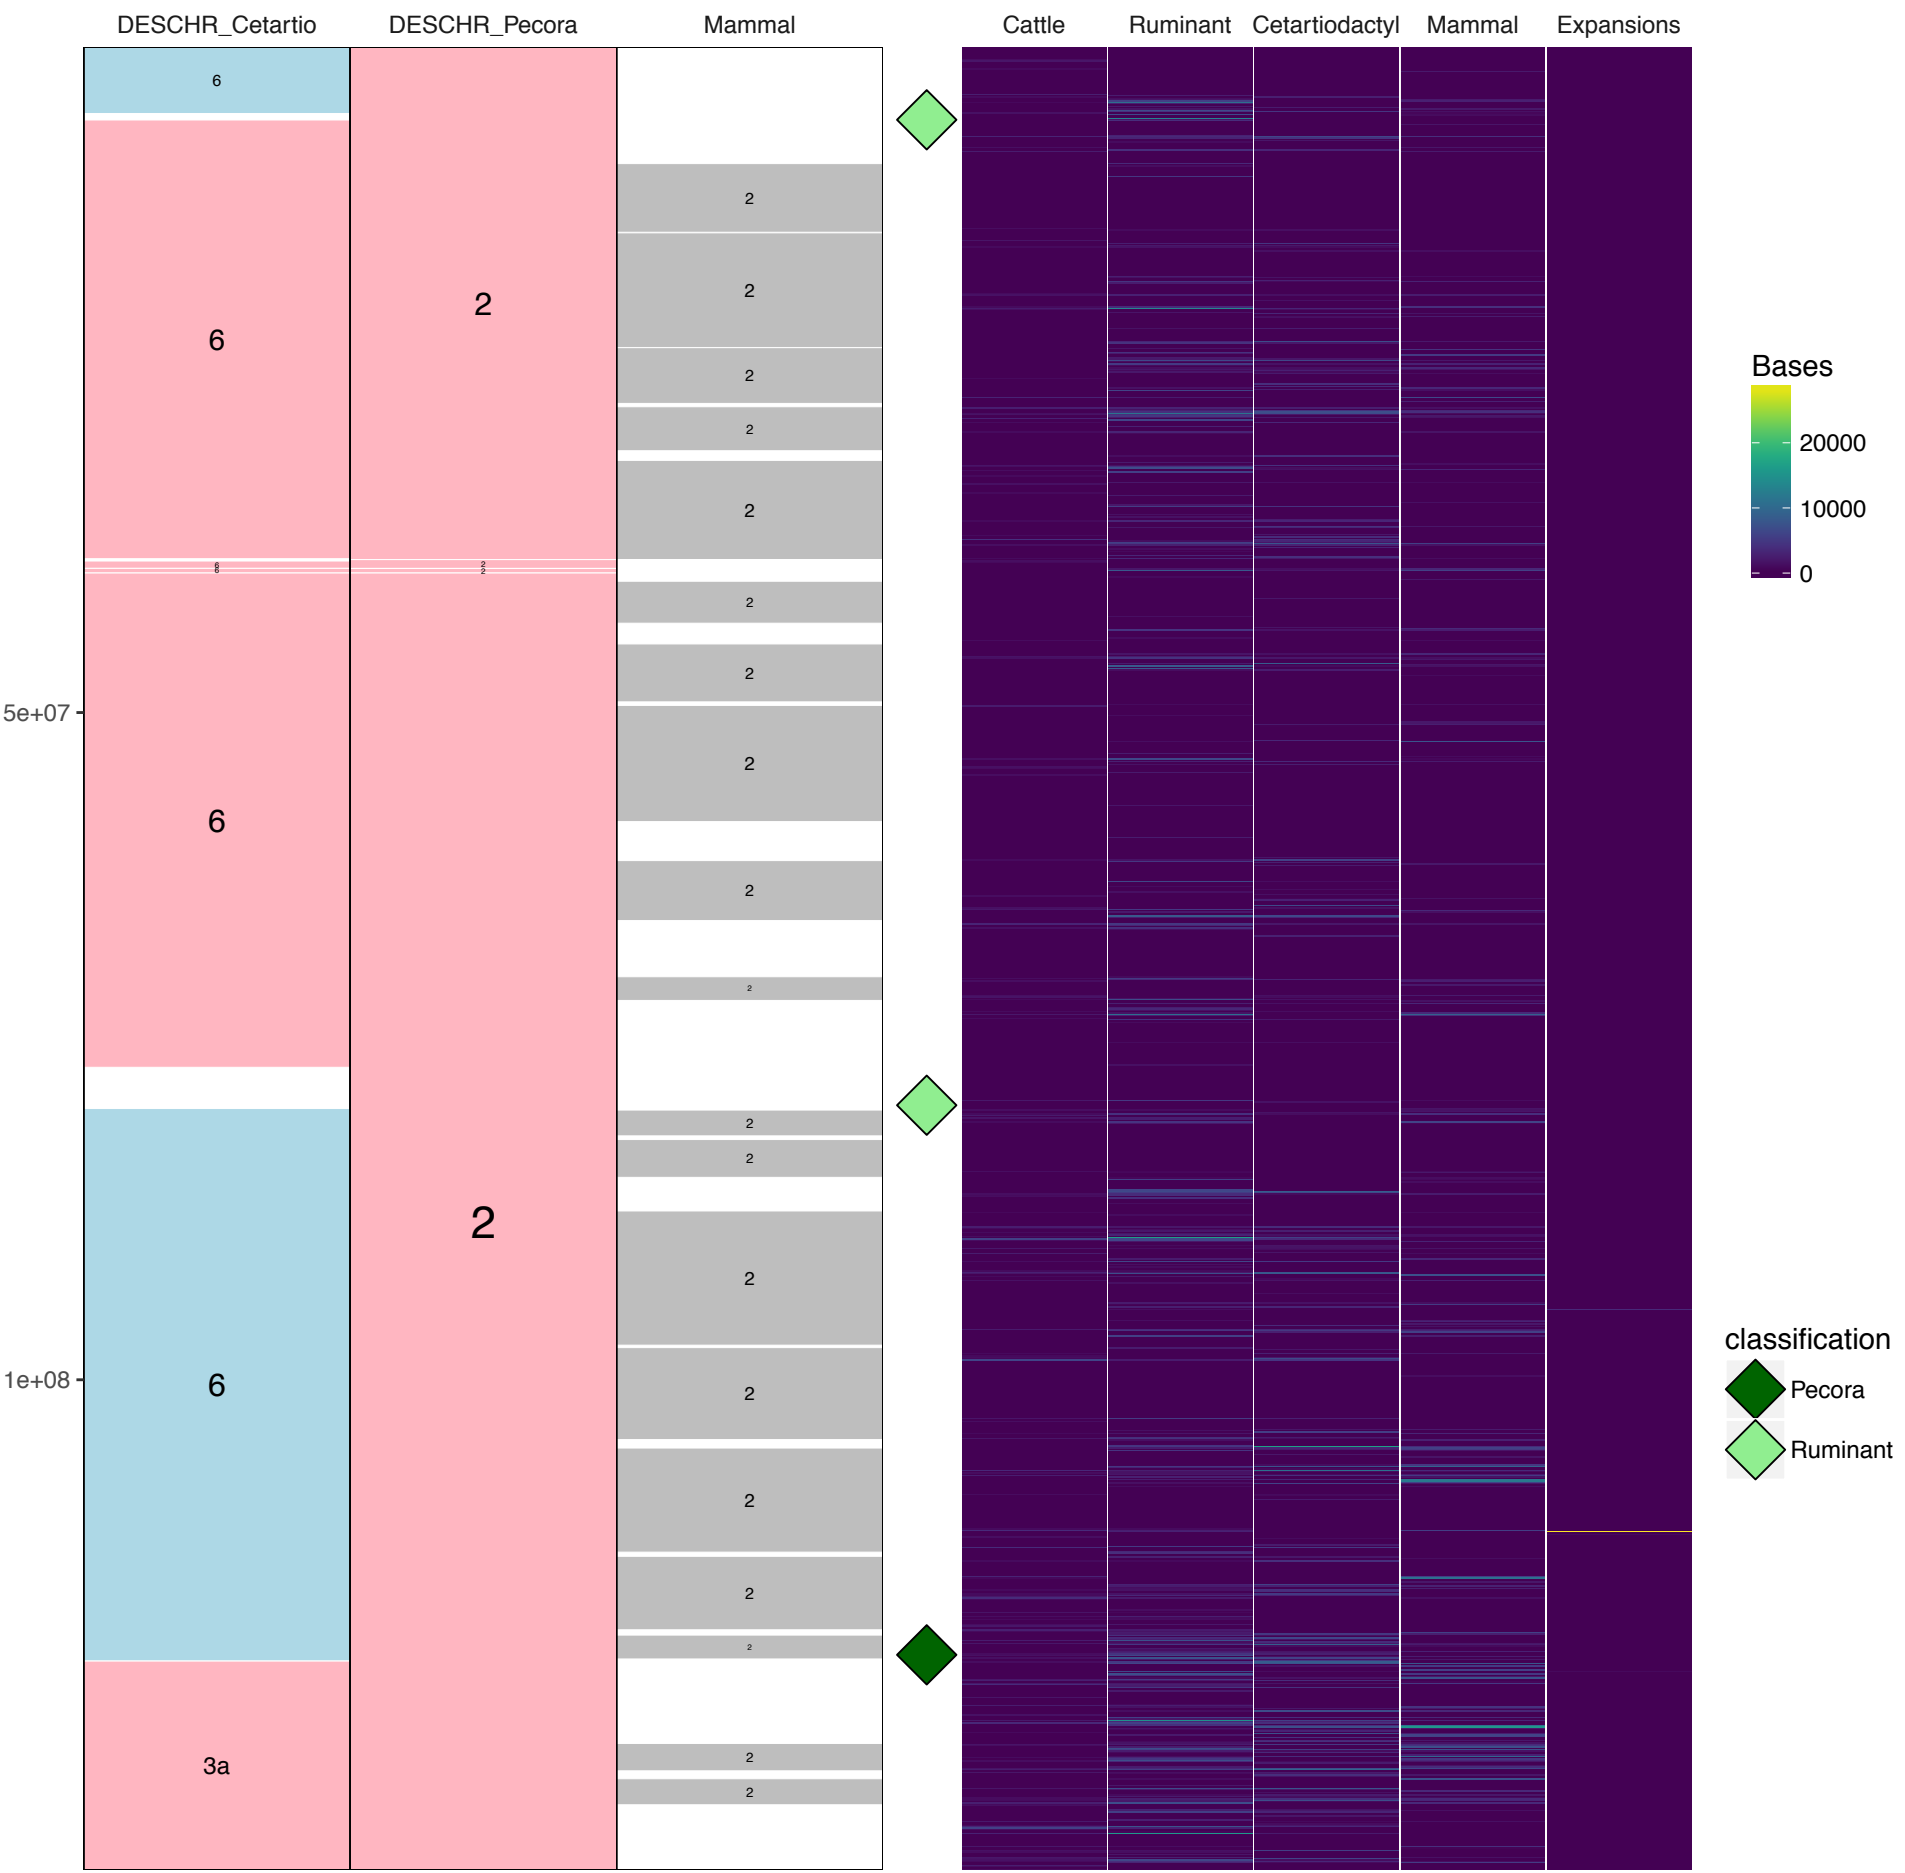

# Cattle chr3

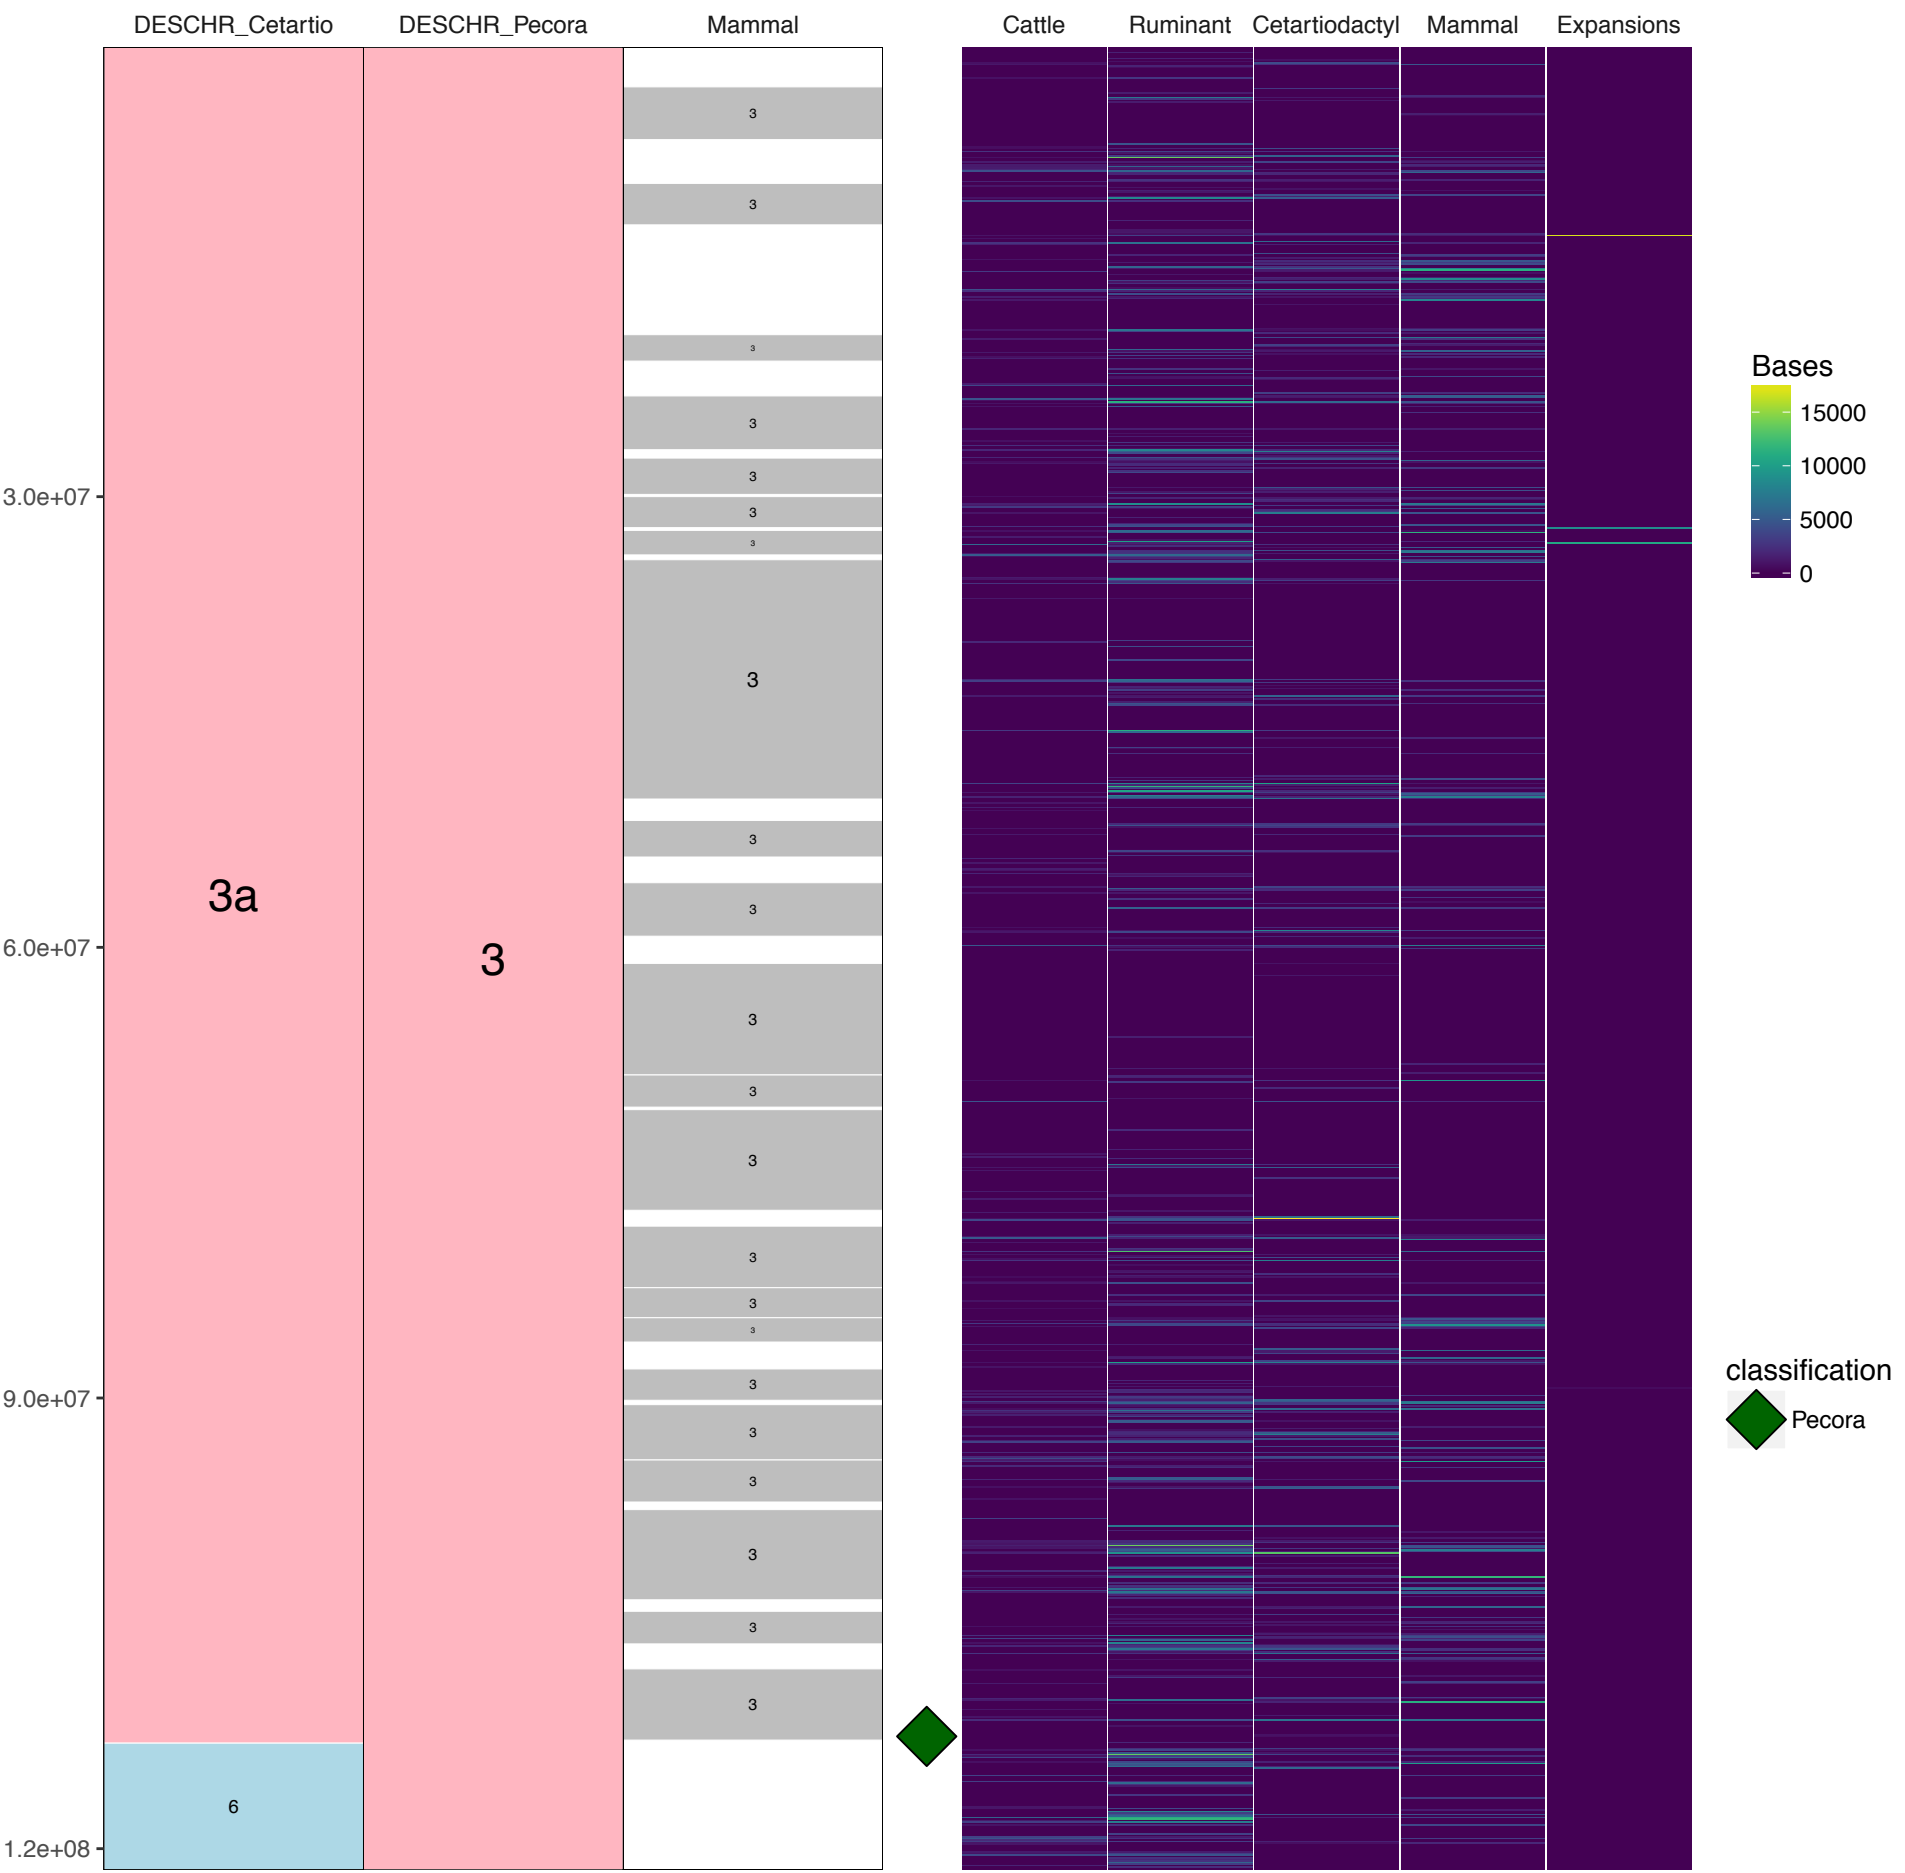

# Cattle chr4

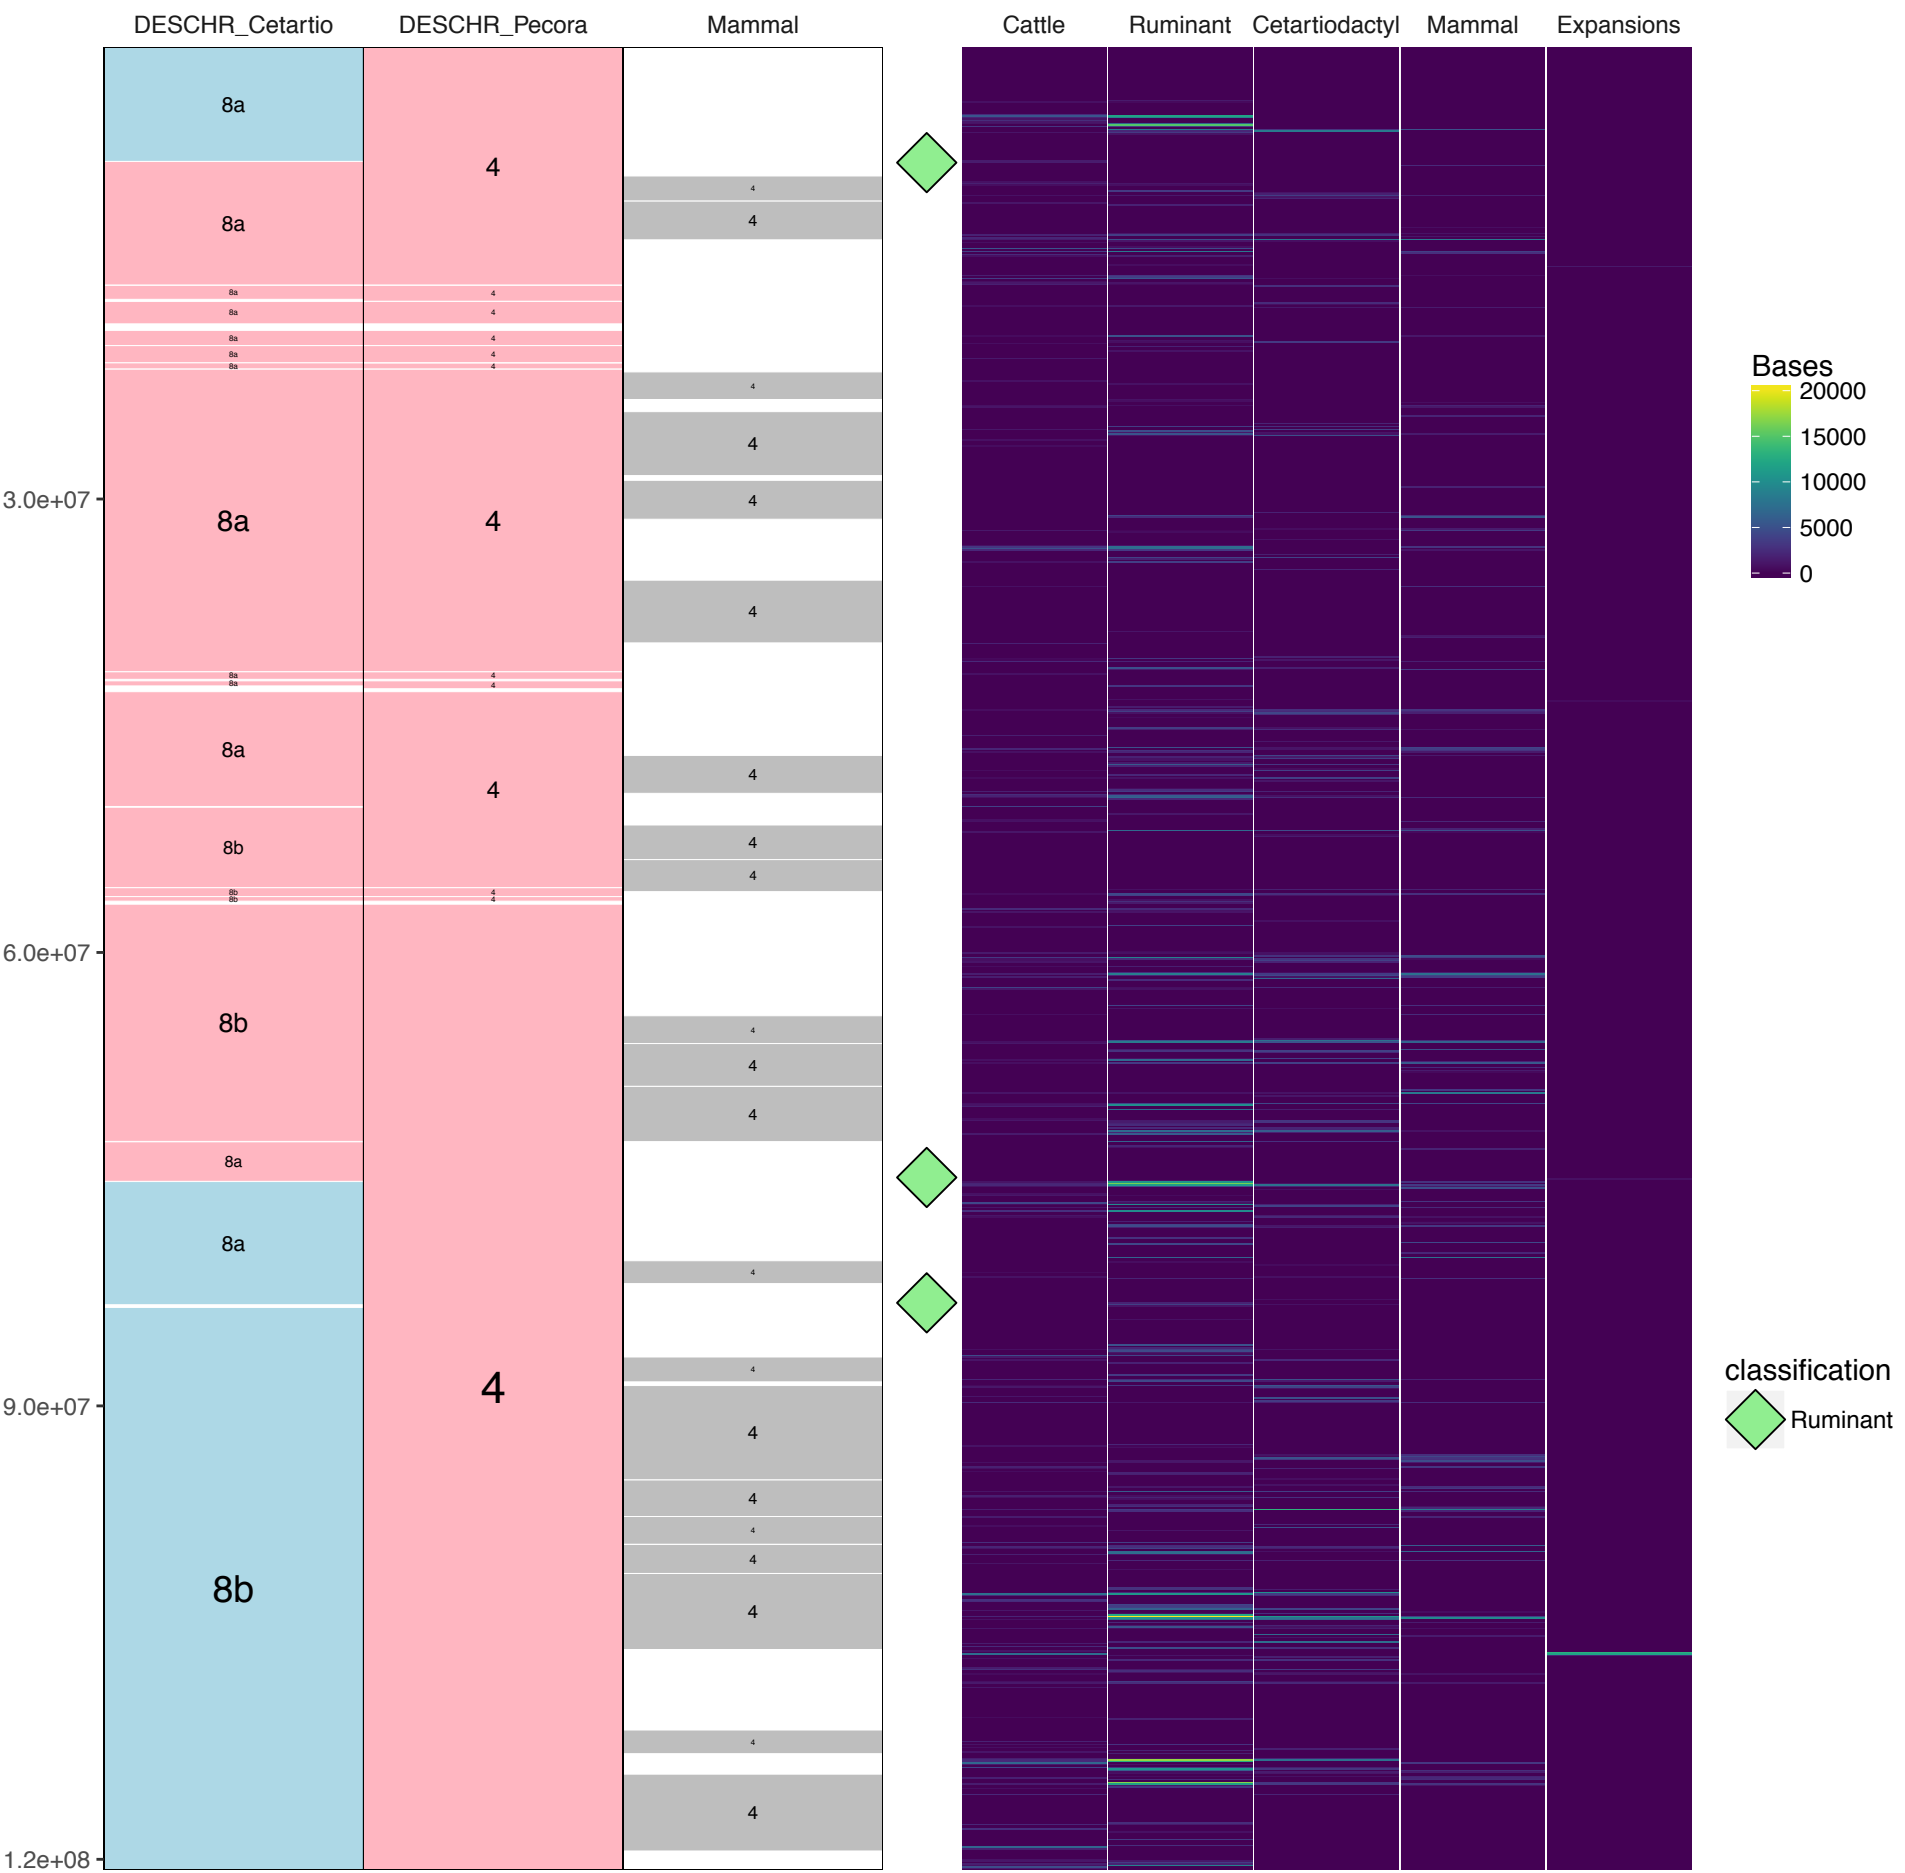

# Cattle chr5

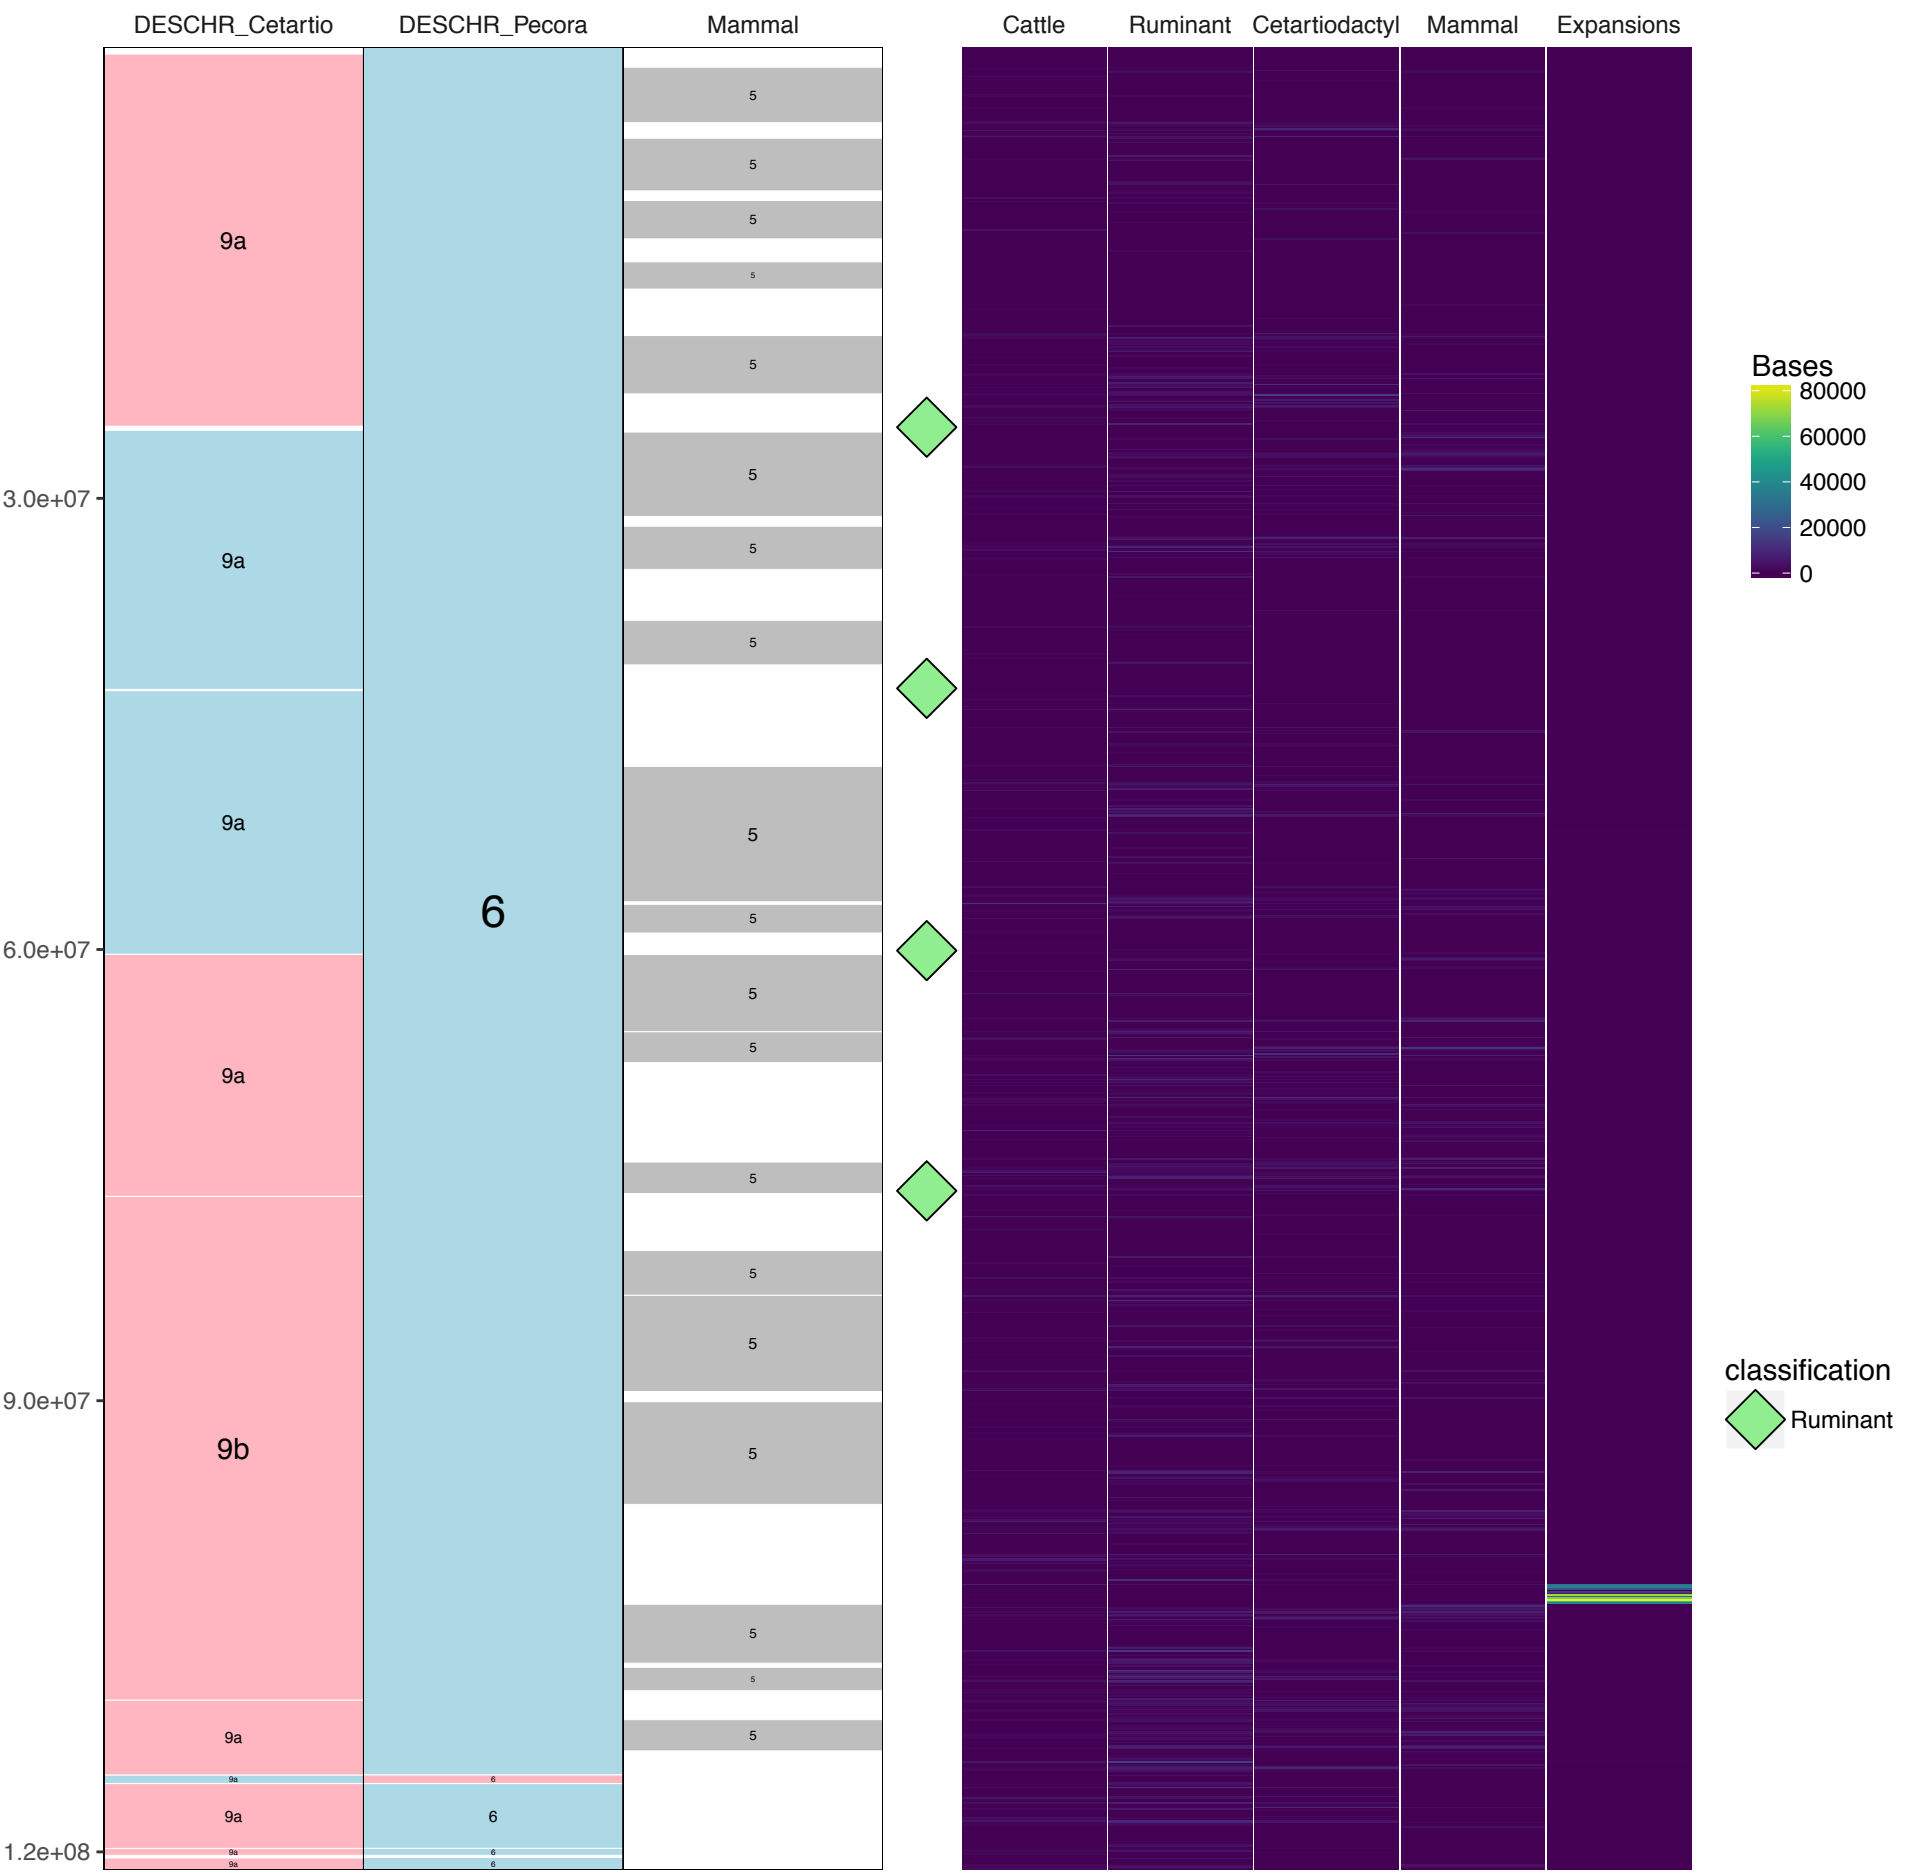

# Cattle chr6

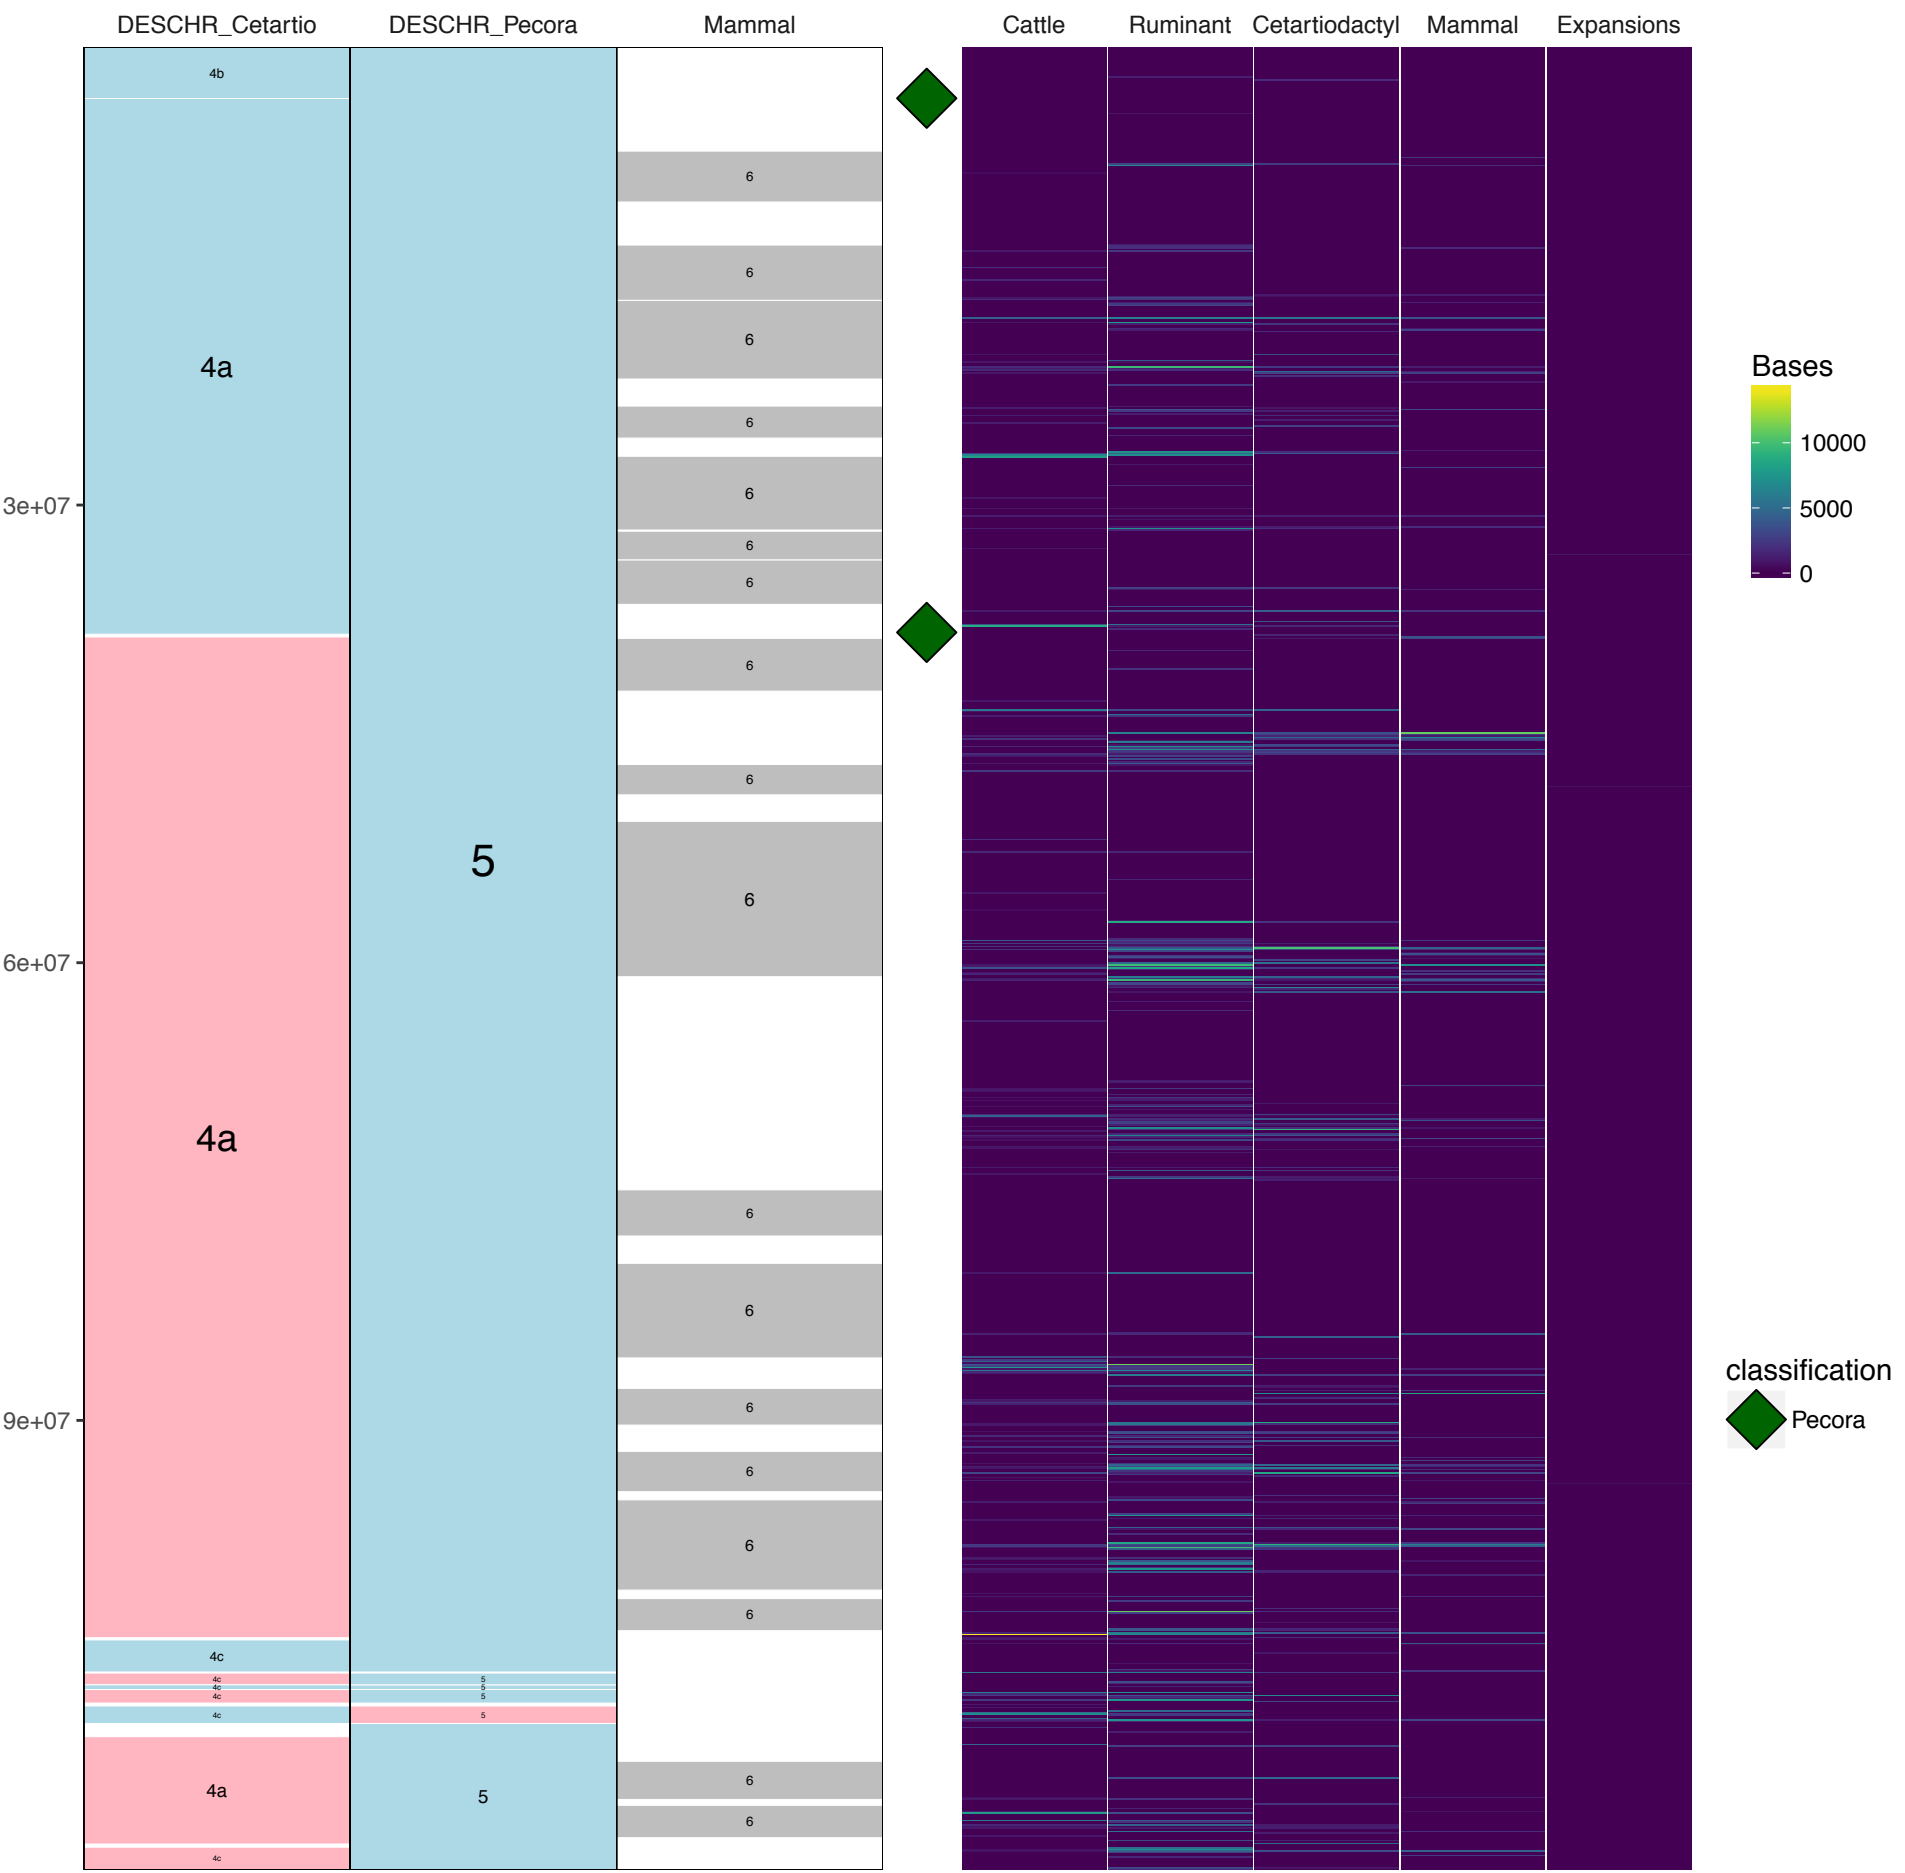

# Cattle chr7

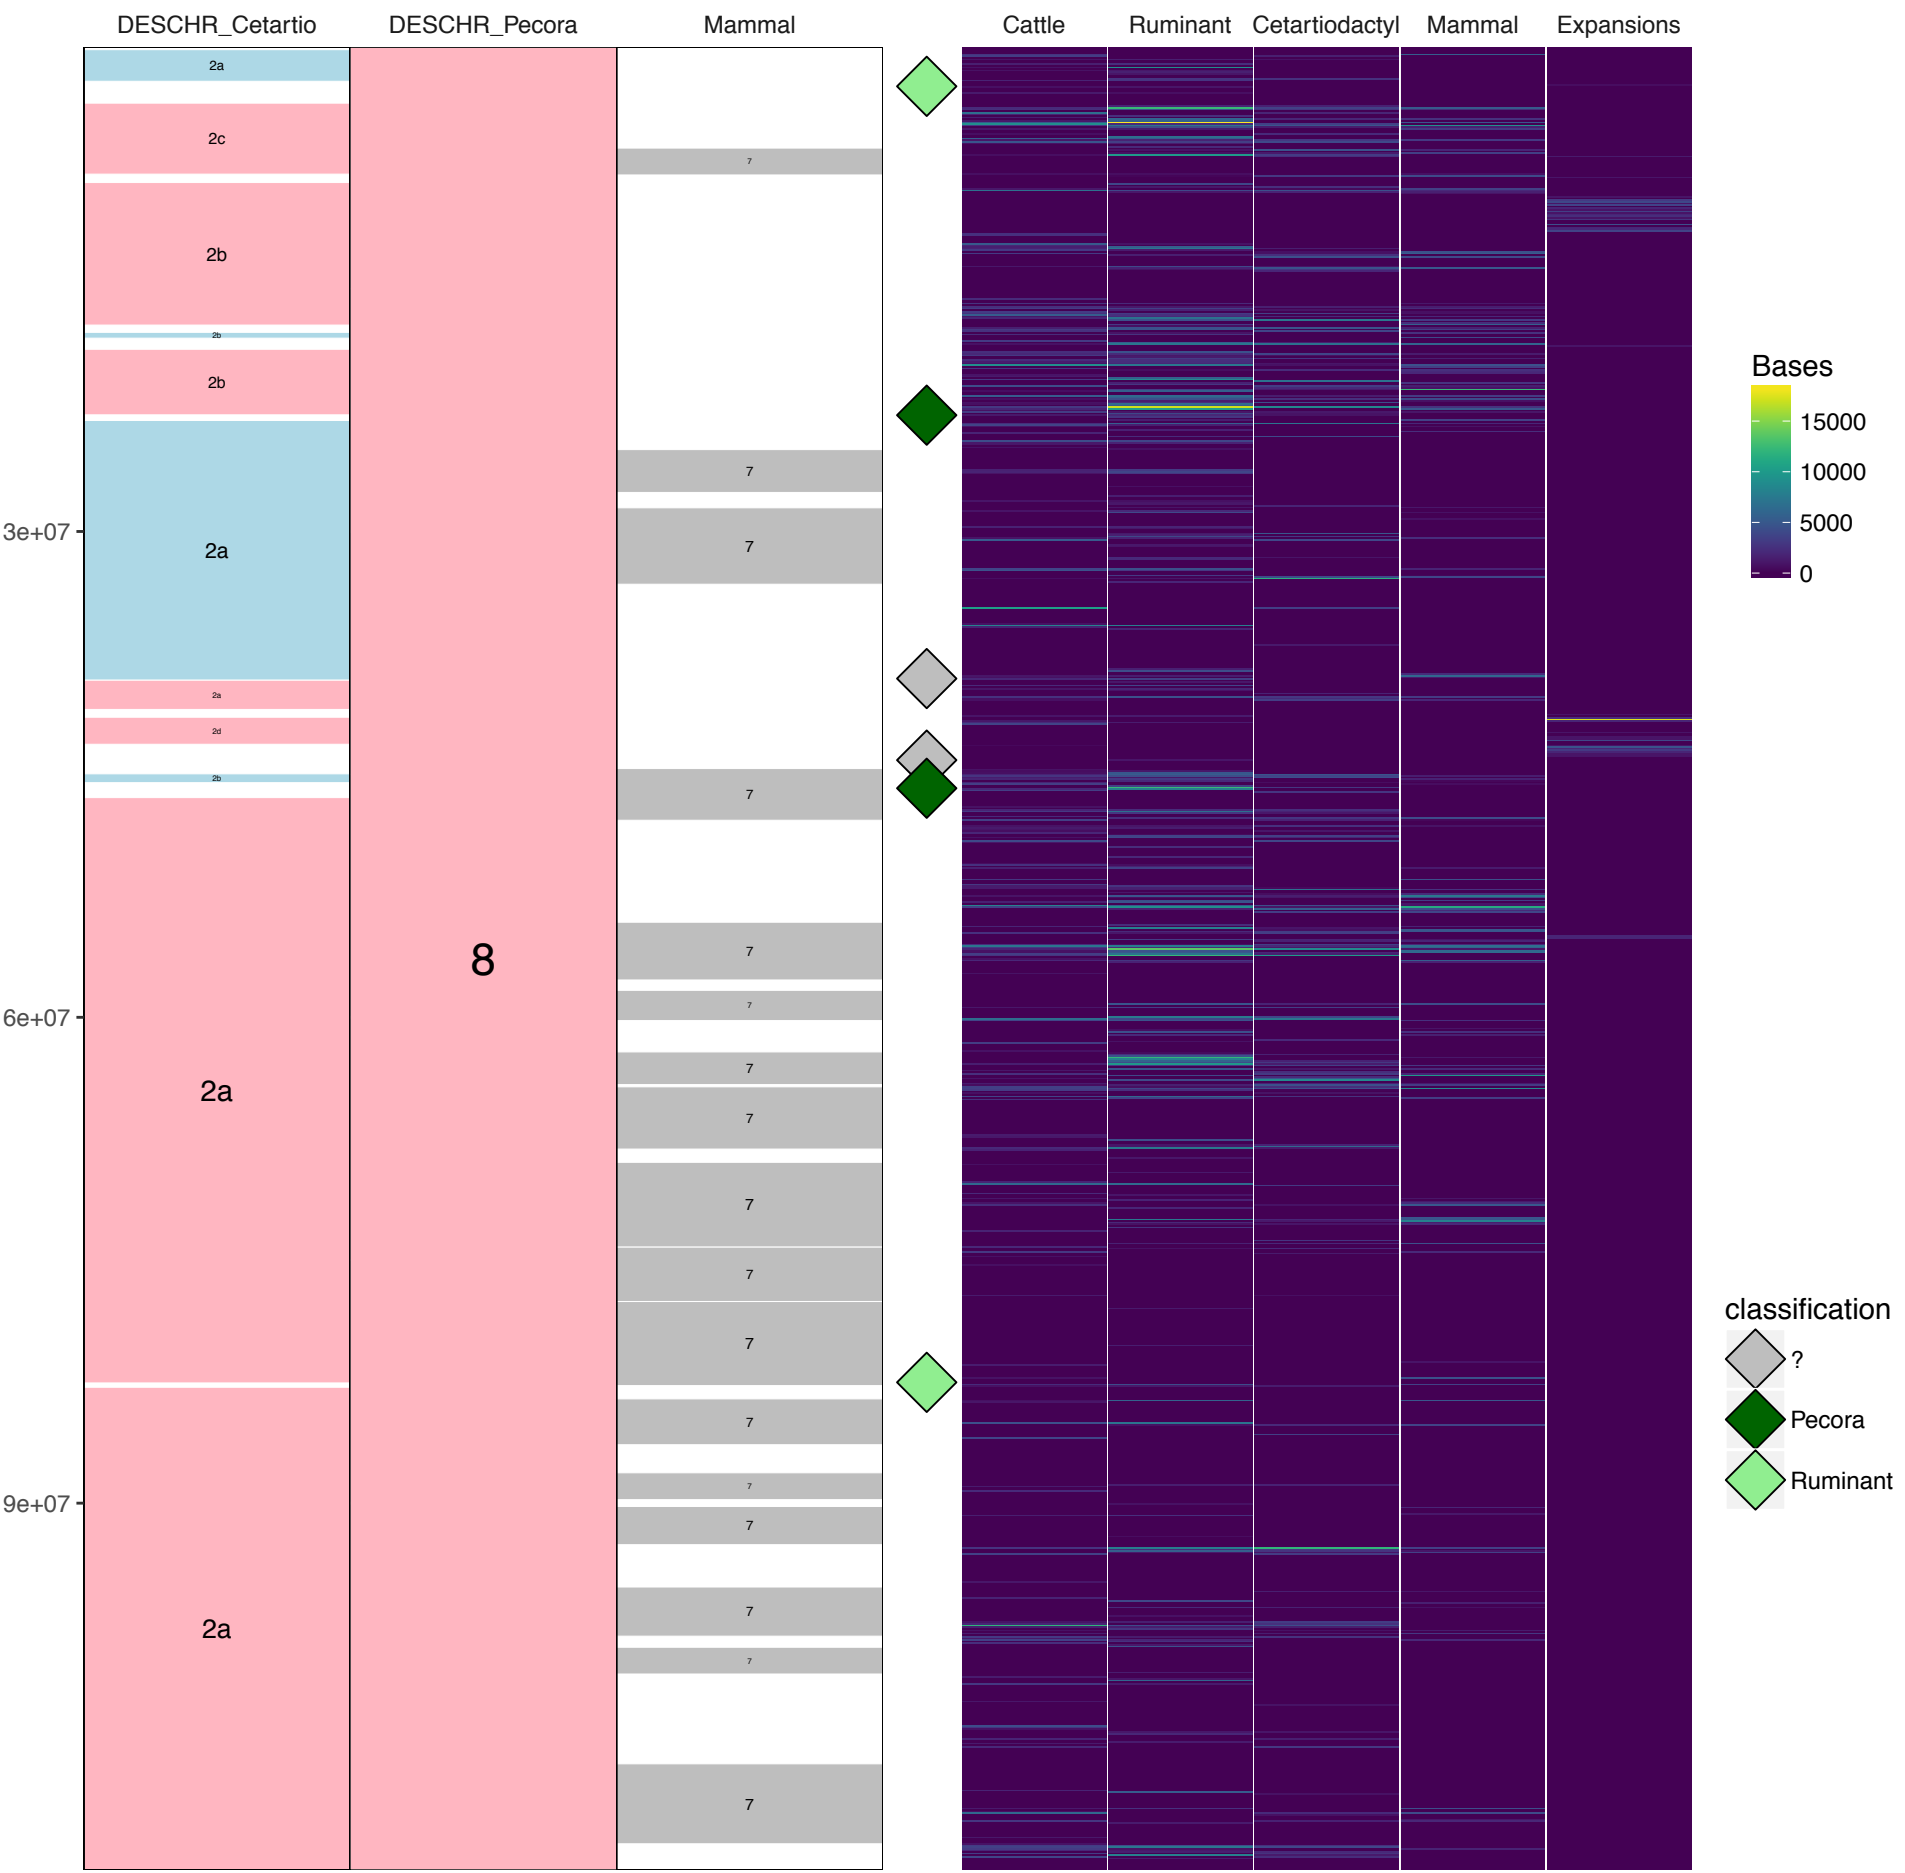



# Cattle chr8

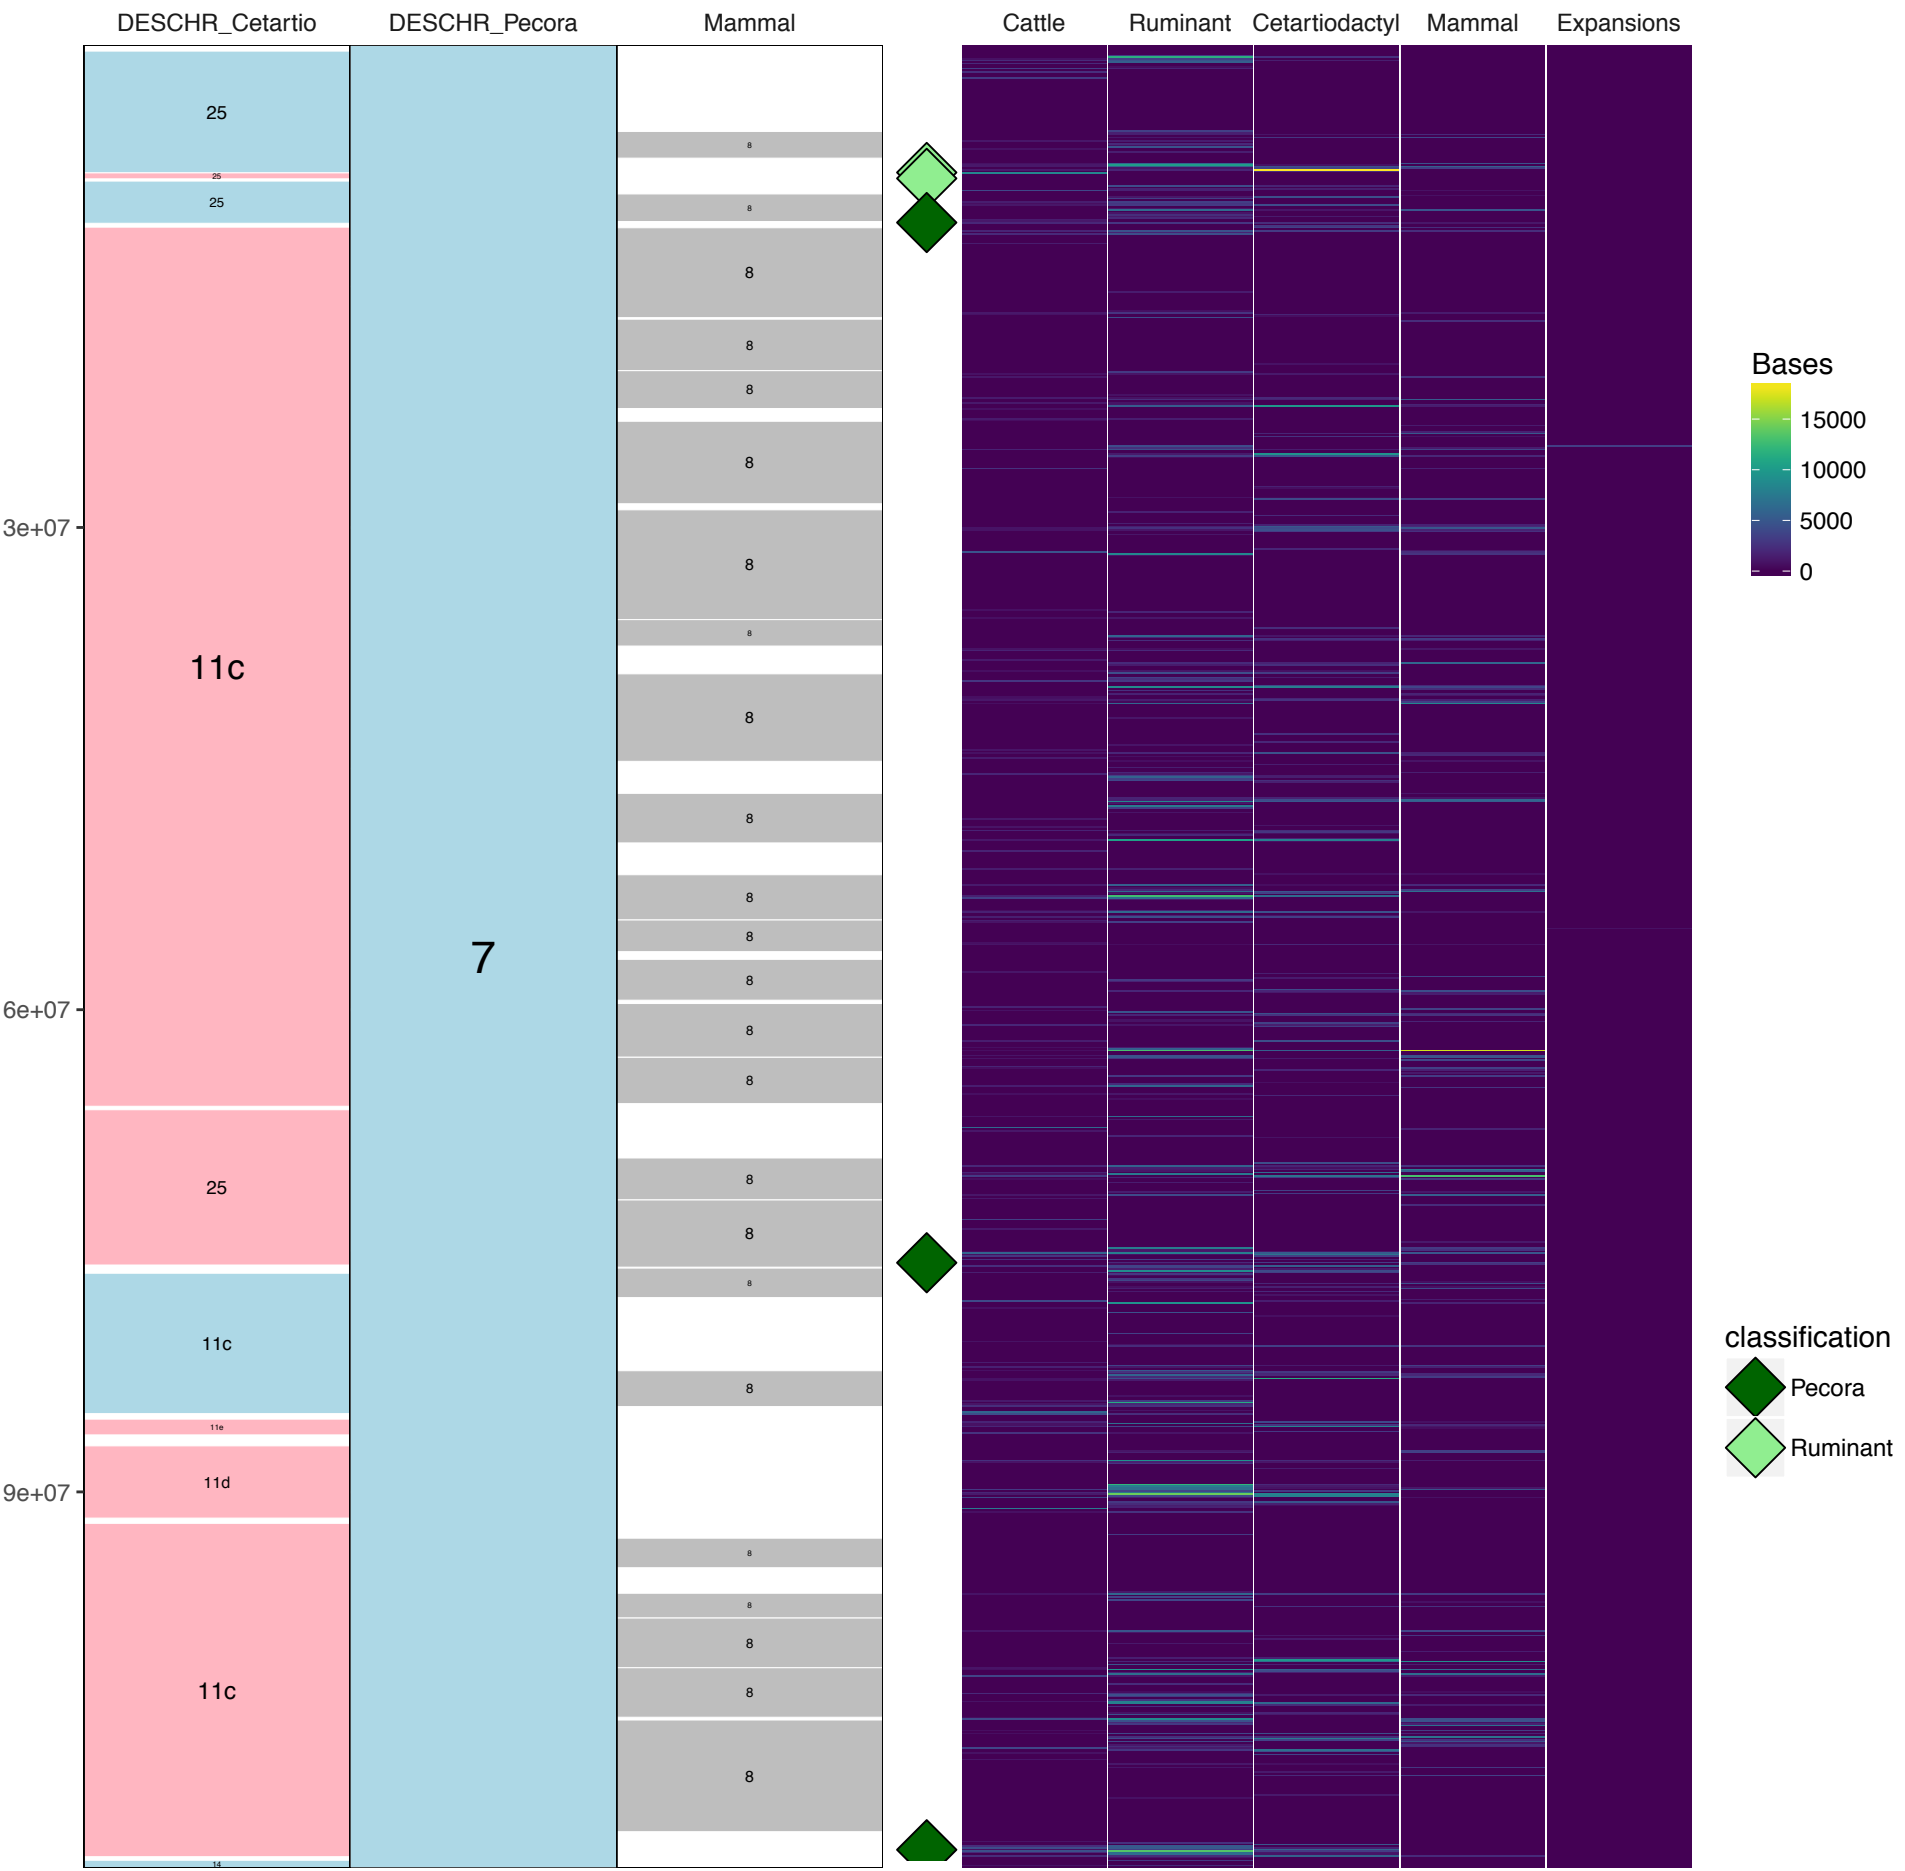

# Cattle chr9

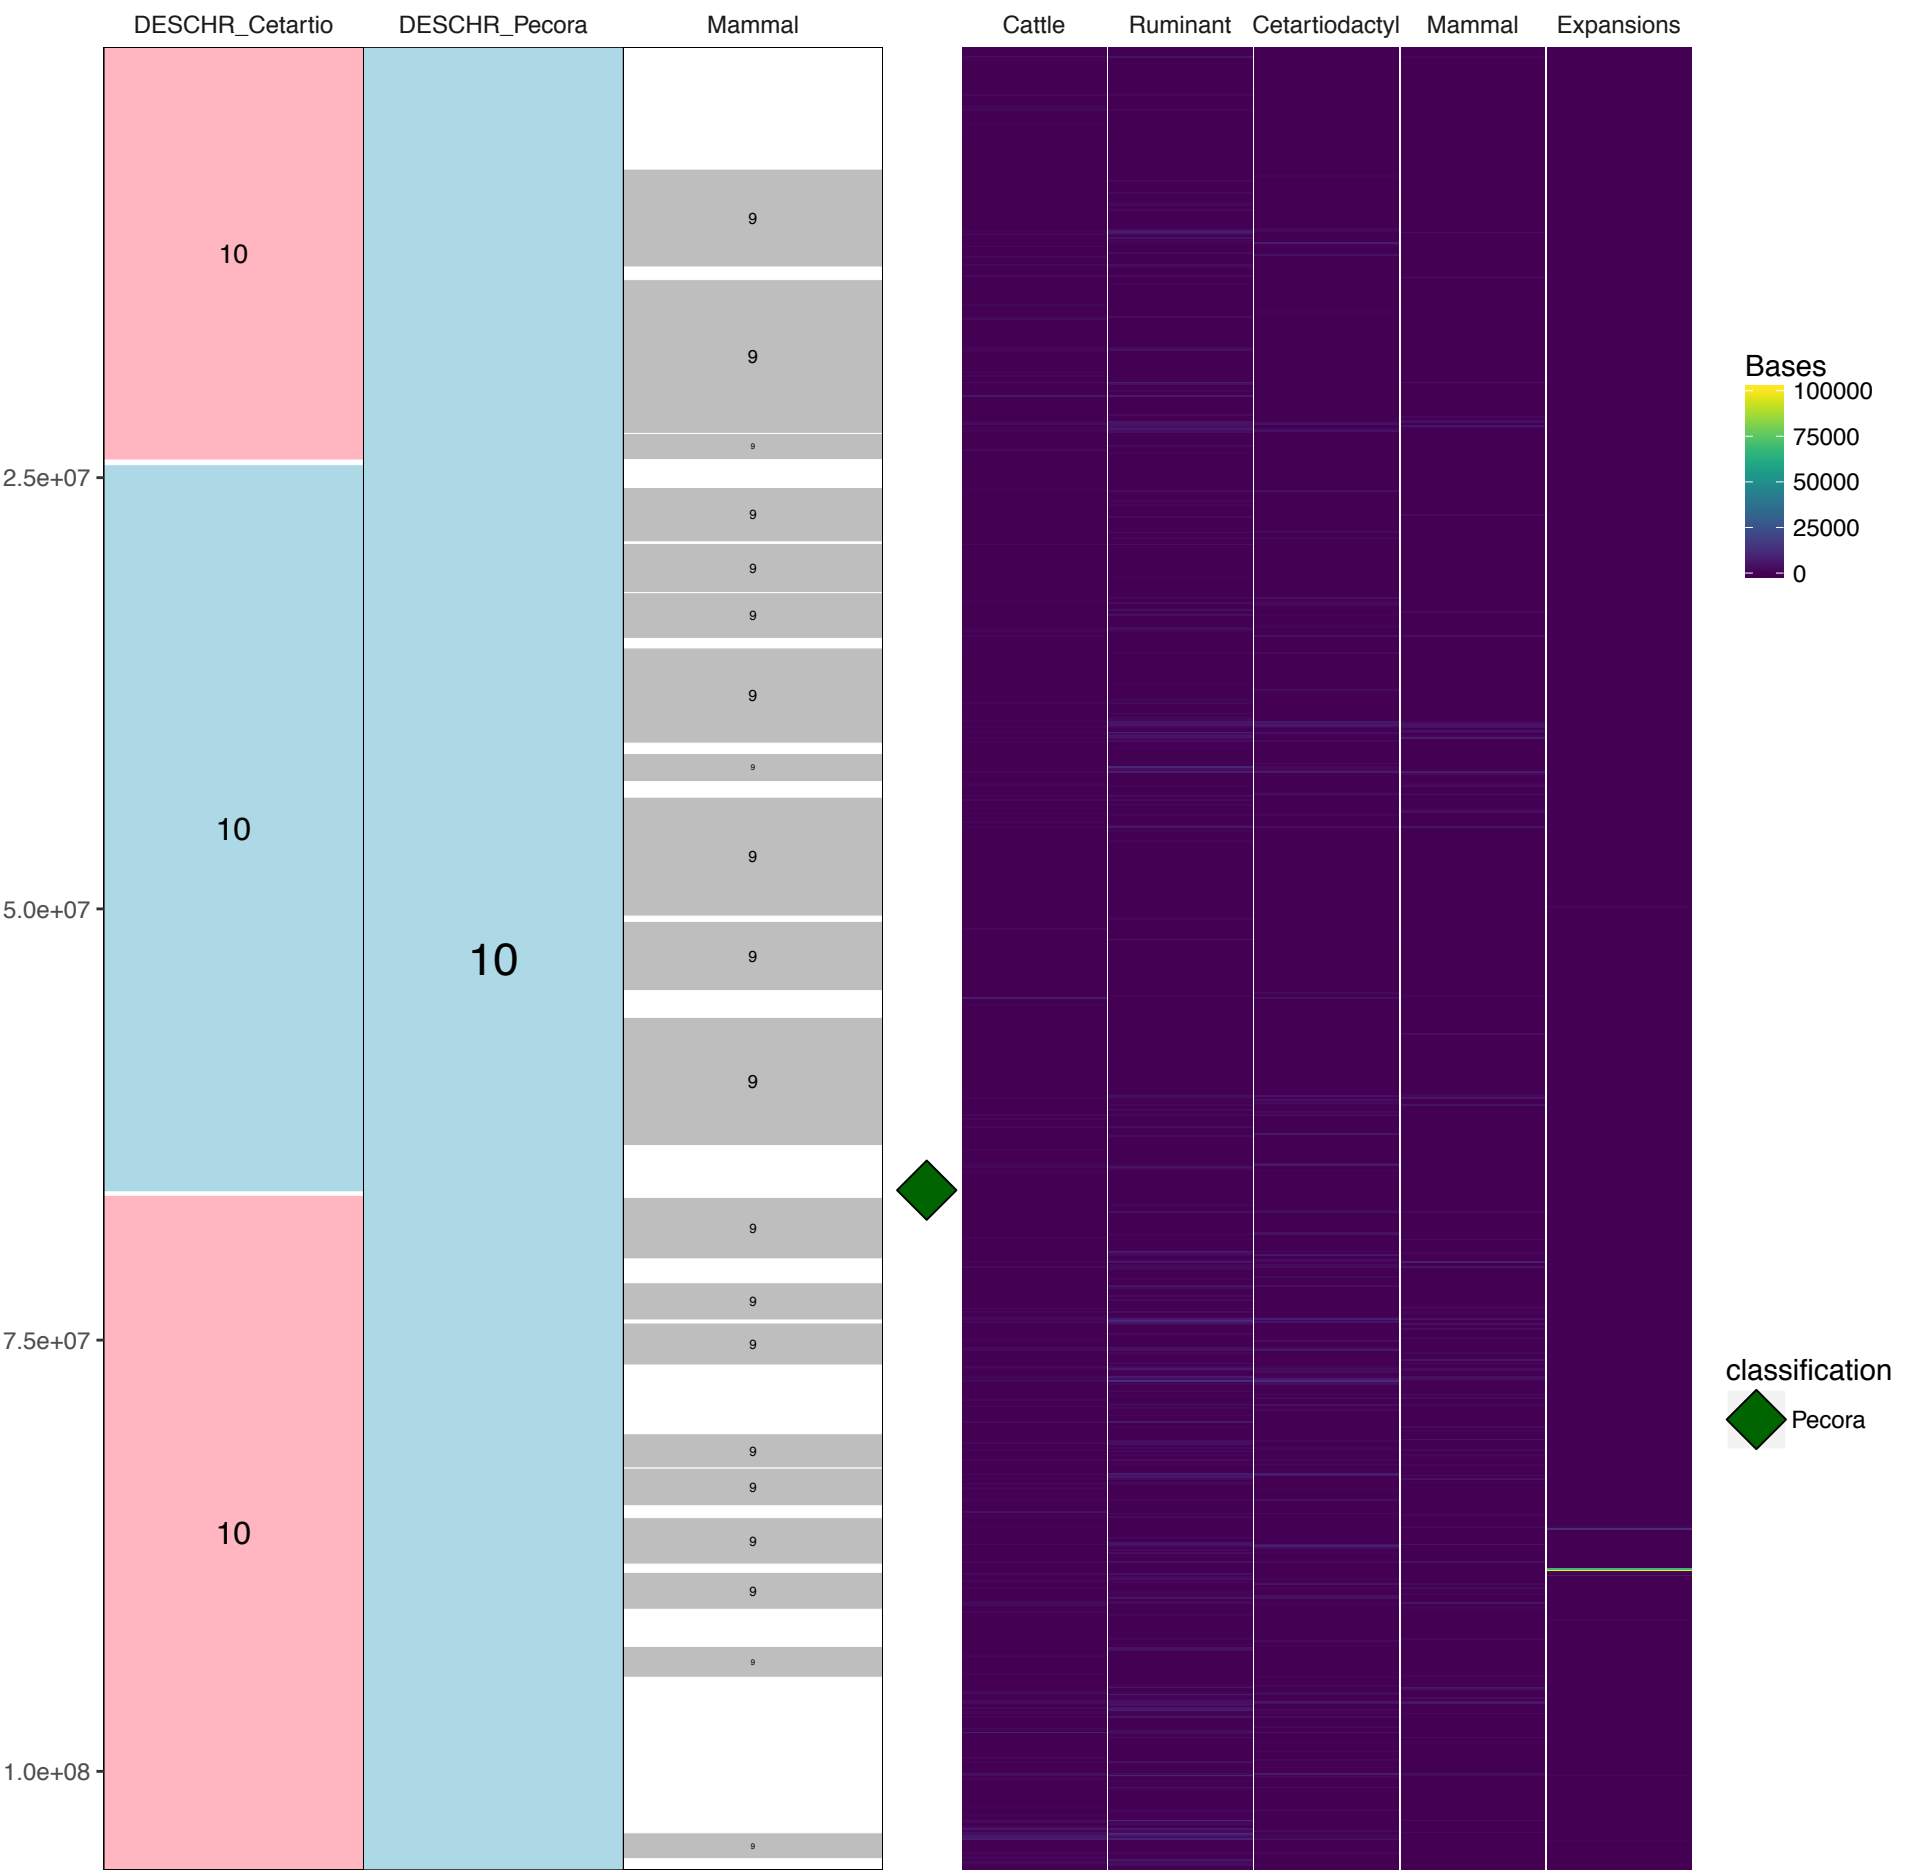

# Cattle chr10

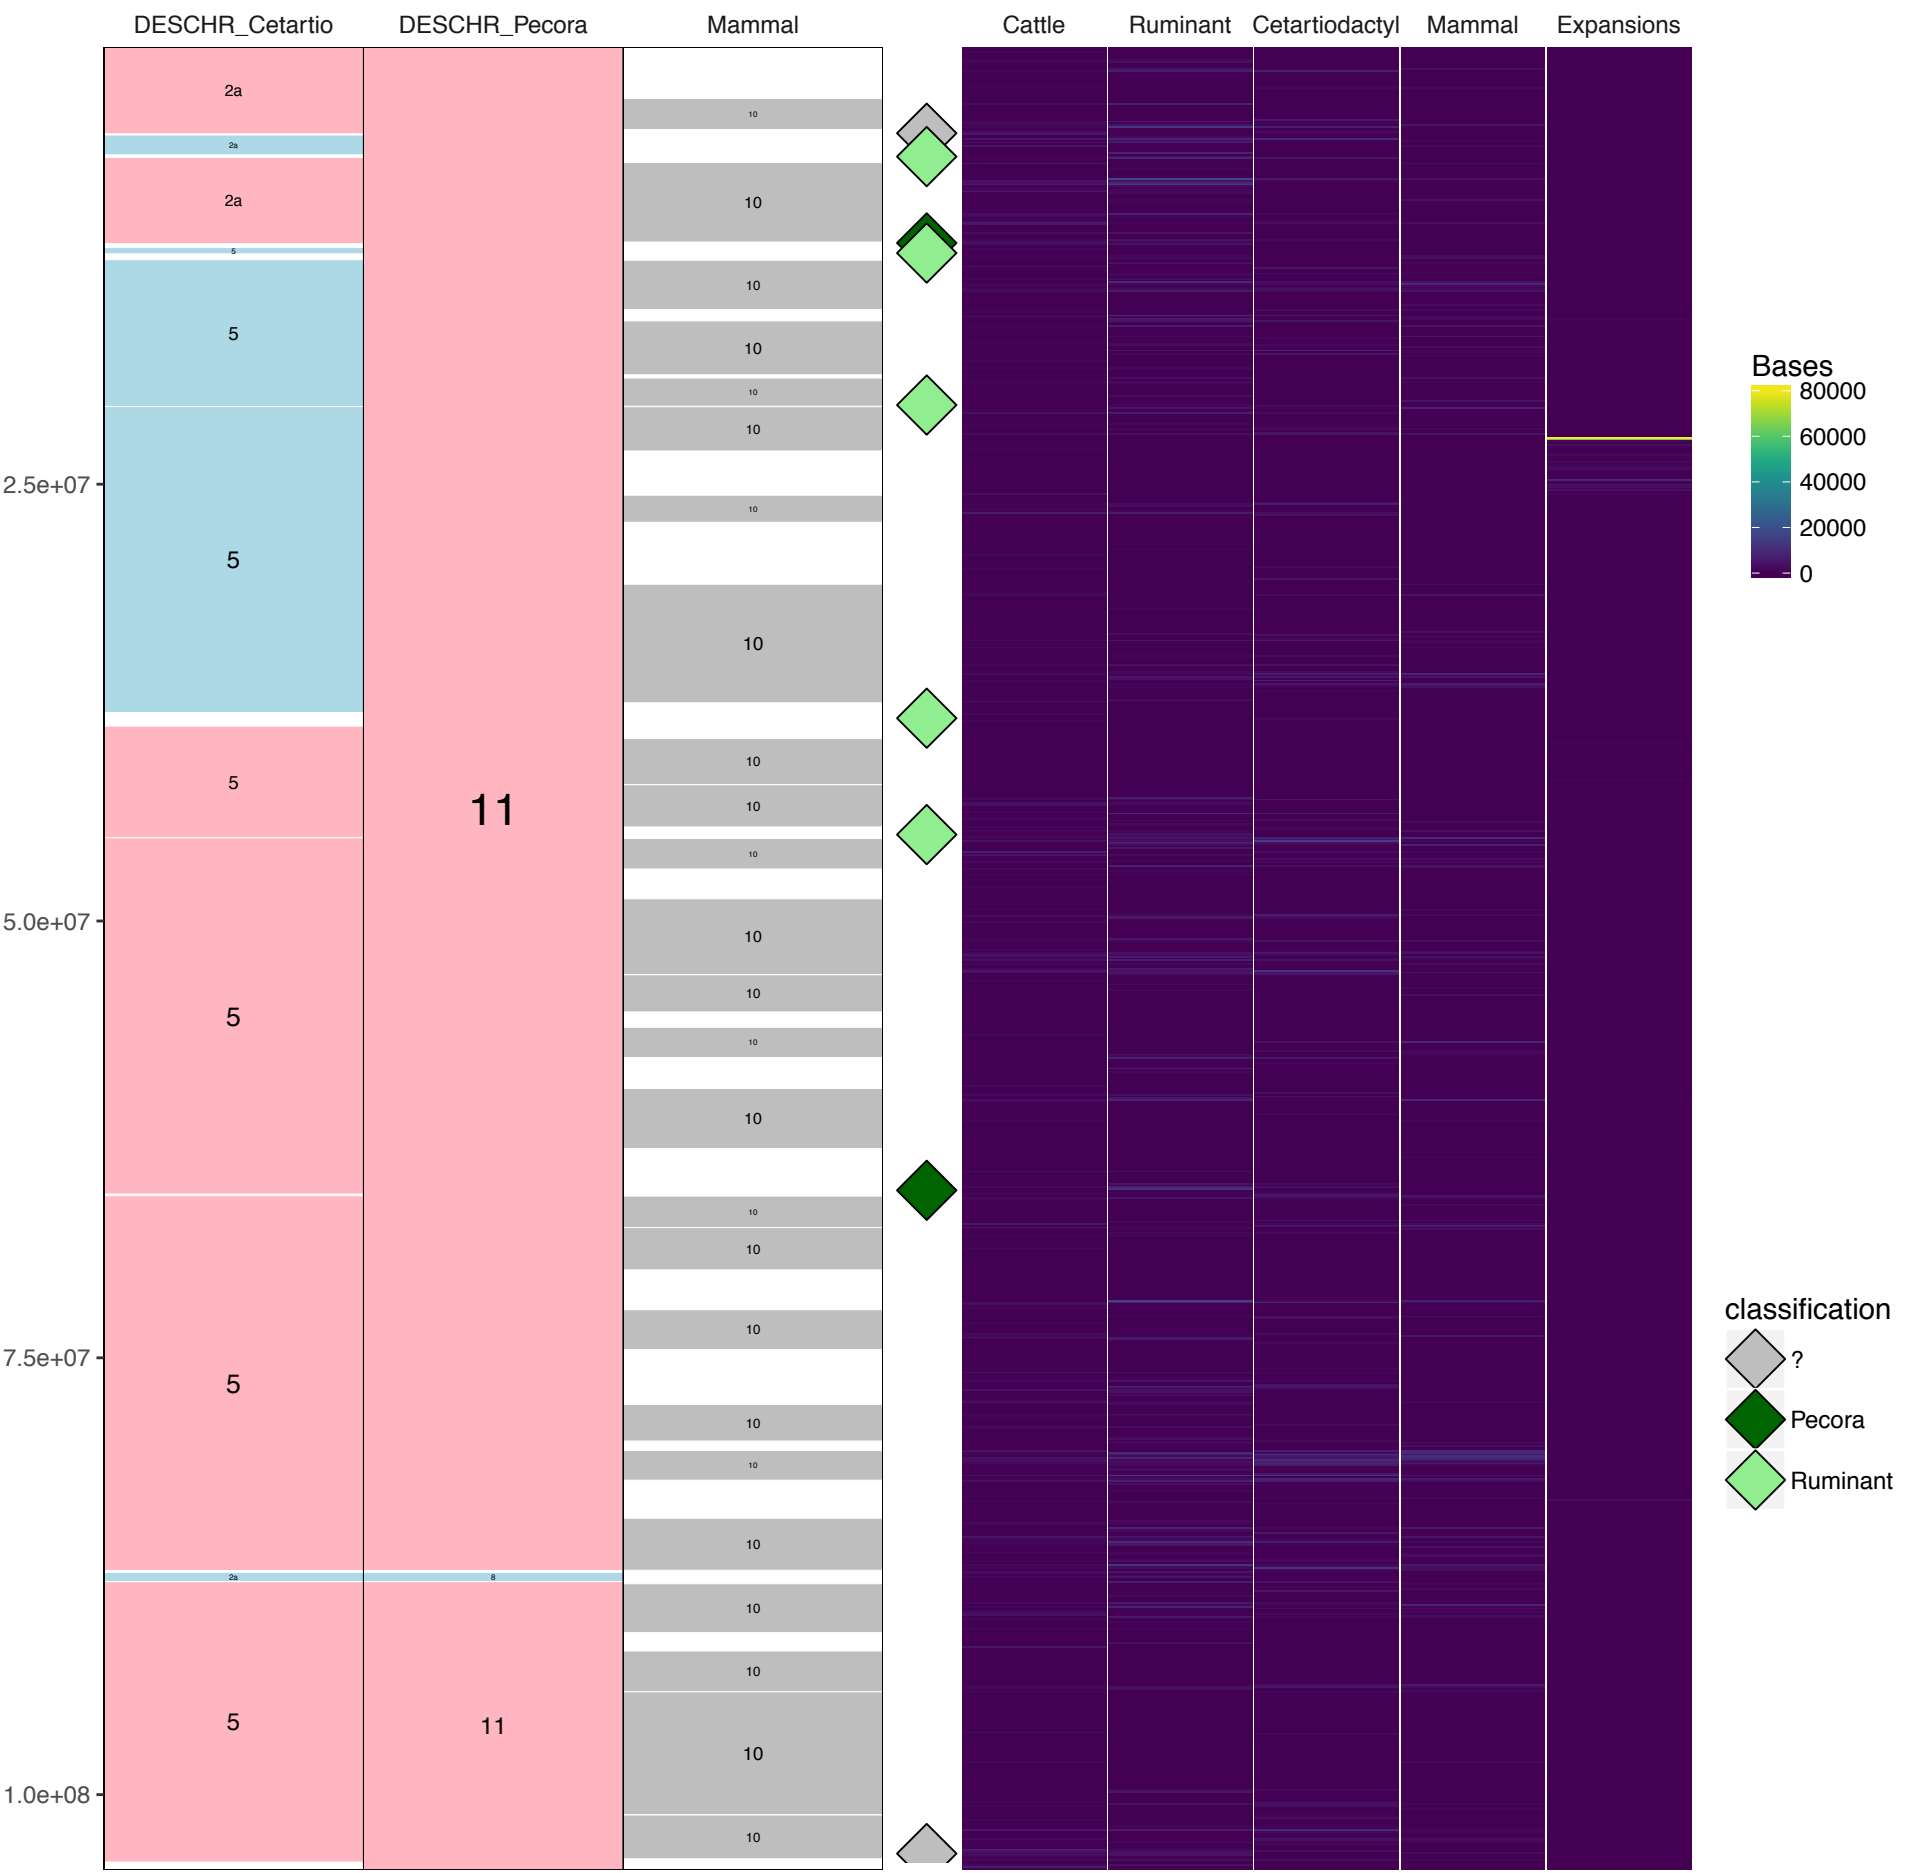

# Cattle chr11

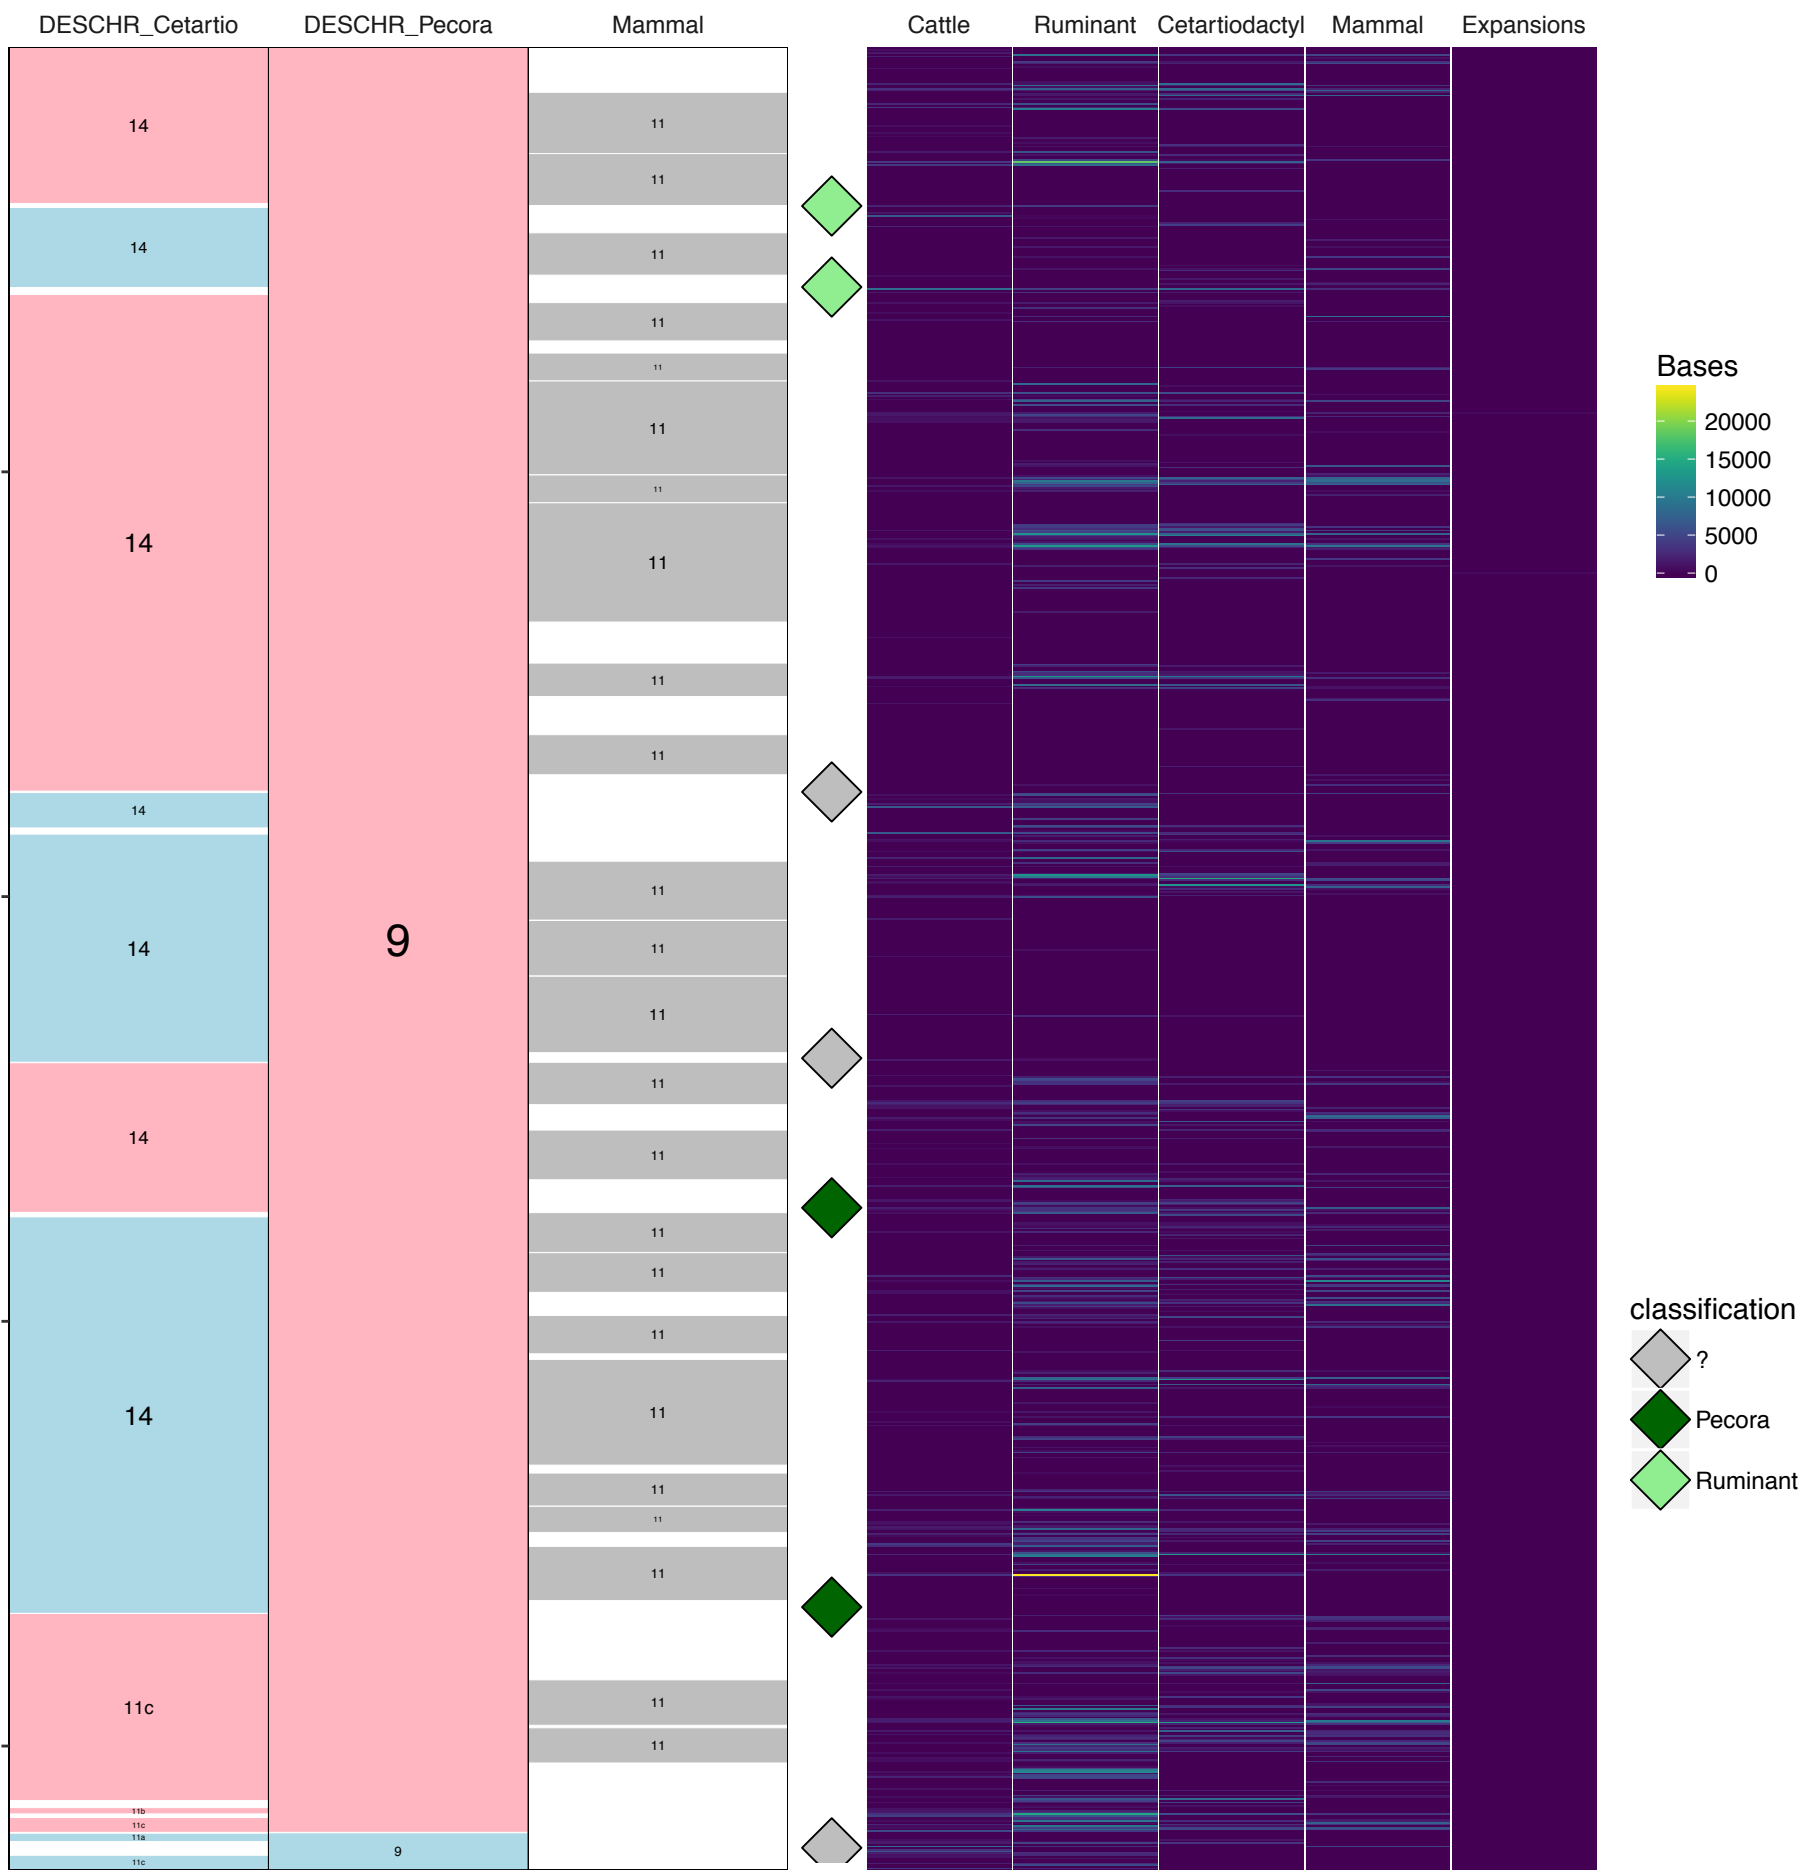

# Cattle chr12

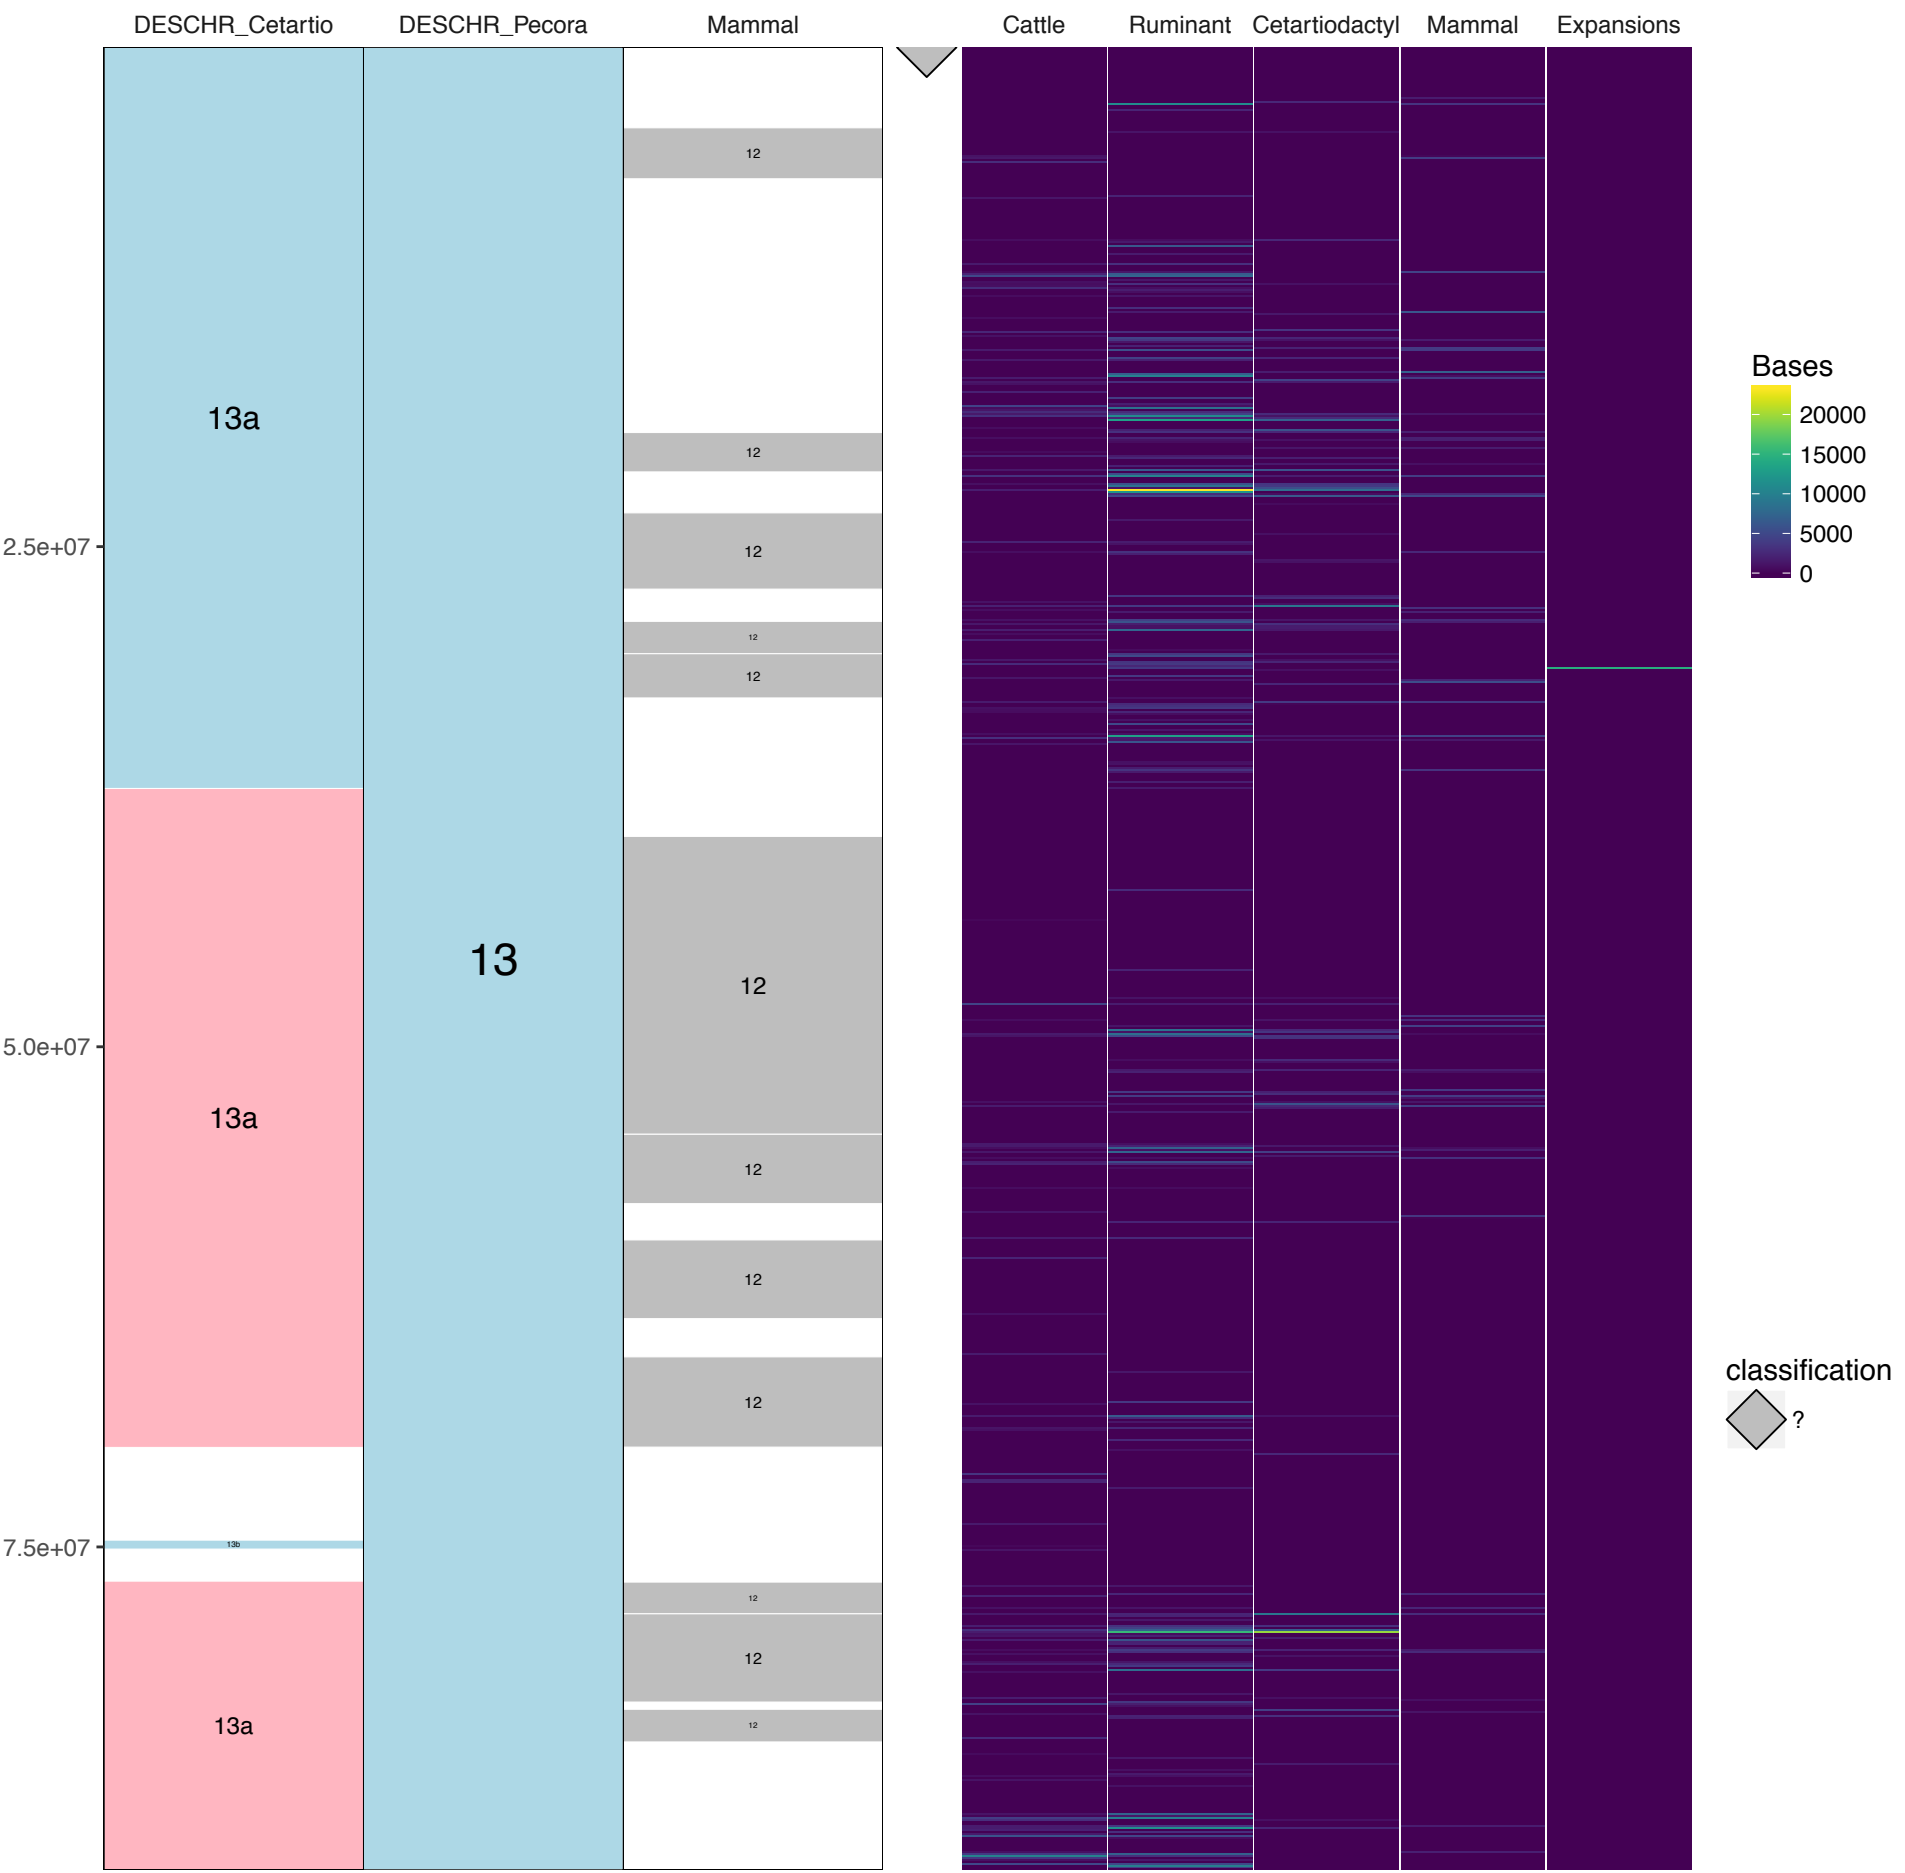

# Cattle chr13

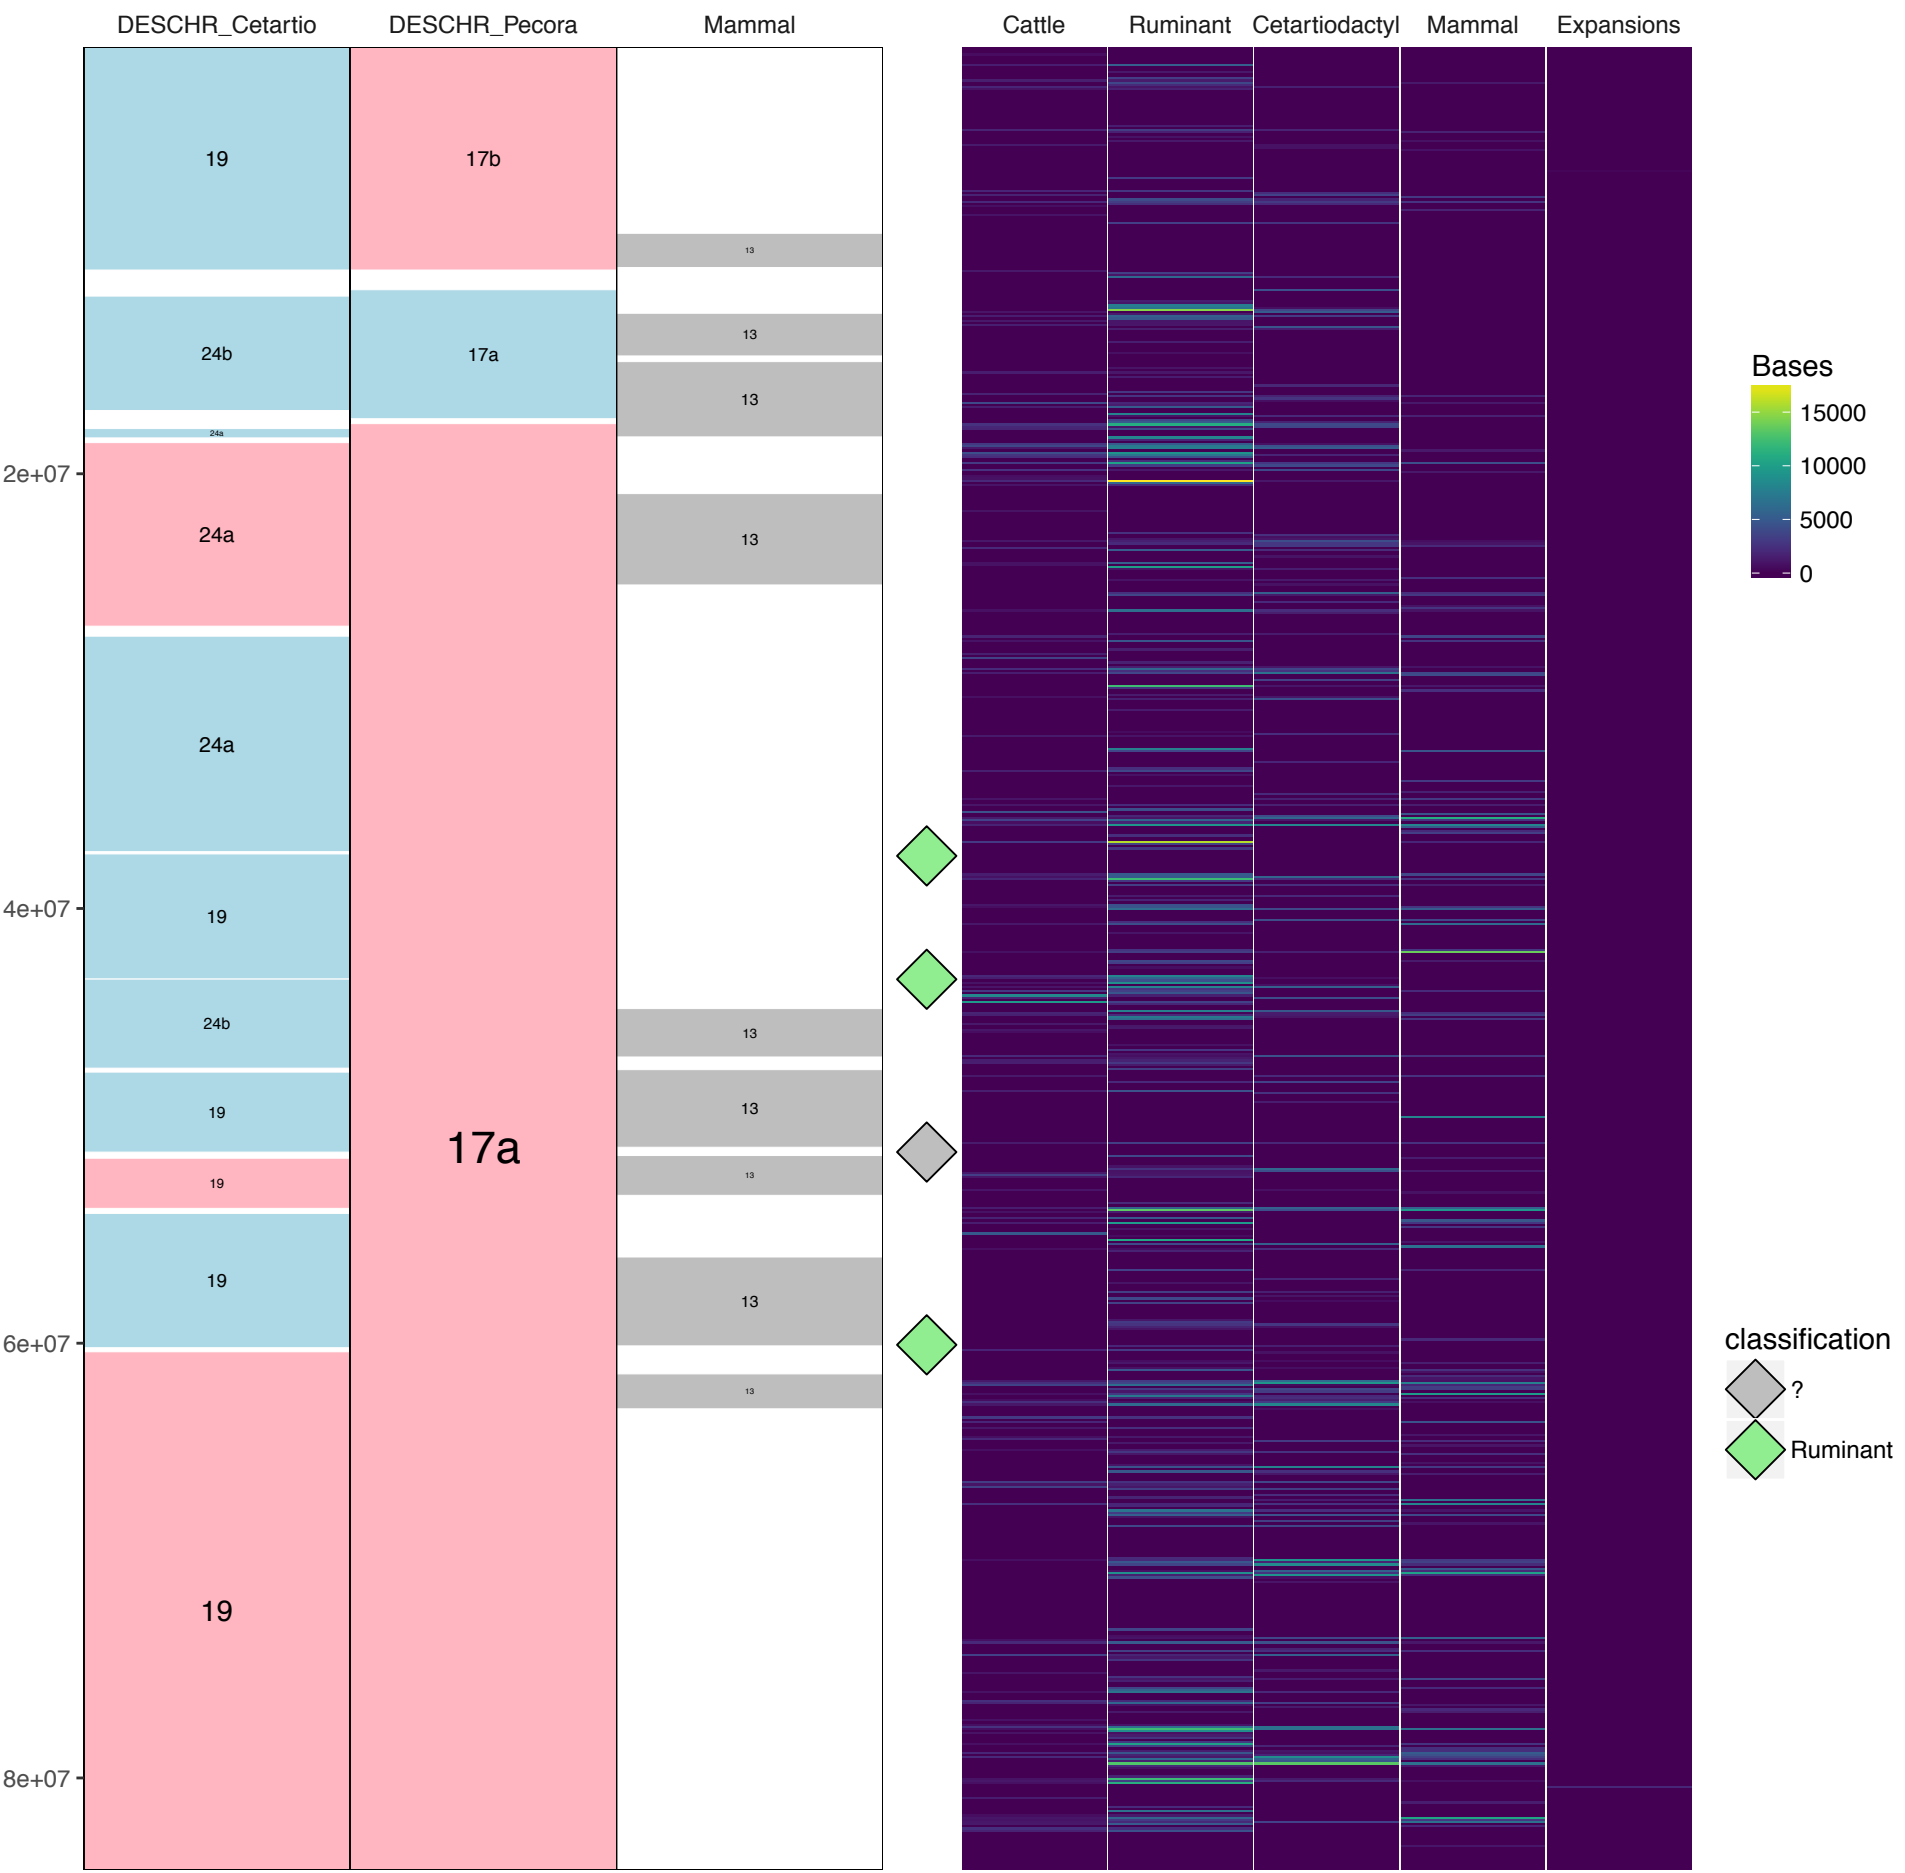

# Cattle chr14

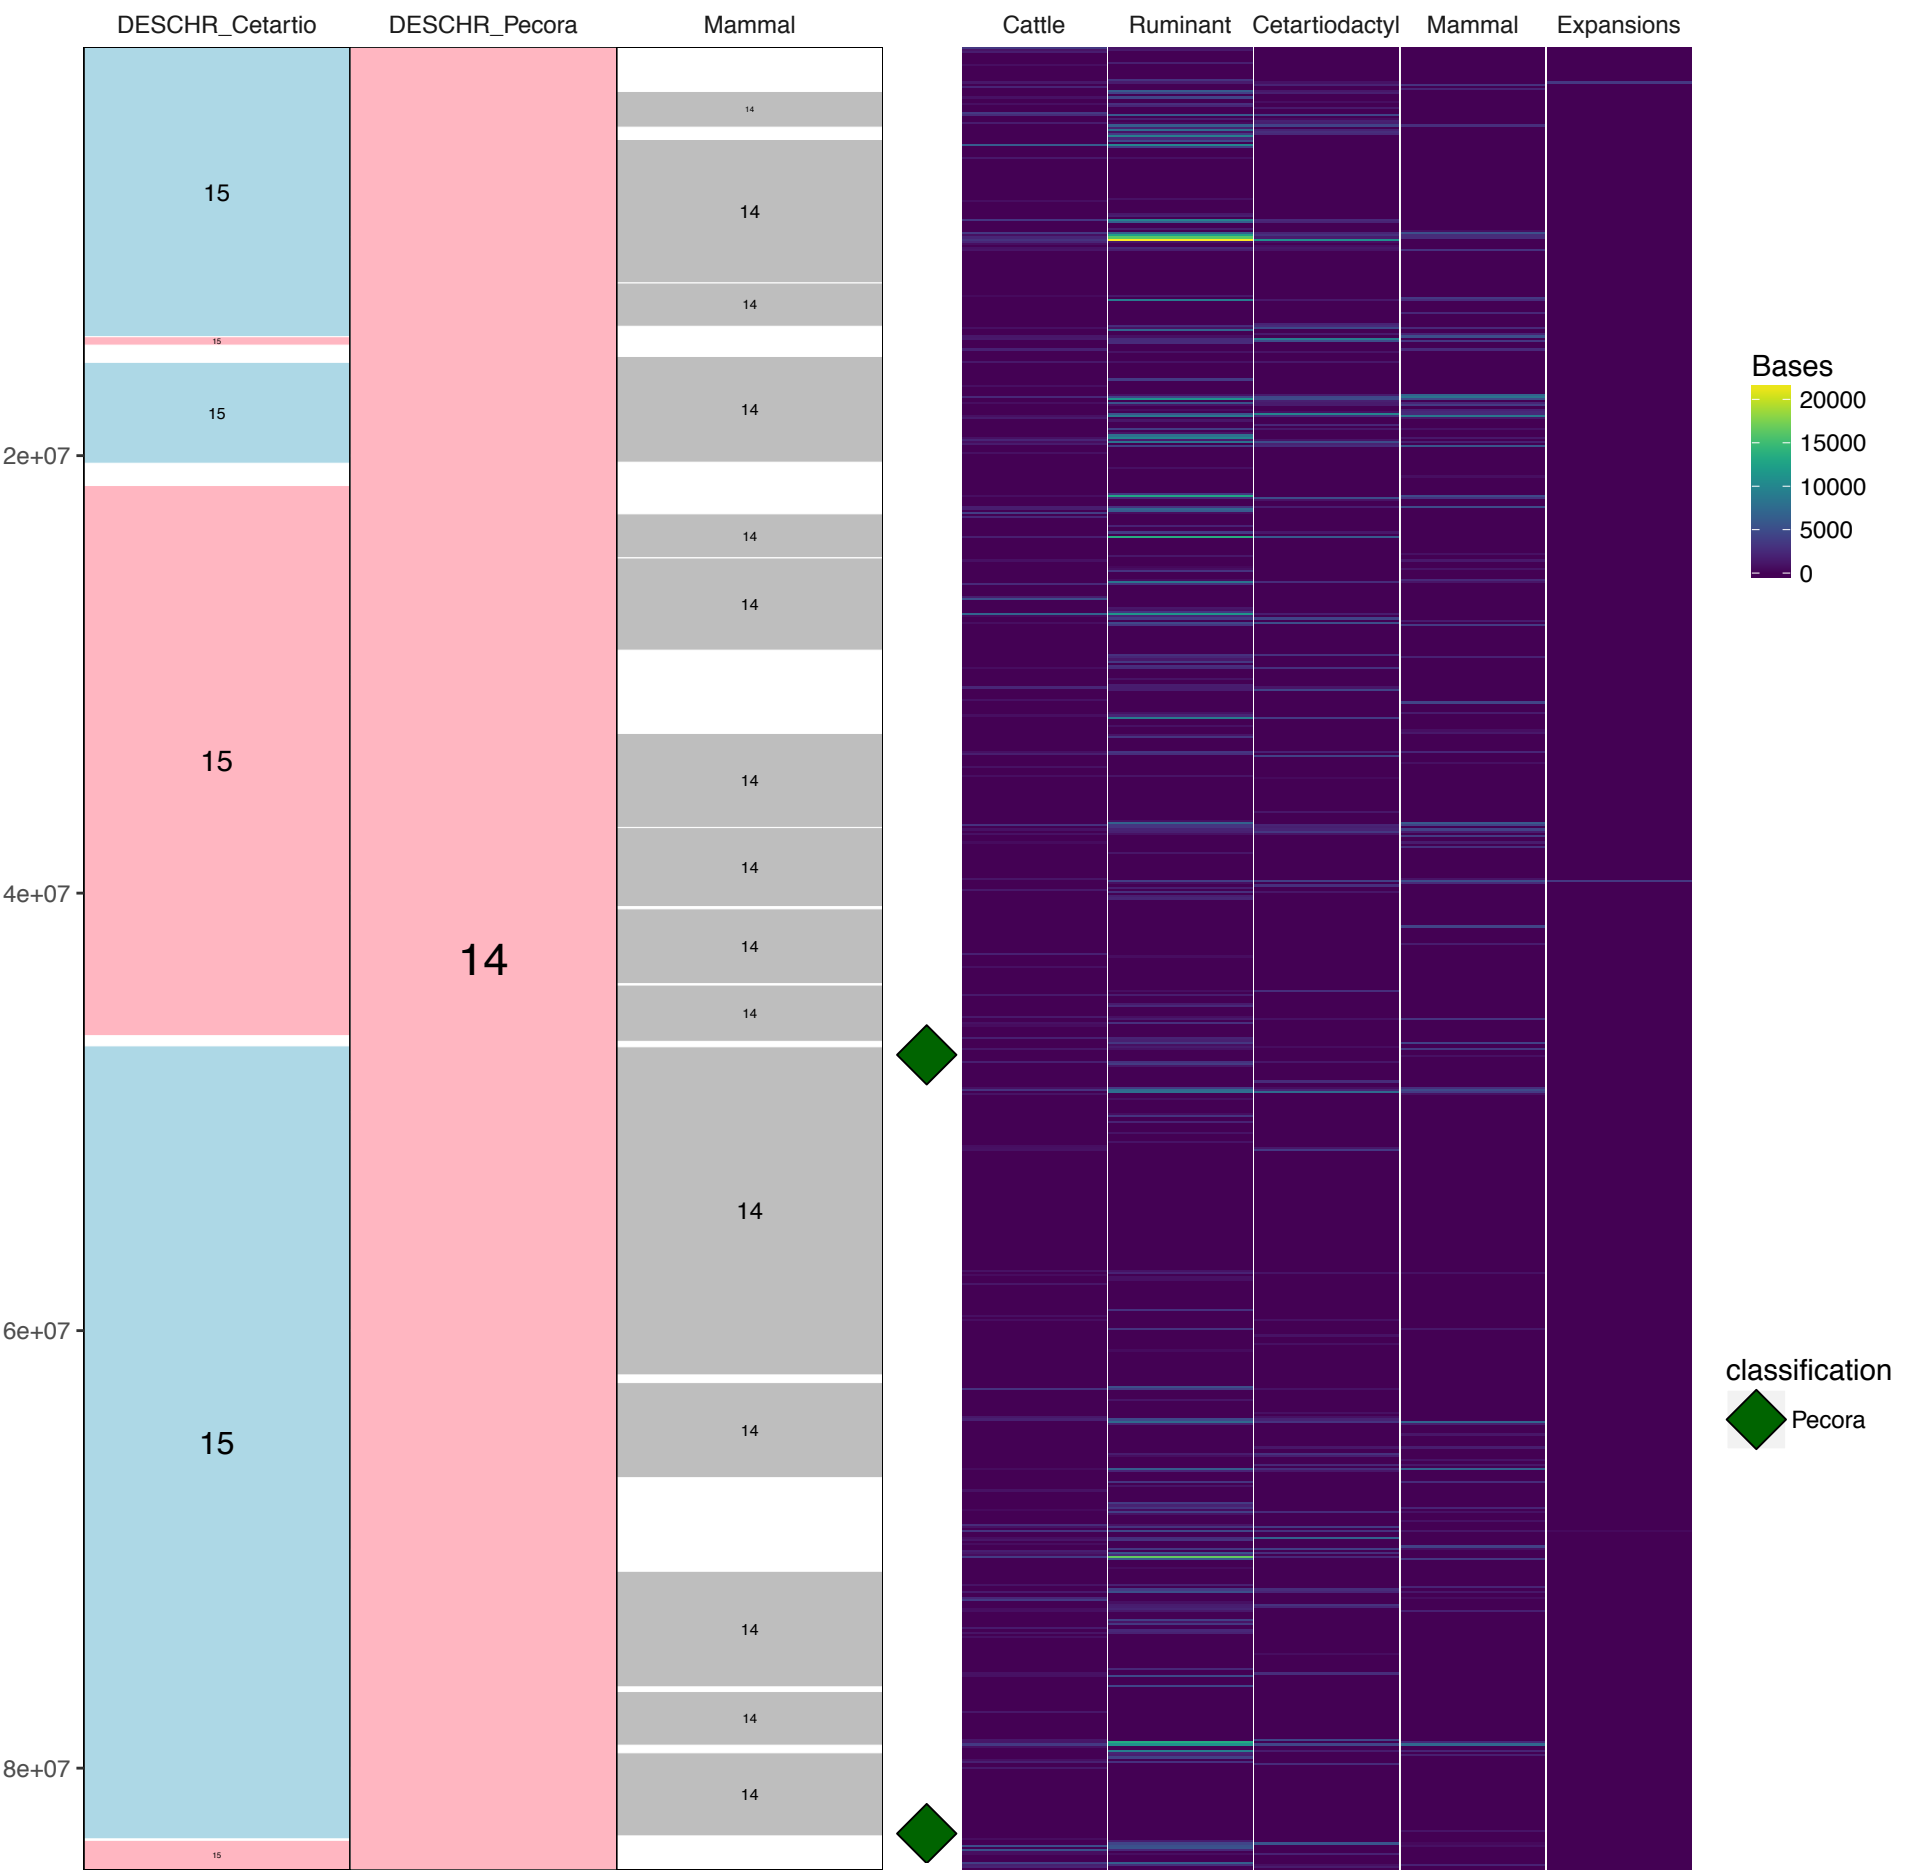

# Cattle chr15

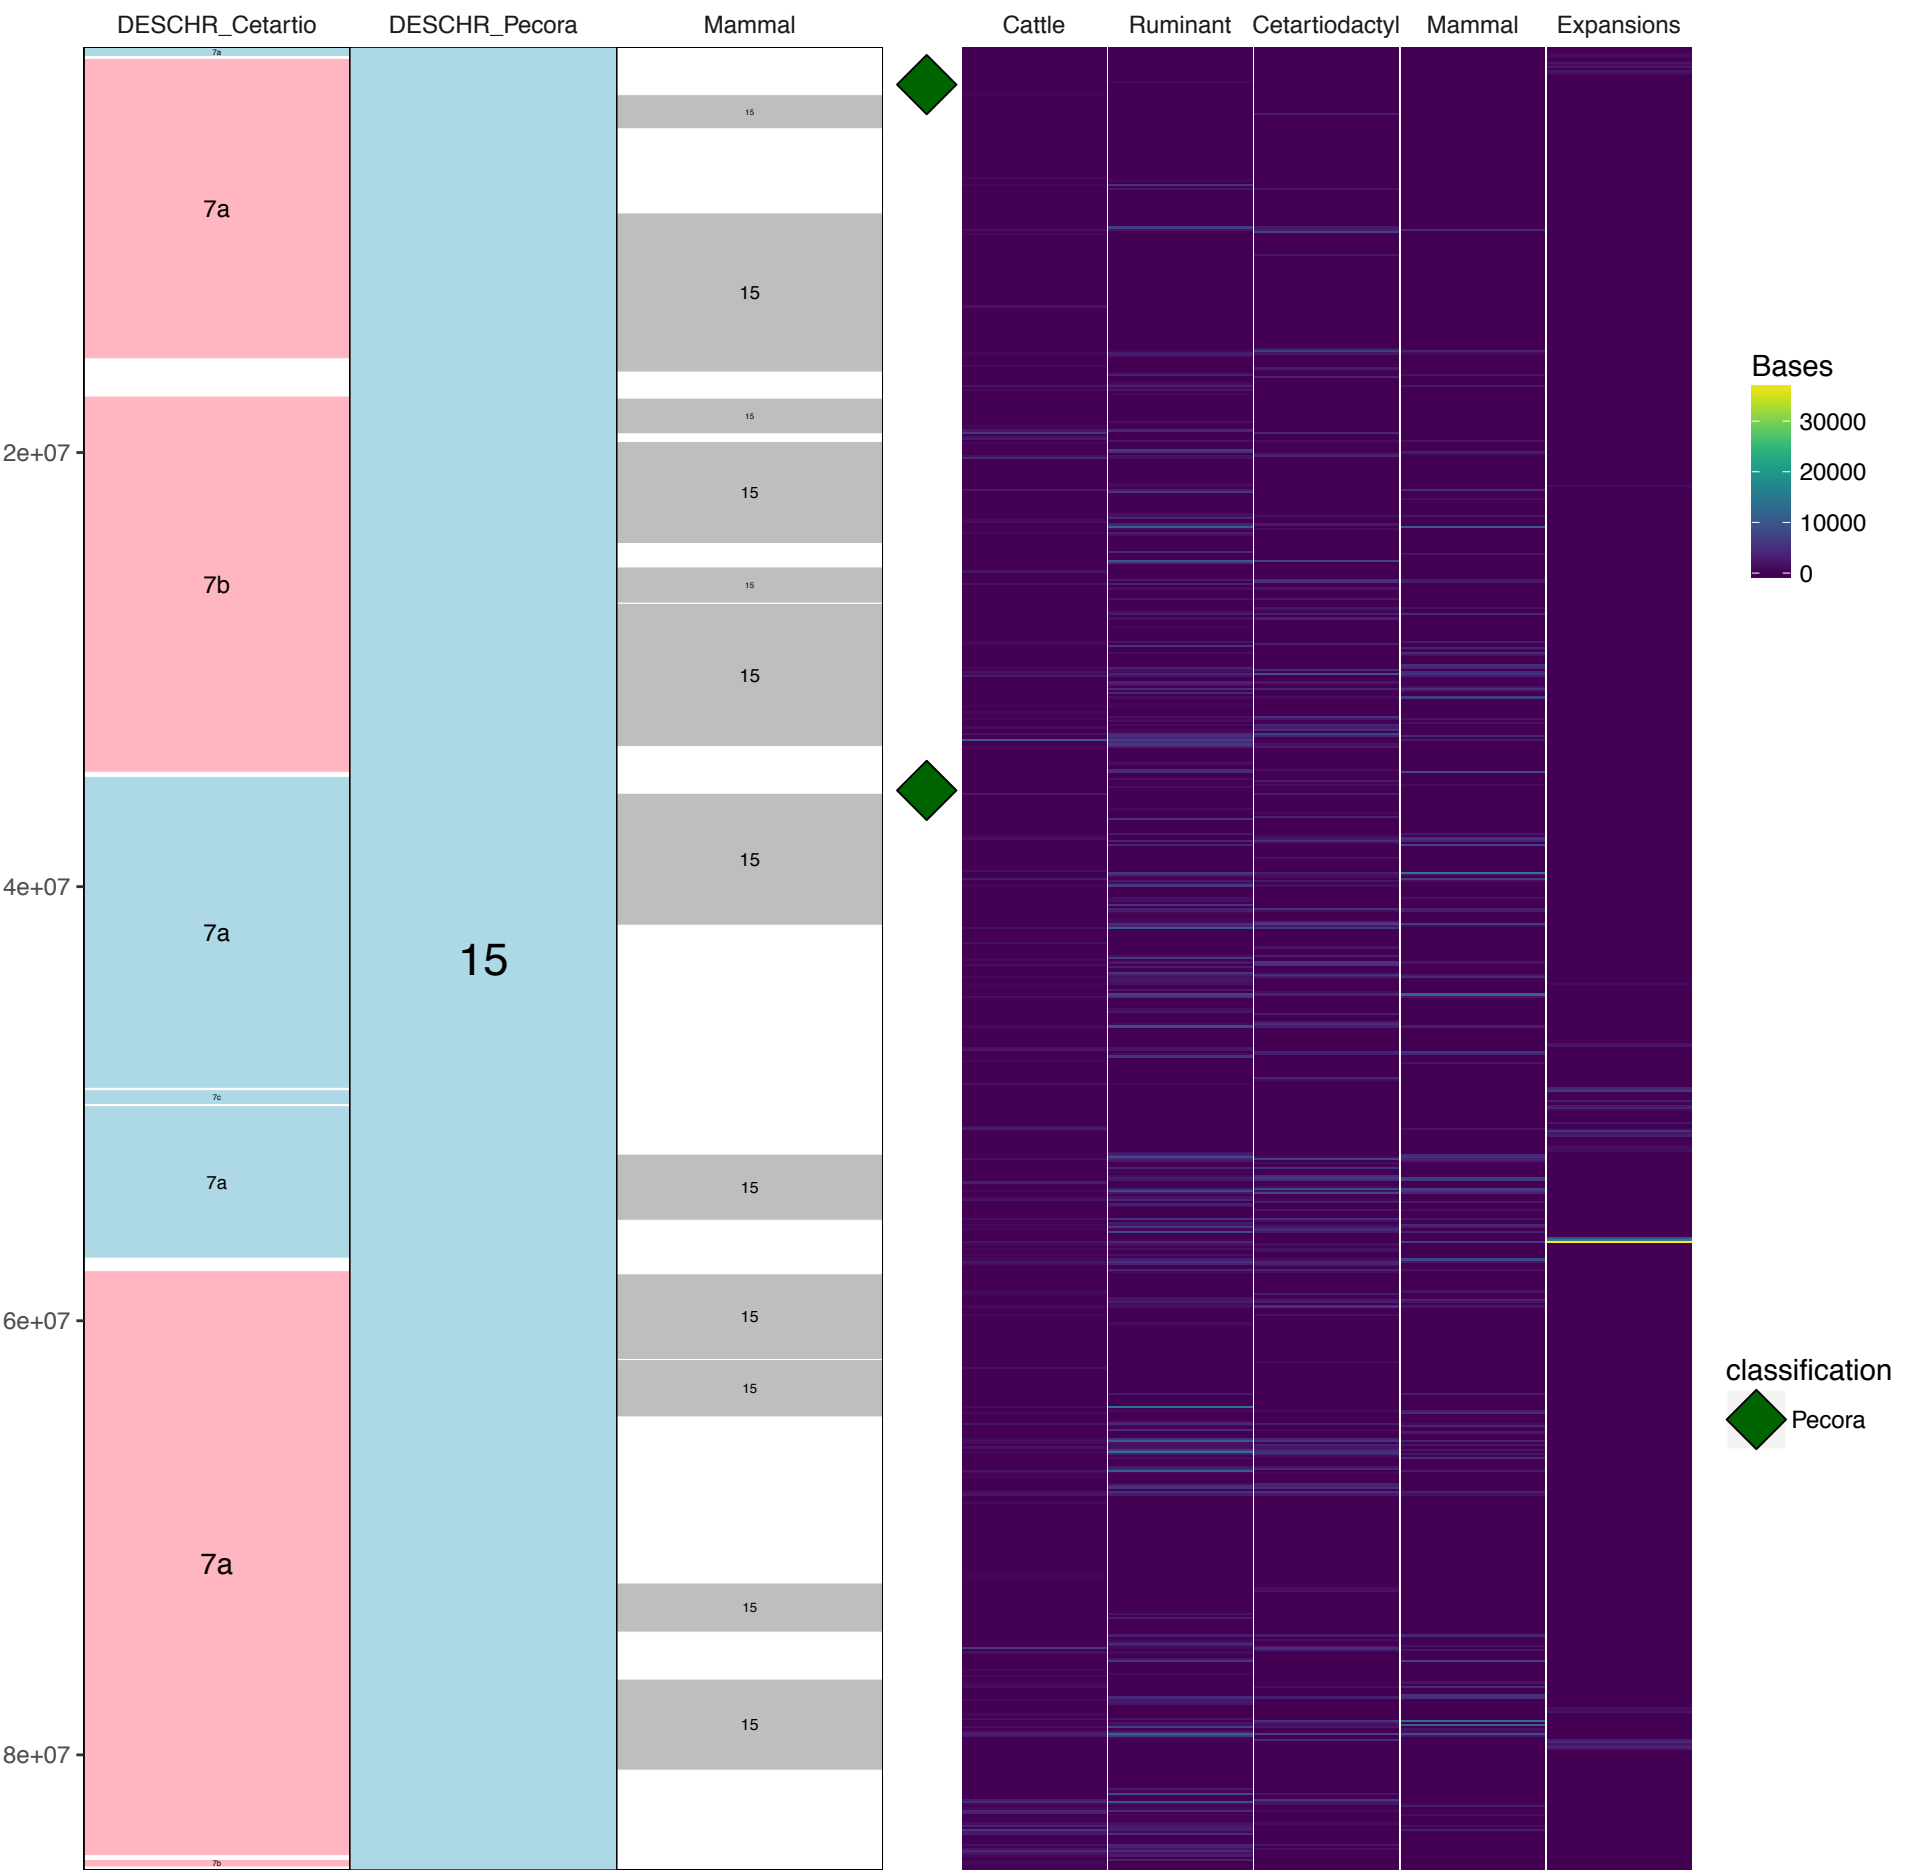



# Cattle chr16

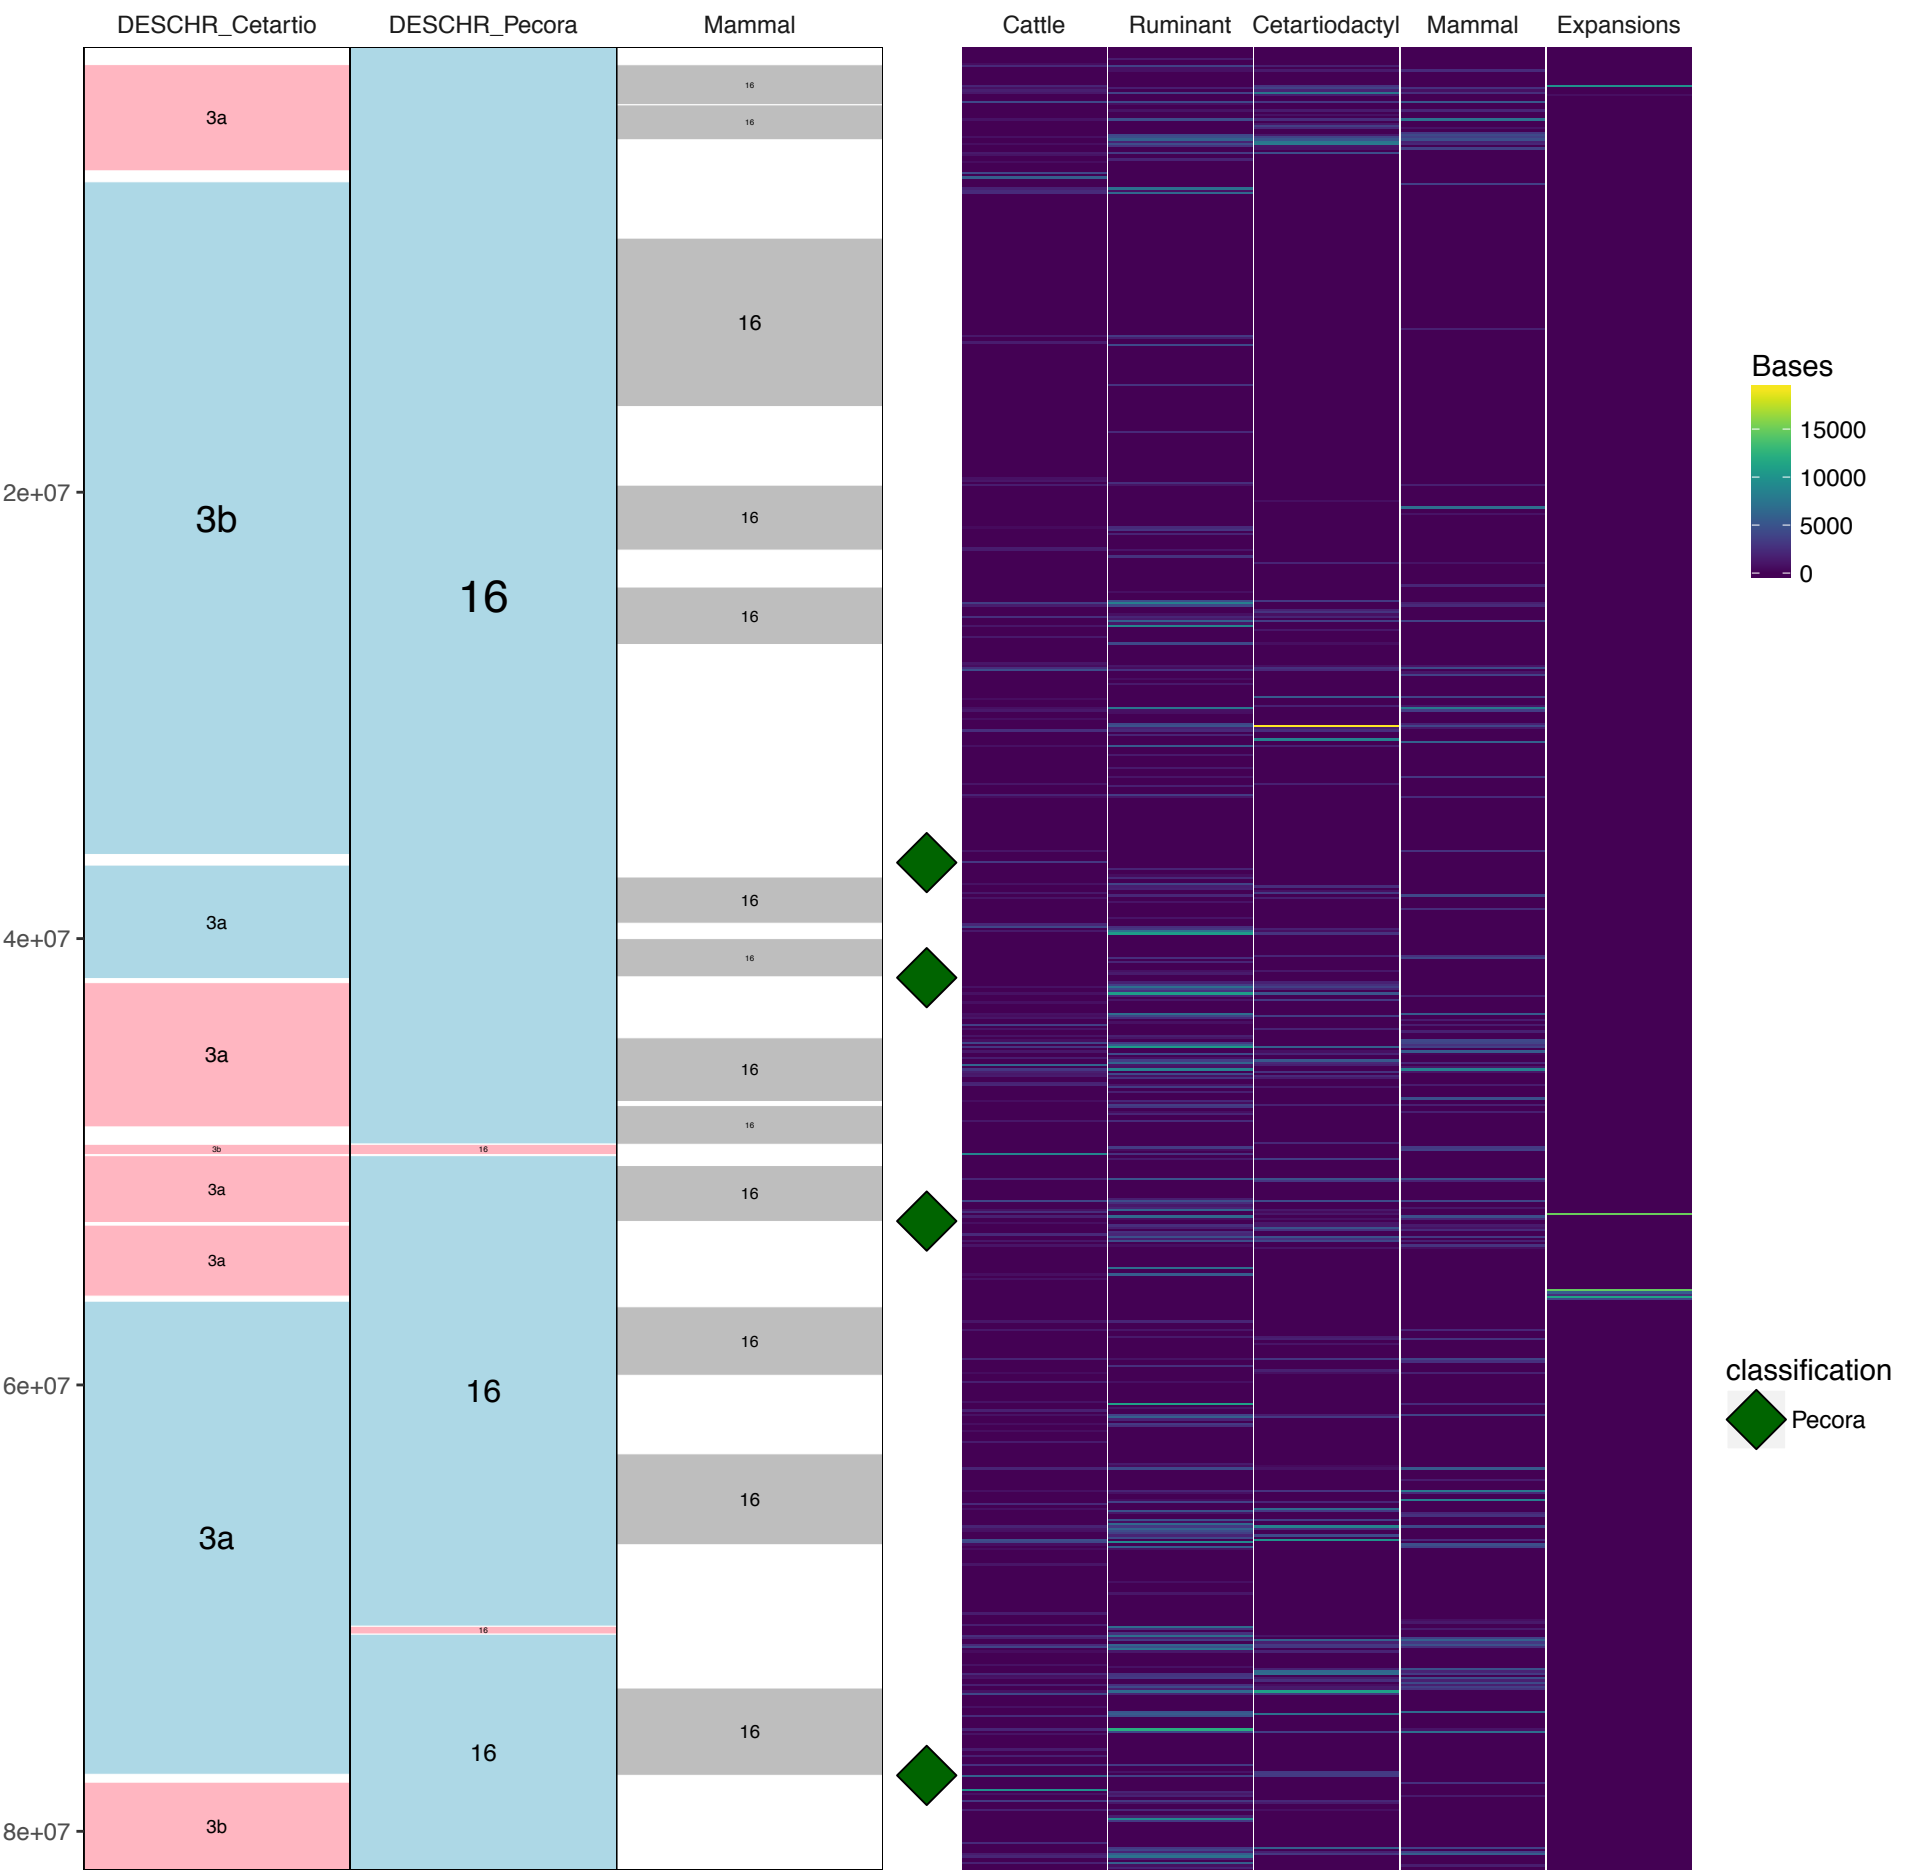

# Cattle chr17

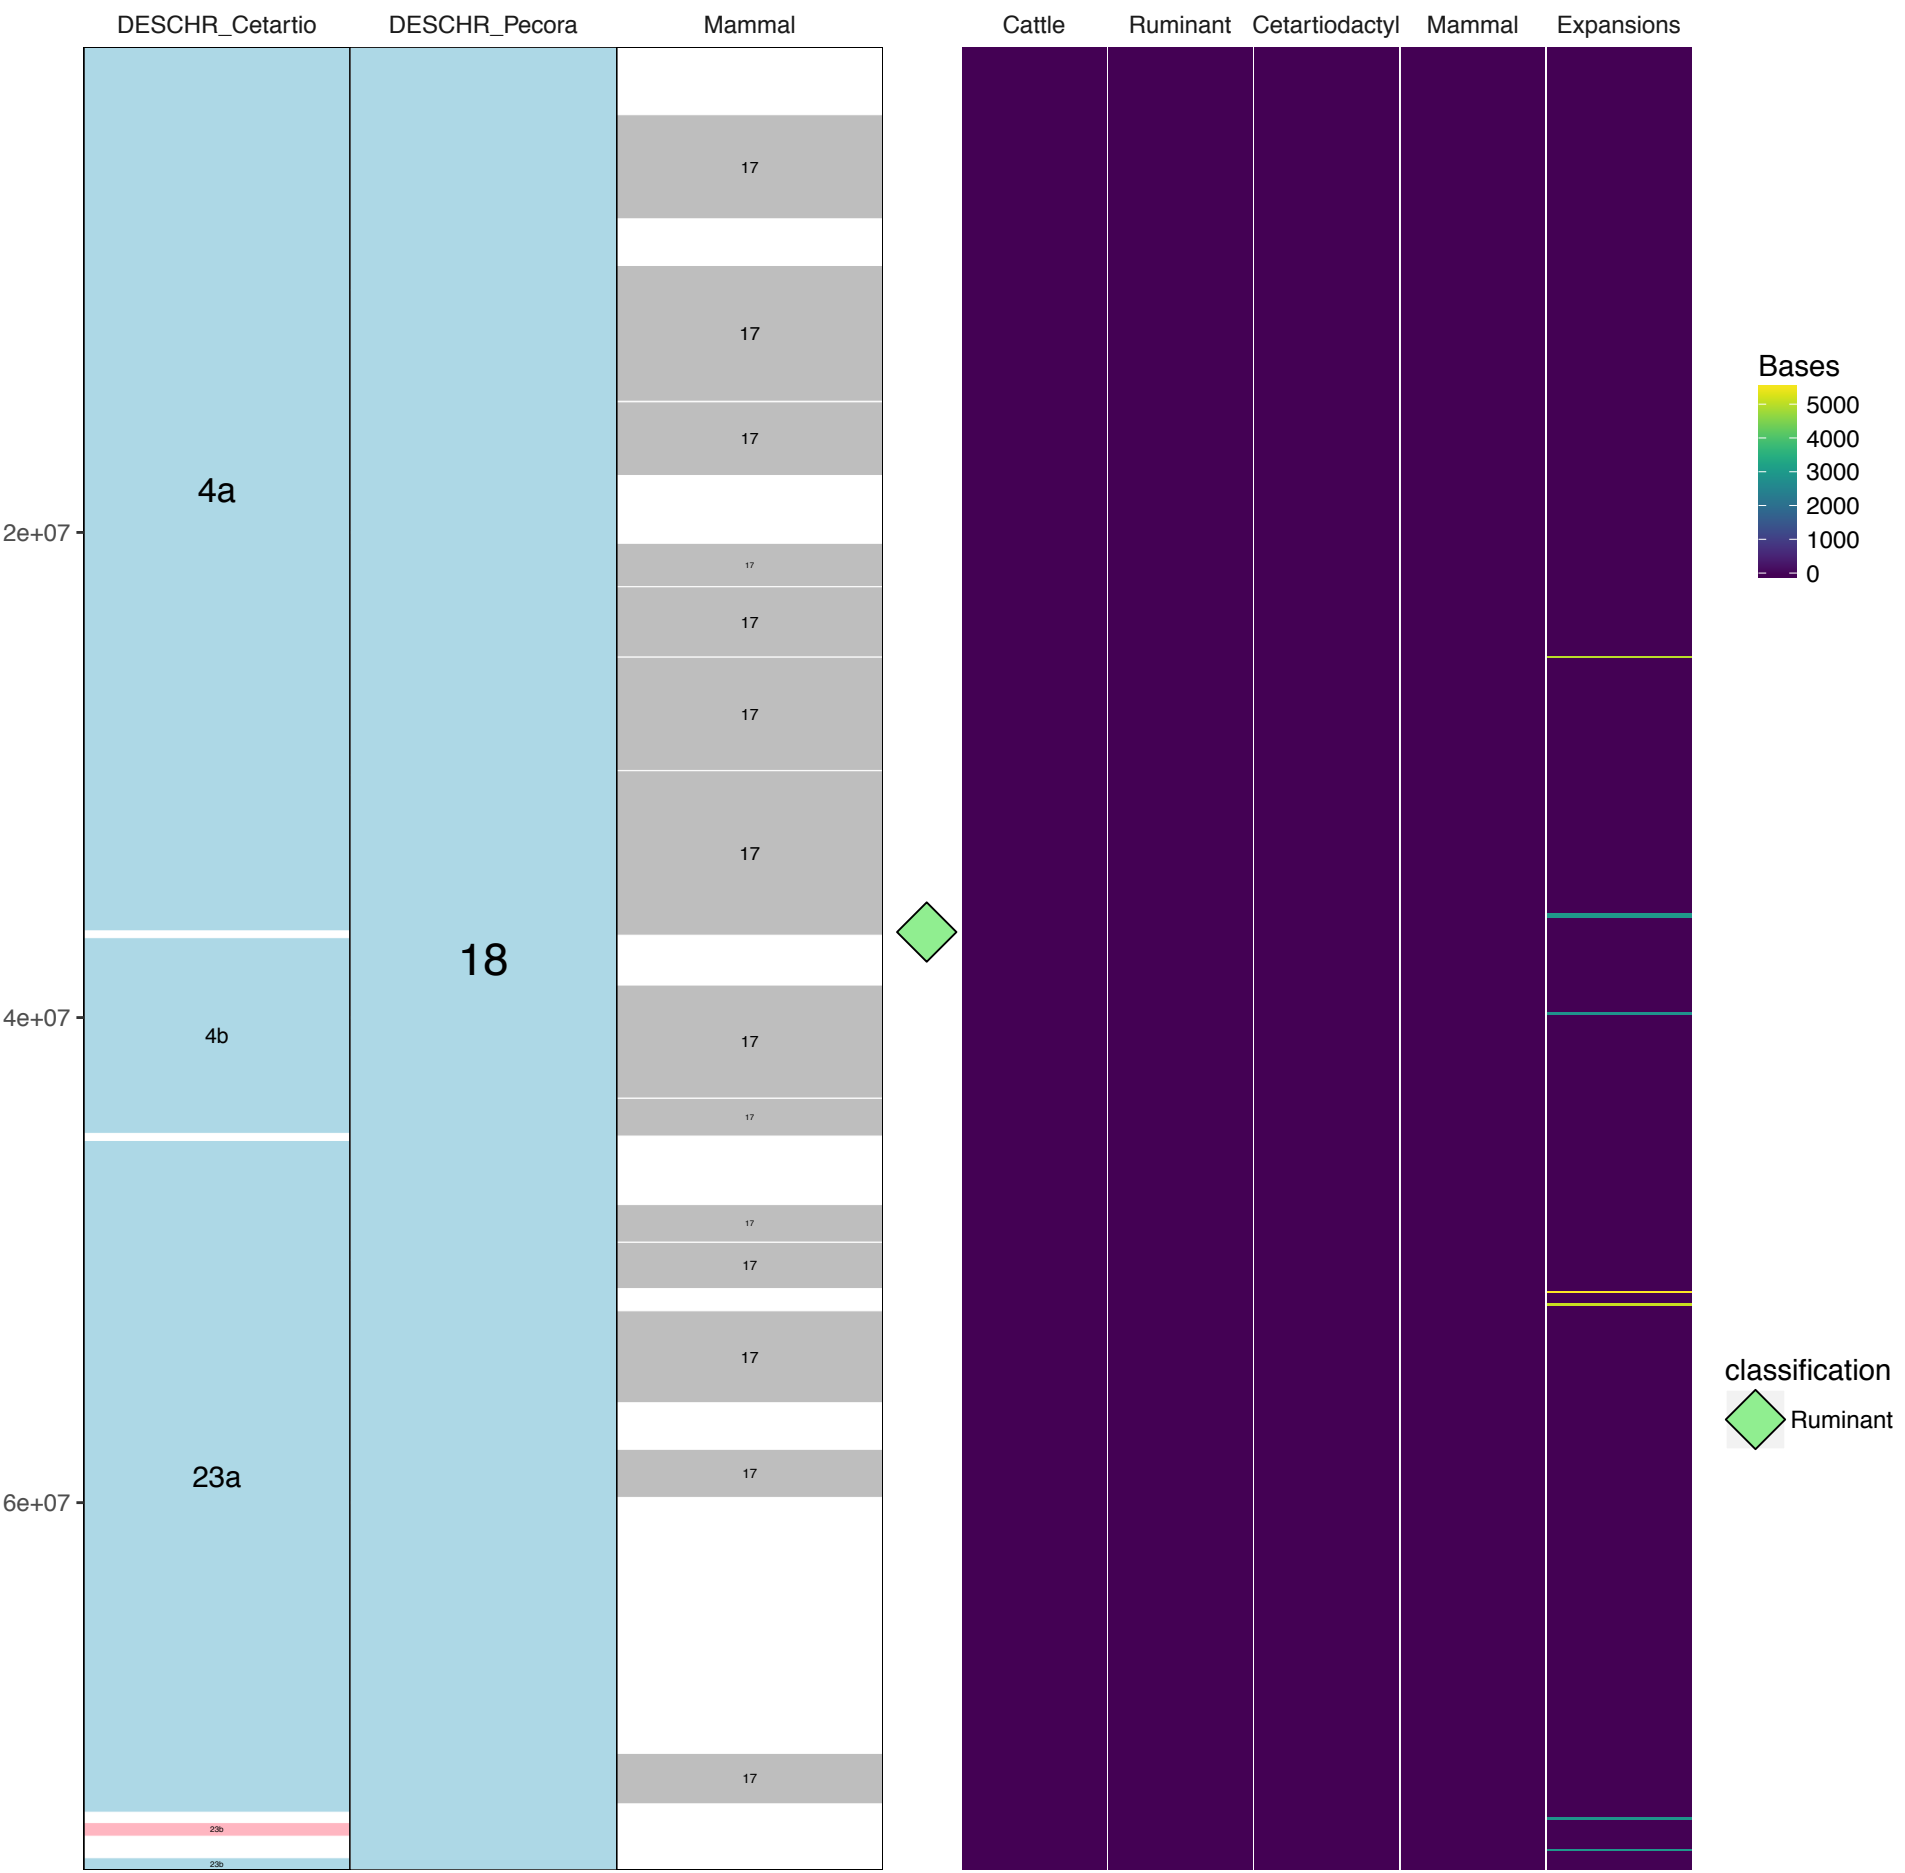

# Cattle chr18

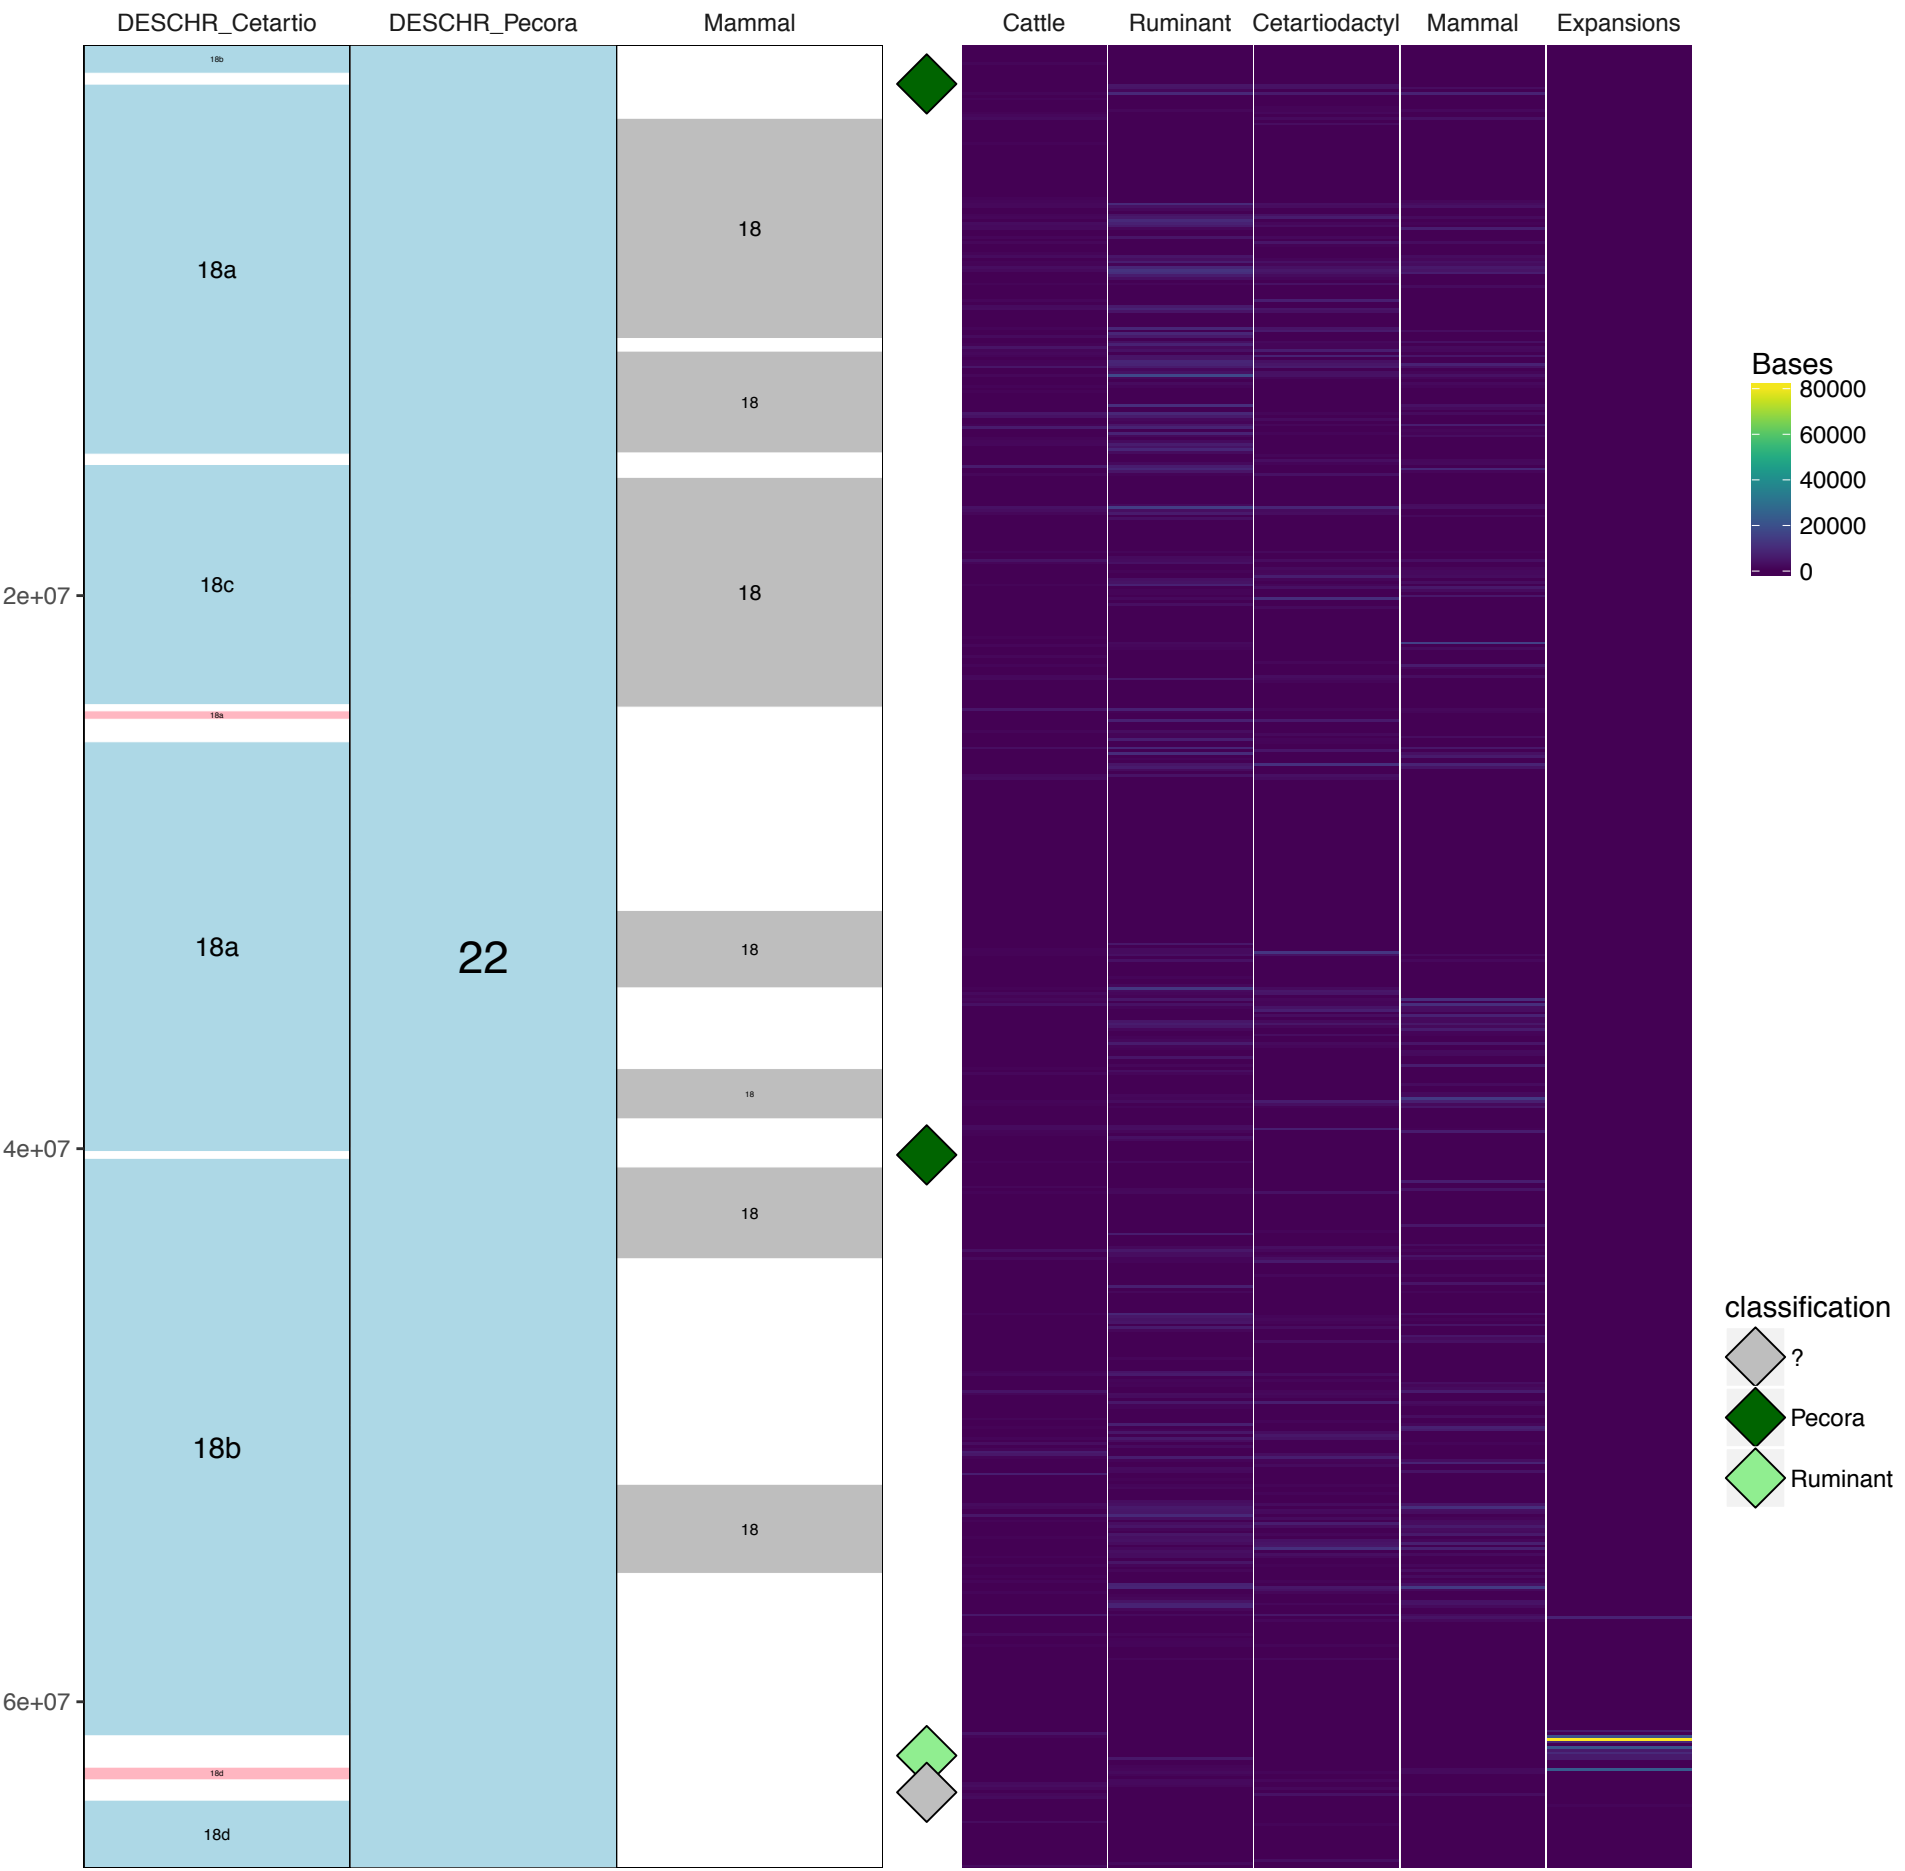

# Cattle chr19

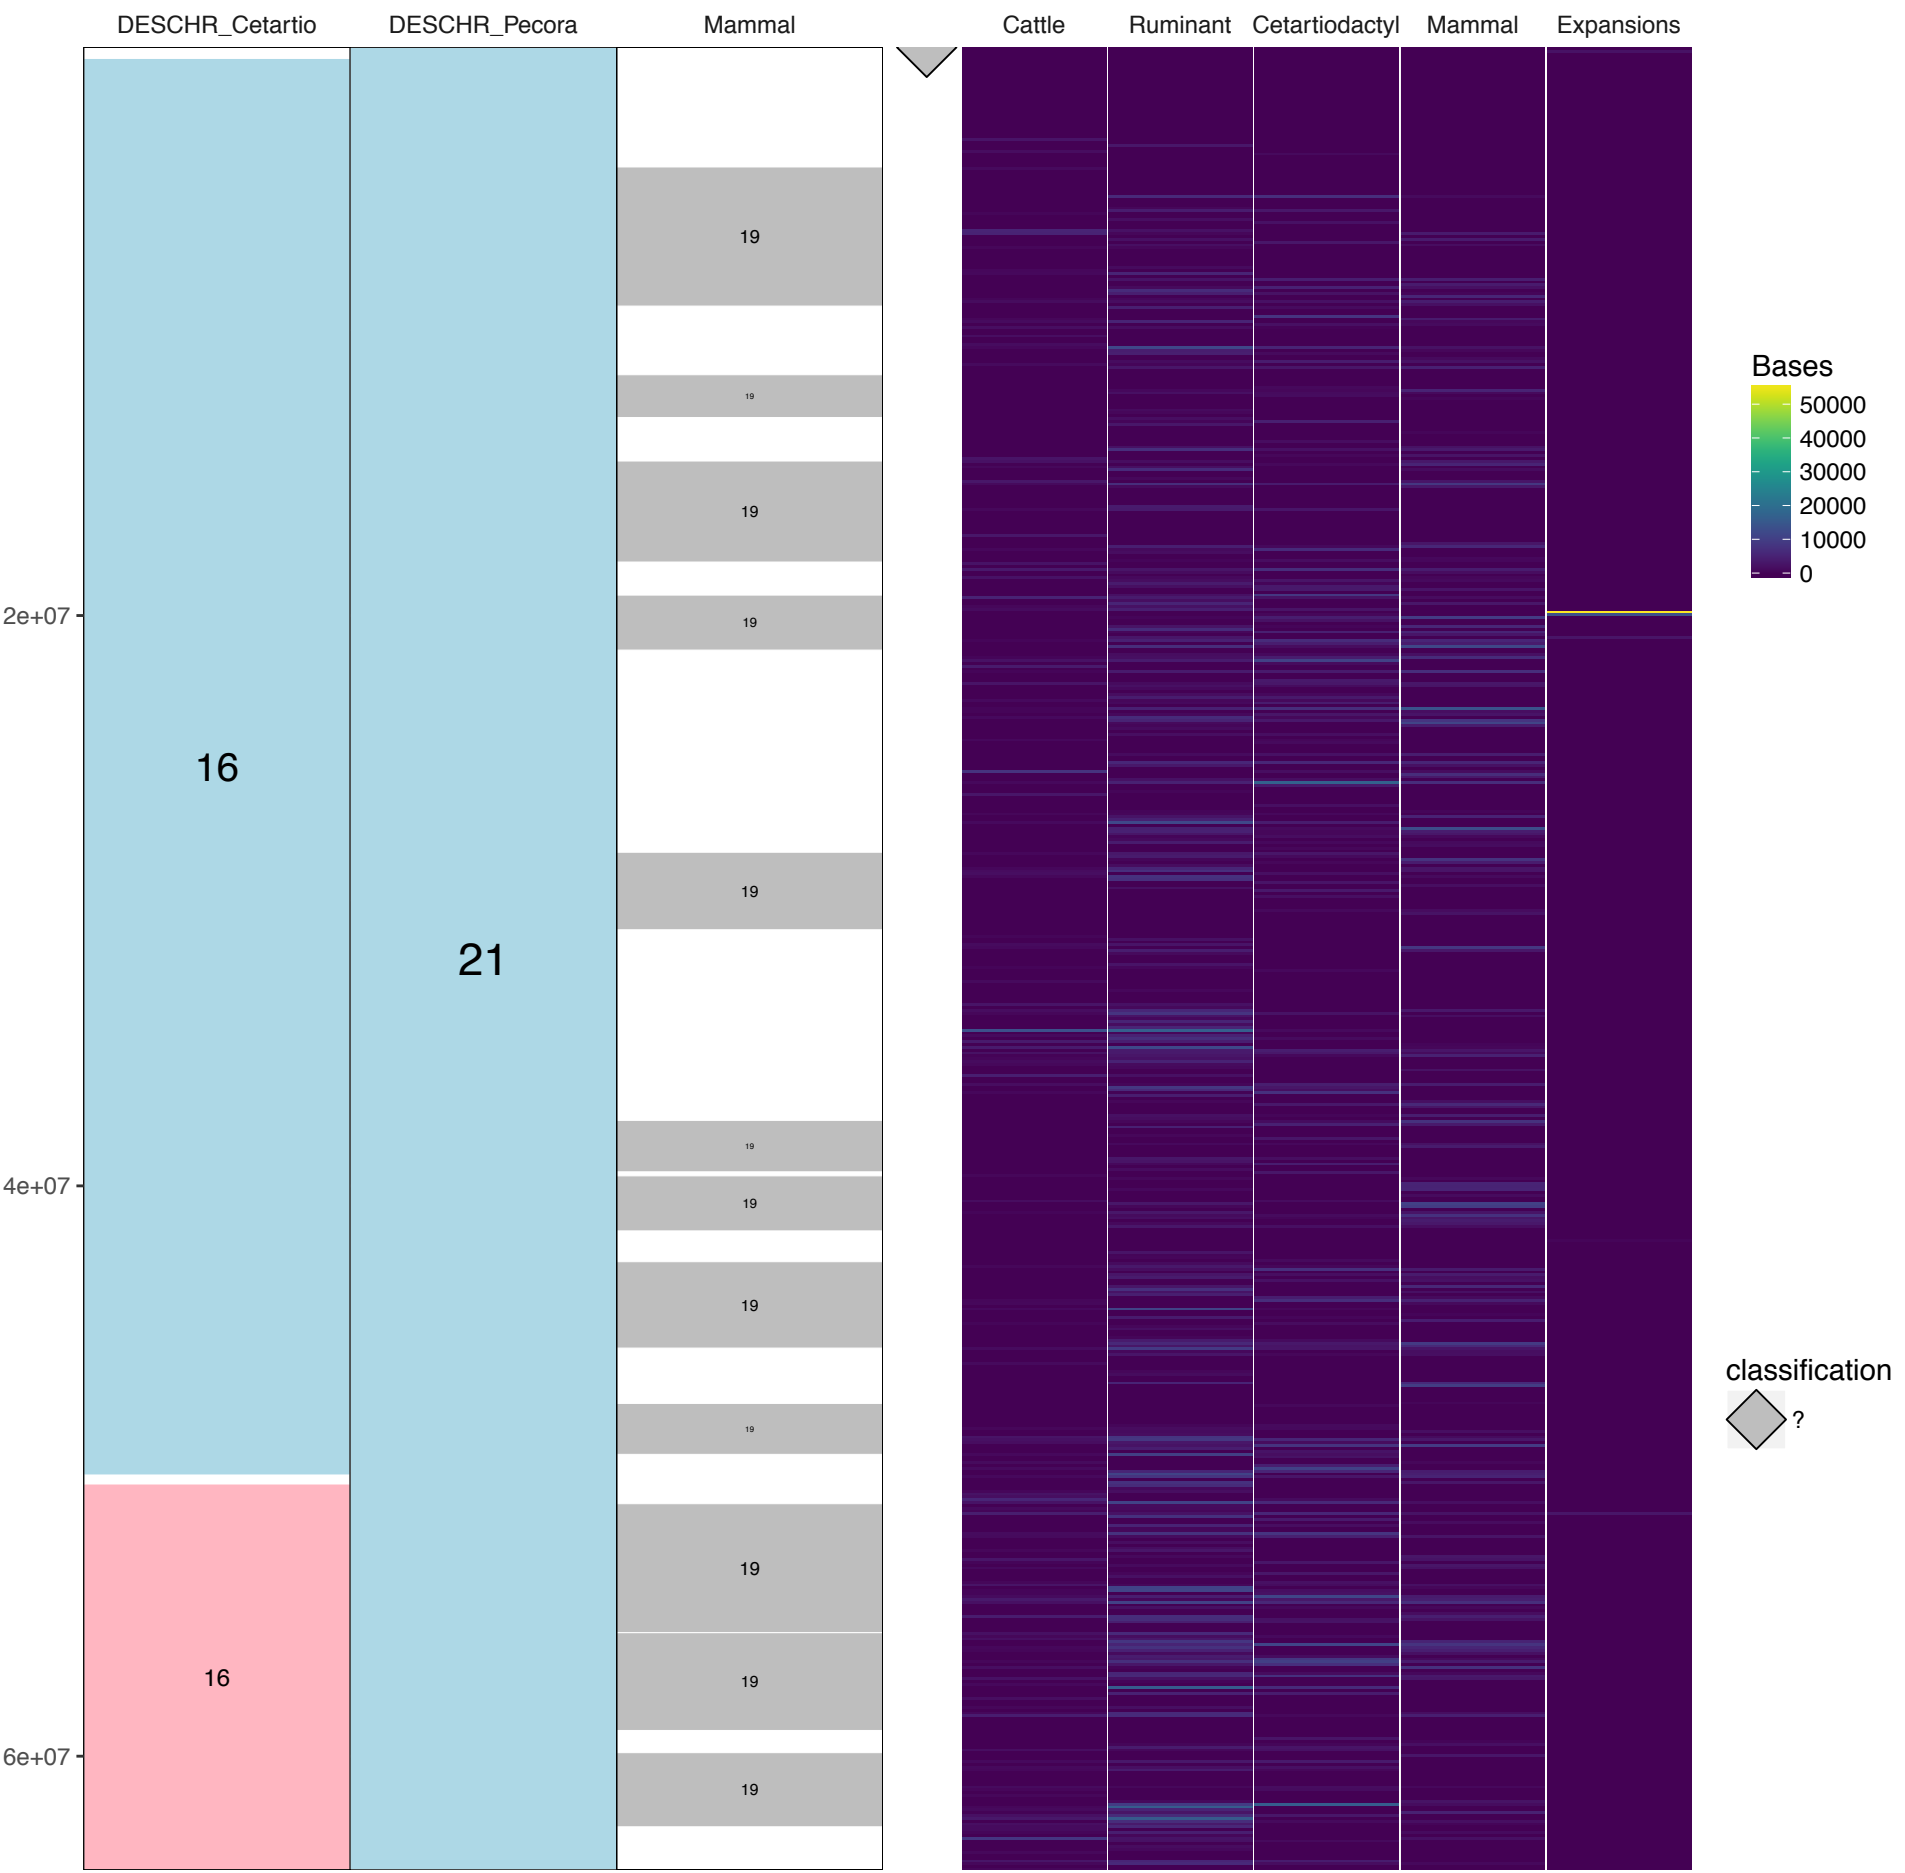

# Cattle chr20

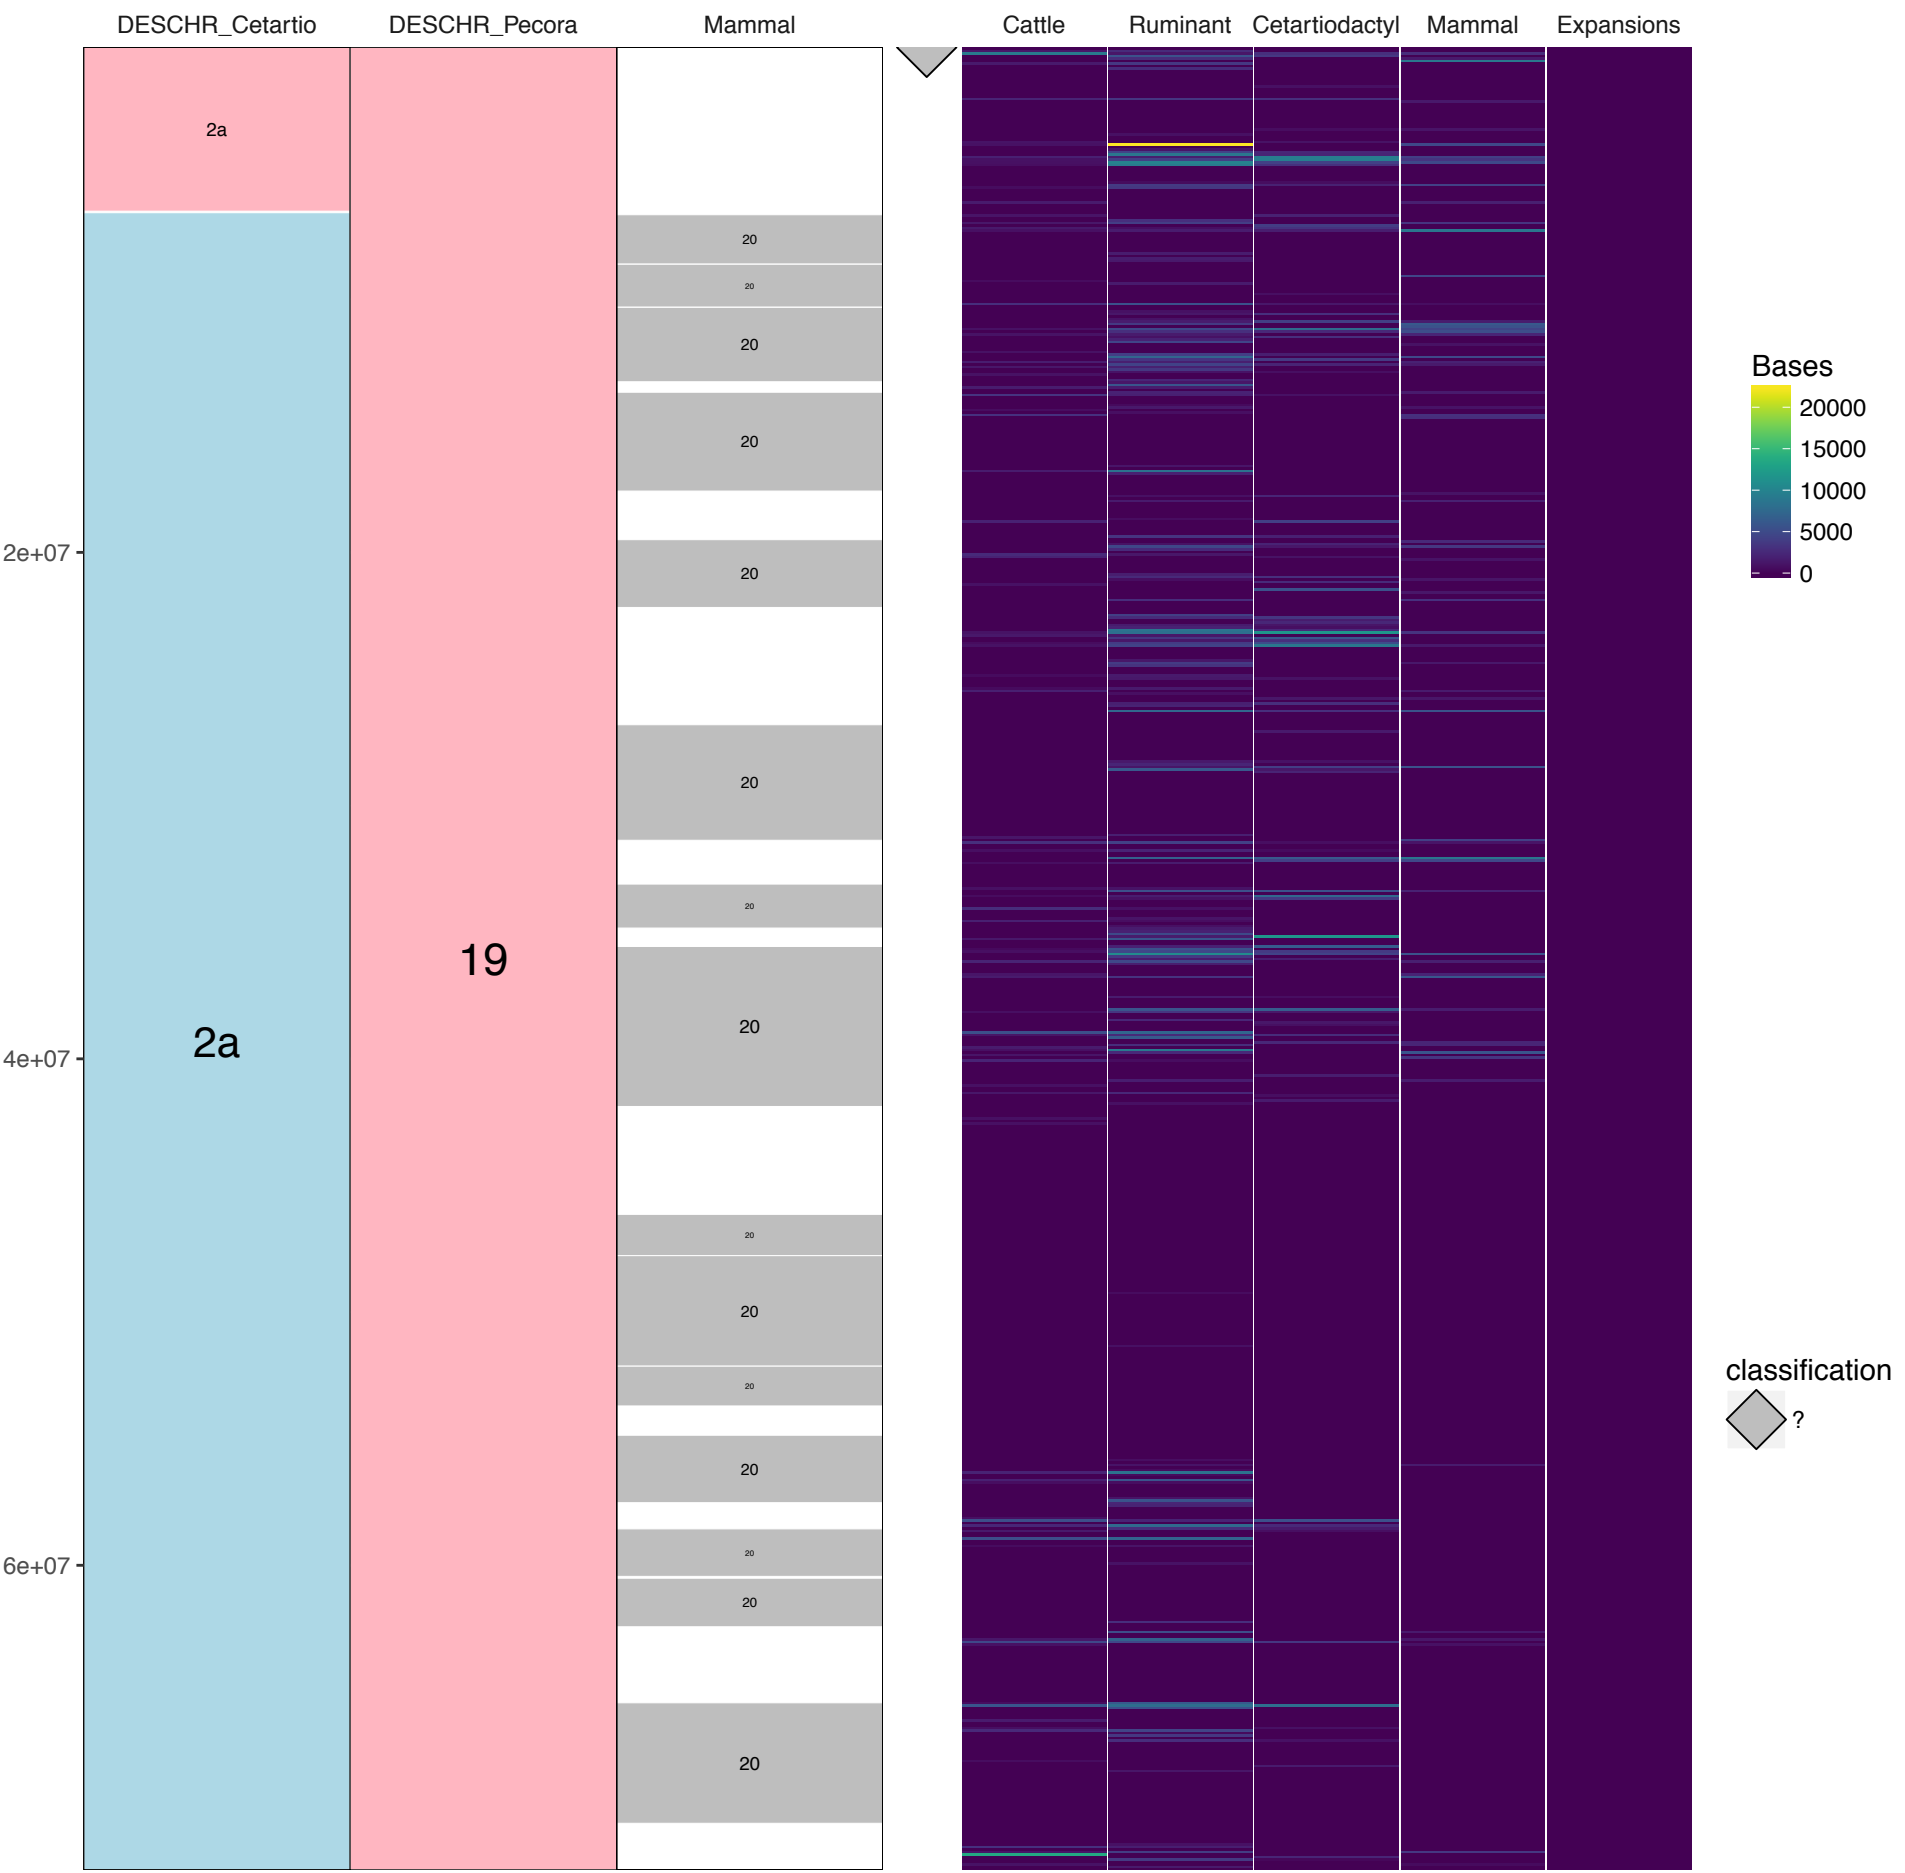

# Cattle chr21

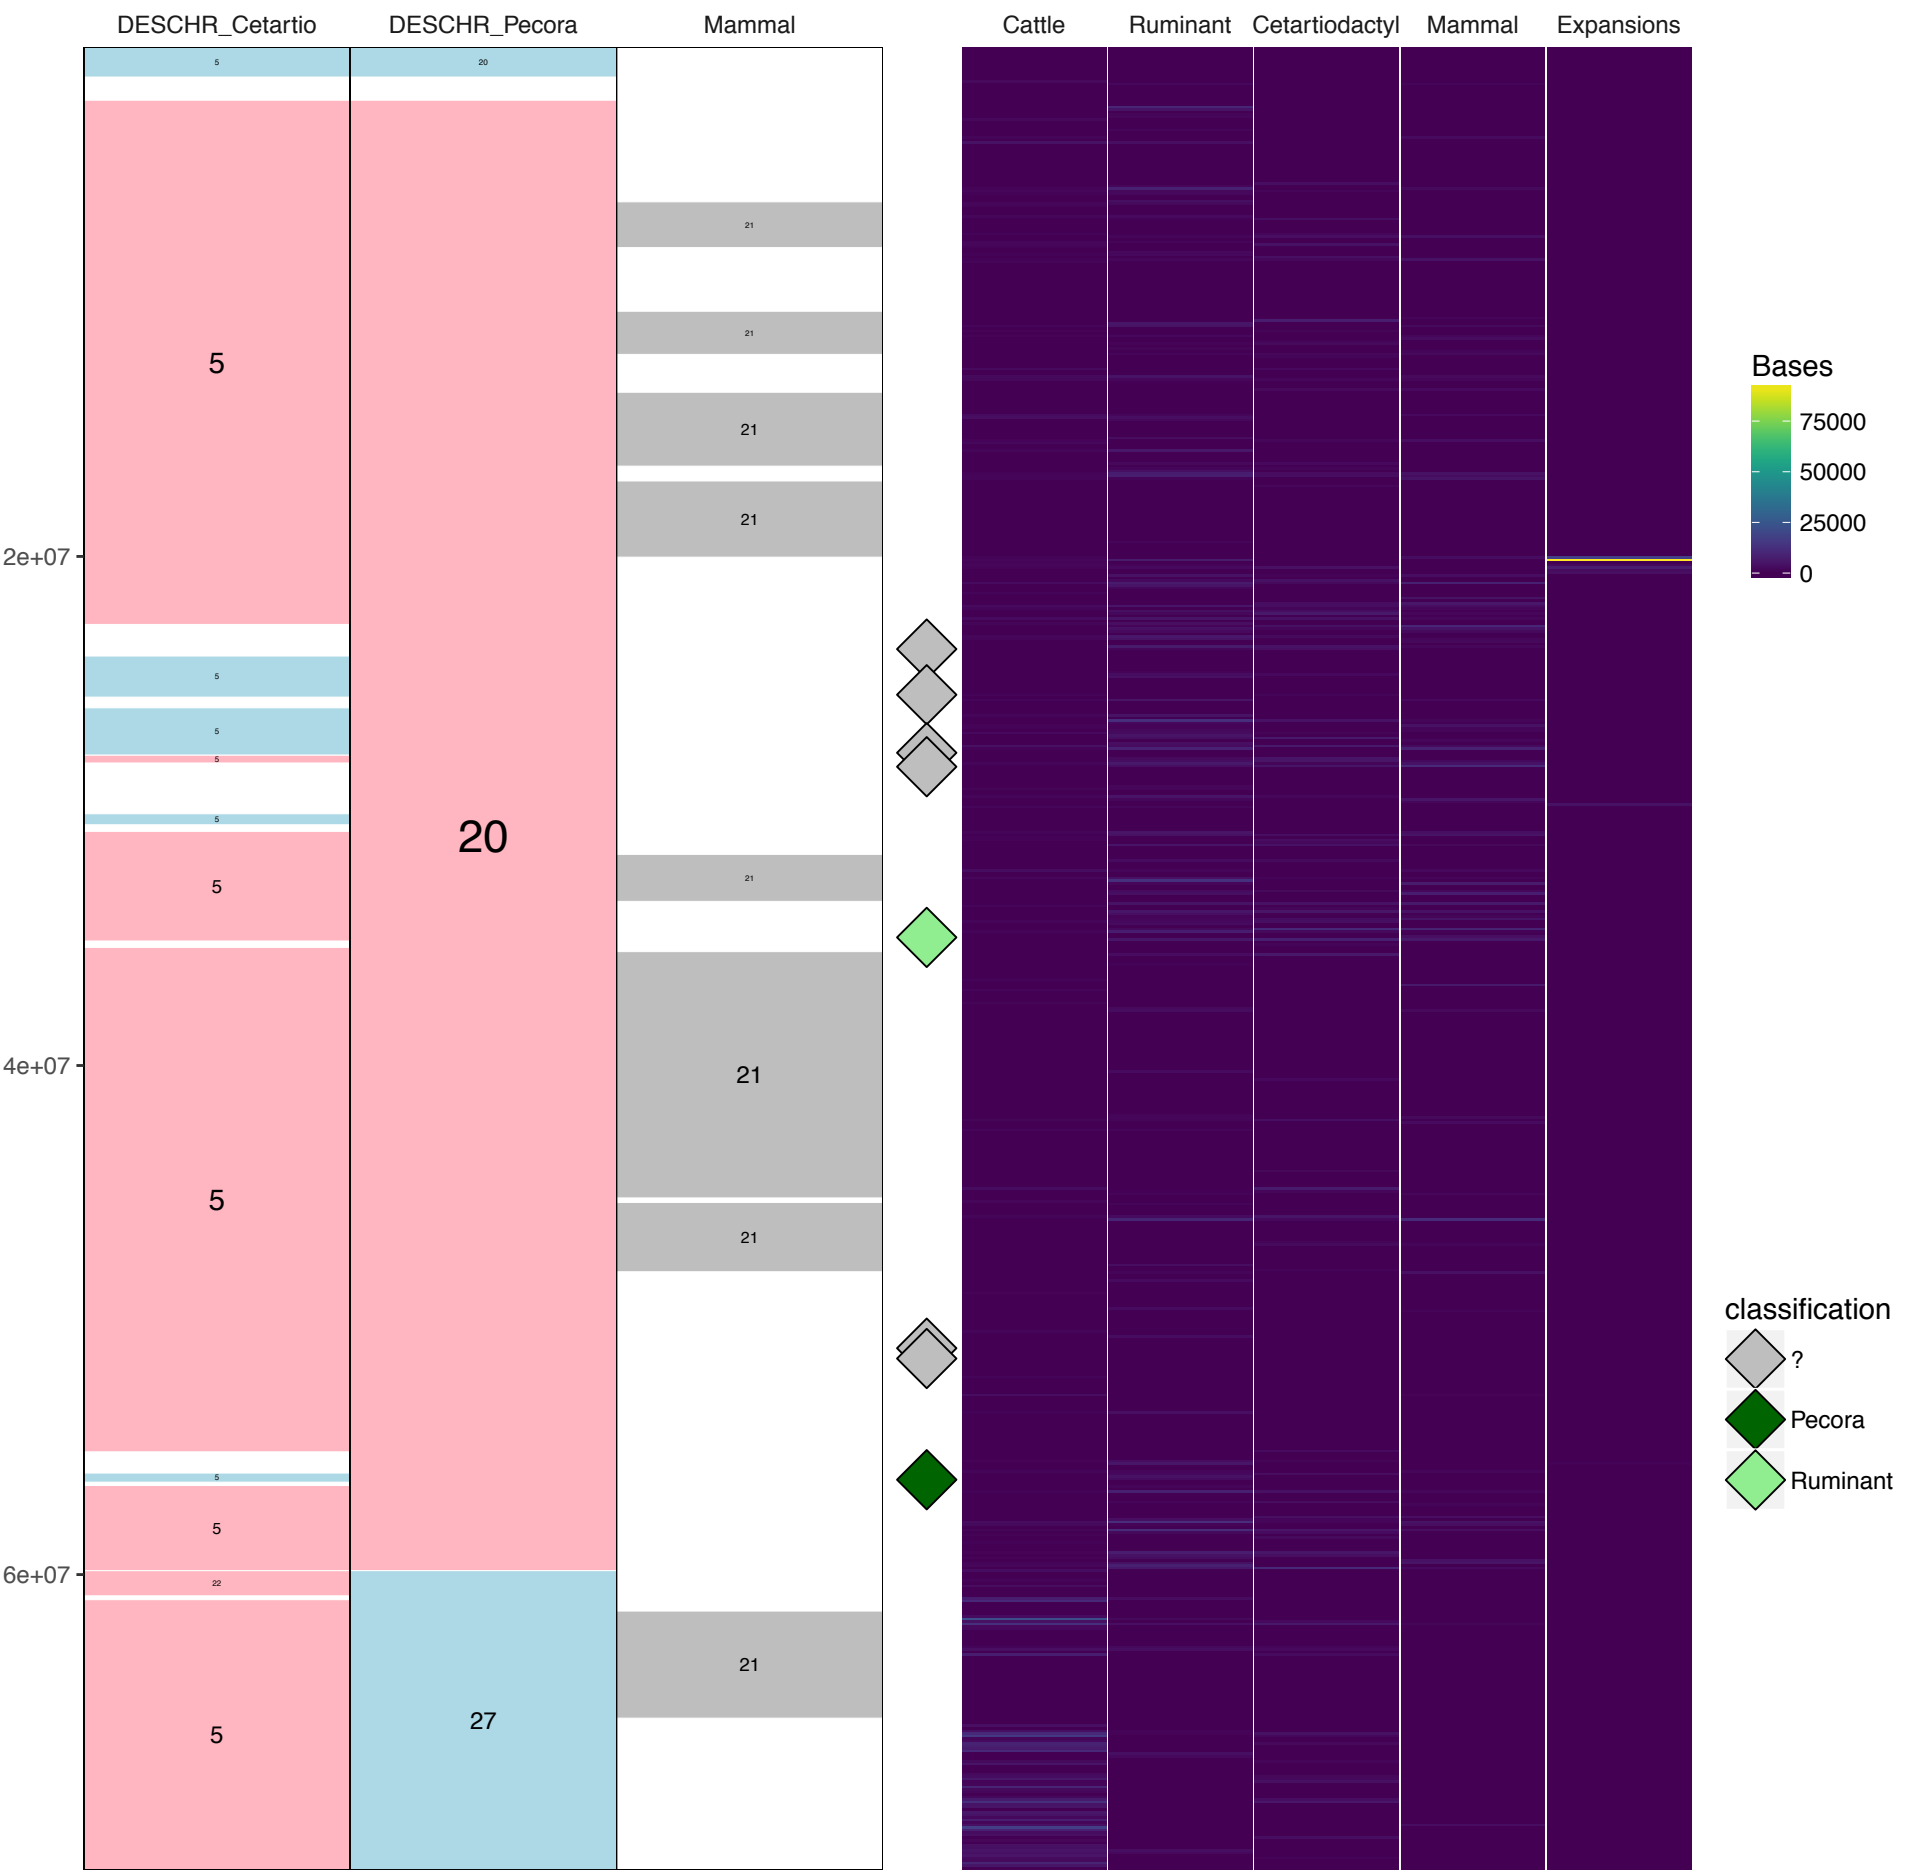

# Cattle chr22

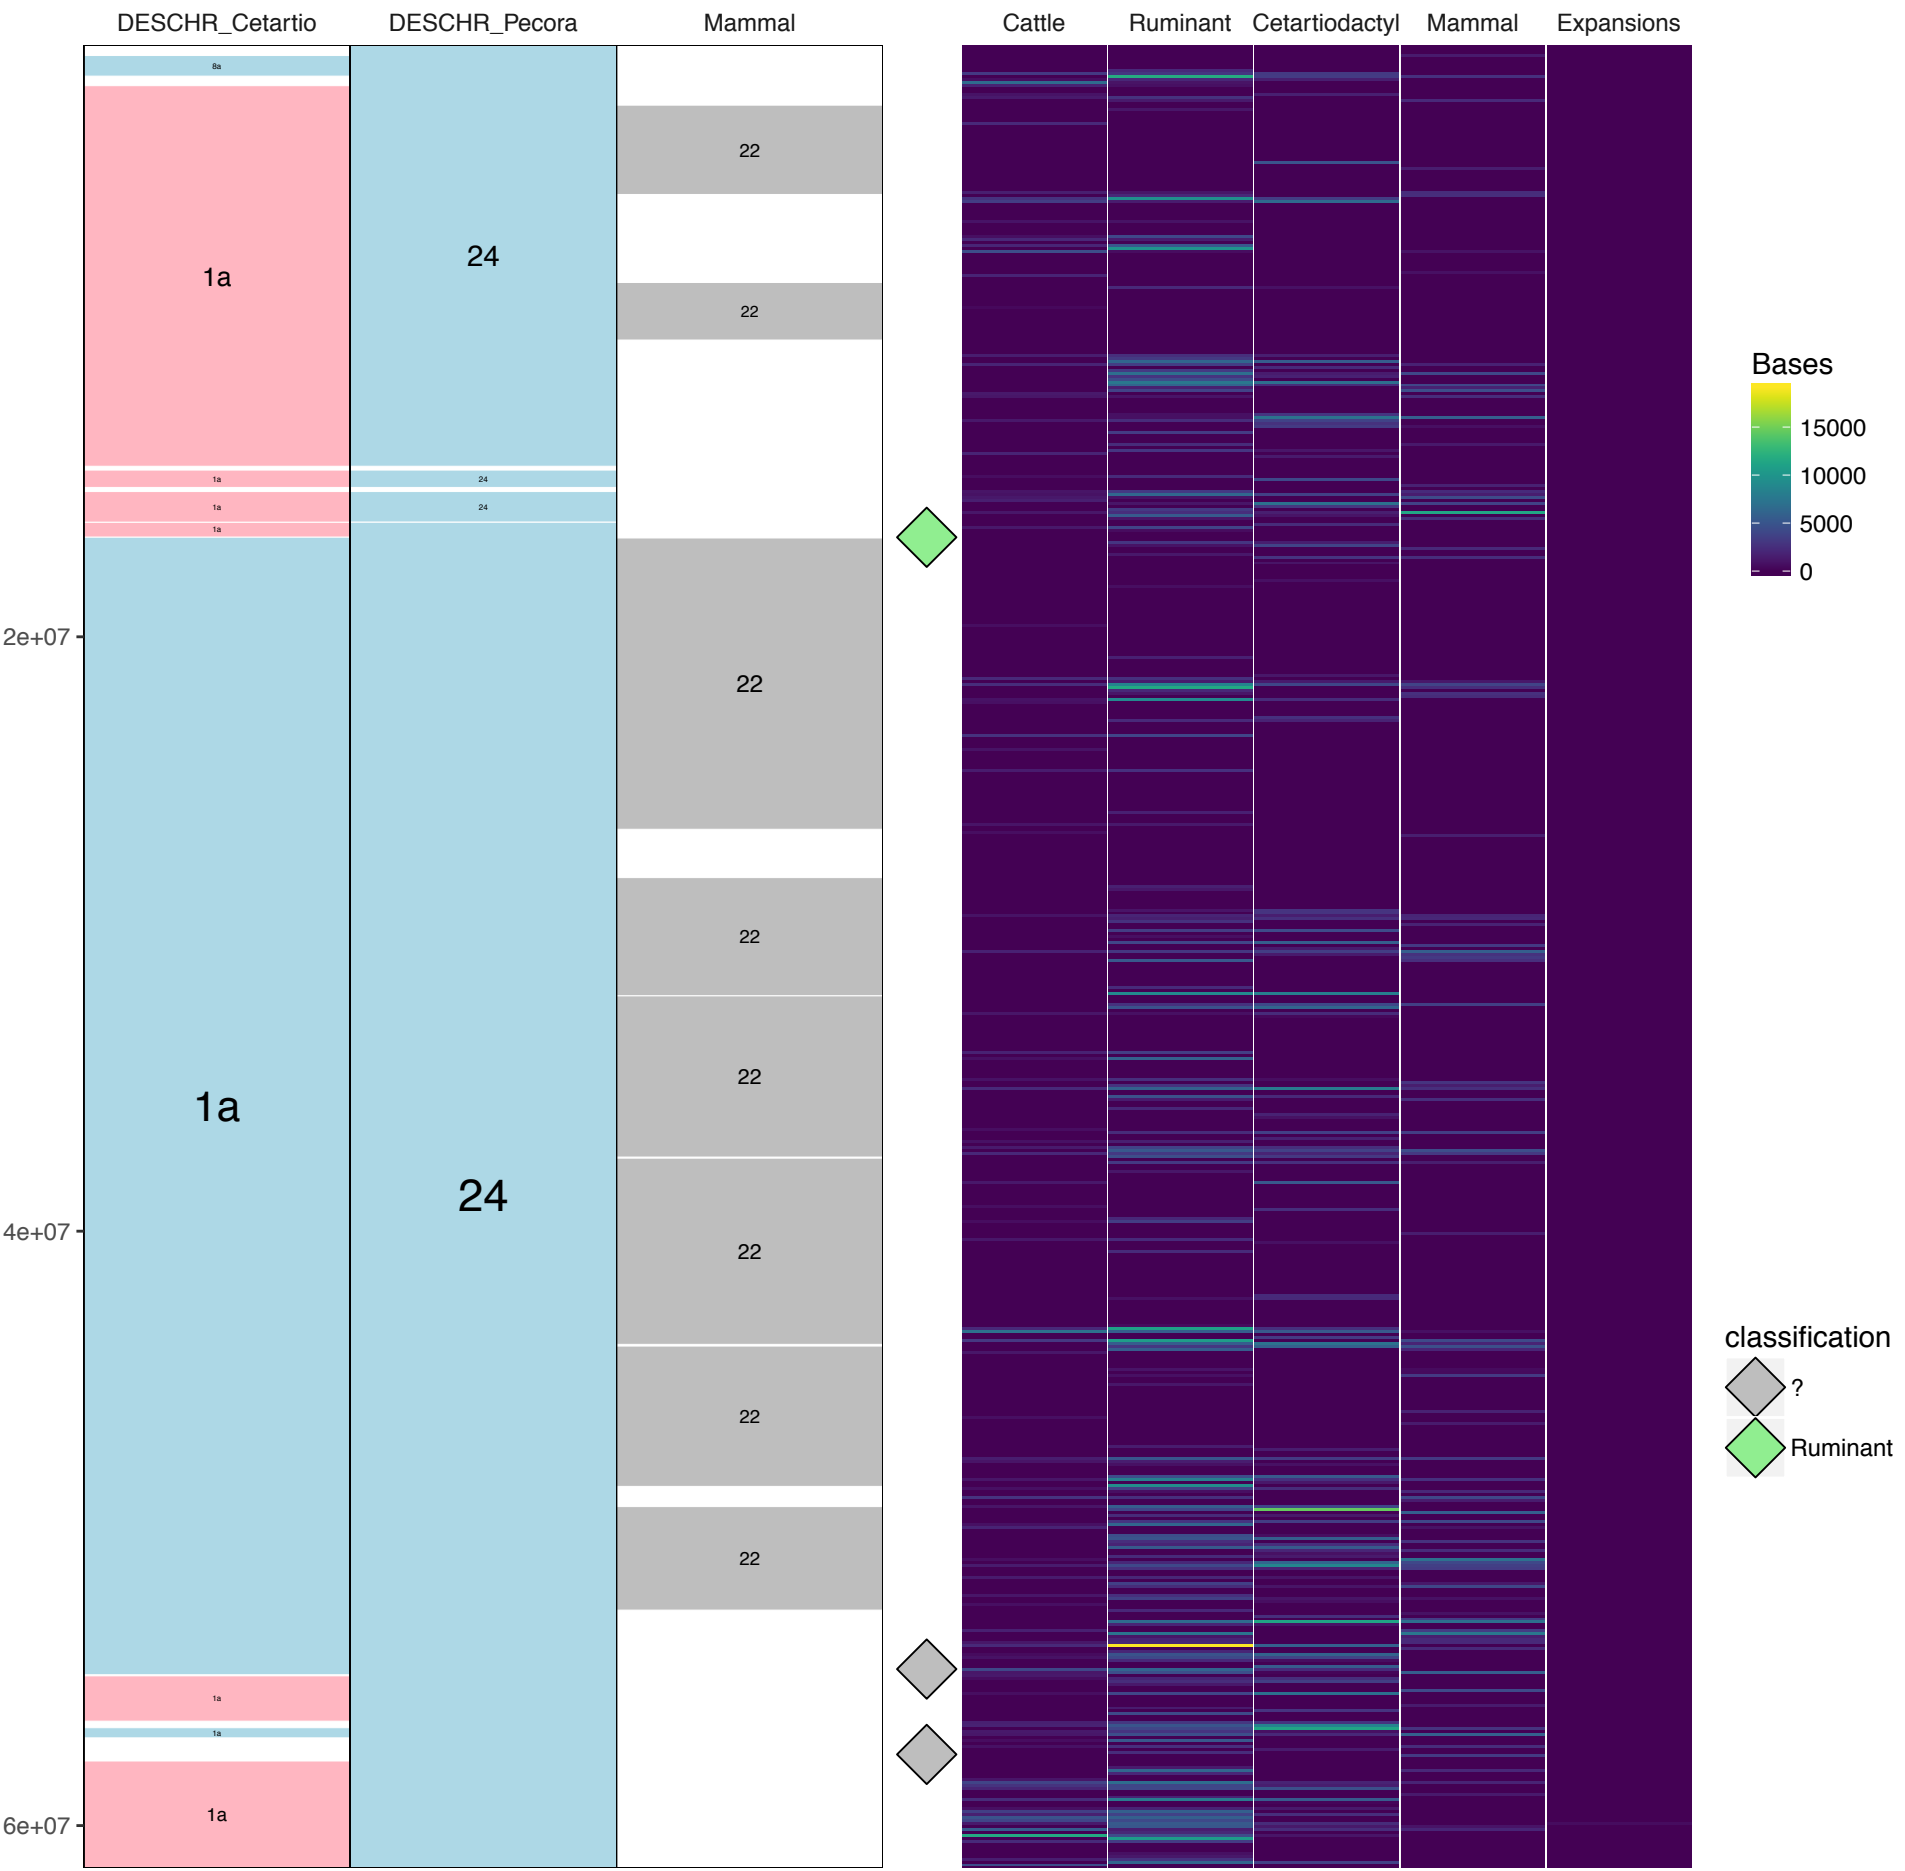

# Cattle chr23

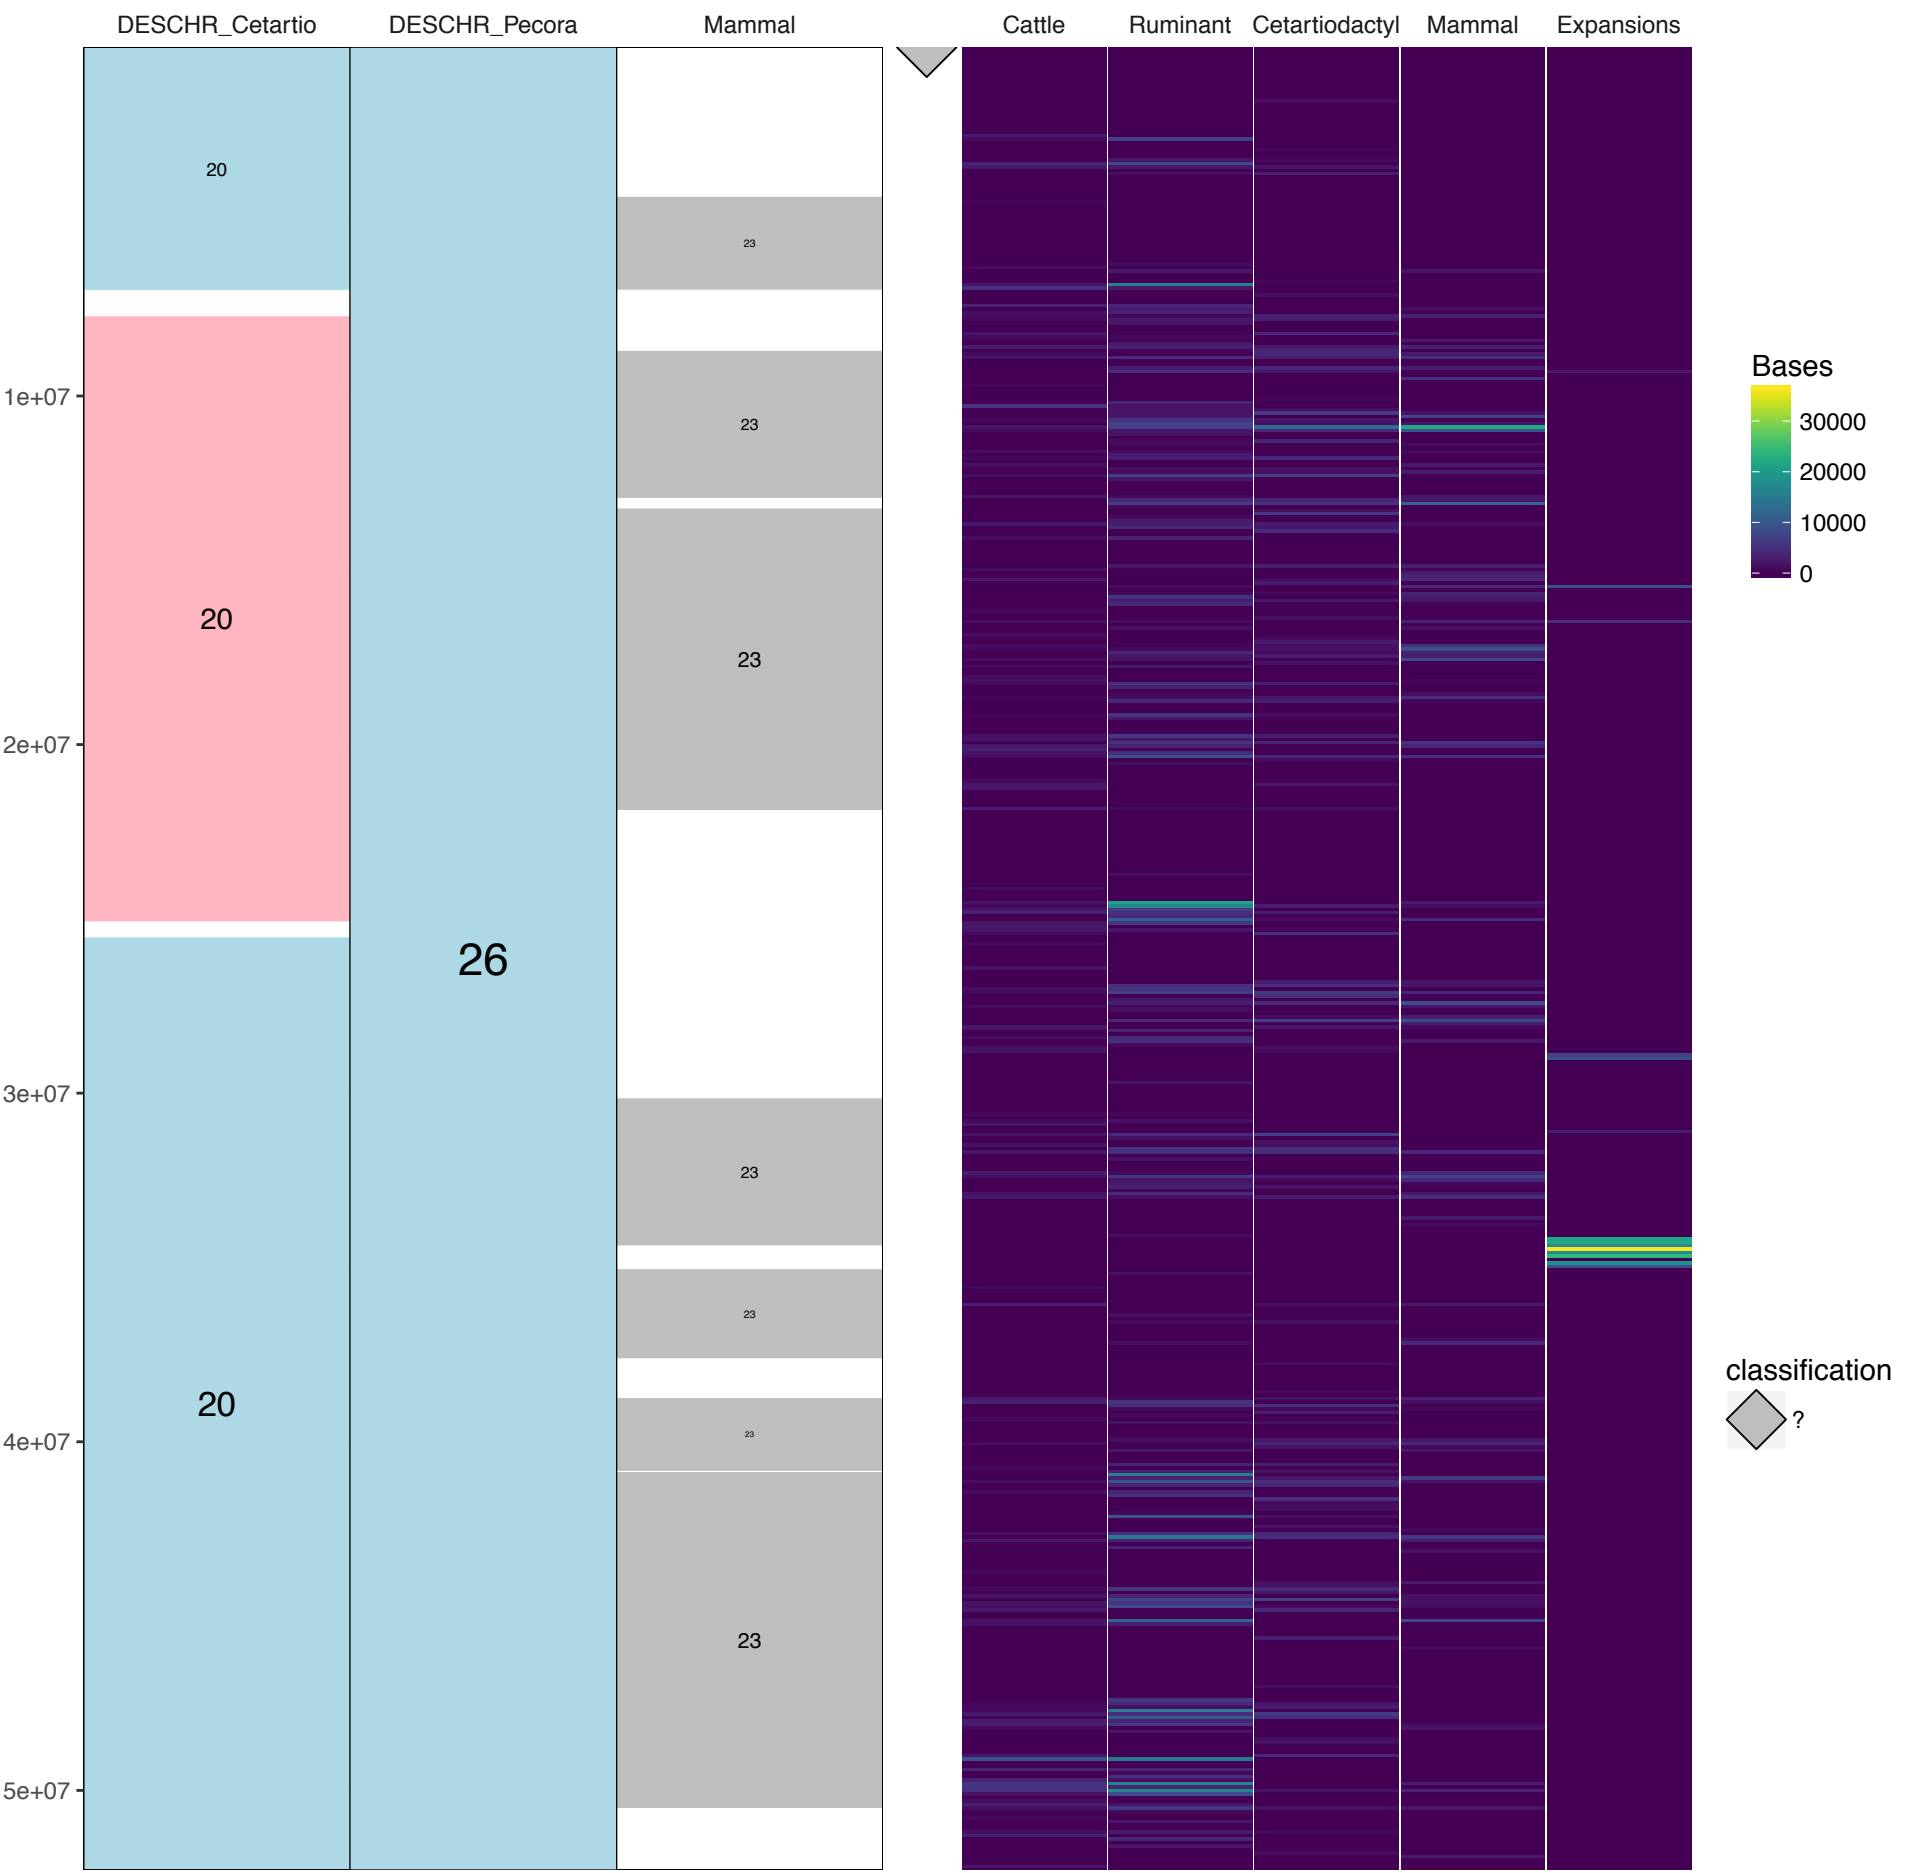



# Cattle chr24

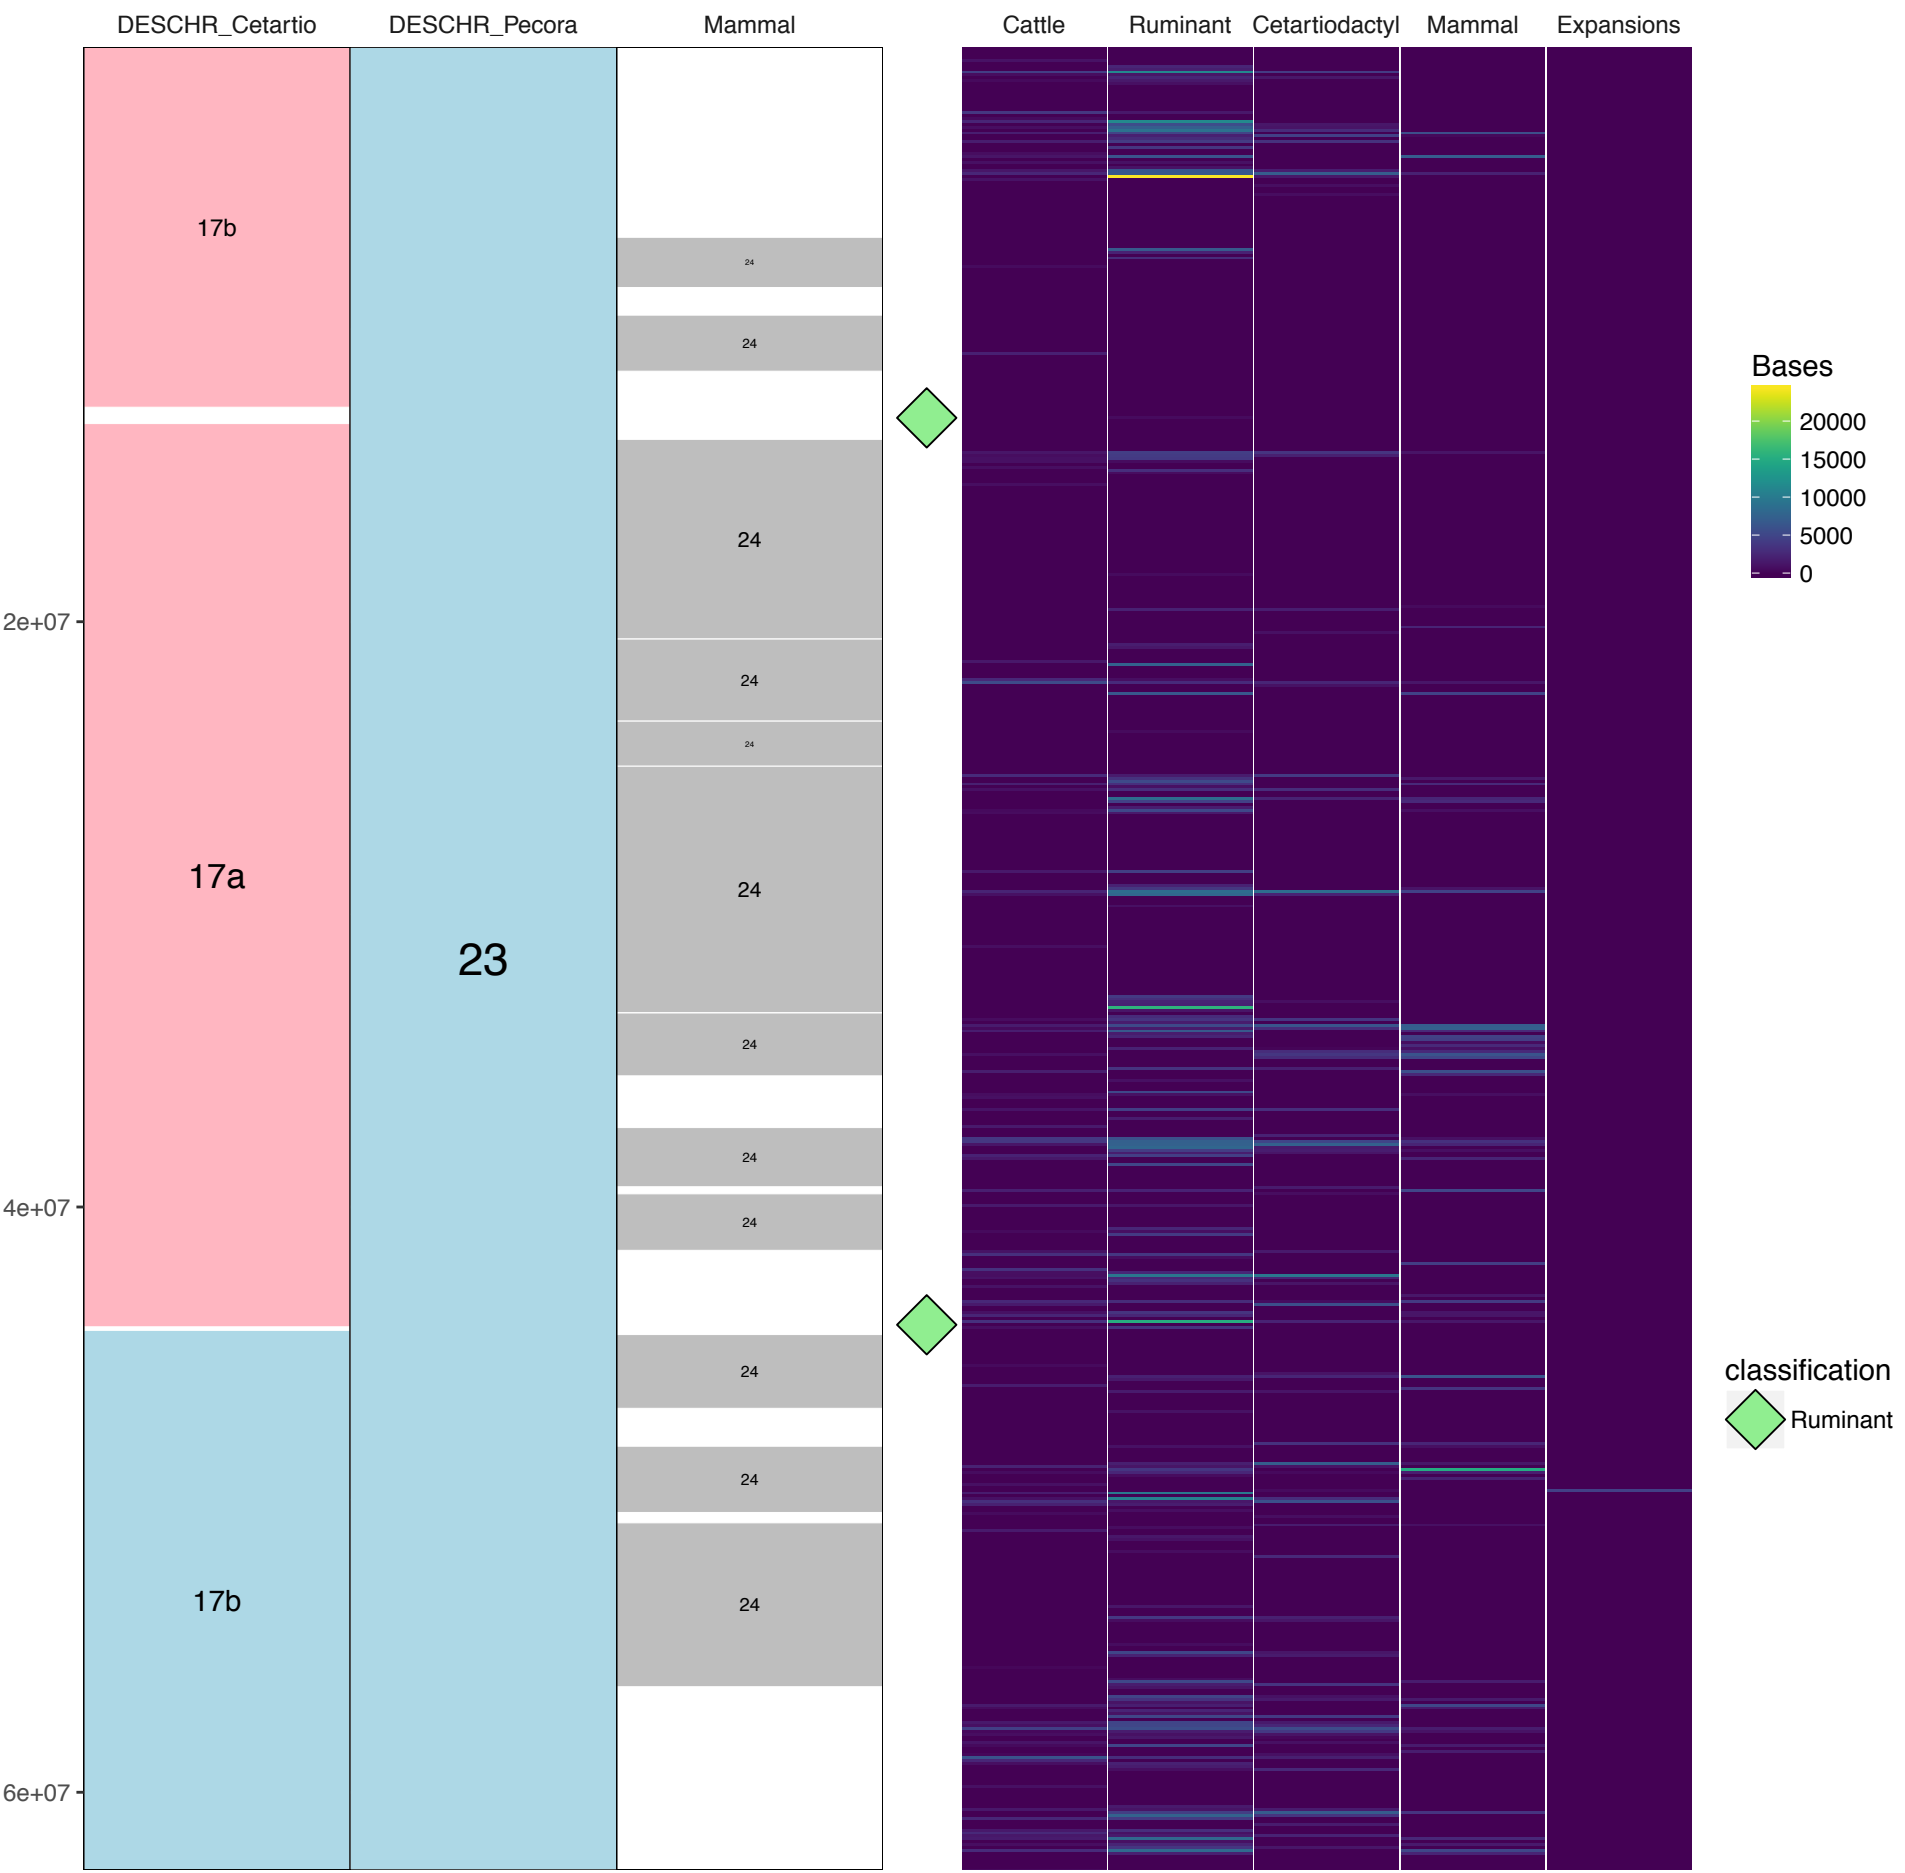

# Cattle chr25

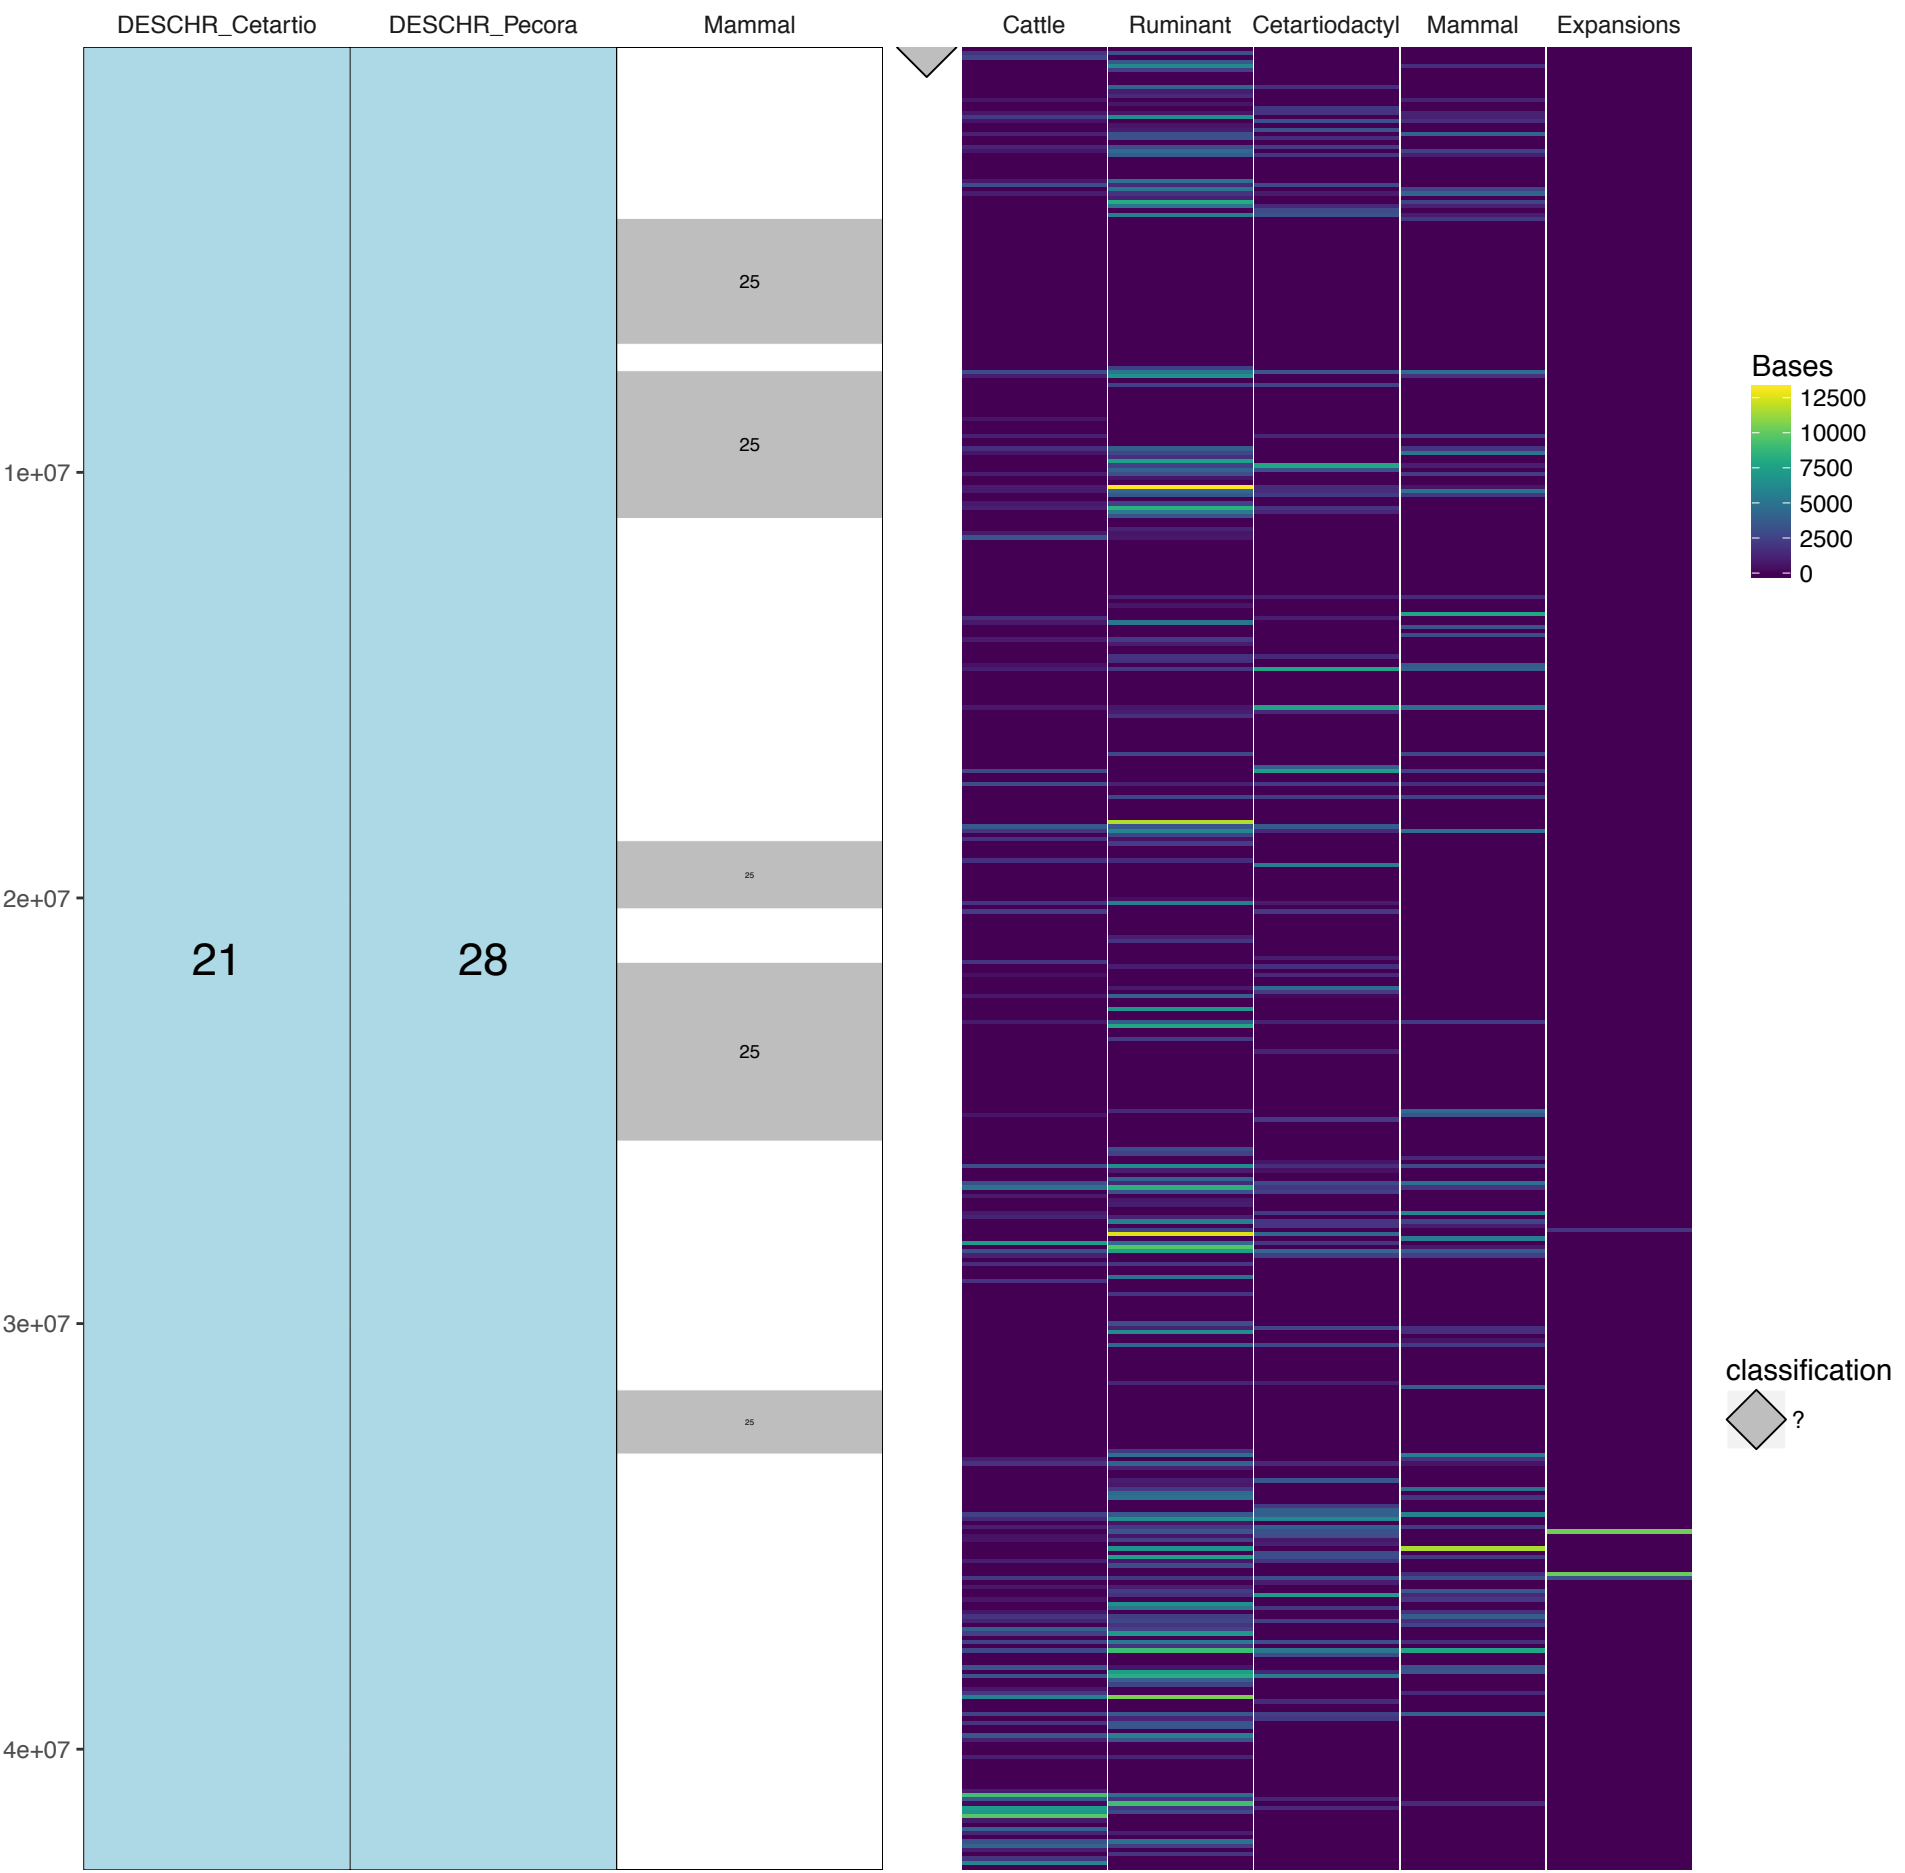

# Cattle chr26

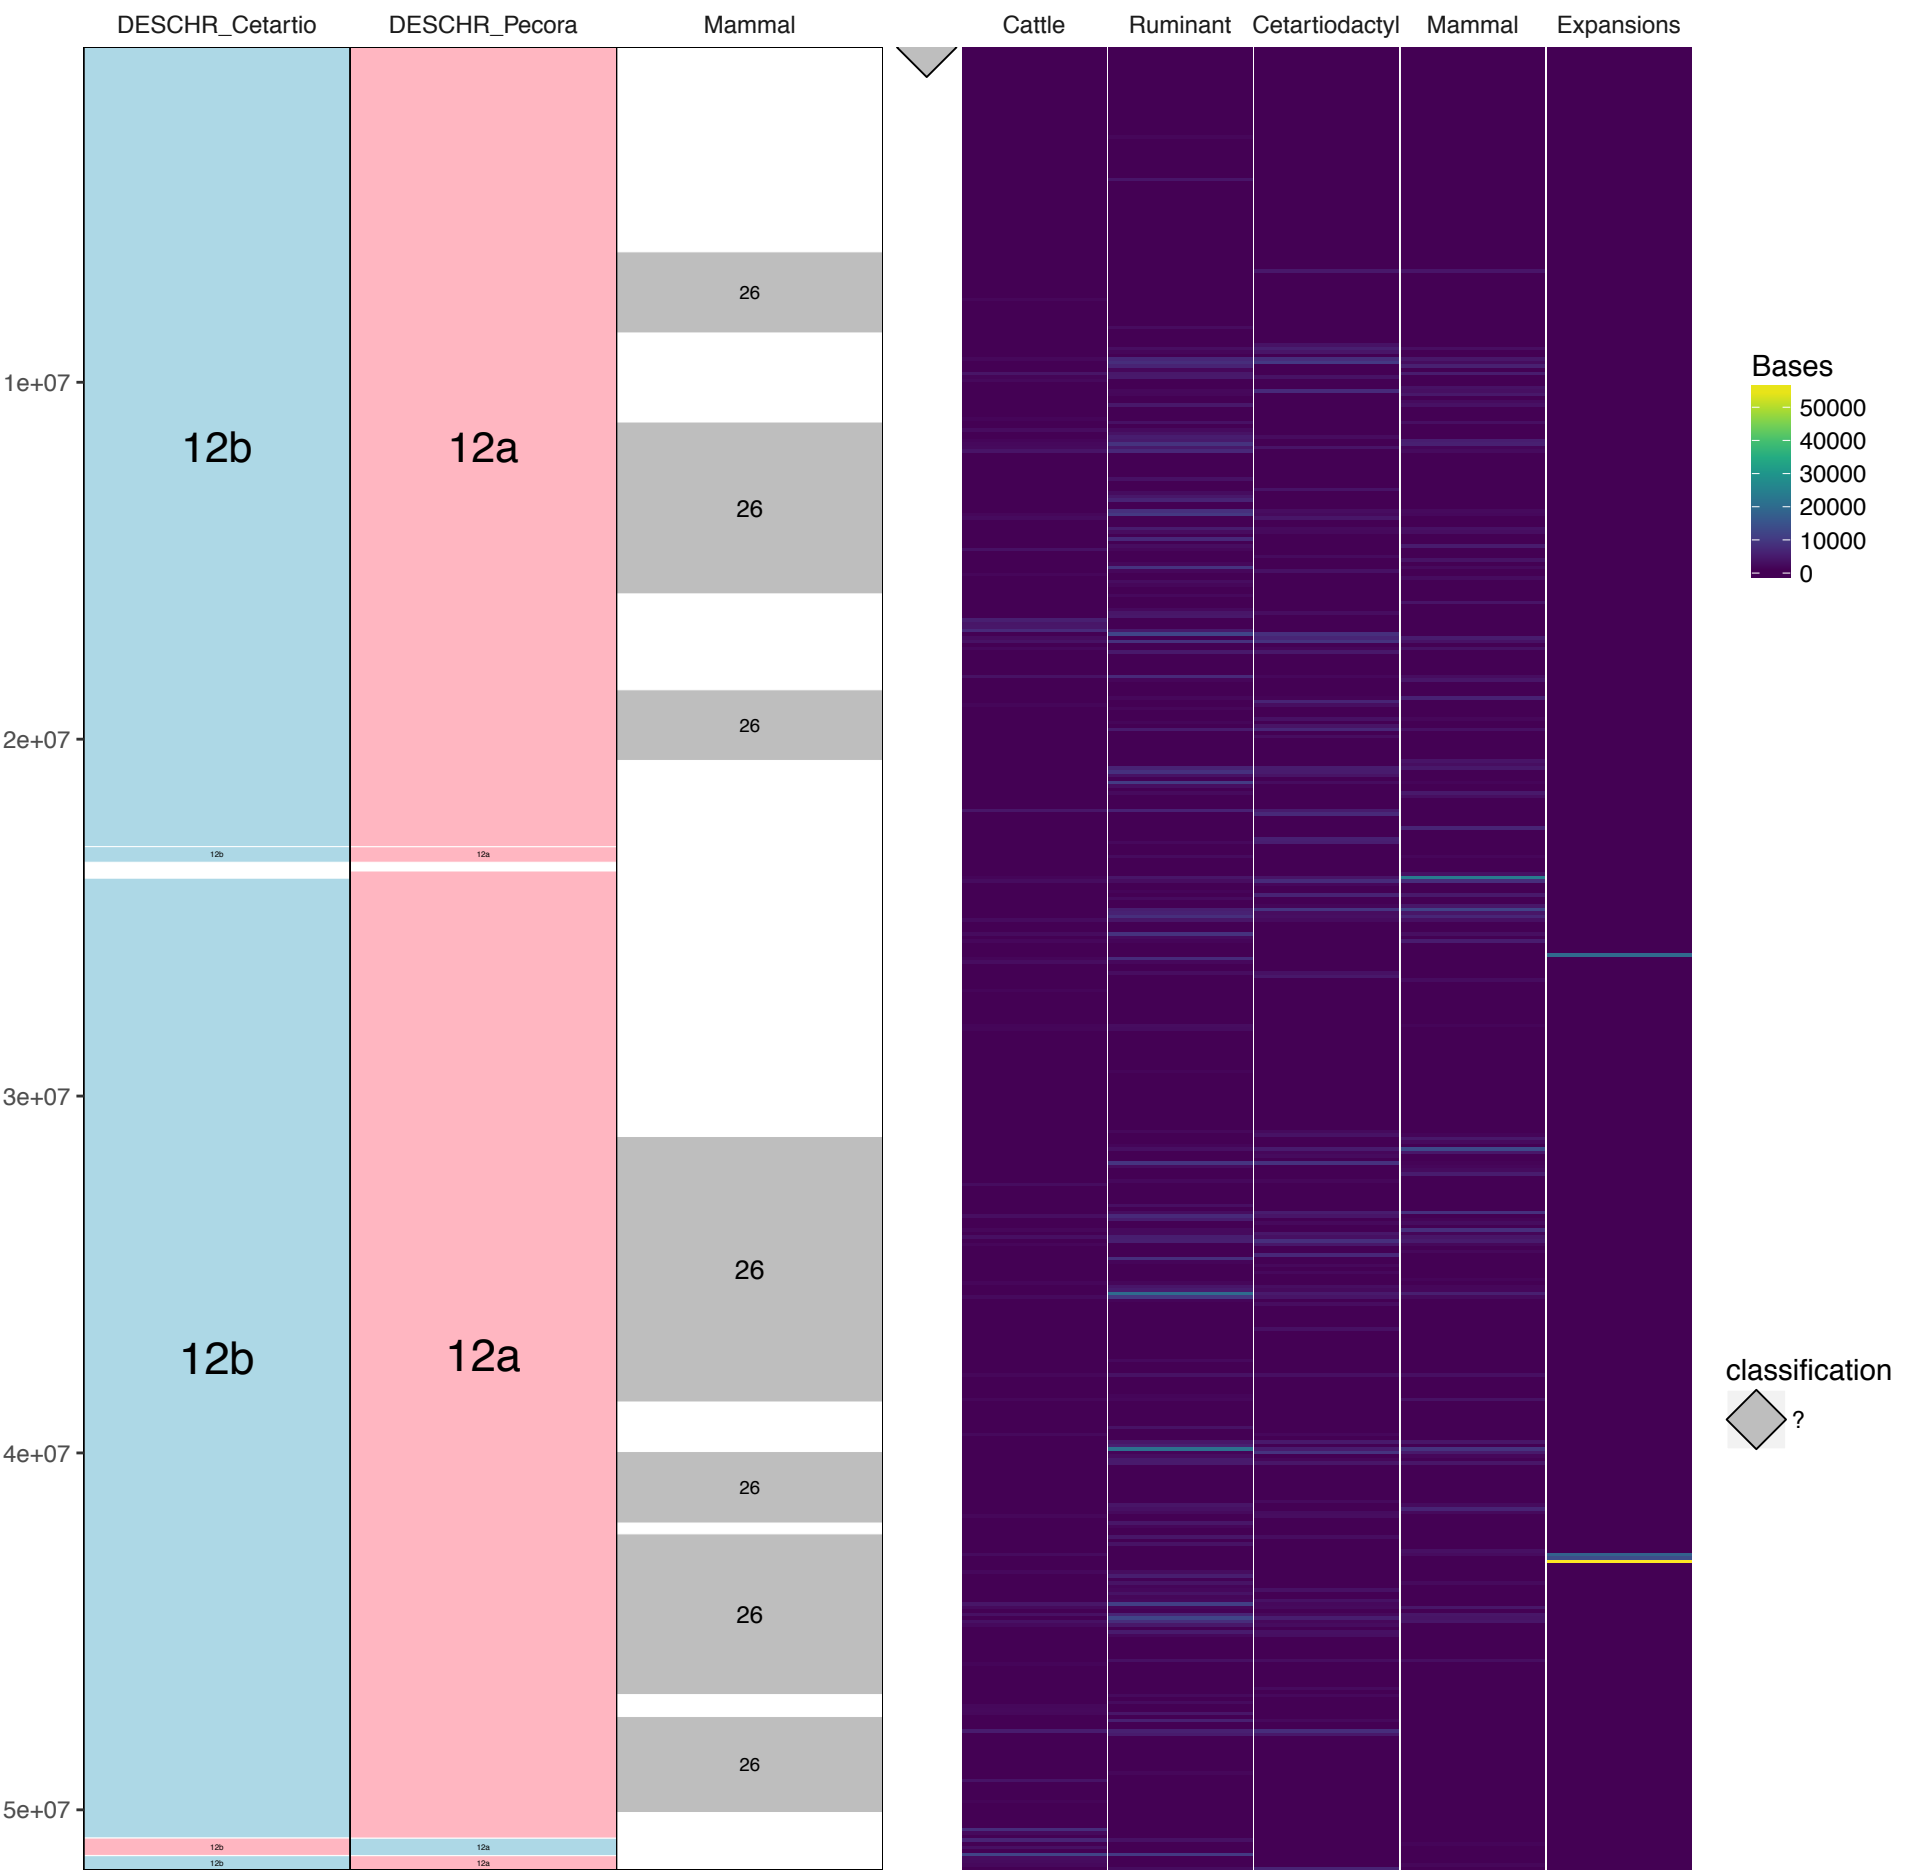

# Cattle chr27

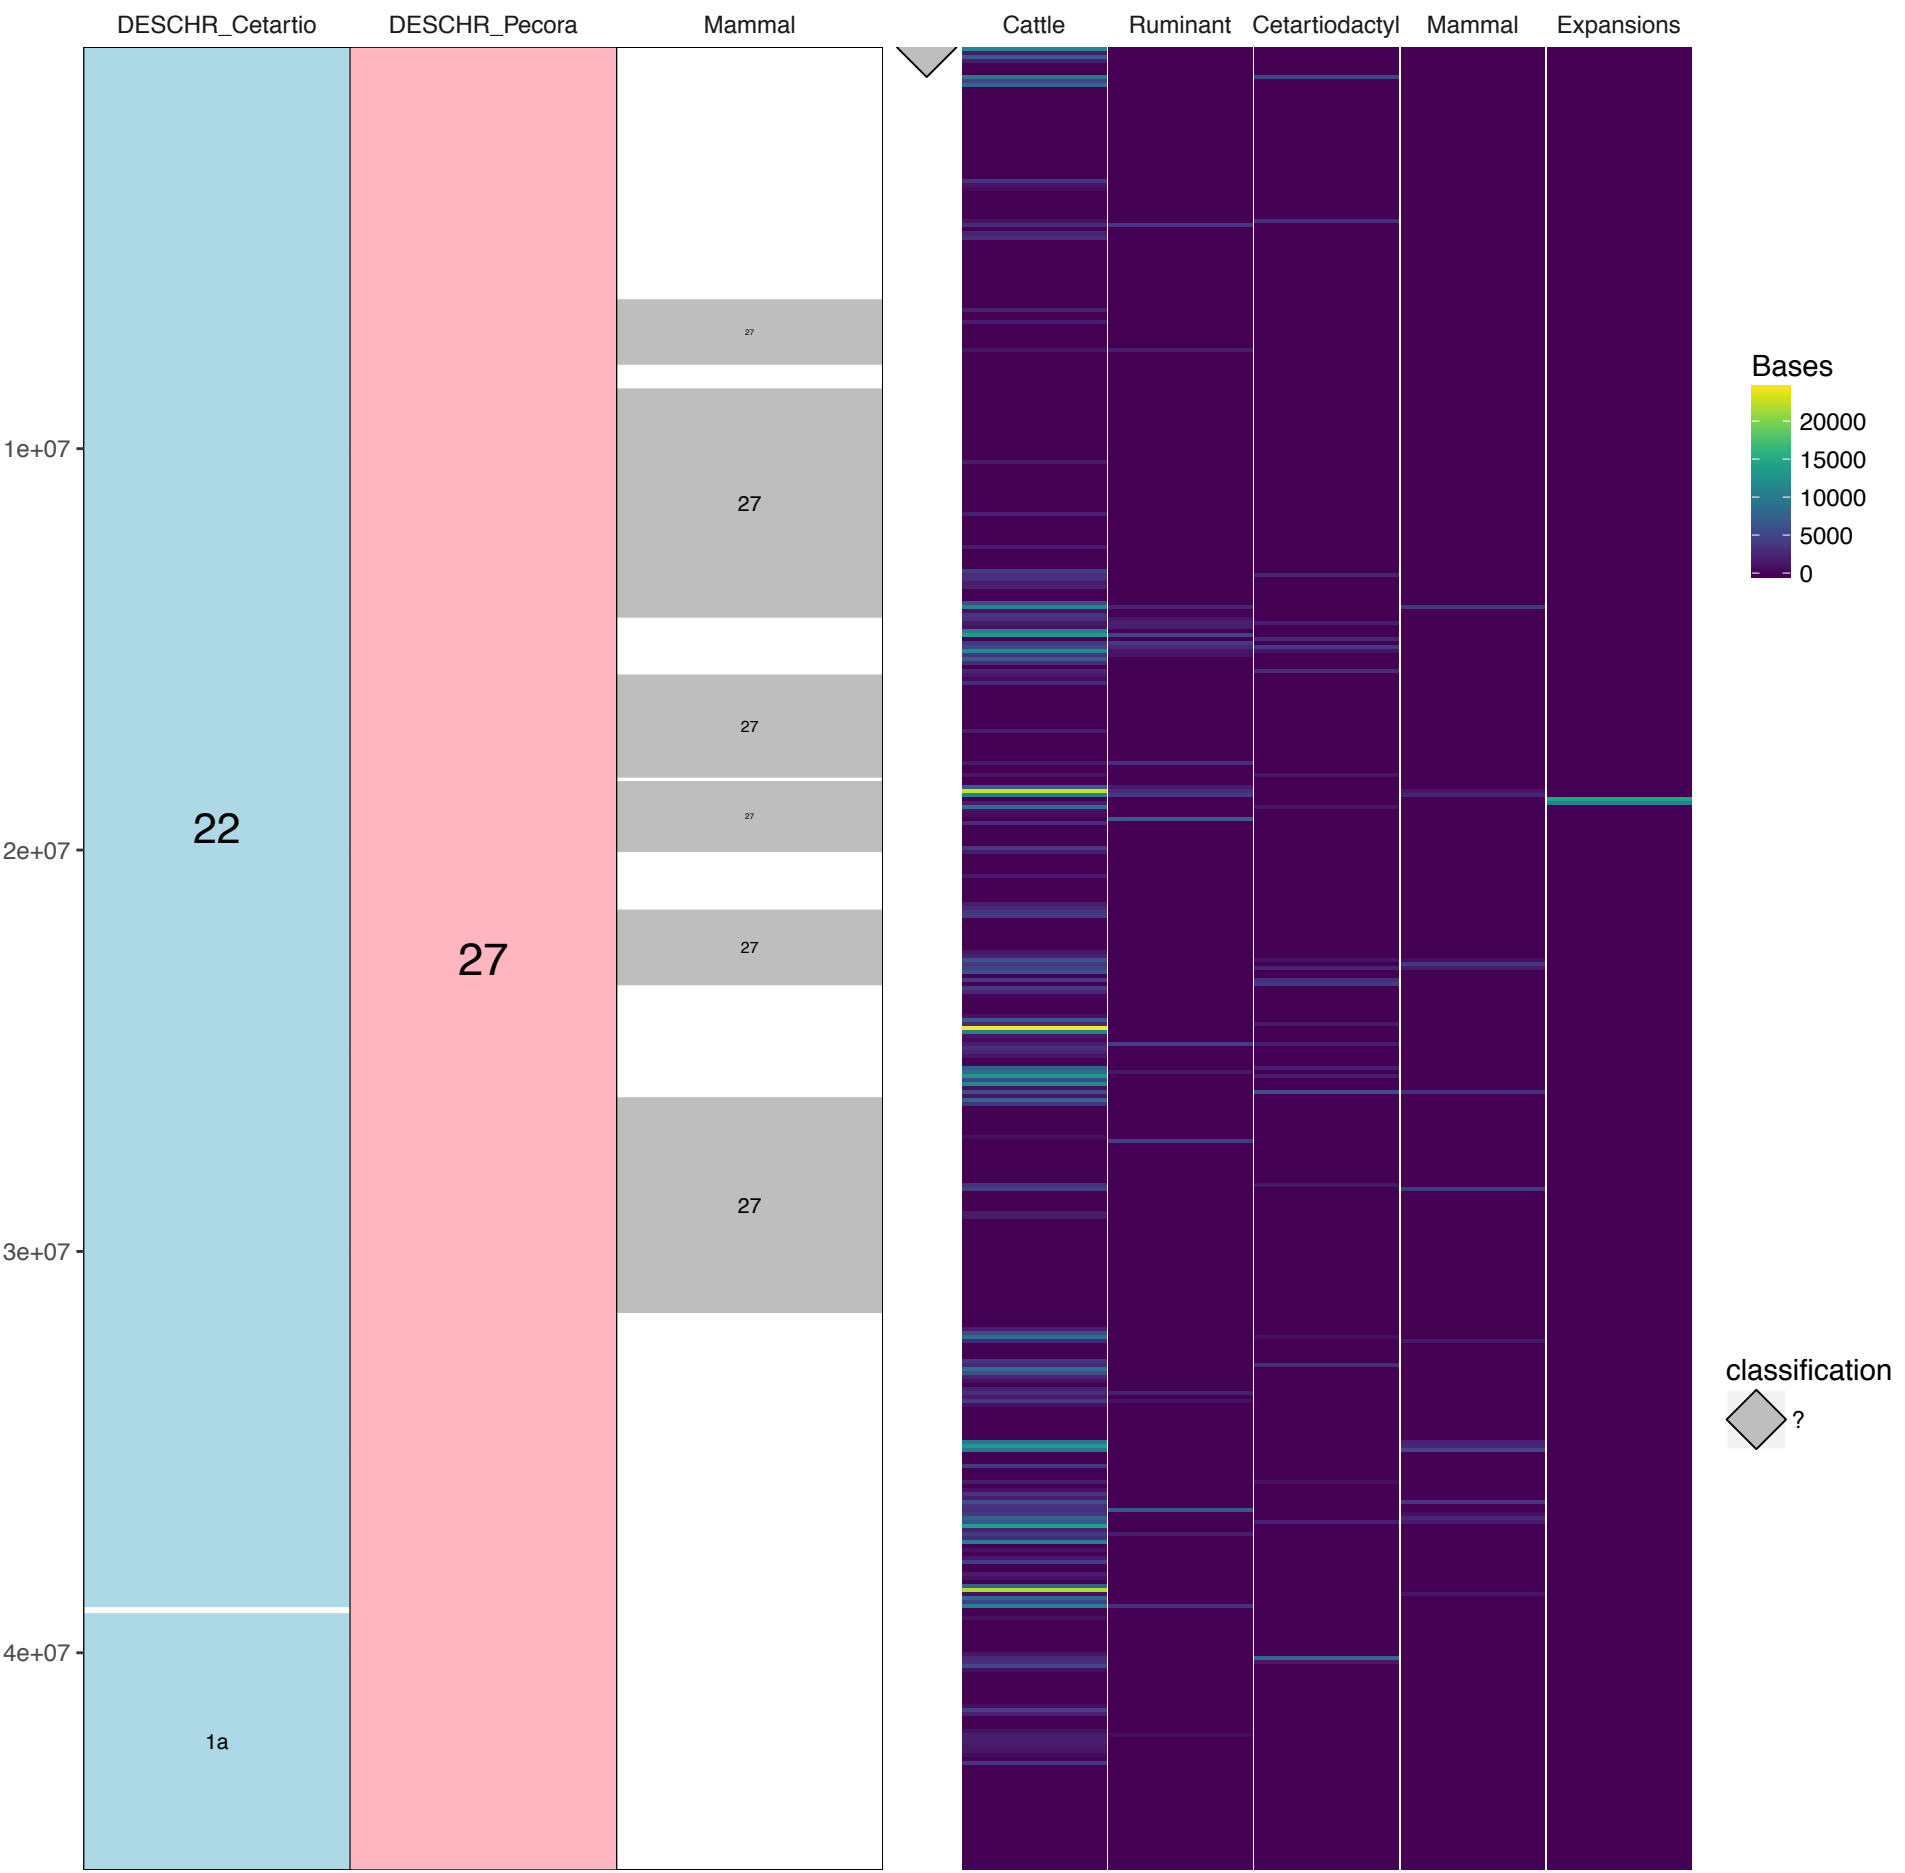

# Cattle chr28

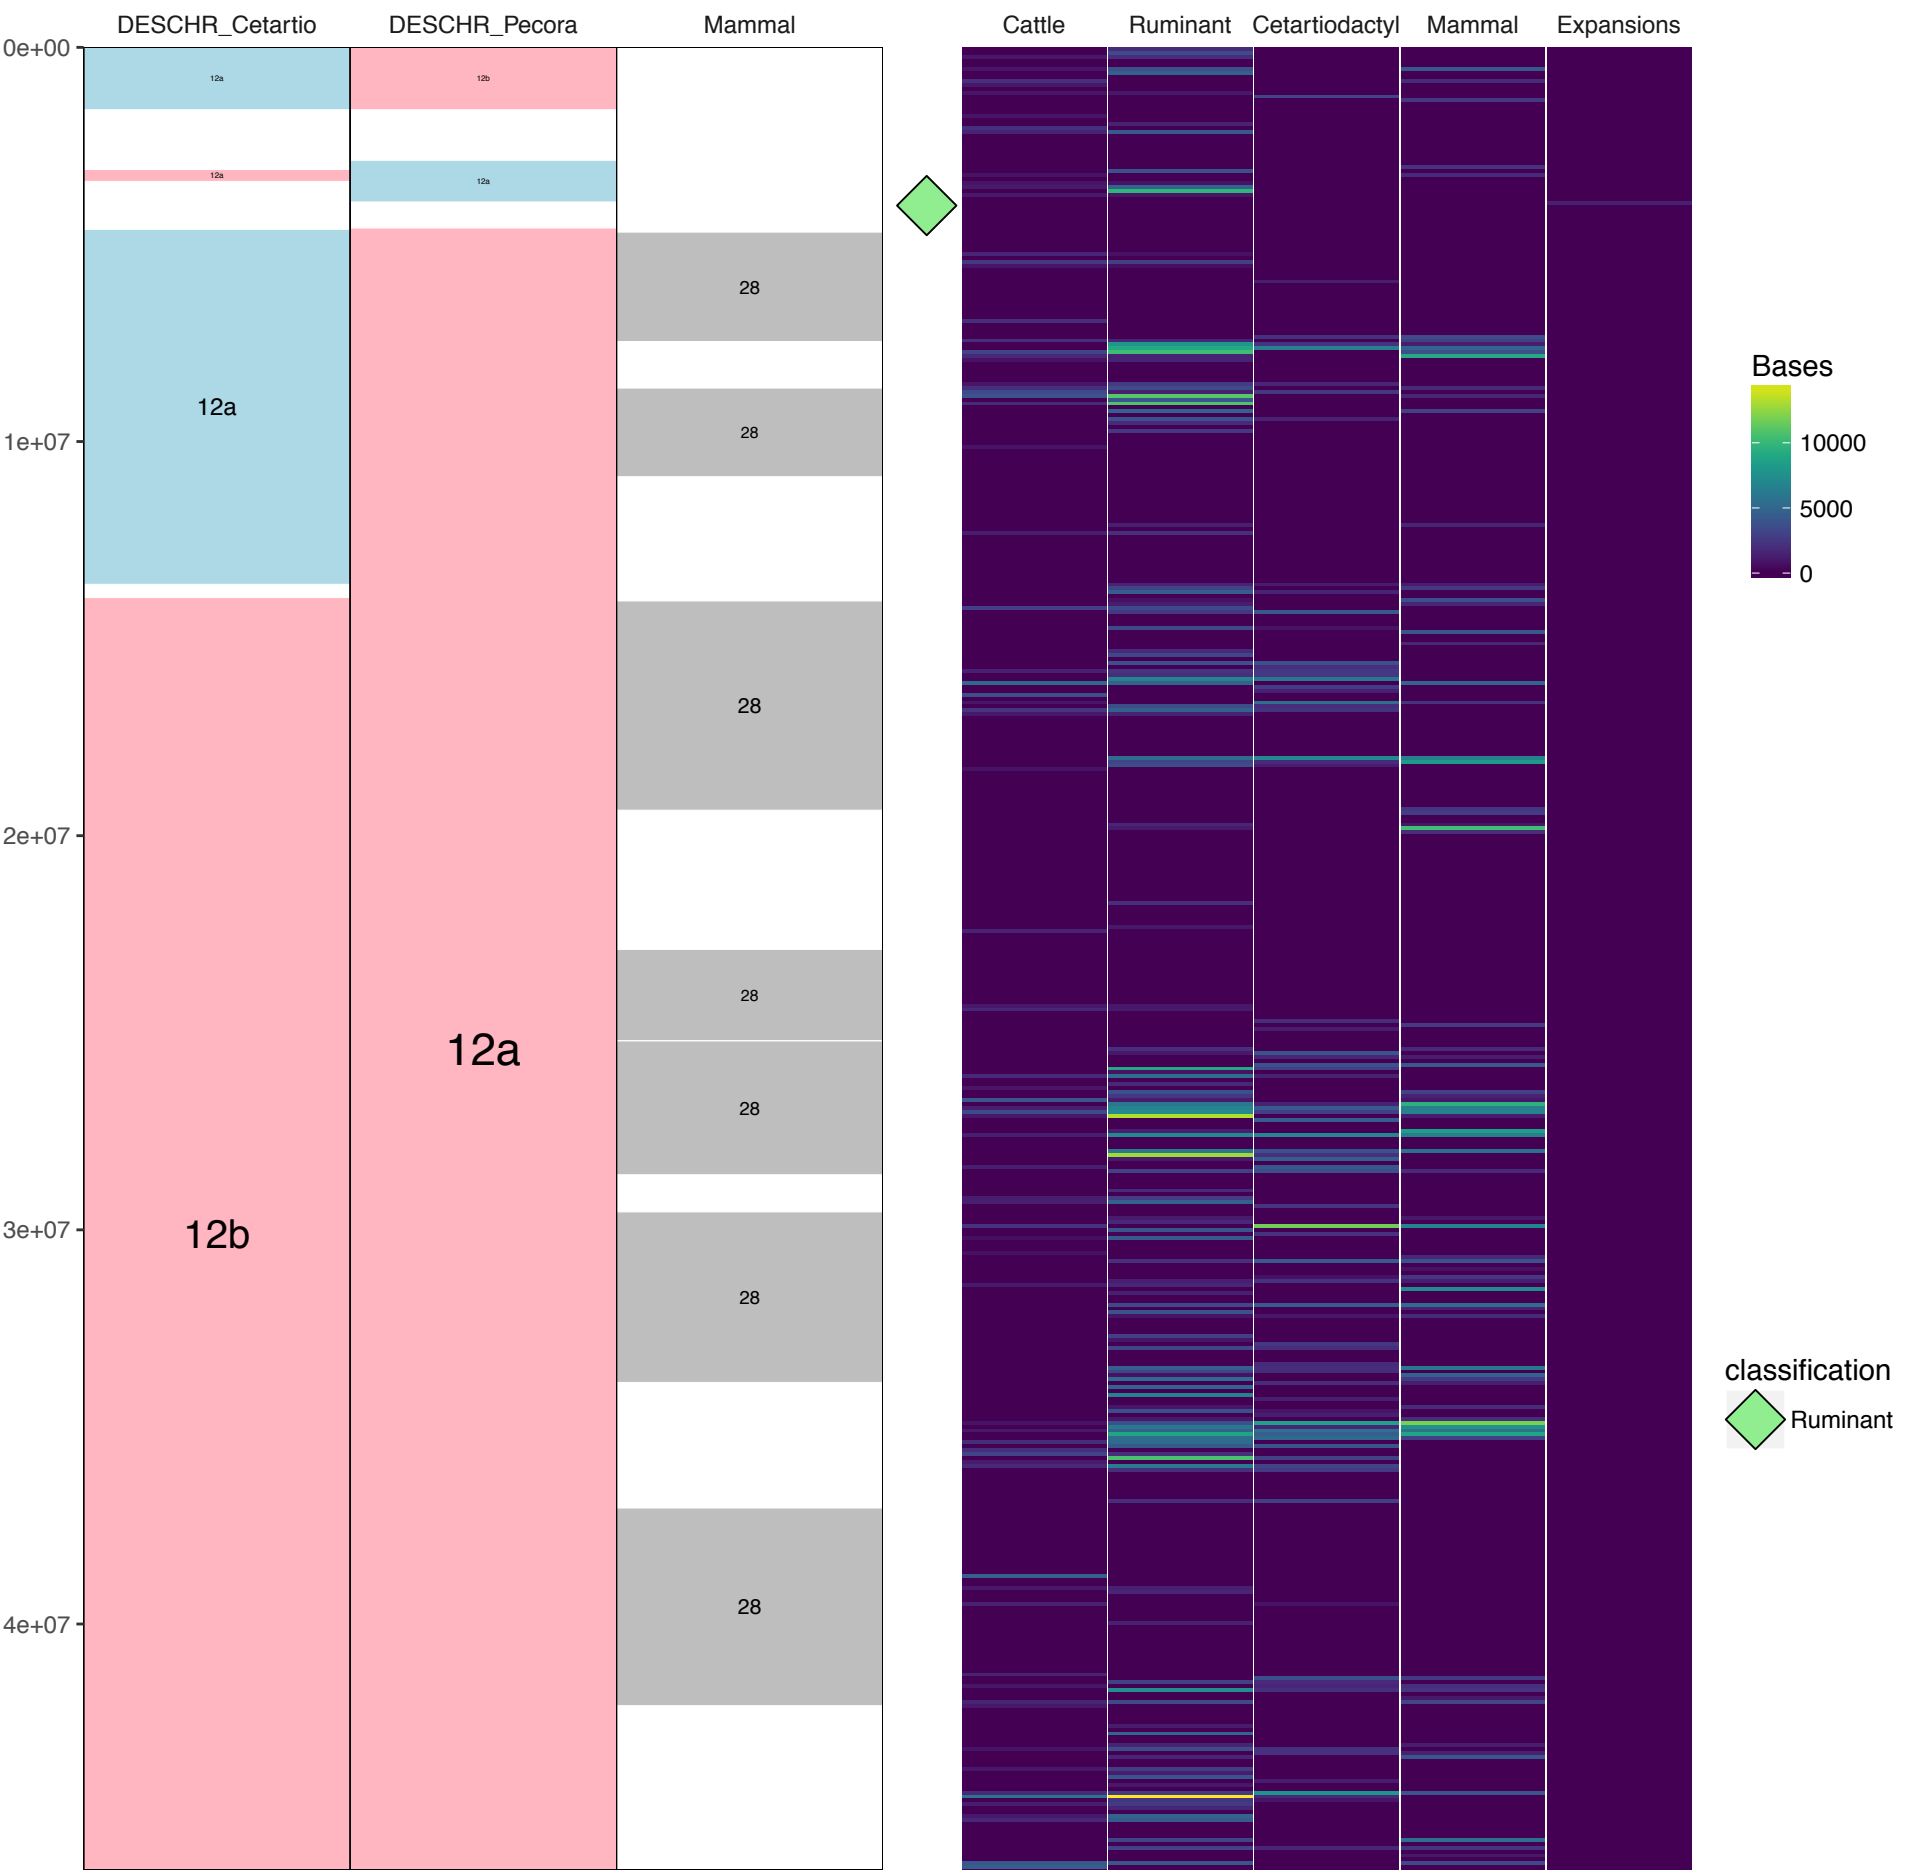

# Cattle chr29

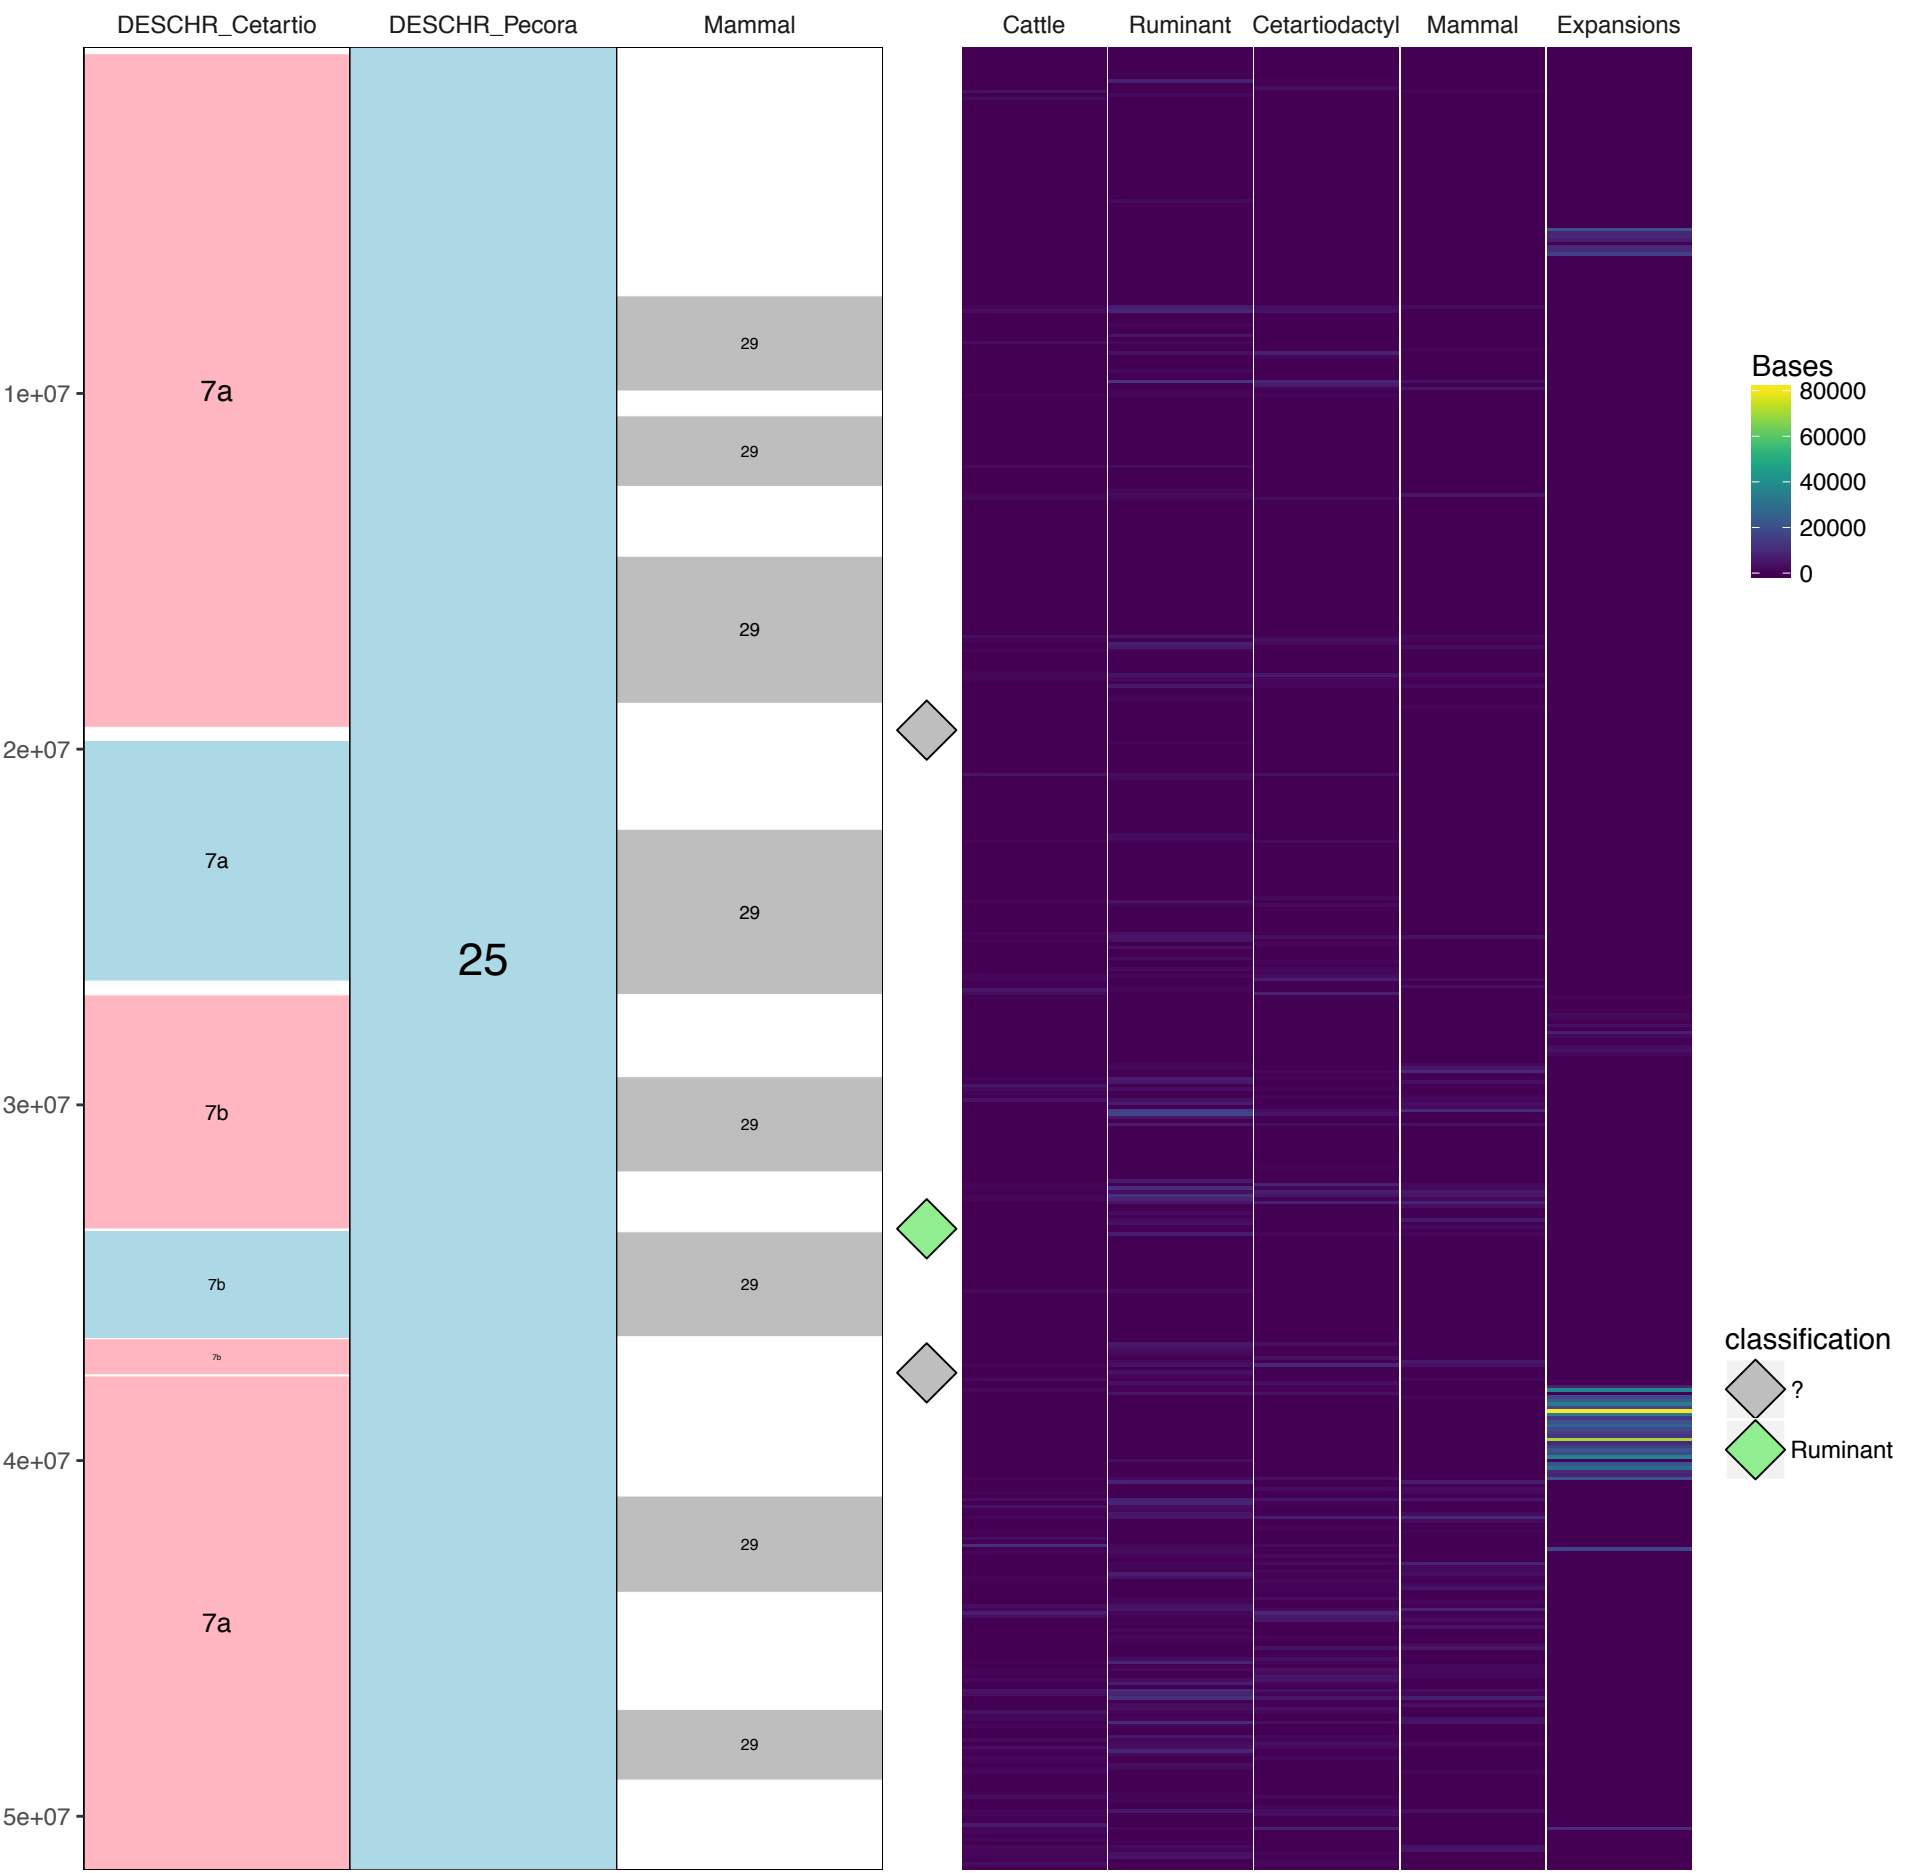

# Cattle chrX

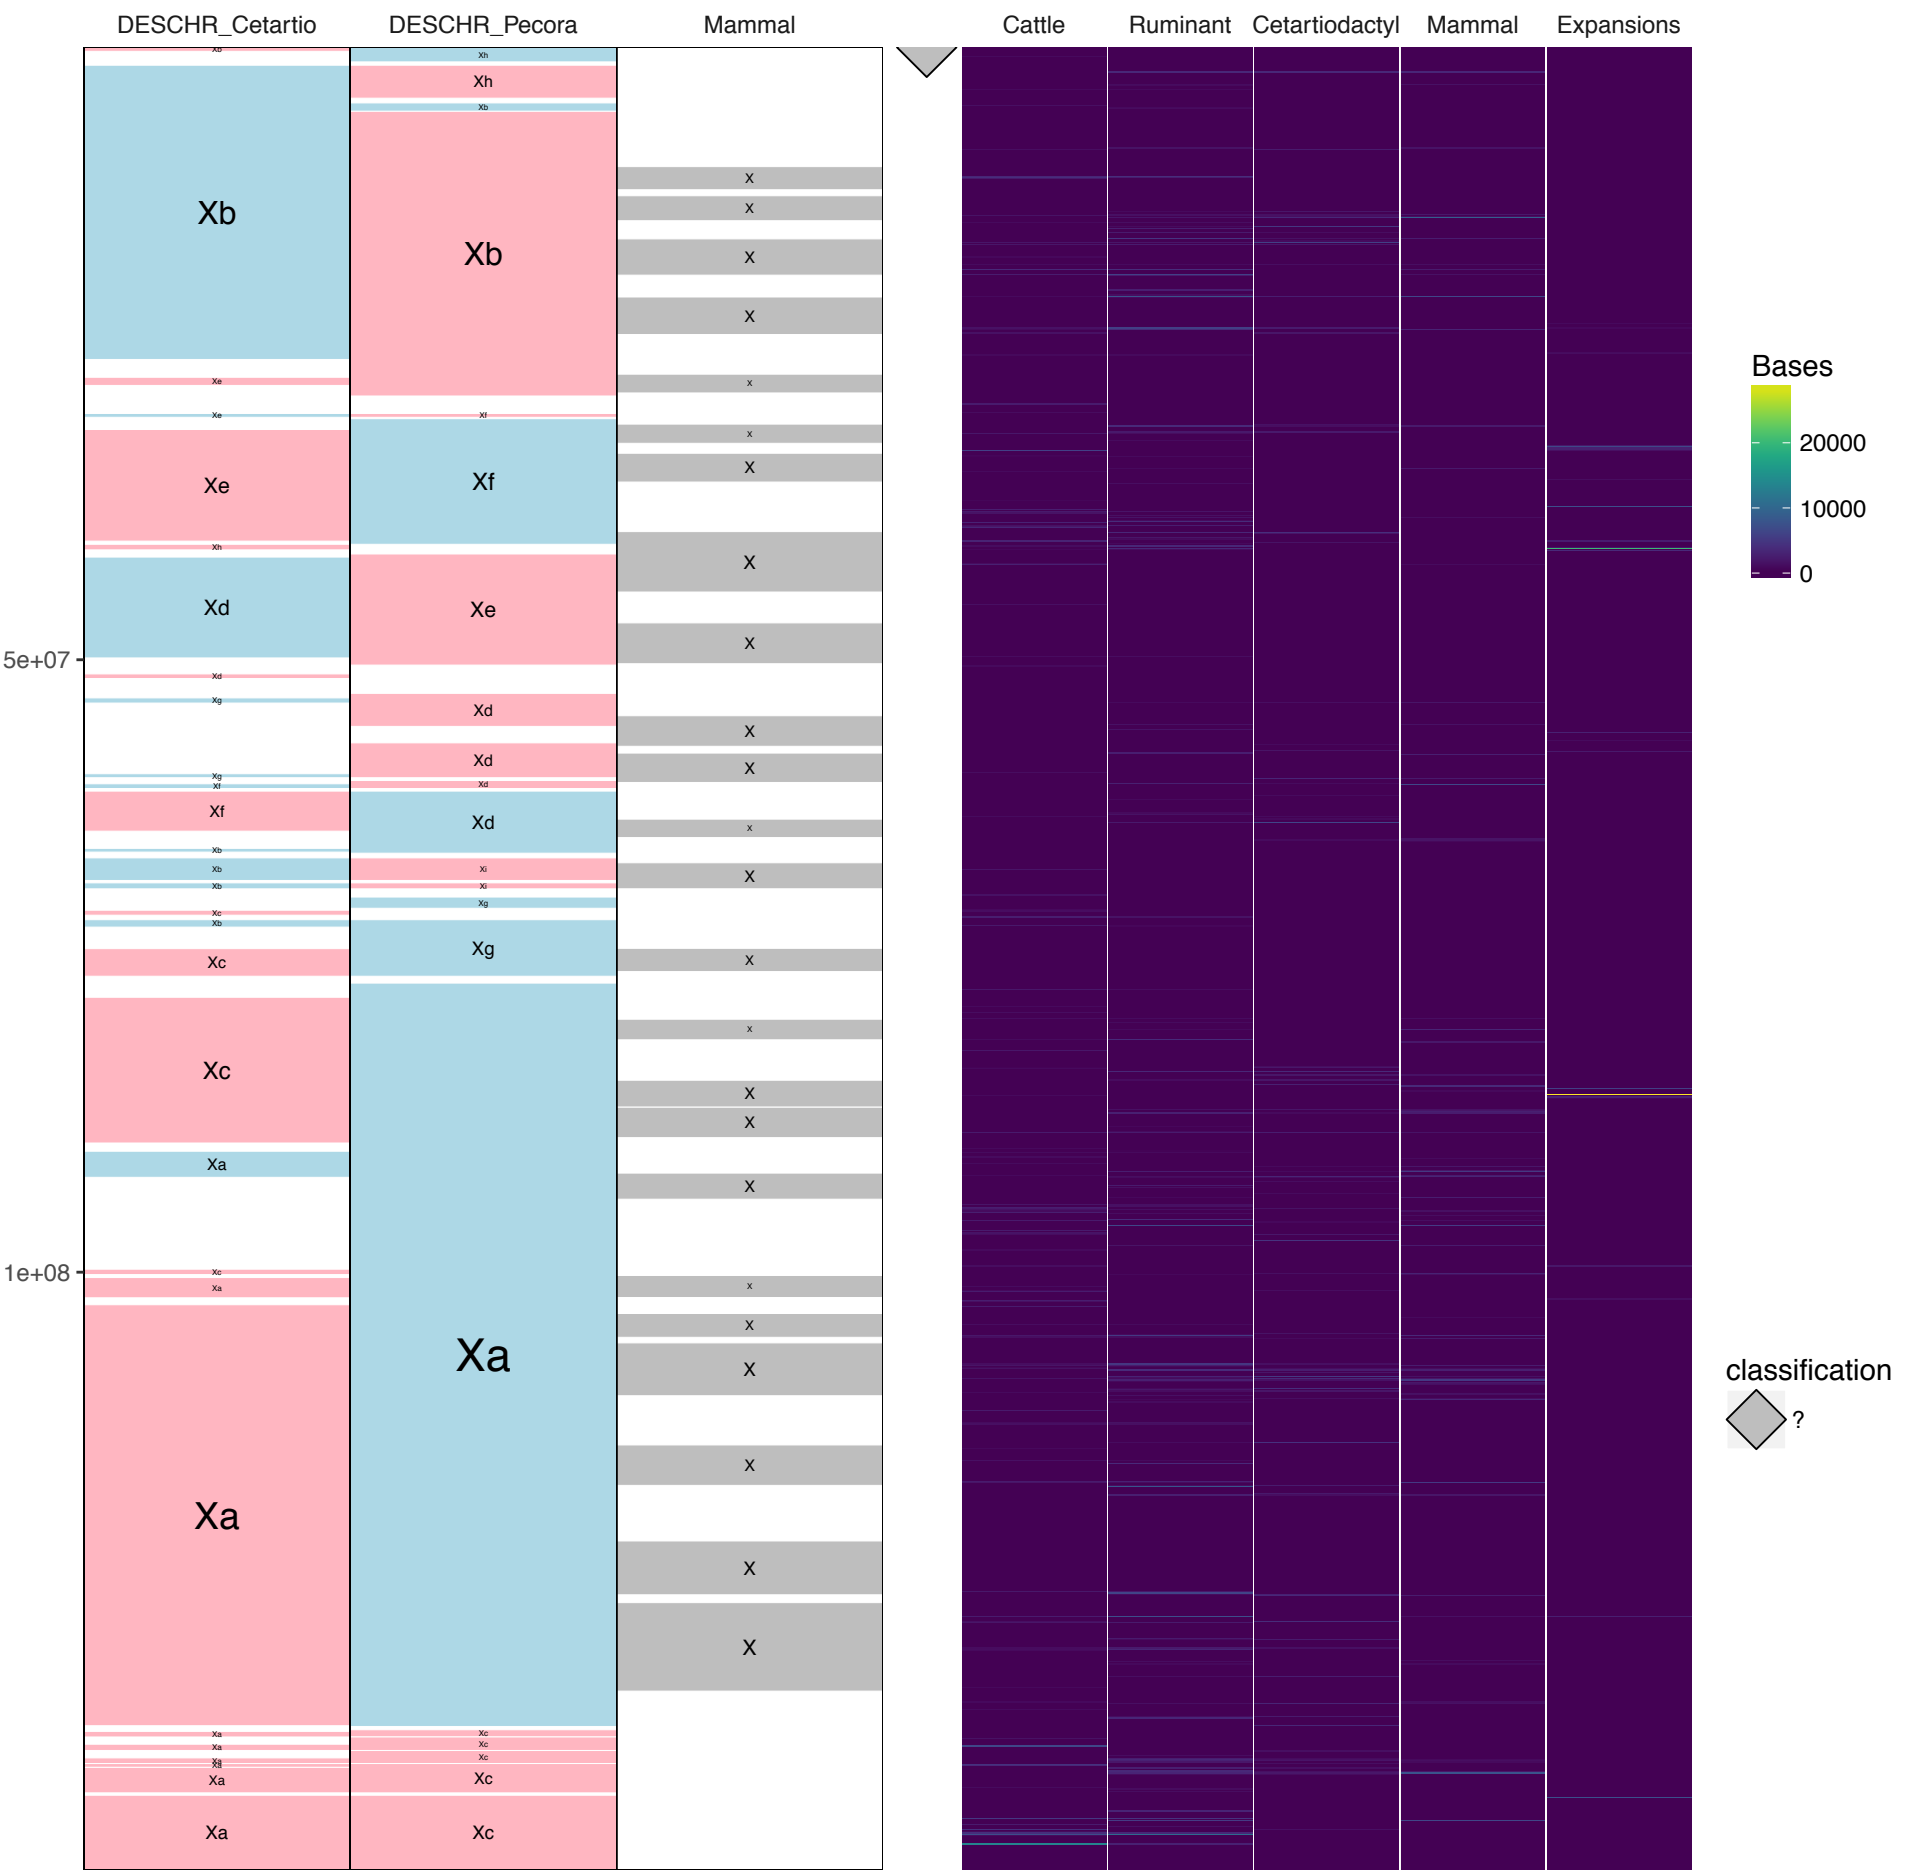

Supplement: supp_gr.239863.118_Supplemental_Fig_S6.pdf [file supp_gr.239863.118_Supplemental_Fig_S6.pdf]
