# Supplementary material for: Evolution of gene regulation in ruminants differs between evolutionary breakpoint regions and homologous synteny blocks
Source: HighWire-hosted journal article supplement (doi:10.1101/gr.239863.118), 2019-02-13
Supplement: Supplemental_Table_S3.xlsx [file Supplemental_Table_S3.xlsx]

## Sheet: Sheet1
Supplemental Table 3. Reorganized RACFs of ancestors and their mappings against the cattle genome.
Cetartiodactyl Ancestral Karyotype					Ruminant Ancestral Karyotype				Pecoran Ancestral Karyotype					Bovidae Ancestral Karyotype
CET	Cattle	RACFs	Kulemzina et al 2009		RUM	Cattle	Kulemzina et al 2011		PEC	Cattle	RACFs	Slate et al 2002		BOV	Cattle	RACFs
1	1,22	12,15,16	2		1	2,3,16	1		1	1	1,31	A2		1	1	2
2	7,10,20	2,37,46,49	3		2	6,17	2		2	2	2	B2		2	2	3
3	2,3,16	1,31	1		3	7,10,20	3		3	3	3	A1		3	3	4
4	6,17	3,38,42	5		4	1	6		4	4	4	D		4	4	5
5	10,21	4	4		5	10,21	4		5	6	5	F		5	5	6
6	2,3	5	8		6	4	7		6	5	6	C2		6	6	7
7	15,29	7,28,53	9		7	2,3	8		7	8	7	B1		7	7	1
8	4,22	18,19	7		8	15,29	9		8	7	8	E		8	8	8
9	5	14,25	10		9	5	10		9	11	9	C1		9	9	10
10	9	6	11		10	9	11		10	9	10	H1		10	10	31
11	8,11	8,45,51,54,57	6		11	8,11	5		11	10	11	G		11	11	9
12	26,28	11,39	13		12	11	12		12	26,28	12,40	U		12	12	11,34
13	12	10,56	15		13	26,28	13		13	12	13	I		13	13	14
14	11	9	12		14	12	15		14	14	14	H2		14	14	12
15	14	13	14		15	13	16		15	15	15	L		15	15	13
16	19	17	16		16	22	17		16	16	16	K		16	16	15
17	24	26,27	17		17	19	18		17	13	18,35	J		17	17	17
18	18	30,32,43,48	19		18	24	19		18	17	17	N1		18	18	19
19	13	20	21		19	14	14		19	20	19	O		19	19	20
20	23	21	18		20	18	20		20	21	24	P		20	20	18
21	25	22	20		21	23	21		21	19	20	N2		21	21	23
22	27	24	24		22	25	22		22	18	21	M		22	22	22
23	17	29,50	22		23	27	23		23	24	22	S		23	23	25
24	13	34,40	23		X	X	X		24	22	23	Q		24	24	21
25	8	33	25						25	29	28	W		25	25	29
X	X	23,35,36,41,44,47,52,55	X						26	23	27	R		26	26	26
									27	27	25	V		27	27	24
									28	25	29	T		28	28	28,35
									X	X	26,30,32,34,35,36,37,38,39	X		29	29	27
														X	X	16,30,32,33
