# Supplementary material for: Evolution of gene regulation in ruminants differs between evolutionary breakpoint regions and homologous synteny blocks
Source: HighWire-hosted journal article supplement (doi:10.1101/gr.239863.118), 2019-02-13
Supplement: Supplemental_Table_S4.xlsx [file Supplemental_Table_S4.xlsx]

## Sheet: Sheet1
Supplemental Table 4. Classification of ruminant lineage EBRs using the placement of cattle BACs in chevrotain and giraffe metaphase spreads.
EBR chr	EBR start	EBR end	Name	Chromosome	Start	End	In chevrotain	In giraffe	classification
1	45209037	45262926	CH240-361P11	1	44215621	44374435	Near	Near	Ruminant
			CH240-361J7	1	45518665	45667191
1	153222464	153223054	CH240-406A19	1	150670963	150818458	Near	Near	Ruminant
			CH240-315L21	1	157163547	157316991
2	5454708	5457605	CH240-341J1	2	5056247	5192140	Apart	Near	Pecora
			CH240-408M14	2	6490708	6642187
2	79680106	79682118	CH240-391O22	2	72615141	72795032	Near	Near	Ruminant
			CH240-316L9	2	79770736	79899446
2	121074809	121081227	CH240-458C8	2	120196278	120341735	Apart	Near	Pecora
			CH240-458D23	2	126282902	126463790
3	112964896	112978313	CH240-178E19	3	107186438	107325079	Apart (diff chr)	Near	Pecora
			CH240-297A4	3	113001206	113182135
4	7662482	7663863	CH240-232C24	4	5420544	5588548	Near	Near	Ruminant
			CH240-319B20	4	9241847	9422091
4	75142301	75144546	CH240-421F6	4	74856041	74991962	Near	Near	Ruminant
			CH240-436P22	4	77335934	77509956
4	83474575	83485309	CH240-433H10	4	79421129	79591588	Near	Near	Ruminant
			CH240-261D12	4	93441117	93646078
5	25352926	25372318	CH240-457A14	5	26138772	26282300	Near	Near	Ruminant
			CH240-383F16	5	25175397	25332338
5	42790428	42803999	CH240-362K16	5	38227033	38386289	Near	Near	Ruminant
			CH240-177J18	5	43307861	43423414
5	60304455	60312222	CH240-359K17	5	60117866	60267865	Near	Near	Ruminant
			CH240-383D2	5	62007254	62136377
5	76336680	76359171	CH240-28J13	5	70361182	70512042	Near	Near	Ruminant
			CH240-464I23	5	79224855	79353985
6	3347088	3353146	CH240-83G16	6	1413556	1573643	268P20-60K13 map together	Near	Pecora
			CH240-268P20	6	5111440	5270969
6	38457747	38549660	CH240-356H18	6	30452201	30600431	Apart	Near	Pecora
			CH240-60K13	6	38371798	38636669
			CH240-247C3	6	44854525	45009174
7	2416311	2419791	CH240-449P6	7	771908	907586	Near	Near	Ruminant
			CH240-41B24	7	2920583	3117169
7	22811030	22837466	CH240-498H22	7	21657596	21862648	diff on hom chr	Near	Pecora
			CH240-90G18	7	30285538	30458479
7	45929131	46021591	CH240-399F12	7	46074647	46234087	Apart (diff chr)	Near	Pecora
			CH240-319F20	7	45019130	45171414
7	82841355	82843425	CH240-148F17	7	72635879	72841831	Apart	Near	Pecora
			CH240-144G11	7	82837653	83061813
			CH240-230K21	7	90680535	90825315
8	8308387	8311151	CH240-117C23	8	8094452	8233229	Near	Near	Ruminant
			CH240-72O9	8	9552380	9699376
8	11060794	11073278	CH240-327G10	8	10156877	10302382	Apart	Near	Pecora
			CH240-151K21	8	10990031	11147017
			CH240-310J4	8	16180475	16349435
8	76044616	76045604	CH240-408G1	8	74116087	74241028	Apart	Near	Pecora
			CH240-37A7	8	77206914	77372216
9	66551681	66556874	CH240-183J17	9	65456596	65609445	Apart	Near	Pecora
			CH240-58F9	9	66363393	66572907
			CH240-243C19	9	67642212	67771079
10	6272299	6281691	CH240-374D22	10	8929821	9106165	Near	Near	Ruminant
			CH240-228L12	10	5804612	5953968
10	11199905	11278801	CH240-161B24	10	11348809	11529348	10.3-10.8 map together	Near	Pecora
			CH240-364G8	10	69396441	69552337
10	11816825	11818433	CH240-336K18	10	14097946	14258689	Near	Near	Ruminant
			CH240-323G9	10	11631734	11815580
10	20550728	20552426	CH240-290N22	10	20206189	20384971	Near	Near	Ruminant
			CH240-134C18	10	20790554	20925829
10	38547228	38548775	CH240-472I24	10	32762194	32902391	Near	Near	Ruminant
			CH240-454B13	10	39871461	39995666
10	45232624	45237412	CH240-147B23	10	43590188	43687268	Near	Near	Ruminant
			CH240-422A3	10	49628680	49760917
10	65667876	65685217	CH240-248J18	10	61991952	62151916	Apart	Near	Pecora
			CH240-364G8	10	69396441	69552337
11	14166606	14166837	CH240-376C13	11	13849039	14002518	Near	Near	Ruminant
			CH240-338D17	11	14957713	15107361
13	37514327	37521943	CH240-134L6	13	37102435	37254451	Near	Near	Ruminant
			CH240-260G21	13	37557833	37728944
13	43242646	43243680	CH240-19L1	13	40970998	41136347	Near	Near	Ruminant
			CH240-349I1	13	47090416	47257168
13	60204961	60205778	CH240-380G16	13	62397580	62535850	Near	Near	Ruminant
			CH240-325G18	13	57964494	58129525
14	46980191	46985128	CH240-406K11	14	41949374	42107357	Apart	Near	Pecora
			CH240-182H24	14	50740402	50868303
14	83298817	83299928	CH240-475F20	14	74626528	74775449	Apart	Near	Pecora
			CH240-218H17	14	83371244	83523850
15	1740856	1758388	CH240-369H20	15	1385929	1529895	Near	Near	Ruminant
			CH240-405H3	15	1938232	2117722
15	34915369	34918770	CH240-392O6	15	26098254	26252376	Apart	Near	Pecora
			CH240-431H21	15	36937681	37093277
16	36704750	36705929	CH240-303K1	16	34414126	34573705	16.1-16.4 map together	Near	Pecora
			CH240-12C17	16	38330341	38443976
16	41883767	41889498	CH240-425I13	16	40638468	40790526	Apart	Near	Pecora
			CH240-437K9	16	43656891	43851228
16	52840597	52852195	CH240-360A16	16	52622797	52796269	Apart	Near	Pecora
			CH240-247I14	16	52890548	53049080
16	77789205	77818230	CH240-420E14	16	74912414	75095049	16.1-16.4 map together	Near	Pecora
			CH240-448J17	16	77682665	77819261
17	36617912	36624385	CH240-388B21	17	36155124	36322656	Near	Near	Ruminant
			CH240-334O11	17	40484496	40660129
18	1395353	1408333	CH240-114F16	18	858534	1061531	Apart	Near	Pecora
			CH240-31F11	18	7687137	7847704
18	40329462	40363076	CH240-398J10	18	38092456	38181930	Apart	Near	Pecora
			CH240-331N1	18	40918330	41081931
18	62186408	62191710	CH240-413D12	18	55946830	56127770	Near	Near	Ruminant
			CH240-416H6	18	62507514	62686958
21	35107114	35108358	CH240-351C6	21	33673763	33867237	Near	Near	Ruminant
			CH240-222K16	21	35432838	35631143
21	56500486	56500730	CH240-105M19	21	55805710	55989065	Apart	Near	Pecora
			CH240-337F23	21	57188826	57346760
22	16637985	16653690	CH240-276C16	22	16424543	16544610	Near	Near	Ruminant
			CH240-338H23	22	16859056	17031270
24	12785942	12789335	CH240-14N11	24	11790232	11918237	Near	Near	Ruminant
			CH240-319O19	24	19680041	19843680
24	44089202	44090735	CH240-346J13	24	44805023	44952827	Near	Near	Ruminant
			CH240-372J14	24	41867892	42015956
28	3994900	4064084	CH240-356P8	28	3674010	3839216	Near	Near	Ruminant
			CH240-291I8	28	7355306	7536015
29	33512576	33533155	CH240-508J11	29	32588018	32746545	Near	Near	Ruminant
			CH240-252O21	29	34484300	34643845
