# Supplementary material for: Evolution of gene regulation in ruminants differs between evolutionary breakpoint regions and homologous synteny blocks
Source: HighWire-hosted journal article supplement (doi:10.1101/gr.239863.118), 2019-02-13
Supplement: Supplemental_Table_S6.xlsx [file Supplemental_Table_S6.xlsx]

## Sheet: Cattle_contractions
Supplemental Table 6. Gene family expansions and contractions in the lineages from the cetartiodactyl ancestor.
Cattle gene contractions
symbol	GO annotation	Pantholops hodgsonii	Ovis aries	Capra hircus	Oryx gazella	Bos grunniens	Bos taurus	Elaphurus davidianus	Muntiacus muntjak	Giraffa camelopardalis	Balaenoptera acutorostrata	Sus scrofa	Camelus ferus	Equus caballus	Homo sapiens	Rattus norvegicus	Mus musculus	Gene cluster
DMBT1	GO:0005044; scavenger receptor activity; Molecular Function.GO:0016020; membrane; Cellular Component	4	3	8	3	9	2	3	3	1	2	1	3	2	0	1	0	ENSBTAP00000015890-D1_GRUNN,BACU004721_WHALE,KB018224.1_cdsid_EPY74220.1_CAMEL,GOAT_ENSBTAP00000021056-D2_GOATS,PHO00000244_CHIRU,Muntiacus_muntjak_NA_10000318_MUNTJ,ENSBTAP00000052573-D42_GRUNN,BACU015276_WHALE,PHO00017795_CHIRU,ENSECAT00000008340_HORSE,GOAT_ENSBTAP00000050425-D5_GOATS,Oryx_gazella_NA_10019141_GAZEL,PHO00000574_CHIRU,Giraffe_NA_10011800_GIRAF,GOAT_ENSBTAP00000049192-D2_GOATS,ENS…
OR2A2,OR2A5,OR2A12,OLFR13,OR2A14,OR2A25,OR2A1,OR2A42,OR2A7,OR2A4	GO:0004984; olfactory receptor activity; Molecular Function.GO:0007186; G-protein coupled receptor protein signaling pathway; Biological Process.GO:0016021; integral to membrane; Cellular Component.GO:0004977; melanocortin receptor activity; Molecular Function	11	14	13	12	16	6	14	12	10	2	5	9	13	9	8	11	SHEEP_ENSBTAP00000052262-D2_SHEEP,Oryx_gazella_OR2A2_10002090_GAZEL,ENST00000408949_HUMAN,ENSBTAP00000048406-D91_GRUNN,Deer_GLEAN_10019460_DAVID,Deer_GLEAN_10019458_DAVID,PHO00010670_CHIRU,ENSSSCP00000022808_SWINE,PHO00010677_CHIRU,sheep_GLEAN_10002293_SHEEP,GOAT_ENSP00000386209-D4_GOATS,Oryx_gazella_OR2A5_10002096_GAZEL,ENSP00000420502-D14_GRUNN,ENSRNOT00000007200_RATTU,GOAT_ENSP00000386208-D4_G…
OR2B8P,OR2I1P	GO:0004984; olfactory receptor activity; Molecular Function.GO:0007186; G-protein coupled receptor protein signaling pathway; Biological Process.GO:0016021; integral to membrane; Cellular Component.NA	0	0	1	3	2	0	0	0	1	0	0	3	0	0	0	0	Giraffe_OR2B8P_10000808_GIRAF,KB018504.1_cdsid_EPY73676.1_CAMEL,Oryx_gazella_OR2I1P_10000633_GAZEL,Oryx_gazella_OR2I1P_10000634_GAZEL,ENSP00000399545-D43_GRUNN,KB017799.1_cdsid_EPY75415.1_CAMEL,Oryx_gazella_OR2B8P_10004395_GAZEL,ENSBTAP00000051832-D17_GRUNN,KB019733.1_cdsid_EPY72785.1_CAMEL,GOAT_ENSBTAP00000022884-D2_GOATS
OR6V1,OR9A4,OR9A2,OR6S1,OR6M1,OR6X1,OR6J1,OR6T1	GO:0004984; olfactory receptor activity; Molecular Function.GO:0007186; G-protein coupled receptor protein signaling pathway; Biological Process.GO:0016021; integral to membrane; Cellular Component.GO:0003824; catalytic activity; Molecular Function.GO:0004252; serine-type endopeptidase activity; Molecular Function.GO:0006508; proteolysis; Biological Process	12	10	9	8	15	9	12	9	7	1	17	9	10	8	4	5	KB017062.1_cdsid_EPY80742.1_CAMEL,PHO00017050_CHIRU,KB017062.1_cdsid_EPY80741.1_CAMEL,ENSBTAP00000051620-D44_GRUNN,SHEEP_ENSBTAP00000004771-D4_SHEEP,ENSBTAT00000020136_BOVIN,GOAT_ENSBTAP00000004771-D4_GOATS,SHEEP_ENSBTAP00000050527-D11_SHEEP,ENSMUST00000048478_MOUSE,KB016757.1_cdsid_EPY84480.1_CAMEL,ENSECAT00000007680_HORSE,ENSBTAT00000053265_BOVIN,ENSBTAT00000055754_BOVIN,ENSSSCP00000016069_SWIN…
OR8H3,OR8I2,OR5AU1,OR5F1,OLFR1030,OR8H2,OR8H1	GO:0004984; olfactory receptor activity; Molecular Function.GO:0007186; G-protein coupled receptor protein signaling pathway; Biological Process.GO:0016021; integral to membrane; Cellular Component	9	8	8	10	21	8	5	7	6	3	13	7	4	6	9	7	ENSRNOT00000043964_RATTU,ENSRNOT00000015439_RATTU,PHO00008128_CHIRU,ENSMUST00000099872_MOUSE,Oryx_gazella_OR8H3_10000890_GAZEL,ENSMUST00000094913_MOUSE,ENST00000313472_HUMAN,Muntiacus_muntjak_OR8I2_10003340_MUNTJ,ENSBTAP00000052264-D1_GRUNN,ENSBTAP00000047535-D70_GRUNN,BACU008977_WHALE,ENSSSCP00000021315_SWINE,Oryx_gazella_OR5F1_10001803_GAZEL,ENSRNOT00000013150_RATTU,SHEEP_ENSP00000323982-D2_SHE…
OR8S1,OLFR1002	GO:0004984; olfactory receptor activity; Molecular Function.GO:0007186; G-protein coupled receptor protein signaling pathway; Biological Process.GO:0016021; integral to membrane; Cellular Component.GO:0004978; adrenocorticotropin receptor activity; Molecular Function	9	15	12	15	21	10	19	7	6	5	13	5	15	1	6	5	sheep_GLEAN_10004478_SHEEP,BACU007975_WHALE,GOAT_ENSBTAP00000050658-D13_GOATS,PHO00018967_CHIRU,ENSECAT00000007968_HORSE,Muntiacus_muntjak_OR8S1_10000462_MUNTJ,Oryx_gazella_OR8S1_10001536_GAZEL,SHEEP_ENSBTAP00000038114-D2_SHEEP,ENSBTAT00000021705_BOVIN,PHO00019003_CHIRU,Giraffe_OR8S1_10018769_GIRAF,Muntiacus_muntjak_OR8S1_10001379_MUNTJ,GOAT_ENSBTAP00000049053-D2_GOATS,PHO00001119_CHIRU,Deer_GLEA…
OLFR4OLFR502,OLFR508,OLFR491,OLFR478,OLFR481,OLFR502,OR5P3,OR5P2	GO:0004984; olfactory receptor activity; Molecular Function.GO:0007186; G-protein coupled receptor protein signaling pathway; Biological Process.GO:0016021; integral to membrane; Cellular Component	10	13	10	11	13	8	10	7	4	2	11	9	16	2	29	29	ENSP00000357134-D100_GRUNN,SHEEP_ENSP00000320560-D8_SHEEP,ENSMUST00000073580_MOUSE,yakA03389_GRUNN,ENSRNOT00000048370_RATTU,ENSBTAT00000054036_BOVIN,ENSSSCP00000015522_SWINE,Deer_GLEAN_10013902_DAVID,Muntiacus_muntjak_Olfr502_10004574_MUNTJ,ENSECAT00000006116_HORSE,KB016793.1_cdsid_EPY84030.1_CAMEL,ENSMUST00000075704_MOUSE,ENSMUST00000071658_MOUSE,Oryx_gazella_Olfr491_10001220_GAZEL,Deer_GLEAN_10…
OR5B12,OR5B2,OR5B17,OR5B3,OR5B21	GO:0004984; olfactory receptor activity; Molecular Function.GO:0007186; G-protein coupled receptor protein signaling pathway; Biological Process.GO:0016021; integral to membrane; Cellular Component	14	14	14	11	17	12	19	11	6	2	10	12	11	5	21	32	ENSBTAP00000017951-D5_GRUNN,ENSECAT00000007712_HORSE,ENSSSCP00000013989_SWINE,ENSMUST00000056005_MOUSE,ENSSSCP00000013988_SWINE,ENST00000302581_HUMAN,ENSECAT00000007563_HORSE,PHO00009192_CHIRU,SHEEP_ENSBTAP00000052980_SHEEP,ENSMUST00000075868_MOUSE,GOAT_ENSP00000349945-D4_GOATS,ENSBTAP00000049086-D70_GRUNN,ENSBTAT00000056317_BOVIN,ENSMUST00000049724_MOUSE,ENSSSCP00000027723_SWINE,GOAT_ENSBTAP0000…
OR5K3,OR5K4,OR5AC1,OR5H1,OR5AC2,OR5H6,OR5H15,OR5K2,OR5H14,OR5K1,OR5H2	NA.GO:0004984; olfactory receptor activity; Molecular Function.GO:0007186; G-protein coupled receptor protein signaling pathway; Biological Process.GO:0016021; integral to membrane; Cellular Component	14	19	12	3	20	8	5	1	0	0	26	3	12	10	31	25	GOAT_ENSP00000347418-D15_GOATS,ENSRNOT00000041491_RATTU,ENSBTAT00000008047_BOVIN,ENSECAT00000005624_HORSE,GOAT_ENSP00000373196-D16_GOATS,KB017828.1_cdsid_EPY75329.1_CAMEL,ENSMUST00000058564_MOUSE,SHEEP_ENSP00000373196-D5_SHEEP,ENSRNOT00000060875_RATTU,ENSMUST00000084791_MOUSE,SHEEP_ENSP00000373196_SHEEP,PHO00014878_CHIRU,ENSECAT00000005744_HORSE,ENSMUST00000114343_MOUSE,ENSRNOT00000048289_RATTU,S…
NA	NA	0	1	0	0	2	0	0	0	0	0	0	0	0	0	0	0	sheep_GLEAN_10005261_SHEEP,ENSP00000389046-D92_GRUNN,ENSP00000389046-D47_GRUNN
OR8B3,OLFR145,OR8B12,OR8B4,OLFR143,OLFR147,OR8G5,OR8B8,OR8B2	GO:0004984; olfactory receptor activity; Molecular Function.GO:0007186; G-protein coupled receptor protein signaling pathway; Biological Process.GO:0016021; integral to membrane; Cellular Component	18	28	25	13	29	20	29	24	13	2	22	10	24	5	56	43	ENSECAT00000004436_HORSE,ENSSSCP00000025631_SWINE,Muntiacus_muntjak_Olfr145_10023313_MUNTJ,ENSECAT00000005113_HORSE,Muntiacus_muntjak_OR8B4_10023344_MUNTJ,KB016450.1_cdsid_EPY88782.1_CAMEL,Muntiacus_muntjak_OR8B3_10023340_MUNTJ,ENSBTAP00000051977-D12_GRUNN,PHO00003265_CHIRU,Muntiacus_muntjak_OR8B3_10023338_MUNTJ,ENSBTAT00000050119_BOVIN,ENSBTAT00000006850_BOVIN,ENSRNOT00000060027_RATTU,ENSECAT000…
OR1J2,OR1J4,OR1J1,OR1B1,OR1E2,OR1E5,OR1E1	GO:0004984; olfactory receptor activity; Molecular Function.GO:0007186; G-protein coupled receptor protein signaling pathway; Biological Process.GO:0016021; integral to membrane; Cellular Component	18	17	18	23	24	19	16	24	18	4	30	10	24	5	43	32	GOAT_ENSP00000303151-D2_GOATS,ENSRNOT00000010341_RATTU,ENSRNOT00000048374_RATTU,ENSSSCP00000027491_SWINE,PHO00015238_CHIRU,Deer_GLEAN_10010286_DAVID,ENSRNOT00000052114_RATTU,Muntiacus_muntjak_OR1J4_10014644_MUNTJ,ENSSSCP00000005944_SWINE,ENSMUST00000120137_MOUSE,ENSSSCP00000006281_SWINE,Giraffe_OR1J2_10006132_GIRAF,ENSMUST00000120303_MOUSE,Deer_GLEAN_10015423_DAVID,ENSRNOT00000046925_RATTU,ENSRNO…
OR7E24,OLFR18,OR7A10,OR7D2,OR7C1,OR7C2,OR7D4,AC006271.2	GO:0004984; olfactory receptor activity; Molecular Function.GO:0007186; G-protein coupled receptor protein signaling pathway; Biological Process.GO:0016021; integral to membrane; Cellular Component.GO:0004978; adrenocorticotropin receptor activity; Molecular Function	15	18	9	10	23	14	25	6	5	4	34	6	25	6	23	18	SHEEP_ENSBTAP00000049001_SHEEP,ENSSSCP00000014562_SWINE,Deer_GLEAN_10012657_DAVID,ENSP00000303822-D83_GRUNN,goat_GLEAN_10008163_GOATS,Deer_GLEAN_10000122_DAVID,ENSRNOT00000044249_RATTU,ENSMUST00000071725_MOUSE,ENSSSCP00000014704_SWINE,Oryx_gazella_Olfr18_10000132_GAZEL,Deer_GLEAN_10012675_DAVID,ENSBTAT00000057086_BOVIN,Deer_GLEAN_10012664_DAVID,ENSSSCP00000014535_SWINE,GOAT_ENSP00000248073_GOATS,…
OR7A10,OR7A17,OR7C2,OR7A5,OR7A2P	GO:0004984; olfactory receptor activity; Molecular Function.GO:0007186; G-protein coupled receptor protein signaling pathway; Biological Process.GO:0016021; integral to membrane; Cellular Component.GO:0003735; structural constituent of ribosome; Molecular Function.GO:0005622; intracellular; Cellular Component.GO:0005840; ribosome; Cellular Component.GO:0006412; translation; Biological Process	48	28	21	21	66	40	43	21	13	1	32	9	9	4	11	8	Oryx_gazella_OR7A17_10007107_GAZEL,SHEEP_ENSP00000328144-D3_SHEEP,ENSBTAT00000064850_BOVIN,GOAT_ENSBTAP00000046656-D5_GOATS,PHO00009347_CHIRU,PHO00009364_CHIRU,Giraffe_OR7A10_10003246_GIRAF,Oryx_gazella_OR7A10_10006898_GAZEL,Oryx_gazella_OR7A17_10001232_GAZEL,ENSBTAT00000063735_BOVIN,ENSSSCP00000023768_SWINE,ENSBTAT00000054308_BOVIN,ENSBTAP00000050927-D68_GRUNN,ENSP00000303195-D78_GRUNN,Oryx_gaze…
OR7G3,OR7G1,OR7G2	GO:0004984; olfactory receptor activity; Molecular Function.GO:0007186; G-protein coupled receptor protein signaling pathway; Biological Process.GO:0016021; integral to membrane; Cellular Component.GO:0003676; nucleic acid binding; Molecular Function.GO:0005622; intracellular; Cellular Component.GO:0006355; regulation of transcription, DNA-dependent; Biological Process	8	7	8	6	11	4	10	8	7	4	4	7	13	3	27	18	ENSMUST00000063923_MOUSE,Muntiacus_muntjak_OR7G1_10002196_MUNTJ,ENSRNOT00000048500_RATTU,GOAT_ENSBTAP00000002518-D3_GOATS,SHEEP_ENSBTAP00000047600-D2_SHEEP,Muntiacus_muntjak_OR7G1_10002197_MUNTJ,ENSRNOT00000049712_RATTU,ENSSSCP00000027522_SWINE,ENSMUST00000061693_MOUSE,ENSECAT00000003909_HORSE,KB016705.1_cdsid_EQB77659.1_CAMEL,ENSRNOT00000045458_RATTU,PHO00013342_CHIRU,ENSRNOT00000008594_RATTU,EN…
OR2Z1,OR2AG1,OR2V1,OR2T29,OR2V2,OR2T3,OR2T2,OR2M2,OR2M4,OR2T1,OR2T27,OR2T12,OR2T6,OR2T34,OR2T8,OR2T33,OR2T4,OR2T11,OR2M3,OR2AG2,OR2T35,OR2M7,OR2T5,OR2M5,OR2T10	GO:0004984; olfactory receptor activity; Molecular Function.GO:0007186; G-protein coupled receptor protein signaling pathway; Biological Process.GO:0016021; integral to membrane; Cellular Component.GO:0000786; nucleosome; Cellular Component.GO:0003677; DNA binding; Molecular Function.GO:0005634; nucleus; Cellular Component.GO:0006334; nucleosome assembly; Biological Process.GO:0006352; transcript…	36	37	35	30	42	36	36	31	18	3	36	19	32	25	34	30	ENSBTAT00000028103_BOVIN,Oryx_gazella_OR2T8_10006980_GAZEL,ENSECAT00000001502_HORSE,ENSECAT00000001314_HORSE,ENSP00000324687-D2_GRUNN,ENSP00000355431-D2_GRUNN,ENST00000359682_HUMAN,ENSECAT00000001181_HORSE,ENSRNOT00000051126_RATTU,ENSBTAT00000064254_BOVIN,Oryx_gazella_OR2T2_10006982_GAZEL,Muntiacus_muntjak_OR2V2_10002874_MUNTJ,SHEEP_ENSBTAP00000050260_SHEEP,BACU004873_WHALE,ENSRNOT00000050693_RAT…
OR4P4,OR4S2,OR4X2,OR4B1,OR4X1,OR4C16,OR4C11,OR4C3,OR4S1	GO:0004984; olfactory receptor activity; Molecular Function.GO:0007186; G-protein coupled receptor protein signaling pathway; Biological Process.GO:0016021; integral to membrane; Cellular Component.GO:0020037; heme binding; Molecular Function	18	16	18	12	35	21	33	25	8	2	30	20	13	8	35	28	Muntiacus_muntjak_OR4P4_10000548_MUNTJ,ENSRNOT00000040581_RATTU,Muntiacus_muntjak_OR4S2_10002891_MUNTJ,Deer_GLEAN_10003242_DAVID,KB018189.1_cdsid_EPY74267.1_CAMEL,ENSP00000321419-D43_GRUNN,Muntiacus_muntjak_OR4P4_10000555_MUNTJ,PHO00021384_CHIRU,SHEEP_ENSBTAP00000049640_SHEEP,Muntiacus_muntjak_OR4P4_10019746_MUNTJ,Deer_GLEAN_10001007_DAVID,ENSMUST00000099750_MOUSE,ENSRNOT00000050785_RATTU,Muntiac…
OR2F1	NA.GO:0007186; G-protein coupled receptor protein signaling pathway; Biological Process.GO:0016021; integral to membrane; Cellular Component	4	0	0	1	1	0	2	1	0	0	0	2	0	0	0	0	Deer_GLEAN_10019441_DAVID,Deer_GLEAN_10019440_DAVID,PHO00010662_CHIRU,ENSP00000389046-D49_GRUNN,KB017062.1_cdsid_EPY80754.1_CAMEL,Muntiacus_muntjak_OR2F1_10004676_MUNTJ,PHO00010686_CHIRU,PHO00010685_CHIRU,PHO00010663_CHIRU,Oryx_gazella_OR2F1_10004785_GAZEL,KB017062.1_cdsid_EPY80757.1_CAMEL
OR4K3,OR4K15,OR4K5,OR4K14,OR4L1,OR4K2,OR4K17,OR4K1,OR4K13,OR4F4,OR4F17,OR4F5	GO:0004984; olfactory receptor activity; Molecular Function.GO:0007186; G-protein coupled receptor protein signaling pathway; Biological Process.GO:0016021; integral to membrane; Cellular Component	23	20	21	15	19	10	17	7	2	3	40	16	24	11	23	26	sheep_GLEAN_10009419_SHEEP,ENSP00000319217-D27_GRUNN,Deer_GLEAN_10011160_DAVID,GOAT_ENSP00000304077-D9_GOATS,ENSECAT00000007101_HORSE,SHEEP_ENSBTAP00000017630_SHEEP,KB017655.1_cdsid_EPY76212.1_CAMEL,ENSMUST00000075030_MOUSE,ENSECAT00000006494_HORSE,Oryx_gazella_OR4K3_10002632_GAZEL,Deer_GLEAN_10011152_DAVID,ENSRNOT00000016702_RATTU,KE538393.1_cdsid_EPY72439.1_CAMEL,ENST00000315693_HUMAN,ENSRNOT00…
OR4A15,OR4C46,OR4A47,OLFR140,OR4C15,OR4C13,OR4C12,OR4C45,OR4C6,OR4A4P,OR4A16,OR4C3,OR4C5,OR4A5	GO:0004984; olfactory receptor activity; Molecular Function.GO:0007186; G-protein coupled receptor protein signaling pathway; Biological Process.GO:0016021; integral to membrane; Cellular Component	21	34	13	22	65	34	64	42	7	0	26	39	9	11	56	55	Deer_GLEAN_10005530_DAVID,Deer_GLEAN_10003622_DAVID,Muntiacus_muntjak_OR4C46_10021749_MUNTJ,Deer_GLEAN_10012468_DAVID,Deer_GLEAN_10003888_DAVID,ENSRNOT00000049678_RATTU,Oryx_gazella_Olfr140_10000481_GAZEL,ENSBTAT00000063970_BOVIN,ENSRNOT00000047910_RATTU,sheep_GLEAN_10012443_SHEEP,Muntiacus_muntjak_OR4C46_10001089_MUNTJ,ENSSSCP00000015425_SWINE,Oryx_gazella_OR4C46_10001387_GAZEL,ENSSSCP0000002323…
OR6C4,OR6C76,OR6C1,OR2AP1,OR6C2,OR6C75,OR6C3,OR6C74,OR6C68,OR6C70,OR6C65,OR6C6	GO:0003924; GTPase activity; Molecular Function.GO:0004984; olfactory receptor activity; Molecular Function.GO:0005525; GTP binding; Molecular Function.GO:0007186; G-protein coupled receptor protein signaling pathway; Biological Process.GO:0016021; integral to membrane; Cellular Component.GO:0003746; translation elongation factor activity; Molecular Function.GO:0005853; eukaryotic translation elo…	51	34	32	22	60	44	22	5	9	1	54	16	53	12	70	48	ENSSSCP00000000364_SWINE,ENSBTAP00000008284-D24_GRUNN,ENSRNOT00000043396_RATTU,ENSBTAT00000044037_BOVIN,ENSSSCP00000020554_SWINE,Deer_GLEAN_10000469_DAVID,ENSRNOT00000012866_RATTU,ENSRNOT00000049493_RATTU,PHO00015856_CHIRU,SHEEP_ENSBTAP00000051071-D3_SHEEP,PHO00015918_CHIRU,Deer_GLEAN_10003236_DAVID,ENSSSCP00000022081_SWINE,ENSBTAT00000055881_BOVIN,ENSMUST00000076508_MOUSE,ENSRNOT00000051053_RATT…
OR56A1,OLFR688,OR56A4,OR56B2P,OR56A3,OR56B4,OR56B1,AC111177.1	GO:0004984; olfactory receptor activity; Molecular Function.GO:0007186; G-protein coupled receptor protein signaling pathway; Biological Process.GO:0016021; integral to membrane; Cellular Component.GO:0004977; melanocortin receptor activity; Molecular Function.GO:0004949; cannabinoid receptor activity; Molecular Function	6	16	15	7	17	10	13	15	6	1	13	5	8	6	10	12	ENSSSCP00000015576_SWINE,Oryx_gazella_OR56A3_10004621_GAZEL,PHO00007731_CHIRU,ENSMUST00000071242_MOUSE,Muntiacus_muntjak_OR56B2P_10001052_MUNTJ,ENSBTAP00000050769-D2_GRUNN,ENSP00000321246-D7_GRUNN,sheep_GLEAN_10003312_SHEEP,Giraffe_OR56A1_10002330_GIRAF,Deer_GLEAN_10006212_DAVID,ENST00000329564_HUMAN,ENSRNOT00000046417_RATTU,GOAT_ENSP00000321246-D7_GOATS,ENSP00000321246-D2_GRUNN,ENSSSCP0000001558…
NA	NA	4	0	4	0	1	0	0	0	0	0	0	1	1	0	1	0	PHO00015910_CHIRU,ENSECAT00000005134_HORSE,ENSBTAP00000001484-D25_GRUNN,KB016687.1_cdsid_EPY85124.1_CAMEL,PHO00015905_CHIRU,PHO00015855_CHIRU,PHO00015853_CHIRU,GOAT_ENSBTAP00000041536-D50_GOATS,GOAT_ENSBTAP00000048432-D45_GOATS,GOAT_ENSBTAP00000001484-D8_GOATS,GOAT_ENSBTAP00000013188-D49_GOATS,ENSRNOT00000042068_RATTU
OR51F2,OR51L1,OR51G2,OR51I2,OR51A4,OR51I1,OR51F1,OR51H1P,OR51A7,OR51G1,OR51J1,OR52K2,OR52K1,OR51T1,OR51A2,AC103710.1,OR51C1P	GO:0004984; olfactory receptor activity; Molecular Function.GO:0007186; G-protein coupled receptor protein signaling pathway; Biological Process.GO:0016021; integral to membrane; Cellular Component.GO:0004977; melanocortin receptor activity; Molecular Function	37	34	33	34	53	35	37	44	29	3	34	30	32	14	27	31	PHO00020943_CHIRU,ENSSSCP00000023982_SWINE,Oryx_gazella_OR51I2_10004209_GAZEL,Deer_GLEAN_10018945_DAVID,ENSSSCP00000015698_SWINE,SHEEP_ENSP00000318956-D4_SHEEP,ENSBTAT00000026039_BOVIN,SHEEP_ENSBTAP00000048734_SHEEP,PHO00021023_CHIRU,KB016421.1_cdsid_EPY89270.1_CAMEL,Muntiacus_muntjak_OR51I2_10003253_MUNTJ,ENSMUST00000051505_MOUSE,Muntiacus_muntjak_OR51F1_10003247_MUNTJ,PHO00020925_CHIRU,ENSBTAT0…
OR51I2,OR51Q1,OR51G1,OR51I1	GO:0004984; olfactory receptor activity; Molecular Function.GO:0007186; G-protein coupled receptor protein signaling pathway; Biological Process.GO:0016021; integral to membrane; Cellular Component.NA	0	1	1	2	2	0	0	2	1	0	0	0	0	0	0	0	SHEEP_ENSP00000322088-D20_SHEEP,ENSBTAP00000051909-D72_GRUNN,Oryx_gazella_OR51Q1_10004208_GAZEL,Muntiacus_muntjak_OR51Q1_10000851_MUNTJ,GOAT_ENSP00000300773-D37_GOATS,Giraffe_OR51I2_10003048_GIRAF,ENSBTAP00000047928-D22_GRUNN,Muntiacus_muntjak_OR51I1_10000853_MUNTJ,Oryx_gazella_OR51G1_10008237_GAZEL
VN1R4,CFC1,VN1R2,TARM1,VN1R1	GO:0007186; G-protein coupled receptor protein signaling pathway; Biological Process.GO:0016021; integral to membrane; Cellular Component.GO:0016503; pheromone receptor activity; Molecular Function	23	14	17	3	29	16	11	3	4	1	10	4	15	3	54	143	Muntiacus_muntjak_TARM1_10006624_MUNTJ,ENSMUST00000168398_MOUSE,ENSMUST00000062811_MOUSE,ENSECAT00000000844_HORSE,Giraffe_VN1R4_10000104_GIRAF,ENSMUST00000167253_MOUSE,ENSMUST00000049819_MOUSE,ENSMUST00000050416_MOUSE,ENSMUST00000173886_MOUSE,ENSMUST00000172551_MOUSE,PHO00021506_CHIRU,ENSMUST00000078475_MOUSE,ENSSSCP00000006179_SWINE,ENSMUST00000168926_MOUSE,ENSMUST00000075053_MOUSE,ENSBTAT000000…
TAS1R1,CASR,VMN2R26,TAS1R2,TAS1R3,VMN2R1,GPRC6A	GO:0004930; G-protein coupled receptor activity; Molecular Function.GO:0007186; G-protein coupled receptor protein signaling pathway; Biological Process.GO:0016021; integral to membrane; Cellular Component.GO:0005513; detection of calcium ion; Biological Process.GO:0019722; calcium-mediated signaling; Biological Process	9	8	6	4	6	4	6	8	6	4	8	7	6	5	125	133	ENSRNOT00000052271_RATTU,ENSMUST00000032238_MOUSE,GOAT_ENSP00000331867_GOATS,ENSMUST00000166081_MOUSE,ENSMUST00000169805_MOUSE,ENSRNOT00000050241_RATTU,ENSRNOT00000041244_RATTU,ENSRNOT00000049498_RATTU,ENSMUST00000167314_MOUSE,ENSECAT00000012230_HORSE,ENSMUST00000095922_MOUSE,BACU006064_WHALE,ENSMUST00000170596_MOUSE,ENSRNOT00000047147_RATTU,ENSBTAP00000048747-D1_GRUNN,ENSRNOT00000034654_RATTU,Or…
GRM4,GRM5,GRM7,GRM8,GRM1	NA.GO:0004930; G-protein coupled receptor activity; Molecular Function.GO:0007186; G-protein coupled receptor protein signaling pathway; Biological Process.GO:0016021; integral to membrane; Cellular Component	3	4	4	4	4	0	2	3	5	4	4	4	0	0	1	0	sheep_GLEAN_10013680_SHEEP,KB017081.1_cdsid_EQB78418.1_CAMEL,ENSRNOT00000056573_RATTU,ENSSSCP00000027787_SWINE,Giraffe_GRM4_10019745_GIRAF,PHO00002546_CHIRU,goat_GLEAN_10006341_GOATS,Giraffe_GRM5_10006193_GIRAF,Oryx_gazella_Grm7_10020469_GAZEL,Muntiacus_muntjak_Grm1_10003966_MUNTJ,GOAT_ENSBTAP00000042640_GOATS,Deer_GLEAN_10003265_DAVID,goat_GLEAN_10011286_GOATS,ENSBTAP00000017342-D1_GRUNN,Muntiac…
EEF1A1,TUFM,GSPT2,EEF1A1P5,GSPT1,HBS1L,EEF1A2,TB10.70.5670,TUF1,EEF1A	GO:0003924; GTPase activity; Molecular Function.GO:0005525; GTP binding; Molecular Function.GO:0003746; translation elongation factor activity; Molecular Function.GO:0005622; intracellular; Cellular Component.GO:0006414; translational elongation; Biological Process.GO:0006071; glycerol metabolic process; Biological Process.GO:0006629; lipid metabolic process; Biological Process.GO:0008081; phosph…	11	17	13	25	15	12	23	16	19	17	11	12	10	5	10	6	Giraffe_EEF1A1_10010897_GIRAF,Deer_GLEAN_10000324_DAVID,Giraffe_EEF1A1_10020198_GIRAF,GOAT_ENSBTAP00000004656_GOATS,ENSECAT00000023944_HORSE,ENSECAT00000023029_HORSE,ENSMUST00000080030_MOUSE,Oryx_gazella_Tb10.70.5670_10001238_GAZEL,KB018160.1_cdsid_EPY74310.1_CAMEL,ENSECAT00000021985_HORSE,Oryx_gazella_EEF1A1_10000552_GAZEL,Muntiacus_muntjak_HBS1L_10005929_MUNTJ,SHEEP_ENSBTAP00000047147_SHEEP,BAC…
EEF1A1P5,EEF1A1,EEF1AS	GO:0003924; GTPase activity; Molecular Function.GO:0005525; GTP binding; Molecular Function.GO:0003676; nucleic acid binding; Molecular Function	0	1	3	2	2	0	4	3	3	1	0	1	0	1	0	0	Muntiacus_muntjak_eef1as_10000248_MUNTJ,yakG018853_GRUNN,Giraffe_EEF1A1P5_10001634_GIRAF,Muntiacus_muntjak_EEF1A1P5_10008526_MUNTJ,GOAT_ENSBTAP00000017825_GOATS,Oryx_gazella_EEF1A1_10023303_GAZEL,Deer_GLEAN_10006447_DAVID,sheep_GLEAN_10014894_SHEEP,Deer_GLEAN_10015798_DAVID,KB016534.1_cdsid_EPY87526.1_CAMEL,Giraffe_Eef1a1_10021307_GIRAF,goat_GLEAN_10005599_GOATS,BACU010482_WHALE,Giraffe_EEF1A1_10…
MSI1,HNRNPA2B1,HNRNPA1,MSI2,DAZAP1,HNRNPAB,HNRNPA3,HNRNPA0,HNRNPA1L2,HNRPDL,HNRNPD	GO:0003676; nucleic acid binding; Molecular Function.GO:0004623; phospholipase A2 activity; Molecular Function.GO:0005509; calcium ion binding; Molecular Function.GO:0016042; lipid catabolic process; Biological Process	21	17	21	13	29	20	26	18	15	26	16	10	11	11	54	13	SHEEP_ENSBTAP00000049936_SHEEP,PHO00007549_CHIRU,ENST00000233078_HUMAN,KB016830.1_cdsid_EPY83545.1_CAMEL,Giraffe_MSI1_10021451_GIRAF,KB016878.1_cdsid_EPY82950.1_CAMEL,BACU011153_WHALE,GOAT_ENSBTAP00000018540_GOATS,ENSRNOT00000055284_RATTU,PHO00013327_CHIRU,ENSMUST00000007980_MOUSE,Oryx_gazella_HNRNPA0_10022586_GAZEL,Giraffe_Hnrnpa2b1_10020280_GIRAF,PHO00001932_CHIRU,ENSSSCP00000025987_SWINE,ENSRN…
PPIB,PPIE,PPIH,PPID,PPIC,PPIA,PPIF,PPIL1,PPIL6,PPIL3,PPIAL4G,PPIG,PPIAL4A,PPIAL4B,PPIAL4C,PPIAL4D	GO:0003755; peptidyl-prolyl cis-trans isomerase activity; Molecular Function.GO:0003676; nucleic acid binding; Molecular Function.GO:0006457; protein folding; Biological Process.GO:0005515; protein binding; Molecular Function.GO:0003723; RNA binding; Molecular Function	13	21	19	16	20	12	20	14	15	21	15	16	13	15	24	14	ENST00000419275_HUMAN,ENSRNOT00000037890_RATTU,KB018423.1_cdsid_EPY73807.1_CAMEL,Giraffe_PPIB_10019541_GIRAF,Oryx_gazella_Ppif_10009438_GAZEL,ENSRNOT00000038446_RATTU,Giraffe_PPIE_10012685_GIRAF,ENSRNOT00000047599_RATTU,ENSMUST00000029382_MOUSE,Oryx_gazella_PPID_10013904_GAZEL,ENSRNOT00000023485_RATTU,BACU004449_WHALE,KB017120.1_cdsid_EPY80062.1_CAMEL,GOAT_ENSBTAP00000049897_GOATS,BACU010252_WHAL…
ZNF132,ZNF256,ZNF549,ZNF304,ZNF211,ZNF792,ZNF134,ZNF850,ZNF419,ZNF548,ZNF17,ZIK1,ZNF772,ZNF416,ZNF658,ZNF551,ZNF547,ZNF530,ZNF418,ZNF417,ZNF671,ZNF776,ZNF154,ZNF814,ZNF749	GO:0003676; nucleic acid binding; Molecular Function.GO:0005622; intracellular; Cellular Component.GO:0006355; regulation of transcription, DNA-dependent; Biological Process.GO:0008270; zinc ion binding; Molecular Function.GO:0003700; transcription factor activity; Molecular Function.GO:0005634; nucleus; Cellular Component.GO:0003700; sequence-specific DNA binding transcription factor activity; M…	13	5	6	11	21	13	10	12	12	25	9	0	21	22	2	3	BACU005985_WHALE,ENSMUST00000032551_MOUSE,Oryx_gazella_ZNF17_10015117_GAZEL,PHO00005183_CHIRU,GOAT_ENSBTAP00000049904-D48_GOATS,ENSBTAT00000004230_BOVIN,ENSP00000377171-D87_GRUNN,ENSBTAP00000004230-D1_GRUNN,Muntiacus_muntjak_ZNF850_10012877_MUNTJ,ENSECAT00000020753_HORSE,BACU017966_WHALE,Oryx_gazella_ZNF134_10015121_GAZEL,goat_GLEAN_10008521_GOATS,Muntiacus_muntjak_ZNF416_10012875_MUNTJ,ENST00000…
ZNF621,ZNF619,ZNF620	NA.GO:0003676; nucleic acid binding; Molecular Function.GO:0005622; intracellular; Cellular Component.GO:0006355; regulation of transcription, DNA-dependent; Biological Process.GO:0008270; zinc ion binding; Molecular Function.GO:0003735; structural constituent of ribosome; Molecular Function.GO:0005840; ribosome; Cellular Component.GO:0006412; translation; Biological Process	2	2	1	0	3	0	3	3	0	2	1	0	1	2	0	0	ENSECAT00000015322_HORSE,PHO00016084_CHIRU,SHEEP_ENSBTAP00000053023_SHEEP,SHEEP_ENSP00000340841_SHEEP,ENSP00000322265-D8_GRUNN,Muntiacus_muntjak_ZNF621_10017586_MUNTJ,ENSP00000340841-D1_GRUNN,PHO00016083_CHIRU,BACU015651_WHALE,Deer_GLEAN_10014013_DAVID,ENSSSCP00000021572_SWINE,Deer_GLEAN_10014014_DAVID,ENST00000314529_HUMAN,Muntiacus_muntjak_ZNF619_10017584_MUNTJ,goat_GLEAN_10018312_GOATS,Deer_GL…
ZNF883,AC018558.1	NA.GO:0005622; intracellular; Cellular Component.GO:0008270; zinc ion binding; Molecular Function	0	1	1	0	3	0	1	1	0	1	0	0	0	1	0	0	ENSP00000345637-D13_GRUNN,BACU010099_WHALE,ENSP00000407532-D52_GRUNN,ENSP00000350958-D47_GRUNN,Muntiacus_muntjak_ZNF883_10008194_MUNTJ,SHEEP_ENSP00000345637_SHEEP,ENST00000398617_HUMAN,Deer_GLEAN_10011387_DAVID,GOAT_ENSP00000345637_GOATS
ZNF566	GO:0003676; nucleic acid binding; Molecular Function.GO:0005622; intracellular; Cellular Component.GO:0006355; regulation of transcription, DNA-dependent; Biological Process.NA	0	1	11	0	1	0	3	0	1	2	1	1	0	0	3	0	Giraffe_ZNF566_10017819_GIRAF,ENSRNOT00000048885_RATTU,ENSRNOT00000041861_RATTU,GOAT_ENSP00000400651-D2_GOATS,KB016597.1_cdsid_EPY86607.1_CAMEL,GOAT_ENSP00000400651-D23_GOATS,GOAT_ENSP00000400651_GOATS,GOAT_ENSP00000400651-D3_GOATS,GOAT_ENSP00000400651-D13_GOATS,ENSRNOT00000066605_RATTU,Deer_GLEAN_10020124_DAVID,ENSSSCP00000003182_SWINE,GOAT_ENSP00000400651-D8_GOATS,GOAT_ENSP00000400651-D6_GOATS,…
ZNF596,ZNF705G,ZNF705A,ZNF705F	GO:0003676; nucleic acid binding; Molecular Function.GO:0005622; intracellular; Cellular Component.GO:0006355; regulation of transcription, DNA-dependent; Biological Process	0	0	0	1	2	0	0	2	1	0	0	0	0	0	0	0	Muntiacus_muntjak_ZNF705A_10003029_MUNTJ,Muntiacus_muntjak_ZNF705F_10000900_MUNTJ,Giraffe_ZNF596_10011639_GIRAF,ENSBTAP00000048235-D3_GRUNN,Oryx_gazella_ZNF705G_10001756_GAZEL,ENSBTAP00000052571-D1_GRUNN
NA	NA	0	37	1	1	1	0	0	0	0	0	0	0	0	0	0	0	sheep_GLEAN_10015861_SHEEP,sheep_GLEAN_10019800_SHEEP,sheep_GLEAN_10016819_SHEEP,sheep_GLEAN_10021223_SHEEP,sheep_GLEAN_10012785_SHEEP,sheep_GLEAN_10019803_SHEEP,sheep_GLEAN_10016509_SHEEP,sheep_GLEAN_10019774_SHEEP,sheep_GLEAN_10020047_SHEEP,sheep_GLEAN_10008256_SHEEP,sheep_GLEAN_10014043_SHEEP,sheep_GLEAN_10021530_SHEEP,sheep_GLEAN_10008685_SHEEP,sheep_GLEAN_10021895_SHEEP,sheep_GLEAN_10020817_…
RPL23A,AC139099.1	GO:0003735; structural constituent of ribosome; Molecular Function.GO:0005622; intracellular; Cellular Component.GO:0005840; ribosome; Cellular Component.GO:0006412; translation; Biological Process	3	17	16	12	23	8	20	13	27	4	2	14	3	2	15	19	Giraffe_Rpl23a_10000913_GIRAF,Muntiacus_muntjak_Rpl23a_10021222_MUNTJ,ENST00000422514_HUMAN,ENSBTAP00000050420-D10_GRUNN,Giraffe_Rpl23a_10013033_GIRAF,sheep_GLEAN_10007674_SHEEP,GOAT_ENSP00000400635_GOATS,Deer_GLEAN_10021128_DAVID,Deer_GLEAN_10017385_DAVID,sheep_GLEAN_10020449_SHEEP,ENSRNOT00000051510_RATTU,ENSP00000415110-D3_GRUNN,goat_GLEAN_10020666_GOATS,KB016867.1_cdsid_EPY83153.1_CAMEL,KB019…
RPL10A	GO:0003723; RNA binding; Molecular Function.GO:0006396; RNA processing; Biological Process	7	11	9	11	6	3	12	9	10	4	6	5	1	1	6	2	ENSRNOT00000045023_RATTU,yakA14197_GRUNN,ENSP00000363018-D6_GRUNN,ENSP00000382780-D2_GRUNN,goat_GLEAN_10013171_GOATS,ENSECAT00000014713_HORSE,Deer_GLEAN_10018308_DAVID,sheep_GLEAN_10009276_SHEEP,ENSSSCP00000022559_SWINE,ENSBTAP00000025963-D5_GRUNN,Muntiacus_muntjak_Rpl10a_10011807_MUNTJ,Deer_GLEAN_10019965_DAVID,Oryx_gazella_Rpl10a_10005064_GAZEL,Muntiacus_muntjak_Rpl10a_10021024_MUNTJ,ENSSSCP000…
LDHAL6B,LDHB,UEVLD,LDHA,LDHC,LDHAL6A	GO:0003824; catalytic activity; Molecular Function.GO:0005488; binding; Molecular Function.GO:0005975; carbohydrate metabolic process; Biological Process.GO:0006096; glycolysis; Biological Process.GO:0008152; metabolic process; Biological Process.GO:0016491; oxidoreductase activity; Molecular Function.GO:0016616; oxidoreductase activity, acting on the CH-OH group of donors, NAD or NADP as accepto…	8	4	4	10	6	4	6	5	5	8	7	6	4	6	12	4	PHO00011757_CHIRU,ENSRNOT00000017851_RATTU,ENSBTAP00000018040-D1_GRUNN,ENST00000396213_HUMAN,Oryx_gazella_LDHA_10012115_GAZEL,ENSSSCP00000014199_SWINE,ENSBTAT00000011447_BOVIN,ENSBTAT00000018040_BOVIN,ENSRNOT00000066847_RATTU,GOAT_ENSP00000379386_GOATS,KB017417.1_cdsid_EPY77748.1_CAMEL,KB017417.1_cdsid_EPY77747.1_CAMEL,PHO00002662_CHIRU,ENSRNOT00000038163_RATTU,ENSECAT00000010402_HORSE,ENSMUST000…
RPS20	GO:0003735; structural constituent of ribosome; Molecular Function.GO:0005622; intracellular; Cellular Component.GO:0005840; ribosome; Cellular Component.GO:0006412; translation; Biological Process	2	1	1	2	2	1	11	8	6	8	2	1	1	1	3	1	PHO00002879_CHIRU,Deer_GLEAN_10012648_DAVID,Deer_GLEAN_10007916_DAVID,BACU010830_WHALE,BACU014435_WHALE,BACU020492_WHALE,Deer_GLEAN_10023667_DAVID,Deer_GLEAN_10012897_DAVID,Deer_GLEAN_10007060_DAVID,Oryx_gazella_Rps20_10022492_GAZEL,Muntiacus_muntjak_Rps20_10009241_MUNTJ,Giraffe_Rps20_10004631_GIRAF,Giraffe_Rps20_10015398_GIRAF,PHO00011367_CHIRU,Deer_GLEAN_10018856_DAVID,Deer_GLEAN_10019601_DAVID…
RPL21	GO:0003735; structural constituent of ribosome; Molecular Function.GO:0005622; intracellular; Cellular Component.GO:0005840; ribosome; Cellular Component.GO:0006412; translation; Biological Process	8	10	11	9	16	7	14	7	3	8	1	3	8	1	51	19	ENSRNOT00000048115_RATTU,ENSBTAT00000019522_BOVIN,ENSECAT00000006694_HORSE,Muntiacus_muntjak_RPL21_10010565_MUNTJ,ENSMUST00000079153_MOUSE,ENSRNOT00000052088_RATTU,KB016875.1_cdsid_EPY83013.1_CAMEL,ENSBTAP00000051381-D25_GRUNN,ENSRNOT00000050067_RATTU,ENSBTAP00000052275-D7_GRUNN,SHEEP_ENSP00000370569_SHEEP,ENSRNOT00000056321_RATTU,ENSRNOT00000048719_RATTU,ENSRNOT00000049422_RATTU,Deer_GLEAN_10012…
NA	NA	42	8	9	0	19	0	0	0	0	0	0	0	0	0	0	0	PHO00010077_CHIRU,ENSBTAP00000050921-D50_GRUNN,ENSBTAP00000047226-D5_GRUNN,ENSBTAP00000052619-D23_GRUNN,PHO00021599_CHIRU,ENSBTAP00000050430-D81_GRUNN,PHO00021630_CHIRU,ENSBTAP00000048584-D28_GRUNN,ENSBTAP00000050273-D68_GRUNN,goat_GLEAN_10015786_GOATS,PHO00010084_CHIRU,ENSBTAP00000052257-D20_GRUNN,PHO00021608_CHIRU,ENSBTAP00000050721-D43_GRUNN,goat_GLEAN_10015790_GOATS,sheep_GLEAN_10017276_SHEEP…
NA	NA	0	0	1	0	1	0	0	0	0	0	1	0	0	0	0	0	goat_GLEAN_10014699_GOATS,yakG025883_GRUNN,ENSSSCP00000024578_SWINE
FTH1,FTL,FTMT,FTL1,FTH,FTHL17	GO:0005488; binding; Molecular Function.GO:0006826; iron ion transport; Biological Process.GO:0006879; cellular iron ion homeostasis; Biological Process.GO:0008199; ferric iron binding; Molecular Function.GO:0016491; oxidoreductase activity; Molecular Function.GO:0046914; transition metal ion binding; Molecular Function.GO:0055114; oxidation reduction; Biological Process.GO:0055114; oxidation-red…	28	27	30	23	31	16	27	28	26	25	12	37	11	3	25	10	PHO00002143_CHIRU,ENSECAT00000003107_HORSE,Giraffe_FTH1_10009368_GIRAF,BACU011776_WHALE,ENSBTAT00000057249_BOVIN,Deer_GLEAN_10005245_DAVID,KB017180.1_cdsid_EPY79267.1_CAMEL,goat_GLEAN_10012536_GOATS,goat_GLEAN_10012542_GOATS,Deer_GLEAN_10014708_DAVID,ENSBTAP00000018187-D34_GRUNN,Oryx_gazella_FTL_10018956_GAZEL,Oryx_gazella_FTH1_10000047_GAZEL,Deer_GLEAN_10021111_DAVID,ENSRNOT00000028315_RATTU,BAC…
HIPK2,HIPK1,HIPK3	GO:0004672; protein kinase activity; Molecular Function.GO:0004674; protein serine/threonine kinase activity; Molecular Function.GO:0005524; ATP binding; Molecular Function.GO:0006468; protein amino acid phosphorylation; Biological Process.GO:0006468; protein phosphorylation; Biological Process	1	0	0	2	1	0	0	3	2	1	1	3	0	0	0	0	Muntiacus_muntjak_HIPK1_10013643_MUNTJ,Muntiacus_muntjak_HIPK3_10001721_MUNTJ,Giraffe_Hipk2_10013655_GIRAF,KB019377.1_cdsid_EQB79163.1_CAMEL,KB018042.1_cdsid_EPY74518.1_CAMEL,ENSSSCP00000023629_SWINE,Oryx_gazella_Hipk2_10015080_GAZEL,KB017062.1_cdsid_EPY80687.1_CAMEL,BACU002688_WHALE,Oryx_gazella_HIPK1_10013105_GAZEL,ENSBTAP00000051852-D2_GRUNN,Giraffe_HIPK1_10010315_GIRAF,Muntiacus_muntjak_Hipk2…
RAN,RASL2-9	GO:0003924; GTPase activity; Molecular Function.GO:0005515; protein binding; Molecular Function.GO:0005525; GTP binding; Molecular Function.GO:0005622; intracellular; Cellular Component.GO:0006886; intracellular protein transport; Biological Process.GO:0006913; nucleocytoplasmic transport; Biological Process.GO:0007165; signal transduction; Biological Process.GO:0007264; small GTPase mediated sig…	8	6	6	10	10	2	18	9	6	6	1	2	1	1	3	3	Oryx_gazella_Ran_10022521_GAZEL,Oryx_gazella_Ran_10010673_GAZEL,Deer_GLEAN_10021843_DAVID,BACU019997_WHALE,Oryx_gazella_Ran_10006364_GAZEL,SHEEP_ENSBTAP00000040715_SHEEP,ENSMUST00000029955_MOUSE,Giraffe_Ran_10011000_GIRAF,BACU014596_WHALE,Oryx_gazella_Ran_10004630_GAZEL,Oryx_gazella_Ran_10015505_GAZEL,Oryx_gazella_ran_10005647_GAZEL,KB017776.1_cdsid_EPY75534.1_CAMEL,PHO00015227_CHIRU,Muntiacus_mu…
USP17L6,USP17L2,USP22,USP27X,USP17,RP11-1396O13.11,RP11-1286E23.12,RP11-1286E23.10,RP11-1396O13.9,RP11-1286E23.5,RP11-1286E23.17,RP11-1396O13.5,RP11-1286E23.16,AC116655.1,RP11-1286E23.13,RP11-1286E23.6,USP17L5,RP11-1396O13.4,RP11-1286E23.7,RP11-1286E23.14,RP11-1396O13.7,USP51,RP11-1286E23.8,RP11-1396O13.8,RP11-1286E23.15	GO:0004221; ubiquitin thiolesterase activity; Molecular Function.GO:0006511; ubiquitin-dependent protein catabolic process; Biological Process.GO:0008270; zinc ion binding; Molecular Function	2	2	2	3	4	2	2	17	9	2	3	4	4	22	6	8	ENSBTAP00000049108-D1_GRUNN,Giraffe_USP17L6_10000871_GIRAF,GOAT_ENSBTAP00000049108_GOATS,Muntiacus_muntjak_USP27X_10011557_MUNTJ,ENST00000504104_HUMAN,GOAT_ENSBTAP00000011818_GOATS,ENSMUST00000073394_MOUSE,ENSECAT00000006053_HORSE,ENSECAT00000023514_HORSE,ENSMUST00000095755_MOUSE,ENSBTAT00000056161_BOVIN,PHO00010493_CHIRU,ENST00000511568_HUMAN,Giraffe_USP17L6_10000742_GIRAF,Giraffe_USP17L6_100000…
NA	NA	0	1	0	0	1	0	0	0	0	0	0	0	0	0	0	0	ENSBTAP00000049912-D4_GRUNN,sheep_GLEAN_10005224_SHEEP
NA	NA	0	1	0	0	1	0	1	0	0	0	0	1	0	0	0	0	Deer_GLEAN_10009596_DAVID,KB017697.1_cdsid_EPY75945.1_CAMEL,yakG040942_GRUNN,SHEEP_ENSBTAP00000003759_SHEEP
NA	NA	1	0	1	0	2	0	1	0	2	1	0	1	0	1	0	0	PHO00001241_CHIRU,Giraffe_NAP1L1_10005515_GIRAF,ENSBTAP00000033675-D3_GRUNN,KB016469.1_cdsid_EPY88418.1_CAMEL,BACU010256_WHALE,Giraffe_NAP1L1_10021152_GIRAF,goat_GLEAN_10020211_GOATS,Deer_GLEAN_10014174_DAVID,ENST00000373518_HUMAN,ENSBTAP00000033675-D1_GRUNN
RPS24	GO:0003735; structural constituent of ribosome; Molecular Function.GO:0005622; intracellular; Cellular Component.GO:0005840; ribosome; Cellular Component.GO:0006412; translation; Biological Process	2	4	7	3	3	1	11	6	2	5	3	2	1	1	4	1	GOAT_ENSP00000394975_GOATS,Muntiacus_muntjak_rps24_10020493_MUNTJ,Deer_GLEAN_10015848_DAVID,Giraffe_rps24_10006249_GIRAF,Deer_GLEAN_10017322_DAVID,sheep_GLEAN_10002077_SHEEP,ENSSSCP00000024421_SWINE,ENSECAT00000017860_HORSE,yakA09785_GRUNN,Deer_GLEAN_10023018_DAVID,ENSMUST00000169826_MOUSE,sheep_GLEAN_10010996_SHEEP,ENSBTAT00000046662_BOVIN,Deer_GLEAN_10022763_DAVID,ENSRNOT00000064788_RATTU,BACU0…
NOP56	NA	1	1	2	4	4	1	8	5	12	3	0	1	0	0	0	0	Deer_GLEAN_10009287_DAVID,Giraffe_NOP56_10015754_GIRAF,Giraffe_NOP56_10015339_GIRAF,PHO00002675_CHIRU,BACU013672_WHALE,ENSP00000402050-D8_GRUNN,Giraffe_NOP56_10001227_GIRAF,Oryx_gazella_NOP56_10012548_GAZEL,sheep_GLEAN_10017533_SHEEP,Giraffe_NOP56_10002048_GIRAF,Giraffe_NOP56_10003557_GIRAF,Muntiacus_muntjak_NOP56_10023488_MUNTJ,Oryx_gazella_NOP56_10006243_GAZEL,ENSP00000402050-D12_GRUNN,Muntiacu…
RPL32	GO:0003735; structural constituent of ribosome; Molecular Function.GO:0005622; intracellular; Cellular Component.GO:0005840; ribosome; Cellular Component.GO:0006412; translation; Biological Process	3	3	4	6	4	1	5	2	2	3	5	31	2	1	11	4	KB017031.1_cdsid_EPY80996.1_CAMEL,ENSSSCP00000012346_SWINE,ENSMUST00000081840_MOUSE,goat_GLEAN_10018716_GOATS,KB016929.1_cdsid_EPY82365.1_CAMEL,Deer_GLEAN_10015633_DAVID,KB016973.1_cdsid_EQB78213.1_CAMEL,ENSBTAP00000033910-D8_GRUNN,PHO00004479_CHIRU,KB017970.1_cdsid_EPY74836.1_CAMEL,ENSRNOT00000036031_RATTU,KB017626.1_cdsid_EQB78895.1_CAMEL,ENSMUST00000071235_MOUSE,KB016744.1_cdsid_EPY84654.1_CAM…
DUX4L4,AC025287.1,DUXA	GO:0003700; transcription factor activity; Molecular Function.GO:0006355; regulation of transcription, DNA-dependent; Biological Process.GO:0043565; sequence-specific DNA binding; Molecular Function.NA	2	1	1	0	4	0	1	0	1	5	1	1	1	2	6	0	ENSRNOT00000050263_RATTU,ENSSSCP00000002917_SWINE,BACU004905_WHALE,Giraffe_DUX4L4_10000950_GIRAF,PHO00005196_CHIRU,ENSBTAP00000049813-D1_GRUNN,PHO00000166_CHIRU,ENSP00000383666-D2_GRUNN,goat_GLEAN_10004988_GOATS,ENST00000398113_HUMAN,Deer_GLEAN_10007119_DAVID,ENSRNOT00000068641_RATTU,ENSRNOT00000064654_RATTU,BACU001195_WHALE,ENSRNOT00000030050_RATTU,ENSECAT00000022419_HORSE,SHEEP_ENSBTAP000000498…
NA	NA	0	0	1	0	1	0	0	0	0	0	0	0	0	0	0	0	GOAT_ENSP00000401158_GOATS,ENSBTAP00000006046-D1_GRUNN
HOXD9,HOXB9,HOXA9,RP1-170O19.20,HOXA10	NA.GO:0003700; sequence-specific DNA binding transcription factor activity; Molecular Function.GO:0005515; protein binding; Molecular Function.GO:0005634; nucleus; Cellular Component.GO:0006350; transcription; Biological Process.GO:0006355; regulation of transcription, DNA-dependent; Biological Process.GO:0016563; transcription activator activity; Molecular Function.GO:0043565; sequence-specific …	2	7	6	1	1	0	4	1	0	2	2	2	2	3	0	1	ENSMUST00000121043_MOUSE,SHEEP_ENSP00000302836_SHEEP,SHEEP_ENSBTAP00000005652_SHEEP,ENSSSCP00000021788_SWINE,Muntiacus_muntjak_HOXB9_10003564_MUNTJ,GOAT_ENSBTAP00000050223_GOATS,GOAT_ENSBTAP00000051506-D2_GOATS,KB017489.1_cdsid_EPY77244.1_CAMEL,BACU006395_WHALE,SHEEP_ENSP00000283921_SHEEP,SHEEP_ENSBTAP00000050223_SHEEP,ENSECAT00000002868_HORSE,PHO00018867_CHIRU,Oryx_gazella_Hoxd9_10021355_GAZEL,G…
CBX1,CBX3,CBX5	GO:0000785; chromatin; Cellular Component.GO:0003682; chromatin binding; Molecular Function.GO:0005634; nucleus; Cellular Component.GO:0006333; chromatin assembly or disassembly; Biological Process	6	7	6	5	10	3	10	5	3	10	4	4	3	3	12	6	ENSSSCP00000017701_SWINE,KB017261.1_cdsid_EPY78653.1_CAMEL,GOAT_ENSBTAP00000051274_GOATS,ENSBTAP00000007283-D1_GRUNN,ENSP00000391494-D1_GRUNN,KB016878.1_cdsid_EPY82951.1_CAMEL,SHEEP_ENSP00000336687_SHEEP,SHEEP_ENSBTAP00000008198_SHEEP,Deer_GLEAN_10014342_DAVID,Oryx_gazella_Cbx1_10011770_GAZEL,Oryx_gazella_Cbx1_10014366_GAZEL,BACU003767_WHALE,PHO00016872_CHIRU,ENSMUST00000081138_MOUSE,ENSECAT00000…
DGAT2,MOGAT1,MOGAT2,MOGAT3,AWAT1,DGAT2L6,AWAT2,AC004876.1	GO:0016747; transferase activity, transferring acyl groups other than amino-acyl groups; Molecular Function	14	14	10	14	14	11	12	20	13	6	5	6	7	8	7	6	Muntiacus_muntjak_DGAT2_10000088_MUNTJ,Muntiacus_muntjak_MOGAT2_10012113_MUNTJ,ENST00000379421_HUMAN,goat_GLEAN_10008435_GOATS,Deer_GLEAN_10001170_DAVID,SHEEP_ENSBTAP00000026848_SHEEP,SHEEP_ENSBTAP00000049702_SHEEP,ENST00000333026_HUMAN,Muntiacus_muntjak_MOGAT3_10015063_MUNTJ,ENSRNOT00000022557_RATTU,ENSMUST00000033567_MOUSE,Giraffe_DGAT2_10017657_GIRAF,ENSBTAT00000065083_BOVIN,ENSECAT00000019515…
RPS29	GO:0003735; structural constituent of ribosome; Molecular Function.GO:0005622; intracellular; Cellular Component.GO:0005840; ribosome; Cellular Component.GO:0006412; translation; Biological Process.NA	3	4	3	2	8	1	6	0	1	4	6	1	1	1	5	2	ENSECAT00000012143_HORSE,Deer_GLEAN_10018509_DAVID,ENSRNOT00000050726_RATTU,ENSBTAP00000000514-D6_GRUNN,sheep_GLEAN_10020870_SHEEP,ENSBTAT00000014734_BOVIN,ENSBTAP00000014734-D9_GRUNN,BACU019335_WHALE,ENST00000396020_HUMAN,PHO00003981_CHIRU,Deer_GLEAN_10005500_DAVID,ENSSSCP00000026960_SWINE,ENSSSCP00000024392_SWINE,goat_GLEAN_10005649_GOATS,sheep_GLEAN_10014850_SHEEP,Deer_GLEAN_10018451_DAVID,Dee…
TUBA1B,TUBA1C,TUB2	GO:0005198; structural molecule activity; Molecular Function.GO:0005525; GTP binding; Molecular Function.GO:0005874; microtubule; Cellular Component.GO:0007017; microtubule-based process; Biological Process.GO:0007018; microtubule-based movement; Biological Process.GO:0043234; protein complex; Cellular Component.GO:0051258; protein polymerization; Biological Process.NA	1	6	5	2	2	1	0	0	1	1	0	5	0	0	0	0	KB017242.1_cdsid_EPY78793.1_CAMEL,Oryx_gazella_TUBA1C_10006249_GAZEL,KB017242.1_cdsid_EPY78791.1_CAMEL,Giraffe_TUBA1B_10003469_GIRAF,GOAT_ENSBTAP00000041397-D2_GOATS,goat_GLEAN_10021090_GOATS,KB019218.1_cdsid_EPY73087.1_CAMEL,Oryx_gazella_TUB2_10007693_GAZEL,PHO00012543_CHIRU,SHEEP_ENSBTAP00000038184-D3_SHEEP,ENSBTAT00000023588_BOVIN,KB017061.1_cdsid_EPY80771.1_CAMEL,sheep_GLEAN_10018666_SHEEP,go…
TUBA1B,TUBA1C	GO:0003924; GTPase activity; Molecular Function.GO:0005525; GTP binding; Molecular Function.GO:0005874; microtubule; Cellular Component.GO:0007017; microtubule-based process; Biological Process.GO:0043234; protein complex; Cellular Component.GO:0051258; protein polymerization; Biological Process.GO:0005198; structural molecule activity; Molecular Function.GO:0007018; microtubule-based movement; B…	2	0	2	4	1	0	1	0	1	3	0	6	0	0	0	0	BACU003754_WHALE,KB017242.1_cdsid_EPY78795.1_CAMEL,goat_GLEAN_10021091_GOATS,Oryx_gazella_NA_10002136_GAZEL,BACU007659_WHALE,Oryx_gazella_Tuba1b_10016322_GAZEL,PHO00002585_CHIRU,Deer_GLEAN_10009262_DAVID,KB017242.1_cdsid_EPY78792.1_CAMEL,KB016990.1_cdsid_EPY81639.1_CAMEL,Oryx_gazella_TUBA1C_10006248_GAZEL,Giraffe_Tuba1b_10000788_GIRAF,Oryx_gazella_NA_10022447_GAZEL,KB017242.1_cdsid_EPY78797.1_CAM…
AFG3L1,AFG3L2	NA.GO:0004222; metalloendopeptidase activity; Molecular Function.GO:0005524; ATP binding; Molecular Function.GO:0006508; proteolysis; Biological Process	4	2	5	9	1	0	0	0	0	0	0	0	1	0	0	0	sheep_GLEAN_10008998_SHEEP,PHO00000086_CHIRU,ENSECAT00000028922_HORSE,Oryx_gazella_Afg3l1_10000036_GAZEL,goat_GLEAN_10006380_GOATS,ENSBTAP00000046304-D9_GRUNN,Oryx_gazella_Afg3l2_10022318_GAZEL,Oryx_gazella_Afg3l1_10007752_GAZEL,PHO00000540_CHIRU,goat_GLEAN_10011419_GOATS,Oryx_gazella_Afg3l1_10008547_GAZEL,Oryx_gazella_Afg3l1_10006852_GAZEL,Oryx_gazella_Afg3l1_10014053_GAZEL,sheep_GLEAN_10014262_…
ANKRD26	NA	3	2	3	0	12	1	3	1	0	0	1	0	0	0	1	1	ENSSSCP00000027321_SWINE,ENSP00000328517-D1_GRUNN,GOAT_ENSBTAP00000051999_GOATS,ENSBTAP00000022052-D1_GRUNN,ENSBTAP00000016663-D18_GRUNN,SHEEP_ENSBTAP00000011190_SHEEP,SHEEP_ENSBTAP00000051480-D2_SHEEP,ENSBTAP00000051999-D1_GRUNN,ENSBTAP00000011190-D18_GRUNN,PHO00004641_CHIRU,Deer_GLEAN_10013501_DAVID,ENSRNOT00000030040_RATTU,ENSP00000397428-D3_GRUNN,goat_GLEAN_10007003_GOATS,PHO00009997_CHIRU,EN…
RPL10,ACTIA	GO:0003735; structural constituent of ribosome; Molecular Function.GO:0005622; intracellular; Cellular Component.GO:0005840; ribosome; Cellular Component.GO:0006412; translation; Biological Process.NA	1	0	3	0	1	0	1	1	1	3	0	1	1	0	0	0	BACU009565_WHALE,Giraffe_RPL10_10005986_GIRAF,goat_GLEAN_10017238_GOATS,Deer_GLEAN_10002644_DAVID,goat_GLEAN_10007953_GOATS,BACU003579_WHALE,Muntiacus_muntjak_ACTIA_10015807_MUNTJ,ENSP00000297369-D8_GRUNN,goat_GLEAN_10011983_GOATS,ENSECAT00000005998_HORSE,KB016959.1_cdsid_EPY81969.1_CAMEL,PHO00002450_CHIRU,BACU001311_WHALE
RPL10,RPL10L	GO:0003735; structural constituent of ribosome; Molecular Function.GO:0005622; intracellular; Cellular Component.GO:0005840; ribosome; Cellular Component.GO:0006412; translation; Biological Process.GO:0016021; integral to membrane; Cellular Component	7	17	12	9	8	5	32	18	19	9	1	10	2	2	4	3	GOAT_ENSBTAP00000000802_GOATS,KB017742.1_cdsid_EPY75684.1_CAMEL,Deer_GLEAN_10007223_DAVID,Giraffe_RPL10_10009957_GIRAF,Deer_GLEAN_10002698_DAVID,Deer_GLEAN_10003246_DAVID,KB017488.1_cdsid_EPY77248.1_CAMEL,Giraffe_RPL10_10004833_GIRAF,KB016675.1_cdsid_EQB77516.1_CAMEL,Oryx_gazella_RPL10_10005554_GAZEL,ENSBTAT00000063980_BOVIN,Giraffe_RPL10_10019836_GIRAF,yakG005112_GRUNN,Giraffe_RPL10_10012068_GIR…
ABCC4	GO:0005524; ATP binding; Molecular Function.GO:0016887; ATPase activity; Molecular Function.NA	1	1	0	2	12	0	1	0	1	1	6	0	0	0	2	1	BACU017468_WHALE,ENSBTAP00000031486-D11_GRUNN,PHO00003360_CHIRU,ENSSSCP00000010145_SWINE,ENSBTAP00000043397-D11_GRUNN,Oryx_gazella_ABCC4_10000333_GAZEL,ENSBTAP00000031486-D10_GRUNN,Oryx_gazella_ABCC4_10000413_GAZEL,ENSBTAP00000043397-D2_GRUNN,ENSBTAP00000031486-D18_GRUNN,ENSBTAP00000031485-D9_GRUNN,Deer_GLEAN_10002140_DAVID,ENSBTAP00000031486-D6_GRUNN,ENSSSCP00000027774_SWINE,ENSBTAP00000031486-D…
ABCC4	GO:0005524; ATP binding; Molecular Function.GO:0016887; ATPase activity; Molecular Function.GO:0005254; chloride channel activity; Molecular Function.GO:0006810; transport; Biological Process.GO:0006811; ion transport; Biological Process.GO:0016020; membrane; Cellular Component.GO:0016021; integral to membrane; Cellular Component.GO:0042626; ATPase activity, coupled to transmembrane movement of s…	1	1	0	7	4	1	6	1	1	0	7	0	0	0	1	0	Oryx_gazella_ABCC4_10000482_GAZEL,ENSBTAP00000047385-D4_GRUNN,ENSSSCP00000010142_SWINE,ENSSSCP00000026380_SWINE,ENSBTAT00000063250_BOVIN,ENSSSCP00000027229_SWINE,Oryx_gazella_ABCC4_10000430_GAZEL,sheep_GLEAN_10008631_SHEEP,ENSSSCP00000024186_SWINE,Oryx_gazella_ABCC4_10000548_GAZEL,ENSSSCP00000010140_SWINE,Deer_GLEAN_10007010_DAVID,ENSRNOT00000064986_RATTU,ENSSSCP00000020216_SWINE,Deer_GLEAN_10001…
PCDHGA3,PCDHA10,PCDHGC4,PCDHGA8,PCDHA7,PCDHGA10,PCDHA3,PCDHGC5,PCDHA6,PCDHGA1	GO:0005509; calcium ion binding; Molecular Function.GO:0007156; homophilic cell adhesion; Biological Process.GO:0016020; membrane; Cellular Component	0	1	1	3	1	0	5	3	5	3	0	5	0	0	0	0	Deer_GLEAN_10011700_DAVID,GOAT_ENSBTAP00000051403_GOATS,Muntiacus_muntjak_PCDHA6_10000891_MUNTJ,ENSBTAP00000051403-D14_GRUNN,KB017005.1_cdsid_EPY81396.1_CAMEL,Deer_GLEAN_10011704_DAVID,Giraffe_PCDHGA3_10008280_GIRAF,BACU015970_WHALE,KB016371.1_cdsid_EPY89873.1_CAMEL,sheep_GLEAN_10007939_SHEEP,KB016371.1_cdsid_EPY89874.1_CAMEL,Deer_GLEAN_10011684_DAVID,Oryx_gazella_PCDHGA10_10007383_GAZEL,Muntiacu…
NA	NA	0	0	1	0	1	0	0	0	0	0	0	0	0	0	0	0	goat_GLEAN_10016062_GOATS,ENSBTAP00000049713-D4_GRUNN
CYP2B9,AC008537.1,AC008537.2	NA.GO:0004497; monooxygenase activity; Molecular Function.GO:0005506; iron ion binding; Molecular Function.GO:0009055; electron carrier activity; Molecular Function.GO:0020037; heme binding; Molecular Function.GO:0055114; oxidation-reduction process; Biological Process	2	1	6	1	4	0	2	0	0	0	2	0	0	2	3	0	ENSBTAP00000007005-D9_GRUNN,ENSSSCP00000011179_SWINE,ENST00000252909_HUMAN,ENSRNOT00000066875_RATTU,ENSBTAP00000007005-D7_GRUNN,ENSBTAP00000007005-D1_GRUNN,GOAT_ENSBTAP00000007005-D2_GOATS,ENSRNOT00000040325_RATTU,PHO00021303_CHIRU,GOAT_ENSP00000388274-D6_GOATS,Deer_GLEAN_10010331_DAVID,Deer_GLEAN_10015143_DAVID,Oryx_gazella_Cyp2b9_10008504_GAZEL,goat_GLEAN_10001449_GOATS,ENST00000412510_HUMAN,EN…
NA	NA	0	1	0	0	1	0	1	0	0	0	0	0	0	0	0	1	Deer_GLEAN_10004593_DAVID,sheep_GLEAN_10011551_SHEEP,ENSP00000388274-D15_GRUNN,ENSMUST00000132513_MOUSE
EEF1B,EEF1B2	GO:0003746; translation elongation factor activity; Molecular Function.GO:0005853; eukaryotic translation elongation factor 1 complex; Cellular Component.GO:0006414; translational elongation; Biological Process	4	5	5	4	3	1	6	6	2	2	1	3	1	1	3	1	Deer_GLEAN_10023058_DAVID,Giraffe_EEF1B_10010621_GIRAF,Muntiacus_muntjak_EEF1B_10005279_MUNTJ,BACU014159_WHALE,Giraffe_EEF1B_10018589_GIRAF,Oryx_gazella_EEF1B_10020863_GAZEL,GOAT_ENSBTAP00000043761_GOATS,KB016846.1_cdsid_EPY83430.1_CAMEL,ENSECAT00000017481_HORSE,PHO00018051_CHIRU,Deer_GLEAN_10010290_DAVID,ENSRNOT00000048735_RATTU,Muntiacus_muntjak_eef1b_10000592_MUNTJ,ENSRNOT00000034740_RATTU,SHE…
ORF11,C14ORF1	GO:0016021; integral to membrane; Cellular Component	4	2	3	2	4	1	3	1	1	1	0	1	1	1	1	1	KB017008.1_cdsid_EPY81344.1_CAMEL,ENSP00000256319-D2_GRUNN,ENSMUST00000021676_MOUSE,Oryx_gazella_ORF11_10021296_GAZEL,PHO00016758_CHIRU,GOAT_ENSP00000256319_GOATS,ENSECAT00000021681_HORSE,PHO00002448_CHIRU,PHO00016764_CHIRU,yakG028895_GRUNN,PHO00016757_CHIRU,ENSRNOT00000012327_RATTU,Deer_GLEAN_10000516_DAVID,ENSBTAP00000015904-D1_GRUNN,Deer_GLEAN_10000517_DAVID,Giraffe_ORF11_10014874_GIRAF,yakA18…
RPSA,RPL13A,RPSAP58	GO:0003735; structural constituent of ribosome; Molecular Function.GO:0005622; intracellular; Cellular Component.GO:0005840; ribosome; Cellular Component.GO:0006412; translation; Biological Process.GO:0015935; small ribosomal subunit; Cellular Component	6	5	5	2	4	1	5	11	7	5	7	14	6	2	8	2	ENSECAT00000010871_HORSE,goat_GLEAN_10019885_GOATS,ENSRNOT00000035857_RATTU,sheep_GLEAN_10015595_SHEEP,ENSP00000389075-D8_GRUNN,KB017502.1_cdsid_EPY77181.1_CAMEL,Giraffe_RPSA_10002496_GIRAF,Muntiacus_muntjak_RPSA_10012866_MUNTJ,ENST00000301821_HUMAN,KB017614.1_cdsid_EPY76438.1_CAMEL,Muntiacus_muntjak_RPSA_10015961_MUNTJ,Muntiacus_muntjak_RPSA_10011552_MUNTJ,Giraffe_RPSA_10000625_GIRAF,ENSSSCP0000…
RPSA	GO:0003735; structural constituent of ribosome; Molecular Function.GO:0005622; intracellular; Cellular Component.GO:0005840; ribosome; Cellular Component.GO:0006412; translation; Biological Process.GO:0015935; small ribosomal subunit; Cellular Component.NA	0	2	1	0	4	0	0	0	3	0	0	3	0	0	0	0	yakA02196_GRUNN,Giraffe_Rpsa_10000872_GIRAF,yakG033701_GRUNN,goat_GLEAN_10004394_GOATS,sheep_GLEAN_10014150_SHEEP,Giraffe_RPSA_10000497_GIRAF,sheep_GLEAN_10015387_SHEEP,KB016777.1_cdsid_EPY84157.1_CAMEL,yakG001881_GRUNN,KB017696.1_cdsid_EPY75967.1_CAMEL,KB016818.1_cdsid_EPY83697.1_CAMEL,ENSP00000346598-D33_GRUNN,Giraffe_RPSA_10021454_GIRAF
SYT6,SYT14,SYT1	NA.GO:0005215; transporter activity; Molecular Function.GO:0005515; protein binding; Molecular Function.GO:0006810; transport; Biological Process.GO:0008021; synaptic vesicle; Cellular Component.GO:0016020; membrane; Cellular Component	1	1	2	1	2	0	0	2	0	1	0	2	0	0	0	0	PHO00000824_CHIRU,BACU012920_WHALE,Muntiacus_muntjak_SYT14_10004983_MUNTJ,sheep_GLEAN_10009156_SHEEP,ENSBTAP00000015657-D11_GRUNN,KB016793.1_cdsid_EPY84020.1_CAMEL,ENSP00000382548-D1_GRUNN,goat_GLEAN_10015726_GOATS,goat_GLEAN_10007089_GOATS,Oryx_gazella_Syt6_10012968_GAZEL,KB016683.1_cdsid_EPY85161.1_CAMEL,Muntiacus_muntjak_SYT1_10008424_MUNTJ
EMR2	NA.GO:0004930; G-protein coupled receptor activity; Molecular Function.GO:0007186; G-protein coupled receptor protein signaling pathway; Biological Process.GO:0016020; membrane; Cellular Component	0	0	1	0	1	0	0	1	0	0	1	0	0	0	0	0	ENSSSCP00000023503_SWINE,ENSP00000406506-D2_GRUNN,Muntiacus_muntjak_EMR2_10000419_MUNTJ,goat_GLEAN_10003598_GOATS
MAGEB10	NA	0	0	0	0	8	0	2	1	0	0	0	0	0	1	0	0	ENSP00000390237-D16_GRUNN,ENSP00000384982-D24_GRUNN,ENSP00000390237-D15_GRUNN,ENSP00000384982-D27_GRUNN,ENSP00000384982-D14_GRUNN,ENSP00000390237-D23_GRUNN,ENST00000391328_HUMAN,Muntiacus_muntjak_MAGEB10_10000624_MUNTJ,ENSP00000390237-D37_GRUNN,ENSP00000384982-D20_GRUNN,Deer_GLEAN_10000243_DAVID,Deer_GLEAN_10000107_DAVID
NA	NA	0	1	0	0	1	0	0	0	0	0	0	0	0	0	0	0	SHEEP_ENSP00000282326-D20_SHEEP,ENSP00000383222-D57_GRUNN
NA	NA	0	0	0	0	1	0	0	0	0	0	0	0	0	0	1	14	ENSMUST00000109062_MOUSE,ENSMUST00000099260_MOUSE,ENSMUST00000109018_MOUSE,ENSP00000402874-D45_GRUNN,ENSMUST00000076281_MOUSE,ENSMUST00000108997_MOUSE,ENSMUST00000072427_MOUSE,ENSMUST00000078257_MOUSE,ENSMUST00000109027_MOUSE,ENSMUST00000109048_MOUSE,ENSMUST00000109032_MOUSE,ENSMUST00000105316_MOUSE,ENSMUST00000095282_MOUSE,ENSMUST00000071374_MOUSE,ENSRNOT00000051889_RATTU,ENSMUST00000072014_MOUSE
NA	NA	0	0	1	0	1	0	0	0	0	0	0	1	0	0	0	0	goat_GLEAN_10010206_GOATS,KB017523.1_cdsid_EPY77073.1_CAMEL,yakA22442_GRUNN
SLC7A3,ZNF331,SLC7A1,SLC7A2,SLC7A4,SLC7A14	GO:0006810; transport; Biological Process.GO:0006865; amino acid transport; Biological Process.GO:0015171; amino acid transmembrane transporter activity; Molecular Function.GO:0016020; membrane; Cellular Component.GO:0055085; transmembrane transport; Biological Process.GO:0003676; nucleic acid binding; Molecular Function.GO:0005622; intracellular; Cellular Component.GO:0006355; regulation of tran…	13	19	17	23	27	18	16	23	14	6	11	9	18	5	5	6	ENSP00000370128-D1_GRUNN,sheep_GLEAN_10005705_SHEEP,Oryx_gazella_SLC7A3_10000718_GAZEL,SHEEP_ENSBTAP00000031960_SHEEP,Muntiacus_muntjak_SLC7A3_10004000_MUNTJ,ENSBTAT00000020051_BOVIN,Giraffe_SLC7A3_10006297_GIRAF,ENSBTAP00000019910-D25_GRUNN,Giraffe_SLC7A3_10003871_GIRAF,SHEEP_ENSBTAP00000019910_SHEEP,ENSBTAP00000023823-D2_GRUNN,SHEEP_ENSBTAP00000012050_SHEEP,Oryx_gazella_SLC7A3_10000765_GAZEL,KB…
FOXD1,FOXB2,FOXI2,FOXQ1	GO:0003700; transcription factor activity; Molecular Function.GO:0005634; nucleus; Cellular Component.GO:0006355; regulation of transcription, DNA-dependent; Biological Process.GO:0043565; sequence-specific DNA binding; Molecular Function.GO:0003700; sequence-specific DNA binding transcription factor activity; Molecular Function	2	7	5	2	1	0	0	2	2	1	0	3	1	0	2	0	Muntiacus_muntjak_FOXQ1_10012604_MUNTJ,KB016722.1_cdsid_EPY84874.1_CAMEL,goat_GLEAN_10019529_GOATS,SHEEP_ENSP00000326371_SHEEP,GOAT_ENSP00000365898_GOATS,KB017342.1_cdsid_EPY78099.1_CAMEL,Oryx_gazella_FOXI2_10023527_GAZEL,SHEEP_ENSP00000371940_SHEEP,Oryx_gazella_Foxb2_10021145_GAZEL,ENSRNOT00000066752_RATTU,KB017115.1_cdsid_EPY80092.1_CAMEL,ENSBTAP00000050460-D3_GRUNN,SHEEP_ENSBTAP00000011206_SHE…
RPL19	GO:0003735; structural constituent of ribosome; Molecular Function.GO:0005622; intracellular; Cellular Component.GO:0005840; ribosome; Cellular Component.GO:0006412; translation; Biological Process	4	4	7	10	3	1	5	2	7	2	2	3	2	1	8	1	ENSSSCP00000018556_SWINE,PHO00002539_CHIRU,BACU013776_WHALE,KB019097.1_cdsid_EPY73162.1_CAMEL,goat_GLEAN_10012351_GOATS,Oryx_gazella_Rpl19_10018528_GAZEL,ENSRNOT00000051215_RATTU,ENSMUST00000017548_MOUSE,ENSECAT00000003423_HORSE,ENSRNOT00000006359_RATTU,BACU007004_WHALE,goat_GLEAN_10020750_GOATS,Giraffe_Rpl19_10016975_GIRAF,ENSRNOT00000007683_RATTU,Giraffe_Rpl19_10012678_GIRAF,ENSRNOT00000022805_…
ADAM30,ADAM21,ADAM20	GO:0004222; metalloendopeptidase activity; Molecular Function.GO:0005488; binding; Molecular Function.GO:0006508; proteolysis; Biological Process.GO:0008270; zinc ion binding; Molecular Function.NA	0	0	0	0	3	0	1	1	3	1	0	7	0	0	0	0	KB017461.1_cdsid_EPY77506.1_CAMEL,Muntiacus_muntjak_ADAM20_10000769_MUNTJ,Giraffe_ADAM30_10013182_GIRAF,KB017461.1_cdsid_EPY77500.1_CAMEL,Deer_GLEAN_10001378_DAVID,KB017142.1_cdsid_EPY79726.1_CAMEL,ENSBTAP00000001670-D4_GRUNN,KB016724.1_cdsid_EPY84846.1_CAMEL,BACU010777_WHALE,KB017101.1_cdsid_EPY80200.1_CAMEL,Giraffe_ADAM21_10016869_GIRAF,ENSP00000402081-D3_GRUNN,ENSP00000402081-D1_GRUNN,KB017142…
RPL7,RPL7L1	GO:0003735; structural constituent of ribosome; Molecular Function.GO:0005622; intracellular; Cellular Component.GO:0005840; ribosome; Cellular Component.GO:0006412; translation; Biological Process.GO:0007186; G-protein coupled receptor protein signaling pathway; Biological Process.GO:0016021; integral to membrane; Cellular Component.GO:0004672; protein kinase activity; Molecular Function.GO:0004…	15	15	15	12	12	5	20	15	14	7	3	2	3	2	16	5	goat_GLEAN_10006333_GOATS,Oryx_gazella_RPL7_10008706_GAZEL,Giraffe_RPL7_10003357_GIRAF,Oryx_gazella_RPL7_10008791_GAZEL,Muntiacus_muntjak_RPL7_10005439_MUNTJ,Deer_GLEAN_10008170_DAVID,goat_GLEAN_10020517_GOATS,Muntiacus_muntjak_RPL7L1_10021480_MUNTJ,goat_GLEAN_10003610_GOATS,BACU009775_WHALE,Deer_GLEAN_10007789_DAVID,Oryx_gazella_RPL7_10008127_GAZEL,ENSRNOT00000021803_RATTU,ENSMUST00000027054_MOU…
RBM12B	NA	0	0	0	0	12	0	0	1	0	1	0	0	0	0	4	0	ENSP00000392292-D52_GRUNN,BACU014703_WHALE,ENSP00000406167-D8_GRUNN,ENSP00000389924-D19_GRUNN,ENSP00000389924-D8_GRUNN,ENSBTAP00000030000-D3_GRUNN,ENSP00000389924-D18_GRUNN,ENSP00000380631-D36_GRUNN,ENSP00000376630-D9_GRUNN,ENSP00000389924-D39_GRUNN,ENSP00000389924-D36_GRUNN,Muntiacus_muntjak_RBM12B_10023764_MUNTJ,ENSRNOT00000060862_RATTU,ENSP00000389924-D20_GRUNN,ENSRNOT00000061184_RATTU,ENSRNOT…
PRX	NA	1	1	0	0	3	0	0	1	0	0	0	0	0	0	0	0	SHEEP_ENSBTAP00000046970_SHEEP,PHO00020681_CHIRU,ENSP00000389924-D77_GRUNN,yakG031731_GRUNN,Muntiacus_muntjak_Prx_10000678_MUNTJ,ENSBTAP00000036767-D17_GRUNN
AC091435.2,AC091435.1	NA	0	0	0	0	5	0	0	0	0	0	0	0	0	2	2	0	ENSP00000371197-D11_GRUNN,ENSRNOT00000052163_RATTU,ENSP00000380580-D4_GRUNN,ENSP00000398574-D41_GRUNN,ENST00000431698_HUMAN,ENSP00000415308-D12_GRUNN,ENSRNOT00000059229_RATTU,ENST00000381778_HUMAN,ENSP00000416250-D53_GRUNN
NA	NA	0	0	0	0	2	0	0	0	0	0	0	0	0	0	6	0	ENSP00000406167-D5_GRUNN,ENSP00000409039-D25_GRUNN,ENSRNOT00000047758_RATTU,ENSRNOT00000061261_RATTU,ENSRNOT00000051172_RATTU,ENSRNOT00000056591_RATTU,ENSRNOT00000055731_RATTU,ENSRNOT00000056901_RATTU
NA	NA	1	0	0	0	2	0	0	0	0	0	0	0	0	0	0	0	PHO00015232_CHIRU,ENSP00000403284-D73_GRUNN,ENSP00000393240-D58_GRUNN
NA	NA	0	0	0	0	3	0	0	0	0	0	0	0	0	0	1	0	ENSP00000413491-D33_GRUNN,ENSP00000409870-D14_GRUNN,ENSP00000388798-D8_GRUNN,ENSRNOT00000062072_RATTU
RPLP0	GO:0003735; structural constituent of ribosome; Molecular Function.GO:0005622; intracellular; Cellular Component.GO:0005840; ribosome; Cellular Component.GO:0006414; translational elongation; Biological Process.GO:0042254; ribosome biogenesis; Biological Process	2	2	2	5	2	1	3	2	1	3	0	5	2	1	7	2	ENSRNOT00000001518_RATTU,ENSRNOT00000037986_RATTU,Deer_GLEAN_10017329_DAVID,Oryx_gazella_RPLP0_10003006_GAZEL,BACU017970_WHALE,BACU003459_WHALE,Deer_GLEAN_10011820_DAVID,ENSMUST00000076373_MOUSE,Muntiacus_muntjak_RPLP0_10019959_MUNTJ,KB018628.1_cdsid_EPY73520.1_CAMEL,GOAT_ENSBTAP00000048183_GOATS,Oryx_gazella_RPLP0_10003623_GAZEL,ENSBTAT00000055086_BOVIN,ENSRNOT00000021848_RATTU,ENSECAT0000001653…
NA	NA	0	1	0	0	1	0	0	0	0	0	0	1	0	0	0	0	sheep_GLEAN_10004505_SHEEP,ENSP00000388427-D4_GRUNN,KB016669.1_cdsid_EPY85441.1_CAMEL
NA	NA	0	0	0	0	3	0	0	0	1	0	0	0	0	0	0	0	yakA17479_GRUNN,ENSP00000401786-D9_GRUNN,Giraffe_NA_10011337_GIRAF,ENSP00000401786-D2_GRUNN
KRTAP13-1,KRTAP14,KRTAP13-2,KRTAP13-3,KRTAP13-4,KRTAP15-1	NA	6	7	6	4	8	2	7	2	1	3	0	9	1	5	7	6	KB018601.1_cdsid_EPY73556.1_CAMEL,KB018601.1_cdsid_EPY73553.1_CAMEL,GOAT_ENSBTAP00000004707-D8_GOATS,SHEEP_ENSBTAP00000004707-D2_SHEEP,SHEEP_ENSBTAP00000004707-D5_SHEEP,ENSMUST00000009191_MOUSE,Deer_GLEAN_10010045_DAVID,ENSBTAT00000053288_BOVIN,ENSBTAP00000052751-D5_GRUNN,ENSBTAP00000004707-D5_GRUNN,ENST00000399889_HUMAN,ENSRNOT00000061620_RATTU,Giraffe_KRTAP13-1_10012029_GIRAF,Deer_GLEAN_1000466…
RPL17	GO:0003735; structural constituent of ribosome; Molecular Function.GO:0005622; intracellular; Cellular Component.GO:0005840; ribosome; Cellular Component.GO:0006412; translation; Biological Process.GO:0015934; large ribosomal subunit; Cellular Component	7	25	19	10	20	10	35	24	11	14	1	6	1	1	11	8	ENSRNOT00000049695_RATTU,BACU000772_WHALE,ENSBTAT00000042617_BOVIN,Oryx_gazella_Rpl17_10017143_GAZEL,sheep_GLEAN_10013712_SHEEP,Muntiacus_muntjak_RPL17_10012205_MUNTJ,sheep_GLEAN_10001559_SHEEP,ENSBTAP00000051262-D9_GRUNN,Deer_GLEAN_10010956_DAVID,BACU007029_WHALE,Deer_GLEAN_10021825_DAVID,BACU017657_WHALE,BACU016838_WHALE,Muntiacus_muntjak_Rpl17_10014205_MUNTJ,Deer_GLEAN_10019228_DAVID,sheep_GLE…
RPL17	NA.GO:0003735; structural constituent of ribosome; Molecular Function.GO:0006412; translation; Biological Process.GO:0015934; large ribosomal subunit; Cellular Component	0	1	2	0	1	0	4	1	0	0	0	0	0	0	0	0	Deer_GLEAN_10021706_DAVID,goat_GLEAN_10008805_GOATS,yakG004357_GRUNN,Muntiacus_muntjak_Rpl17_10004981_MUNTJ,Deer_GLEAN_10004227_DAVID,goat_GLEAN_10002239_GOATS,sheep_GLEAN_10006013_SHEEP,Deer_GLEAN_10018881_DAVID,Deer_GLEAN_10021662_DAVID
NA	NA	1	0	0	0	2	0	0	0	0	0	0	0	0	0	0	0	yakG021498_GRUNN,ENSP00000403083-D1_GRUNN,PHO00001254_CHIRU
NRXN3,NRXN1	NA	2	1	0	2	1	0	2	0	1	3	2	2	1	0	0	0	ENSECAT00000005737_HORSE,Deer_GLEAN_10008404_DAVID,BACU013878_WHALE,Oryx_gazella_NA_10000773_GAZEL,KB017094.1_cdsid_EPY80336.1_CAMEL,Oryx_gazella_NRXN1_10009181_GAZEL,ENSSSCP00000020877_SWINE,PHO00001931_CHIRU,PHO00002946_CHIRU,KB017001.1_cdsid_EPY81473.1_CAMEL,Deer_GLEAN_10021896_DAVID,Giraffe_NRXN3_10015029_GIRAF,sheep_GLEAN_10004466_SHEEP,BACU005325_WHALE,yakG025773_GRUNN,ENSSSCP00000020441_SW…
EPHB1,EPHA2,EPHA3,EPHA6,EPHB2,EPHA4	GO:0005003; ephrin receptor activity; Molecular Function.GO:0005524; ATP binding; Molecular Function.GO:0016020; membrane; Cellular Component.GO:0005515; protein binding; Molecular Function	1	3	3	5	1	0	5	3	1	4	3	5	1	0	0	1	goat_GLEAN_10017009_GOATS,sheep_GLEAN_10021135_SHEEP,Oryx_gazella_EPHA2_10004756_GAZEL,sheep_GLEAN_10014965_SHEEP,SHEEP_ENSBTAP00000050878_SHEEP,ENSMUST00000108194_MOUSE,ENSSSCP00000012556_SWINE,Muntiacus_muntjak_EPHA6_10007526_MUNTJ,KB017500.1_cdsid_EPY77196.1_CAMEL,KB016923.1_cdsid_EPY82429.1_CAMEL,BACU015714_WHALE,Deer_GLEAN_10021450_DAVID,ENSECAT00000014402_HORSE,BACU000018_WHALE,PHO00002799_…
PTPRM,PTPRT,PTPRK	GO:0016020; membrane; Cellular Component.GO:0005515; protein binding; Molecular Function	1	0	1	3	1	0	4	3	2	2	2	4	0	0	1	0	GOAT_ENSBTAP00000053791-D2_GOATS,Oryx_gazella_PTPRT_10023081_GAZEL,KB017603.1_cdsid_EPY76506.1_CAMEL,Deer_GLEAN_10012245_DAVID,PHO00019989_CHIRU,BACU014289_WHALE,ENSBTAP00000053791-D1_GRUNN,Oryx_gazella_PTPRM_10021782_GAZEL,Giraffe_PTPRM_10010715_GIRAF,KB017174.1_cdsid_EPY79319.1_CAMEL,KB017174.1_cdsid_EPY79318.1_CAMEL,ENSSSCP00000024330_SWINE,Oryx_gazella_PTPRK_10017647_GAZEL,ENSSSCP00000021829_…
FRMD3	NA	0	0	1	0	1	0	0	1	0	1	0	0	0	0	0	0	BACU006682_WHALE,Muntiacus_muntjak_FRMD3_10015910_MUNTJ,GOAT_ENSBTAP00000048353-D2_GOATS,ENSBTAP00000048353-D2_GRUNN
ANO4	NA	0	1	0	0	1	0	0	1	0	0	0	1	0	1	0	0	yakG036747_GRUNN,sheep_GLEAN_10016690_SHEEP,ENST00000538618_HUMAN,Muntiacus_muntjak_ANO4_10007483_MUNTJ,KB018134.1_cdsid_EPY74350.1_CAMEL
BMP8B	GO:0008083; growth factor activity; Molecular Function.GO:0040007; growth; Biological Process.NA	1	3	1	2	2	0	0	0	1	3	0	2	2	0	0	0	PHO00017497_CHIRU,BACU001602_WHALE,sheep_GLEAN_10021714_SHEEP,KB017291.1_cdsid_EPY78476.1_CAMEL,ENSBTAP00000005807-D3_GRUNN,KB016713.1_cdsid_EPY84942.1_CAMEL,Giraffe_BMP8B_10012690_GIRAF,Oryx_gazella_BMP8B_10006164_GAZEL,BACU000505_WHALE,SHEEP_ENSBTAP00000052102-D2_SHEEP,sheep_GLEAN_10021708_SHEEP,Oryx_gazella_BMP8B_10006157_GAZEL,BACU017629_WHALE,ENSECAT00000008616_HORSE,ENSECAT00000028827_HORSE…
RPS8	GO:0000045; autophagic vacuole formation; Biological Process.GO:0005622; intracellular; Cellular Component.GO:0005737; cytoplasm; Cellular Component.NA	2	1	3	2	2	1	3	6	3	2	1	5	1	1	6	4	ENSECAT00000015894_HORSE,ENSRNOT00000009490_RATTU,PHO00002030_CHIRU,KB016655.1_cdsid_EQB77469.1_CAMEL,ENSMUST00000085711_MOUSE,ENSSSCP00000004246_SWINE,ENSP00000379888-D1_GRUNN,ENSRNOT00000017175_RATTU,goat_GLEAN_10002538_GOATS,ENSMUST00000102696_MOUSE,SHEEP_ENSP00000379888_SHEEP,Giraffe_Rps8_10013690_GIRAF,ENSMUST00000172445_MOUSE,Muntiacus_muntjak_Rps8_10005737_MUNTJ,Oryx_gazella_Rps8_10010863_…
RPS6	GO:0003735; structural constituent of ribosome; Molecular Function.GO:0005622; intracellular; Cellular Component.GO:0005840; ribosome; Cellular Component.GO:0006412; translation; Biological Process	14	6	12	11	10	5	16	10	4	4	4	3	1	1	6	3	Oryx_gazella_Rps6_10020873_GAZEL,ENSBTAP00000050324-D16_GRUNN,ENSBTAT00000024234_BOVIN,Muntiacus_muntjak_Rps6_10023968_MUNTJ,sheep_GLEAN_10015342_SHEEP,goat_GLEAN_10019528_GOATS,Deer_GLEAN_10019685_DAVID,BACU006605_WHALE,ENSMUST00000102814_MOUSE,goat_GLEAN_10009760_GOATS,KB016762.1_cdsid_EPY84384.1_CAMEL,sheep_GLEAN_10009331_SHEEP,KB017331.1_cdsid_EQB78775.1_CAMEL,Muntiacus_muntjak_Rps6_10011972_…
SYNE1,SYNE2	NA.GO:0005515; protein binding; Molecular Function	1	3	1	0	2	0	3	1	1	0	0	1	1	0	2	0	Muntiacus_muntjak_SYNE2_10002102_MUNTJ,ENSECAT00000014248_HORSE,ENSRNOT00000068447_RATTU,SHEEP_ENSBTAP00000010863_SHEEP,Deer_GLEAN_10011663_DAVID,SHEEP_ENSBTAP00000012582_SHEEP,ENSBTAP00000012582-D1_GRUNN,sheep_GLEAN_10003231_SHEEP,GOAT_ENSBTAP00000012582_GOATS,Deer_GLEAN_10009211_DAVID,ENSRNOT00000039145_RATTU,ENSBTAP00000010863-D1_GRUNN,Giraffe_SYNE1_10008674_GIRAF,KB019124.1_cdsid_EPY73137.1_C…
NA	NA	2	0	2	0	1	0	0	0	0	0	0	1	0	0	0	0	goat_GLEAN_10008382_GOATS,yakG032084_GRUNN,PHO00001649_CHIRU,goat_GLEAN_10005461_GOATS,PHO00002531_CHIRU,KB016517.1_cdsid_EPY87713.1_CAMEL
NA	NA	0	0	1	0	1	0	0	0	0	0	0	1	0	0	0	0	ENSBTAP00000041566-D1_GRUNN,KB017631.1_cdsid_EPY76253.1_CAMEL,GOAT_ENSBTAP00000017485_GOATS
NA	NA	0	7	0	0	1	0	0	0	0	0	0	0	0	0	0	0	sheep_GLEAN_10020042_SHEEP,sheep_GLEAN_10016192_SHEEP,ENSBTAP00000038565-D6_GRUNN,sheep_GLEAN_10015248_SHEEP,sheep_GLEAN_10015569_SHEEP,sheep_GLEAN_10019112_SHEEP,sheep_GLEAN_10018163_SHEEP,sheep_GLEAN_10021809_SHEEP
NA	NA	0	6	2	0	64	0	0	0	0	0	0	0	0	0	0	0	ENSBTAP00000035721-D55_GRUNN,ENSBTAP00000035721-D63_GRUNN,ENSBTAP00000035721-D64_GRUNN,ENSBTAP00000035721-D75_GRUNN,ENSBTAP00000035721-D17_GRUNN,ENSBTAP00000035721-D36_GRUNN,ENSBTAP00000035721-D72_GRUNN,ENSBTAP00000035721-D28_GRUNN,ENSBTAP00000035721-D23_GRUNN,ENSBTAP00000035721-D83_GRUNN,ENSBTAP00000035721-D53_GRUNN,ENSBTAP00000035721-D88_GRUNN,sheep_GLEAN_10011354_SHEEP,ENSBTAP00000035721-D34_G…
GM10881,IGKV1-5,IGKV2D-24,IGKV2-40,IGKV1-6,IGKV3-15,IGKV2-24,IGKV2-28,IGKV1-8,AC233263.1,IGKV3D-15,IGKV1-37,IGKV1D-33,IGKV1D-42,IGKV3-20,IGKV3-11,IGKV1-27,IGKV6-21,IGKV3D-20,IGKV1-12,IGKV2D-29,IGKV1-17,IGKV1D-8,IGKV1D-16,IGKV2-30,IGKV1D-13,IGKV2D-26,IGKV1-39,IGKV3D-7,IGKV3-7,IGKV1-16,IGKV5-2,IGKV1D-12,IGKV2D-28,IGKV3D-11,IGKV1-33,IGKV1-9,IGKV4-1,IGKV1D-17,IGKV1D-43,IGKV6D-41,IGKV6D-21,IGKV2D-30	NA	4	2	1	5	17	3	9	2	2	6	12	4	23	42	109	11	ENSRNOT00000042671_RATTU,ENST00000462693_HUMAN,ENSRNOT00000031103_RATTU,ENSRNOT00000048879_RATTU,ENSRNOT00000063862_RATTU,ENSRNOT00000048174_RATTU,ENSMUST00000103352_MOUSE,ENSECAT00000020106_HORSE,ENSRNOT00000040689_RATTU,ENSRNOT00000058443_RATTU,ENSRNOT00000064313_RATTU,ENSSSCP00000019745_SWINE,ENSRNOT00000068367_RATTU,ENSSSCP00000021421_SWINE,Deer_GLEAN_10001088_DAVID,ENST00000390264_HUMAN,ENSR…
VPREB1,VPREB3,CHCHD10,VPREB2,IGLV5-45,IGLV3-12,IGLV4-3,IGLV3-27,IGLV11-55,IGLV3-10,IGLV5-37,IGLV3-21,IGLV9-49,IGLV3-22,IGLV1-50,IGLV7-43,IGLV5-48,IGLV1-47,IGLV6-57	NA	12	12	19	9	27	8	10	17	7	8	12	15	32	17	8	6	Deer_GLEAN_10015991_DAVID,ENSSSCP00000029384_SWINE,Giraffe_VPREB1_10003860_GIRAF,GOAT_ENSBTAP00000032915_GOATS,Deer_GLEAN_10015990_DAVID,Oryx_gazella_NA_10011507_GAZEL,Giraffe_NA_10001269_GIRAF,GOAT_ENSP00000374853_GOATS,ENSMUST00000103752_MOUSE,Muntiacus_muntjak_NA_10013684_MUNTJ,Oryx_gazella_NA_10000374_GAZEL,PHO00007219_CHIRU,ENSP00000403672-D52_GRUNN,PHO00007221_CHIRU,ENSBTAP00000051240-D9_GR…
TRGV9,TRGV11	NA	2	2	3	2	4	1	2	0	0	1	1	3	2	2	0	1	KB017061.1_cdsid_EPY80788.1_CAMEL,KB017061.1_cdsid_EPY80787.1_CAMEL,GOAT_ENSP00000374863-D3_GOATS,ENSP00000375030-D23_GRUNN,ENSECAT00000015208_HORSE,ENSSSCP00000023021_SWINE,ENSBTAP00000048259-D2_GRUNN,Oryx_gazella_NA_10007725_GAZEL,BACU012622_WHALE,ENSP00000381669-D17_GRUNN,PHO00013960_CHIRU,Oryx_gazella_NA_10007726_GAZEL,ENST00000444775_HUMAN,Deer_GLEAN_10012154_DAVID,Deer_GLEAN_10005455_DAVID,…
TCRA,TRAV26-2	NA	6	1	4	11	11	0	8	4	3	0	2	1	7	1	2	1	Giraffe_NA_10007938_GIRAF,Deer_GLEAN_10000781_DAVID,Giraffe_NA_10001087_GIRAF,PHO00000924_CHIRU,Muntiacus_muntjak_NA_10002421_MUNTJ,ENSP00000374967-D12_GRUNN,ENSP00000374967-D3_GRUNN,ENSSSCP00000002254_SWINE,ENSP00000374844-D65_GRUNN,ENSP00000374962-D16_GRUNN,ENSECAT00000014264_HORSE,ENSECAT00000004085_HORSE,Oryx_gazella_NA_10000726_GAZEL,ENSSSCP00000002279_SWINE,ENSECAT00000013165_HORSE,Oryx_gaz…
TCRA	NA	23	8	14	16	31	9	16	18	4	3	9	9	14	0	15	8	ENSECAT00000016140_HORSE,ENSRNOT00000065159_RATTU,ENSBTAP00000052737-D1_GRUNN,goat_GLEAN_10000173_GOATS,ENSRNOT00000048915_RATTU,GOAT_ENSBTAP00000017034-D2_GOATS,PHO00017183_CHIRU,Muntiacus_muntjak_NA_10000263_MUNTJ,ENSECAT00000015922_HORSE,goat_GLEAN_10001909_GOATS,ENSP00000374959-D4_GRUNN,Muntiacus_muntjak_NA_10000489_MUNTJ,PHO00017179_CHIRU,ENSRNOT00000060396_RATTU,PHO00002621_CHIRU,ENSRNOT000…
NA	NA	1	1	0	0	3	0	1	0	0	1	0	1	0	0	0	0	PHO00008058_CHIRU,ENSP00000374931-D1_GRUNN,BACU008615_WHALE,Deer_GLEAN_10011249_DAVID,ENSBTAP00000048732-D21_GRUNN,ENSP00000374931-D2_GRUNN,KB017601.1_cdsid_EPY76527.1_CAMEL,sheep_GLEAN_10012671_SHEEP
V-TCR,TCRB,TRBV12-3,TRBV23OR9-2,TRBV21OR9-2	NA	27	27	29	12	37	21	16	16	15	6	5	9	25	2	4	6	sheep_GLEAN_10000160_SHEEP,ENSBTAP00000050023-D3_GRUNN,ENSBTAT00000053610_BOVIN,ENSBTAP00000048427-D37_GRUNN,sheep_GLEAN_10000149_SHEEP,SHEEP_ENSP00000374915-D4_SHEEP,Giraffe_NA_10001250_GIRAF,ENSECAT00000000871_HORSE,goat_GLEAN_10001021_GOATS,PHO00019524_CHIRU,PHO00019506_CHIRU,SHEEP_ENSBTAP00000052911-D2_SHEEP,Muntiacus_muntjak_NA_10003095_MUNTJ,PHO00019538_CHIRU,Giraffe_V-TCR_10001243_GIRAF,SH…
V-TCR,TRBV25OR9-2,TRBV24-1	NA	19	14	20	14	24	17	20	18	18	4	7	8	15	2	3	0	PHO00019550_CHIRU,KB017062.1_cdsid_EPY80729.1_CAMEL,ENSECAT00000012089_HORSE,ENSP00000374916-D33_GRUNN,Muntiacus_muntjak_NA_10003085_MUNTJ,Giraffe_NA_10001241_GIRAF,Muntiacus_muntjak_NA_10000925_MUNTJ,ENSBTAT00000052434_BOVIN,Muntiacus_muntjak_V-TCR_10003094_MUNTJ,SHEEP_ENSBTAP00000048104-D2_SHEEP,ENSBTAT00000055640_BOVIN,ENSBTAP00000049607-D1_GRUNN,ENSECAT00000007502_HORSE,Deer_GLEAN_10001959_DA…
TRGV3,TRGV8,TRGV2,TRGV5,TRGV1,TRGV4	NA	2	2	4	5	4	1	5	4	5	0	0	1	3	6	1	0	ENST00000390343_HUMAN,Oryx_gazella_TRGV3_10012398_GAZEL,ENSBTAP00000051436-D1_GRUNN,Deer_GLEAN_10000099_DAVID,ENSBTAT00000063078_BOVIN,Muntiacus_muntjak_TRGV3_10007171_MUNTJ,ENST00000426402_HUMAN,ENSECAT00000019281_HORSE,Oryx_gazella_NA_10012397_GAZEL,ENST00000390344_HUMAN,goat_GLEAN_10020227_GOATS,SHEEP_ENSBTAP00000050321_SHEEP,Muntiacus_muntjak_NA_10007064_MUNTJ,ENSECAT00000017198_HORSE,Oryx_ga…
AL590867.1,AP002962.1	NA	0	0	0	0	3	0	0	0	0	3	0	0	38	2	6	0	ENSRNOT00000049046_RATTU,BACU017271_WHALE,ENSECAT00000020522_HORSE,ENSECAT00000006386_HORSE,ENSECAT00000012598_HORSE,ENSECAT00000008892_HORSE,ENSECAT00000020932_HORSE,ENSECAT00000022400_HORSE,ENSECAT00000025444_HORSE,ENSECAT00000013443_HORSE,ENSECAT00000012253_HORSE,ENSECAT00000013980_HORSE,ENSECAT00000016353_HORSE,BACU007338_WHALE,ENSP00000394784-D39_GRUNN,ENSRNOT00000050182_RATTU,BACU013277_WHA…
NA	NA	0	6	1	0	2	0	1	0	0	4	2	0	42	0	1	1	ENSECAT00000026085_HORSE,Deer_GLEAN_10013169_DAVID,ENSECAT00000000465_HORSE,ENSECAT00000006232_HORSE,ENSMUST00000151653_MOUSE,BACU010637_WHALE,sheep_GLEAN_10002185_SHEEP,ENSBTAP00000044160-D30_GRUNN,ENSECAT00000021022_HORSE,ENSECAT00000020219_HORSE,ENSECAT00000010502_HORSE,ENSECAT00000000388_HORSE,ENSECAT00000008436_HORSE,ENSECAT00000004670_HORSE,ENSECAT00000002519_HORSE,ENSSSCP00000021497_SWINE,…
NA	NA	10	10	0	0	60	0	0	0	0	1	0	0	200	0	2	2	ENSBTAP00000051259-D89_GRUNN,ENSECAT00000008397_HORSE,ENSECAT00000008439_HORSE,ENSBTAP00000051671-D35_GRUNN,ENSECAT00000017997_HORSE,ENSBTAP00000051671-D17_GRUNN,ENSECAT00000000621_HORSE,ENSECAT00000020263_HORSE,ENSECAT00000011947_HORSE,ENSECAT00000007416_HORSE,ENSECAT00000017776_HORSE,ENSECAT00000006226_HORSE,ENSECAT00000016302_HORSE,ENSECAT00000009935_HORSE,PHO00014738_CHIRU,ENSECAT00000024347_…
NA	NA	1	1	1	0	2	0	0	0	0	2	0	0	6	0	0	0	ENSECAT00000021198_HORSE,BACU005151_WHALE,PHO00010028_CHIRU,ENSECAT00000021879_HORSE,ENSECAT00000006721_HORSE,sheep_GLEAN_10016602_SHEEP,ENSECAT00000017401_HORSE,GOAT_ENSBTAP00000046591_GOATS,ENSBTAP00000046591-D23_GRUNN,BACU008701_WHALE,ENSECAT00000009481_HORSE,ENSBTAP00000046641-D94_GRUNN,ENSECAT00000014523_HORSE
NA	NA	0	0	0	0	1	0	0	0	0	0	0	0	22	0	0	0	ENSECAT00000007625_HORSE,ENSECAT00000020032_HORSE,ENSP00000410624-D13_GRUNN,ENSECAT00000011951_HORSE,ENSECAT00000027050_HORSE,ENSECAT00000011398_HORSE,ENSECAT00000007971_HORSE,ENSECAT00000000259_HORSE,ENSECAT00000018092_HORSE,ENSECAT00000026784_HORSE,ENSECAT00000021786_HORSE,ENSECAT00000024648_HORSE,ENSECAT00000019745_HORSE,ENSECAT00000014501_HORSE,ENSECAT00000017010_HORSE,ENSECAT00000024581_HORS…
NA	NA	0	0	0	0	1	0	0	0	0	8	0	0	0	0	0	0	ENSP00000413454-D4_GRUNN,BACU014199_WHALE,BACU003914_WHALE,BACU005008_WHALE,BACU004092_WHALE,BACU003804_WHALE,BACU000162_WHALE,BACU006199_WHALE,BACU001347_WHALE
AL158821.1	NA	0	0	0	0	36	0	0	0	0	3	1	0	3	1	0	0	ENSP00000392188-D5_GRUNN,BACU007772_WHALE,ENSP00000392188-D85_GRUNN,ENSECAT00000013798_HORSE,ENSP00000392188-D8_GRUNN,ENSP00000392188-D14_GRUNN,ENSP00000392188-D17_GRUNN,ENSP00000392188-D20_GRUNN,ENSP00000392188-D52_GRUNN,ENSP00000392188-D25_GRUNN,ENSP00000392188-D41_GRUNN,ENSP00000392188-D72_GRUNN,ENSBTAP00000048967-D99_GRUNN,ENSP00000392188-D60_GRUNN,ENSP00000392188-D47_GRUNN,ENSSSCP00000026935…
TAS2R41,TAS2R60,TAS2R16,TAS2R40,TAS2R5,TAS2R3,TAS2R39,TAS2R31,TAS2R50,TAS2R7,TAS2R14,TAS2R9,TAS2R10,TAS2R20,TAS2R46,TAS2R8,TAS2R19,TAS2R13,TAS2R4,TAS2R38,TAS2R42,TAS2R1,TAS2R43,TAS2R30	GO:0004930; G-protein coupled receptor activity; Molecular Function.GO:0007186; G-protein coupled receptor protein signaling pathway; Biological Process.GO:0016021; integral to membrane; Cellular Component.GO:0050909; sensory perception of taste; Biological Process	19	20	24	4	28	15	7	4	1	1	10	5	15	24	36	36	ENSMUST00000069268_MOUSE,ENSRNOT00000024048_RATTU,PHO00013727_CHIRU,GOAT_ENSBTAP00000040608-D2_GOATS,ENSBTAP00000049472-D3_GRUNN,ENSECAT00000023867_HORSE,PHO00020052_CHIRU,ENSBTAT00000043004_BOVIN,SHEEP_ENSBTAP00000040606-D5_SHEEP,SHEEP_ENSBTAP00000040608_SHEEP,ENST00000390675_HUMAN,ENSRNOT00000040828_RATTU,GOAT_ENSP00000386201_GOATS,SHEEP_ENSBTAP00000042858_SHEEP,ENSRNOT00000007435_RATTU,ENSRNOT…
NA	NA	0	0	2	0	1	0	0	0	0	0	0	0	0	0	0	0	goat_GLEAN_10018623_GOATS,GOAT_ENSBTAP00000021810-D13_GOATS,ENSBTAP00000021810-D25_GRUNN
UGT1A1,UGT2C1,UGT2B4,UGT1A6,UGT3A1,UGT8,UGT2A3,UGT1,UGT2B18,UGT2B31,UGT1A10,UGT1A3,UGT1A7,UGT1A9,UGT2B7,UGT2B17,UGT2A1,UGT2B15,UGT2B28,UGT3A2,UGT2B11,UGT2B10,UGT1A8,UGT1A5,UGT1A4	GO:0008152; metabolic process; Biological Process.GO:0016758; transferase activity, transferring hexosyl groups; Molecular Function	11	17	17	15	23	17	26	21	15	5	18	11	13	21	12	21	ENSMUST00000113142_MOUSE,ENSMUST00000049289_MOUSE,Deer_GLEAN_10006472_DAVID,Deer_GLEAN_10006476_DAVID,ENSECAT00000016051_HORSE,Muntiacus_muntjak_UGT2B4_10000454_MUNTJ,ENSSSCP00000017284_SWINE,Muntiacus_muntjak_UGT1A6_10004454_MUNTJ,PHO00022049_CHIRU,Oryx_gazella_UGT8_10012631_GAZEL,ENSRNOT00000048482_RATTU,ENSMUST00000094649_MOUSE,SHEEP_ENSBTAP00000001733_SHEEP,Deer_GLEAN_10001125_DAVID,Muntiacus…
NA	NA	0	0	0	0	3	0	0	0	0	0	2	0	0	0	0	0	ENSSSCP00000025896_SWINE,ENSP00000352989-D3_GRUNN,ENSP00000352989-D11_GRUNN,ENSSSCP00000022916_SWINE,ENSP00000352989-D8_GRUNN
NA	NA	2	2	2	0	2	0	3	0	0	3	0	1	0	0	0	0	ENSBTAP00000007111-D1_GRUNN,PHO00020104_CHIRU,GOAT_ENSP00000277491_GOATS,BACU001531_WHALE,SHEEP_ENSBTAP00000007111_SHEEP,BACU016215_WHALE,SHEEP_ENSP00000277491_SHEEP,BACU016214_WHALE,Deer_GLEAN_10002811_DAVID,Deer_GLEAN_10002320_DAVID,Deer_GLEAN_10002810_DAVID,PHO00020105_CHIRU,ENSP00000277491-D1_GRUNN,GOAT_ENSBTAP00000007111_GOATS,KB017072.1_cdsid_EPY80556.1_CAMEL
BX255923.1,AL353608.1,AC016745.1	NA	0	0	0	0	6	0	0	0	0	0	0	0	61	3	0	0	ENSECAT00000025184_HORSE,ENSECAT00000002977_HORSE,ENSECAT00000003349_HORSE,ENSECAT00000005478_HORSE,ENSECAT00000004992_HORSE,ENSECAT00000006339_HORSE,ENSECAT00000001692_HORSE,ENSP00000384646-D38_GRUNN,ENSECAT00000023431_HORSE,ENSECAT00000014722_HORSE,ENSECAT00000005521_HORSE,ENST00000354995_HUMAN,ENSECAT00000022863_HORSE,ENSECAT00000001220_HORSE,ENSECAT00000024556_HORSE,ENSECAT00000001860_HORSE,E…
NA	NA	0	0	0	0	3	0	1	0	0	0	0	0	0	0	0	0	ENSP00000399247-D1_GRUNN,ENSP00000399247-D7_GRUNN,Deer_GLEAN_10002422_DAVID,ENSP00000399247-D5_GRUNN
CTAGE5,CTAGE1	NA	4	4	3	6	2	1	4	6	5	1	0	9	0	0	0	0	sheep_GLEAN_10010298_SHEEP,sheep_GLEAN_10008706_SHEEP,KB017124.1_cdsid_EPY79975.1_CAMEL,PHO00002473_CHIRU,Giraffe_CTAGE5_10006927_GIRAF,KB018454.1_cdsid_EPY73758.1_CAMEL,Muntiacus_muntjak_CTAGE5_10018122_MUNTJ,KB016918.1_cdsid_EPY82504.1_CAMEL,Oryx_gazella_CTAGE5_10000304_GAZEL,Oryx_gazella_CTAGE5_10011998_GAZEL,KB016891.1_cdsid_EPY82838.1_CAMEL,KB017123.1_cdsid_EPY80025.1_CAMEL,KB019236.1_cdsid_…
FAM75B	NA	0	1	0	0	1	0	0	0	0	0	0	0	0	1	0	0	SHEEP_ENSP00000347153_SHEEP,ENST00000376458_HUMAN,ENSP00000365641-D3_GRUNN
GLRX5	NA.GO:0009055; electron carrier activity; Molecular Function.GO:0015035; protein disulfide oxidoreductase activity; Molecular Function.GO:0045454; cell redox homeostasis; Biological Process	1	3	1	4	3	1	1	2	0	1	1	1	1	1	1	1	BACU007874_WHALE,ENSBTAP00000017860-D1_GRUNN,sheep_GLEAN_10018201_SHEEP,Oryx_gazella_GLRX5_10019025_GAZEL,sheep_GLEAN_10001570_SHEEP,Deer_GLEAN_10008999_DAVID,ENSECAT00000021167_HORSE,yakG043852_GRUNN,sheep_GLEAN_10014749_SHEEP,yakA04033_GRUNN,PHO00003223_CHIRU,Oryx_gazella_GLRX5_10005048_GAZEL,ENSMUST00000021522_MOUSE,Muntiacus_muntjak_Glrx5_10010223_MUNTJ,GOAT_ENSP00000328570_GOATS,Muntiacus_mu…
AKR1D1,AKR1E2,AKR1B1,AKR1A1,AKR1B10,AKR1C2,AKR1C1,AKR1C3,AP001793.1,AKR1C4,AKR1CL1,AKR1B15	GO:0016491; oxidoreductase activity; Molecular Function.GO:0055114; oxidation reduction; Biological Process.GO:0055114; oxidation-reduction process; Biological Process	21	20	22	12	25	19	15	27	10	5	12	6	16	12	25	17	Muntiacus_muntjak_NA_10022494_MUNTJ,PHO00016769_CHIRU,GOAT_ENSBTAP00000013082-D3_GOATS,ENSRNOT00000068153_RATTU,ENSSSCP00000011901_SWINE,ENSECAT00000022373_HORSE,ENSECAT00000012484_HORSE,Giraffe_NA_10012899_GIRAF,PHO00021197_CHIRU,Muntiacus_muntjak_NA_10009863_MUNTJ,Giraffe_AKR1D1_10013671_GIRAF,ENSSSCP00000011887_SWINE,Muntiacus_muntjak_AKR1B1_10003861_MUNTJ,GOAT_ENSBTAP00000030543-D3_GOATS,ENSB…
RPS17,RPS17L	GO:0003735; structural constituent of ribosome; Molecular Function.GO:0005622; intracellular; Cellular Component.GO:0005840; ribosome; Cellular Component.GO:0006412; translation; Biological Process	1	4	3	3	4	1	2	3	2	4	3	3	3	2	8	2	Oryx_gazella_RPS17_10004397_GAZEL,ENSP00000398762-D4_GRUNN,ENSMUST00000054380_MOUSE,ENSECAT00000002737_HORSE,ENSRNOT00000043609_RATTU,sheep_GLEAN_10012227_SHEEP,KB017919.1_cdsid_EPY75033.1_CAMEL,Muntiacus_muntjak_RPS17_10023819_MUNTJ,Giraffe_RPS17_10010678_GIRAF,ENSSSCP00000014971_SWINE,GOAT_ENSBTAP00000000814_GOATS,ENST00000330244_HUMAN,ENST00000330339_HUMAN,ENSP00000346046-D2_GRUNN,ENSRNOT00000…
RPS15	GO:0003735; structural constituent of ribosome; Molecular Function.GO:0005622; intracellular; Cellular Component.GO:0005840; ribosome; Cellular Component.GO:0006412; translation; Biological Process.GO:0015935; small ribosomal subunit; Cellular Component	2	5	4	5	2	1	4	3	3	4	1	5	0	1	3	2	yakG043667_GRUNN,goat_GLEAN_10009821_GOATS,KB017049.1_cdsid_EPY80877.1_CAMEL,ENSSSCP00000023972_SWINE,sheep_GLEAN_10021660_SHEEP,goat_GLEAN_10010934_GOATS,KB017889.1_cdsid_EPY75170.1_CAMEL,ENST00000233609_HUMAN,ENSRNOT00000029791_RATTU,KB016508.1_cdsid_EPY87887.1_CAMEL,BACU016056_WHALE,KB017817.1_cdsid_EQB78975.1_CAMEL,sheep_GLEAN_10014868_SHEEP,BACU001094_WHALE,goat_GLEAN_10017031_GOATS,PHO00009…
NA	NA	1	0	0	0	2	0	2	0	0	1	0	0	0	0	0	0	PHO00011874_CHIRU,Deer_GLEAN_10003042_DAVID,Deer_GLEAN_10023759_DAVID,BACU018685_WHALE,ENSBTAP00000045082-D6_GRUNN,ENSBTAP00000045082-D1_GRUNN
NA	NA	0	0	0	0	3	0	0	0	0	0	0	1	0	0	0	0	KB017091.1_cdsid_EPY80370.1_CAMEL,ENSBTAP00000049338-D16_GRUNN,ENSBTAP00000049338-D17_GRUNN,ENSBTAP00000049338-D8_GRUNN
RPS2	GO:0003735; structural constituent of ribosome; Molecular Function.GO:0005622; intracellular; Cellular Component.GO:0005840; ribosome; Cellular Component.GO:0006412; translation; Biological Process.GO:0003723; RNA binding; Molecular Function	6	5	5	5	4	1	5	9	4	11	2	6	1	1	27	9	ENSRNOT00000035575_RATTU,ENSBTAP00000020473-D3_GRUNN,PHO00018144_CHIRU,sheep_GLEAN_10019656_SHEEP,Giraffe_RPS2_10009674_GIRAF,ENSMUST00000071458_MOUSE,KB017791.1_cdsid_EPY75485.1_CAMEL,goat_GLEAN_10018581_GOATS,ENSRNOT00000058491_RATTU,ENSRNOT00000035386_RATTU,KB016750.1_cdsid_EPY84567.1_CAMEL,KB017069.1_cdsid_EPY80607.1_CAMEL,ENSRNOT00000037245_RATTU,BACU006298_WHALE,ENSMUST00000166546_MOUSE,ENS…
PRAMEF12,PRAME	NA	1	3	2	1	1	0	5	2	1	0	0	0	0	0	0	0	Deer_GLEAN_10012886_DAVID,Deer_GLEAN_10012884_DAVID,goat_GLEAN_10006285_GOATS,Muntiacus_muntjak_PRAMEF12_10000049_MUNTJ,Deer_GLEAN_10001514_DAVID,sheep_GLEAN_10004855_SHEEP,Muntiacus_muntjak_PRAMEF12_10000776_MUNTJ,Giraffe_PRAMEF12_10001717_GIRAF,Deer_GLEAN_10001523_DAVID,GOAT_ENSP00000350358-D4_GOATS,sheep_GLEAN_10004852_SHEEP,PHO00001496_CHIRU,Oryx_gazella_PRAME_10005217_GAZEL,sheep_GLEAN_10006…
NA	NA	3	0	0	0	1	0	0	0	0	0	0	0	0	0	0	1	PHO00010667_CHIRU,ENSMUST00000163240_MOUSE,PHO00010675_CHIRU,PHO00010676_CHIRU,ENSP00000389046-D34_GRUNN
NA	NA	3	1	2	0	6	0	0	0	0	1	16	0	0	0	0	0	ENSBTAP00000031832-D27_GRUNN,ENSSSCP00000023630_SWINE,ENSBTAP00000049241-D55_GRUNN,ENSSSCP00000024113_SWINE,ENSSSCP00000026419_SWINE,ENSSSCP00000025458_SWINE,PHO00020833_CHIRU,ENSSSCP00000021008_SWINE,GOAT_ENSBTAP00000045860_GOATS,ENSSSCP00000025775_SWINE,GOAT_ENSBTAP00000009260_GOATS,ENSBTAP00000045860-D53_GRUNN,ENSSSCP00000024778_SWINE,BACU005688_WHALE,ENSSSCP00000026948_SWINE,ENSSSCP0000002462…
NA	NA	2	0	0	0	3	0	0	0	0	0	0	0	0	0	0	0	ENSBTAP00000051989-D2_GRUNN,ENSBTAP00000049790-D39_GRUNN,PHO00020196_CHIRU,PHO00012546_CHIRU,ENSBTAP00000051989-D13_GRUNN
BTF3L4,BTF3	NA	6	6	6	8	7	2	12	10	3	4	4	3	2	2	5	2	SHEEP_ENSBTAP00000014646_SHEEP,SHEEP_ENSBTAP00000036691_SHEEP,GOAT_ENSP00000369965_GOATS,SHEEP_ENSBTAP00000048718_SHEEP,PHO00011182_CHIRU,Deer_GLEAN_10016209_DAVID,Deer_GLEAN_10016780_DAVID,Deer_GLEAN_10022004_DAVID,GOAT_ENSBTAP00000048718_GOATS,sheep_GLEAN_10008488_SHEEP,goat_GLEAN_10012559_GOATS,KB016946.1_cdsid_EPY82165.1_CAMEL,ENSBTAP00000048718-D1_GRUNN,ENSECAT00000026017_HORSE,ENSP000003699…
RPS10	NA.GO:0016787; hydrolase activity; Molecular Function	2	3	6	3	2	1	3	4	2	2	1	1	1	1	12	1	ENSRNOT00000043950_RATTU,goat_GLEAN_10006606_GOATS,Giraffe_Rps10_10011383_GIRAF,SHEEP_ENSBTAP00000020719_SHEEP,goat_GLEAN_10012320_GOATS,Muntiacus_muntjak_RPS10_10010322_MUNTJ,ENSRNOT00000043250_RATTU,ENSRNOT00000057291_RATTU,Muntiacus_muntjak_RPS10_10014025_MUNTJ,goat_GLEAN_10003545_GOATS,ENSECAT00000006745_HORSE,Muntiacus_muntjak_RPS10_10020674_MUNTJ,Oryx_gazella_Rps10_10012651_GAZEL,ENSRNOT000…
GIMAP4,GIMAP5,GIMAP7,GIMAP1,GIMAP6,GIMAP2,GIMAP8	GO:0005525; GTP binding; Molecular Function	10	6	16	12	22	10	11	8	7	7	4	7	9	6	6	5	yakG020170_GRUNN,goat_GLEAN_10001774_GOATS,Deer_GLEAN_10011720_DAVID,SHEEP_ENSBTAP00000001588_SHEEP,Giraffe_GIMAP4_10017320_GIRAF,GOAT_ENSBTAP00000014926-D2_GOATS,ENSBTAP00000031161-D8_GRUNN,PHO00007881_CHIRU,GOAT_ENSP00000414924-D2_GOATS,Giraffe_GIMAP5_10017315_GIRAF,Deer_GLEAN_10000809_DAVID,ENSECAT00000007594_HORSE,ENSBTAP00000052294-D7_GRUNN,Deer_GLEAN_10011726_DAVID,goat_GLEAN_10000395_GOATS…
CH1	GO:0005488; binding; Molecular Function.GO:0005576; extracellular region; Cellular Component	4	4	6	6	5	2	4	6	5	1	0	0	1	0	3	10	Muntiacus_muntjak_CH1_10008439_MUNTJ,ENSMUST00000166714_MOUSE,ENSBTAP00000031354-D1_GRUNN,PHO00002809_CHIRU,goat_GLEAN_10009932_GOATS,ENSMUST00000170232_MOUSE,ENSRNOT00000066292_RATTU,yakG021936_GRUNN,SHEEP_ENSBTAP00000047349_SHEEP,ENSMUST00000108083_MOUSE,Muntiacus_muntjak_CH1_10008436_MUNTJ,goat_GLEAN_10009934_GOATS,Giraffe_CH1_10017885_GIRAF,Deer_GLEAN_10002221_DAVID,goat_GLEAN_10009931_GOATS,…
EEF1G	GO:0003746; translation elongation factor activity; Molecular Function.GO:0005853; eukaryotic translation elongation factor 1 complex; Cellular Component.GO:0006414; translational elongation; Biological Process.GO:0005515; protein binding; Molecular Function	4	2	2	1	2	1	0	2	1	4	1	0	1	1	6	1	BACU013169_WHALE,ENSRNOT00000029884_RATTU,ENST00000378019_HUMAN,PHO00000977_CHIRU,ENSRNOT00000033831_RATTU,Oryx_gazella_Eef1g_10017354_GAZEL,ENSMUST00000052248_MOUSE,BACU005376_WHALE,ENSRNOT00000027305_RATTU,ENSSSCP00000013894_SWINE,Muntiacus_muntjak_EEF1G_10007415_MUNTJ,Giraffe_EEF1G_10009362_GIRAF,yakG002137_GRUNN,ENSRNOT00000007380_RATTU,SHEEP_ENSBTAP00000015716_SHEEP,ENSRNOT00000039555_RATTU,…
NA	NA	0	1	0	0	1	0	2	0	0	0	0	0	0	0	0	0	Deer_GLEAN_10020444_DAVID,sheep_GLEAN_10006618_SHEEP,Deer_GLEAN_10003767_DAVID,ENSP00000414550-D2_GRUNN
NA	NA	2	1	0	0	3	0	1	0	0	0	0	0	0	0	0	0	PHO00010454_CHIRU,ENSBTAP00000047592-D6_GRUNN,SHEEP_ENSBTAP00000047592-D4_SHEEP,Deer_GLEAN_10002598_DAVID,ENSBTAP00000047592-D3_GRUNN,ENSBTAP00000047592-D4_GRUNN,PHO00010452_CHIRU
NA	NA	0	0	1	0	1	0	0	0	0	1	0	0	0	0	0	0	GOAT_ENSBTAP00000034059_GOATS,ENSBTAP00000034059-D1_GRUNN,BACU000743_WHALE
HAVCR1,HAVCR2	NA	2	3	3	3	6	1	3	2	3	1	2	1	2	1	5	5	GOAT_ENSBTAP00000000626_GOATS,ENSSSCP00000026109_SWINE,ENSRNOT00000064181_RATTU,BACU000776_WHALE,ENSMUST00000109228_MOUSE,ENSECAT00000017014_HORSE,ENSECAT00000016095_HORSE,ENSRNOT00000066536_RATTU,Giraffe_HAVCR1_10008247_GIRAF,SHEEP_ENSBTAP00000000626_SHEEP,ENSBTAT00000042779_BOVIN,ENSP00000274532-D2_GRUNN,ENSP00000403333-D2_GRUNN,KB016558.1_cdsid_EQB77270.1_CAMEL,Giraffe_Havcr1_10008242_GIRAF,EN…
RPL13	GO:0003735; structural constituent of ribosome; Molecular Function.GO:0005622; intracellular; Cellular Component.GO:0005840; ribosome; Cellular Component.GO:0006412; translation; Biological Process	5	2	3	2	3	1	1	2	4	2	1	3	1	1	11	3	KB016428.1_cdsid_EQB76990.1_CAMEL,ENSBTAP00000052607-D1_GRUNN,Deer_GLEAN_10010435_DAVID,BACU004975_WHALE,ENSRNOT00000019871_RATTU,goat_GLEAN_10013615_GOATS,ENST00000452368_HUMAN,KB019265.1_cdsid_EPY73071.1_CAMEL,PHO00000405_CHIRU,ENSMUST00000079960_MOUSE,ENSRNOT00000041303_RATTU,ENSBTAP00000052483-D1_GRUNN,Muntiacus_muntjak_RPL13_10007315_MUNTJ,ENSRNOT00000046777_RATTU,ENSMUST00000000756_MOUSE,EN…
IFNT	NA.GO:0005126; cytokine receptor binding; Molecular Function.GO:0005576; extracellular region; Cellular Component.GO:0006952; defense response; Biological Process	0	0	1	0	1	0	0	1	0	0	0	0	0	0	0	0	Muntiacus_muntjak_IFNT_10003599_MUNTJ,ENSBTAP00000045038-D2_GRUNN,GOAT_ENSBTAP00000045038_GOATS
MKRN1	NA.GO:0003676; nucleic acid binding; Molecular Function.GO:0008270; zinc ion binding; Molecular Function	0	0	0	3	3	0	0	0	0	0	0	0	0	0	0	0	ENSBTAP00000048771-D3_GRUNN,ENSBTAP00000048771-D2_GRUNN,ENSBTAP00000048771-D4_GRUNN,Oryx_gazella_MKRN1_10009889_GAZEL,Oryx_gazella_MKRN1_10008887_GAZEL,Oryx_gazella_MKRN1_10001849_GAZEL
GALP	NA	0	1	0	0	1	0	0	0	0	0	1	1	1	1	1	1	sheep_GLEAN_10002338_SHEEP,KB016597.1_cdsid_EPY86609.1_CAMEL,ENST00000357330_HUMAN,ENSMUST00000037553_MOUSE,ENSSSCP00000003598_SWINE,ENSBTAP00000018838-D1_GRUNN,ENSRNOT00000034854_RATTU,ENSECAT00000026524_HORSE
NA	NA	0	0	1	0	1	0	0	0	0	0	0	1	0	0	0	0	goat_GLEAN_10020447_GOATS,yakA02780_GRUNN,KB016892.1_cdsid_EPY82808.1_CAMEL
NA	NA	2	2	2	0	7	0	1	0	0	1	0	1	0	0	0	0	Deer_GLEAN_10010058_DAVID,BACU010378_WHALE,goat_GLEAN_10007309_GOATS,sheep_GLEAN_10010585_SHEEP,PHO00014825_CHIRU,ENSP00000335566-D3_GRUNN,ENSBTAP00000053838-D3_GRUNN,KB017230.1_cdsid_EQB78525.1_CAMEL,ENSBTAP00000053838-D4_GRUNN,goat_GLEAN_10007310_GOATS,ENSP00000399905-D4_GRUNN,ENSP00000335566-D4_GRUNN,ENSP00000334287-D1_GRUNN,sheep_GLEAN_10010586_SHEEP,PHO00014811_CHIRU,ENSP00000335566-D2_GRUNN
RPS4,RPS4Y1,RPS4X,RPS4Y2,RPS4XP21	GO:0003735; structural constituent of ribosome; Molecular Function.GO:0005622; intracellular; Cellular Component.GO:0005840; ribosome; Cellular Component.GO:0006412; translation; Biological Process.GO:0003723; RNA binding; Molecular Function	9	10	12	8	16	7	6	4	3	11	2	5	2	4	5	3	ENSBTAP00000051734-D1_GRUNN,goat_GLEAN_10005314_GOATS,PHO00010115_CHIRU,ENSBTAP00000050264-D12_GRUNN,Oryx_gazella_RPS4_10002742_GAZEL,Oryx_gazella_RPS4_10022338_GAZEL,ENSBTAP00000051734-D11_GRUNN,SHEEP_ENSP00000362744_SHEEP,ENSECAT00000011336_HORSE,Oryx_gazella_RPS4_10007489_GAZEL,PHO00002564_CHIRU,Muntiacus_muntjak_RPS4_10005486_MUNTJ,ENSBTAT00000063361_BOVIN,KB017263.1_cdsid_EPY78642.1_CAMEL,EN…
NA	NA	0	0	0	0	5	0	0	0	0	0	0	0	0	0	0	0	ENSBTAP00000051546-D13_GRUNN,ENSBTAP00000051546-D9_GRUNN,ENSBTAP00000051546-D1_GRUNN,ENSBTAP00000051546-D14_GRUNN,ENSBTAP00000051546-D10_GRUNN
RPA2,RPA4	GO:0003676; nucleic acid binding; Molecular Function	1	1	1	3	5	1	1	2	1	3	1	3	1	2	1	1	Giraffe_RPA2_10009453_GIRAF,KB016829.1_cdsid_EPY83582.1_CAMEL,BACU010597_WHALE,Oryx_gazella_RPA2_10011126_GAZEL,ENSMUST00000102561_MOUSE,GOAT_ENSP00000363015_GOATS,yakA03407_GRUNN,ENSRNOT00000017549_RATTU,KB018069.1_cdsid_EPY74457.1_CAMEL,ENST00000373909_HUMAN,Muntiacus_muntjak_RPA2_10023898_MUNTJ,yakA22683_GRUNN,ENSBTAP00000048994-D7_GRUNN,ENST00000373040_HUMAN,KB016427.1_cdsid_EPY89179.1_CAMEL,…
NA	NA	0	1	0	0	3	0	0	0	0	6	0	0	303	0	0	0	ENSECAT00000010097_HORSE,ENSECAT00000003181_HORSE,ENSECAT00000002743_HORSE,ENSECAT00000005969_HORSE,ENSECAT00000003227_HORSE,ENSECAT00000002781_HORSE,ENSECAT00000002233_HORSE,ENSECAT00000005763_HORSE,ENSECAT00000015730_HORSE,ENSECAT00000004921_HORSE,ENSECAT00000009777_HORSE,SHEEP_ENSBTAP00000049884_SHEEP,ENSECAT00000005179_HORSE,ENSECAT00000002697_HORSE,ENSBTAP00000043551-D89_GRUNN,ENSECAT0000001…
NA	NA	0	1	0	0	1	0	0	0	0	0	0	1	0	0	0	0	KB017021.1_cdsid_EPY81142.1_CAMEL,sheep_GLEAN_10008911_SHEEP,yakG015188_GRUNN
XAGE5,PAGE3	NA	0	0	1	0	2	0	2	2	1	0	0	0	0	0	0	0	Muntiacus_muntjak_XAGE5_10000411_MUNTJ,Muntiacus_muntjak_PAGE3_10001376_MUNTJ,ENSP00000364110-D2_GRUNN,ENSP00000364107-D2_GRUNN,Deer_GLEAN_10000609_DAVID,Giraffe_NA_10005077_GIRAF,Deer_GLEAN_10000657_DAVID,GOAT_ENSP00000364089_GOATS
NA	NA	0	0	0	2	1	0	0	3	2	3	0	0	0	0	0	0	Muntiacus_muntjak_NA_10016053_MUNTJ,Giraffe_NA_10009298_GIRAF,BACU008995_WHALE,Muntiacus_muntjak_NA_10016055_MUNTJ,BACU008996_WHALE,Oryx_gazella_NA_10011146_GAZEL,Oryx_gazella_NA_10011147_GAZEL,yakA10173_GRUNN,Muntiacus_muntjak_NA_10016054_MUNTJ,Giraffe_NA_10009297_GIRAF,BACU008997_WHALE
AADACL2,AADACL3,AADAC,AADACL4,NCEH1	GO:0008152; metabolic process; Biological Process.GO:0016787; hydrolase activity; Molecular Function.GO:0004091; carboxylesterase activity; Molecular Function.GO:0016021; integral to membrane; Cellular Component	6	7	5	3	6	4	7	6	7	1	5	2	4	5	11	12	Deer_GLEAN_10023815_DAVID,ENSP00000365395-D2_GRUNN,ENSMUST00000105747_MOUSE,ENST00000538775_HUMAN,SHEEP_ENSBTAP00000026745_SHEEP,ENSRNOT00000068281_RATTU,ENSBTAT00000020432_BOVIN,Oryx_gazella_AADACL4_10011566_GAZEL,GOAT_ENSP00000232892_GOATS,ENSMUST00000105749_MOUSE,PHO00015506_CHIRU,SHEEP_ENSP00000365395_SHEEP,KB017296.1_cdsid_EPY78447.1_CAMEL,ENSRNOT00000034394_RATTU,ENSBTAT00000017800_BOVIN,GO…
MYADM,MYADML2	GO:0016020; membrane; Cellular Component.NA.GO:0006457; protein folding; Biological Process.GO:0016272; prefoldin complex; Cellular Component.GO:0051082; unfolded protein binding; Molecular Function	25	29	32	36	23	17	23	25	20	5	7	9	2	2	3	2	ENSSSCP00000019400_SWINE,Oryx_gazella_MYADM_10000251_GAZEL,Deer_GLEAN_10011130_DAVID,Deer_GLEAN_10011128_DAVID,Giraffe_MYADM_10012765_GIRAF,GOAT_ENSBTAP00000013409-D25_GOATS,Oryx_gazella_MYADM_10004310_GAZEL,ENSBTAT00000036189_BOVIN,Oryx_gazella_MYADM_10001660_GAZEL,Oryx_gazella_MYADM_10012431_GAZEL,SHEEP_ENSBTAP00000000049_SHEEP,PHO00000122_CHIRU,ENSBTAP00000023688-D17_GRUNN,BACU016097_WHALE,PHO…
NA	NA	0	1	0	0	1	0	0	0	0	0	0	0	0	0	0	0	sheep_GLEAN_10002447_SHEEP,ENSBTAP00000039316-D1_GRUNN
NA	GO:0005488; binding; Molecular Function.NA	0	0	1	0	1	0	1	0	1	0	0	1	0	0	1	0	ENSRNOT00000059495_RATTU,Deer_GLEAN_10021097_DAVID,KB017214.1_cdsid_EPY79001.1_CAMEL,yakG026083_GRUNN,goat_GLEAN_10019586_GOATS,Giraffe_NCRNA00083_10014936_GIRAF
HS3ST3B1,HS3ST4,HS3ST2,HS3ST3A1	GO:0008146; sulfotransferase activity; Molecular Function	1	1	0	2	1	0	1	2	4	0	0	1	0	0	1	0	KB017158.1_cdsid_EPY79546.1_CAMEL,ENSRNOT00000055036_RATTU,Giraffe_Hs3st3b1_10007570_GIRAF,Giraffe_HS3ST4_10007258_GIRAF,Giraffe_HS3ST2_10006775_GIRAF,PHO00002197_CHIRU,Oryx_gazella_HS3ST4_10003602_GAZEL,Giraffe_HS3ST3A1_10007573_GIRAF,Muntiacus_muntjak_HS3ST2_10004120_MUNTJ,sheep_GLEAN_10012794_SHEEP,Deer_GLEAN_10005443_DAVID,yakA12471_GRUNN,Oryx_gazella_HS3ST2_10010265_GAZEL,Muntiacus_muntjak_H…
OPHN1,ARHGAP42	NA	2	2	0	1	1	0	1	0	2	3	0	0	0	0	2	0	PHO00020232_CHIRU,Giraffe_OPHN1_10002722_GIRAF,BACU012742_WHALE,Oryx_gazella_OPHN1_10001418_GAZEL,Deer_GLEAN_10012550_DAVID,BACU014485_WHALE,ENSBTAP00000046305-D1_GRUNN,ENSRNOT00000009167_RATTU,BACU015985_WHALE,PHO00000353_CHIRU,SHEEP_ENSBTAP00000046305_SHEEP,sheep_GLEAN_10018955_SHEEP,ENSRNOT00000057983_RATTU,Giraffe_ARHGAP42_10003559_GIRAF
AVP,OXT	NA	2	0	0	1	2	0	0	1	0	0	0	0	0	0	0	0	PHO00015555_CHIRU,ENSBTAP00000010554-D1_GRUNN,Oryx_gazella_AVP_10011945_GAZEL,PHO00015524_CHIRU,ENSP00000217386-D2_GRUNN,Muntiacus_muntjak_OXT_10022584_MUNTJ
HNRNPC,RALYL	NA.GO:0003676; nucleic acid binding; Molecular Function	0	0	3	1	1	0	2	1	0	1	1	2	0	0	1	0	ENSSSCP00000026867_SWINE,KB018419.1_cdsid_EPY73859.1_CAMEL,Deer_GLEAN_10022417_DAVID,goat_GLEAN_10006356_GOATS,yakA16470_GRUNN,ENSRNOT00000068507_RATTU,Deer_GLEAN_10021880_DAVID,Muntiacus_muntjak_RALYL_10016648_MUNTJ,Oryx_gazella_Hnrnpc_10014111_GAZEL,BACU008398_WHALE,goat_GLEAN_10017461_GOATS,goat_GLEAN_10002780_GOATS,KB017179.1_cdsid_EPY79279.1_CAMEL
RPL7A	NA	3	3	3	5	2	1	4	6	5	1	1	6	3	1	50	13	ENSBTAT00000015358_BOVIN,Muntiacus_muntjak_RPL7A_10007421_MUNTJ,ENSMUST00000071565_MOUSE,ENSRNOT00000048783_RATTU,ENSRNOT00000031043_RATTU,Giraffe_RPL7A_10008783_GIRAF,Oryx_gazella_RPL7A_10015241_GAZEL,ENSMUST00000090170_MOUSE,ENSRNOT00000051207_RATTU,ENSRNOT00000043491_RATTU,ENSRNOT00000044873_RATTU,ENSRNOT00000041848_RATTU,goat_GLEAN_10003802_GOATS,ENSRNOT00000051387_RATTU,Muntiacus_muntjak_RPL…
RPLP1	GO:0003735; structural constituent of ribosome; Molecular Function.GO:0005622; intracellular; Cellular Component.GO:0005840; ribosome; Cellular Component.GO:0006414; translational elongation; Biological Process.GO:0006412; translation; Biological Process	5	1	2	2	6	2	18	10	2	9	6	4	4	1	6	6	BACU017955_WHALE,ENSSSCP00000004602_SWINE,Muntiacus_muntjak_RPLP1_10014367_MUNTJ,ENSP00000395735-D2_GRUNN,ENSP00000346037-D12_GRUNN,BACU015251_WHALE,PHO00013093_CHIRU,Deer_GLEAN_10023335_DAVID,Muntiacus_muntjak_RPLP1_10014948_MUNTJ,Deer_GLEAN_10023382_DAVID,ENSSSCP00000010335_SWINE,ENSECAT00000025303_HORSE,Deer_GLEAN_10005252_DAVID,Deer_GLEAN_10006498_DAVID,PHO00002072_CHIRU,BACU007707_WHALE,Munt…
RPL37A-PS1,RPL37A	GO:0003735; structural constituent of ribosome; Molecular Function.GO:0005622; intracellular; Cellular Component.GO:0005840; ribosome; Cellular Component.GO:0006412; translation; Biological Process	2	5	4	4	2	1	6	2	2	5	1	4	2	1	7	2	Deer_GLEAN_10018523_DAVID,BACU019524_WHALE,Deer_GLEAN_10017148_DAVID,goat_GLEAN_10006708_GOATS,KB017978.1_cdsid_EPY74765.1_CAMEL,Oryx_gazella_Rpl37a-ps1_10004321_GAZEL,ENSECAT00000003621_HORSE,BACU019525_WHALE,Deer_GLEAN_10019875_DAVID,KB016813.1_cdsid_EPY83727.1_CAMEL,ENSMUST00000165488_MOUSE,sheep_GLEAN_10018129_SHEEP,BACU019526_WHALE,PHO00000825_CHIRU,ENSRNOT00000052265_RATTU,KB017173.1_cdsid_…
RPS28	GO:0003735; structural constituent of ribosome; Molecular Function.GO:0005622; intracellular; Cellular Component.GO:0005840; ribosome; Cellular Component.GO:0006412; translation; Biological Process	1	2	2	3	4	1	2	2	2	0	1	0	1	0	5	2	Giraffe_Rps28_10006513_GIRAF,Deer_GLEAN_10009369_DAVID,ENSMUST00000087342_MOUSE,Oryx_gazella_Rps28_10010123_GAZEL,Oryx_gazella_Rps28_10018136_GAZEL,ENSECAT00000018174_HORSE,sheep_GLEAN_10017178_SHEEP,Muntiacus_muntjak_Rps28_10011271_MUNTJ,Deer_GLEAN_10003326_DAVID,ENSBTAT00000003201_BOVIN,goat_GLEAN_10006034_GOATS,ENSRNOT00000051208_RATTU,GOAT_ENSBTAP00000003201_GOATS,PHO00006797_CHIRU,yakG007769…
SNR-4,SNRPD2,SMD2	NA	1	3	1	2	2	1	1	4	2	4	1	1	1	1	1	4	BACU009137_WHALE,Giraffe_snr-4_10015376_GIRAF,Giraffe_Snrpd2_10014143_GIRAF,sheep_GLEAN_10013923_SHEEP,ENSP00000342374-D1_GRUNN,ENSMUST00000049294_MOUSE,ENSMUST00000081132_MOUSE,GOAT_ENSBTAP00000016153_GOATS,Muntiacus_muntjak_Snrpd2_10005265_MUNTJ,PHO00008974_CHIRU,Oryx_gazella_Snrpd2_10014180_GAZEL,ENSBTAP00000016153-D3_GRUNN,ENSBTAT00000016153_BOVIN,Oryx_gazella_smd2_10021116_GAZEL,BACU020192_W…
UQCRB	GO:0006122; mitochondrial electron transport, ubiquinol to cytochrome c; Biological Process.GO:0008121; ubiquinol-cytochrome-c reductase activity; Molecular Function	2	2	2	1	3	1	4	1	1	3	0	0	1	1	2	1	Muntiacus_muntjak_UQCRB_10000313_MUNTJ,Giraffe_UQCRB_10011789_GIRAF,ENST00000287022_HUMAN,BACU019297_WHALE,ENSBTAP00000001993-D1_GRUNN,ENSBTAP00000008748-D1_GRUNN,Deer_GLEAN_10011073_DAVID,yakG045199_GRUNN,Deer_GLEAN_10023505_DAVID,Deer_GLEAN_10013593_DAVID,ENSMUST00000021993_MOUSE,GOAT_ENSBTAP00000008748_GOATS,ENSRNOT00000046035_RATTU,ENSBTAT00000001993_BOVIN,SHEEP_ENSBTAP00000008748_SHEEP,PHO00…
GVINP1,GVIN1	NA.GO:0003924; GTPase activity; Molecular Function.GO:0005525; GTP binding; Molecular Function	1	2	4	7	2	1	1	1	1	1	1	1	1	0	1	2	ENSECAT00000002542_HORSE,goat_GLEAN_10008308_GOATS,ENSRNOT00000041360_RATTU,goat_GLEAN_10007289_GOATS,ENSBTAP00000049852-D2_GRUNN,Oryx_gazella_Gvin1_10000615_GAZEL,Oryx_gazella_GVINP1_10001781_GAZEL,Deer_GLEAN_10006183_DAVID,Oryx_gazella_GVINP1_10000614_GAZEL,goat_GLEAN_10000473_GOATS,ENSSSCP00000015547_SWINE,Oryx_gazella_GVINP1_10001782_GAZEL,ENSMUST00000006667_MOUSE,Muntiacus_muntjak_GVINP1_100…
NA	NA	0	0	1	0	1	0	0	0	0	0	0	0	0	0	0	0	ENSP00000407706-D2_GRUNN,goat_GLEAN_10005537_GOATS
NA	NA	3	2	1	0	3	0	0	0	0	0	0	1	1	0	1	0	PHO00022137_CHIRU,PHO00012955_CHIRU,PHO00004922_CHIRU,sheep_GLEAN_10003743_SHEEP,ENSBTAP00000042205-D1_GRUNN,GOAT_ENSP00000303316_GOATS,ENSRNOT00000000129_RATTU,KB017174.1_cdsid_EPY79337.1_CAMEL,ENSBTAP00000052062-D1_GRUNN,SHEEP_ENSP00000303316_SHEEP,ENSP00000303316-D1_GRUNN,ENSECAT00000017619_HORSE
GBP4,GBP5,GBP6	GO:0003924; GTPase activity; Molecular Function.GO:0005525; GTP binding; Molecular Function.GO:0006955; immune response; Biological Process	0	1	0	3	1	0	1	3	1	0	0	3	0	0	1	0	KB018312.1_cdsid_EPY73974.1_CAMEL,KE541252.1_cdsid_EPY72384.1_CAMEL,ENSRNOT00000055388_RATTU,Muntiacus_muntjak_Gbp5_10001129_MUNTJ,Oryx_gazella_Gbp4_10000380_GAZEL,Deer_GLEAN_10020138_DAVID,KB018629.1_cdsid_EPY73519.1_CAMEL,sheep_GLEAN_10006559_SHEEP,Oryx_gazella_Gbp4_10000250_GAZEL,Muntiacus_muntjak_Gbp4_10000609_MUNTJ,Muntiacus_muntjak_GBP6_10000481_MUNTJ,ENSBTAP00000032624-D3_GRUNN,Giraffe_GBP…
NA	NA	1	1	1	0	3	0	0	0	0	0	0	0	0	0	0	0	ENSBTAP00000045710-D6_GRUNN,SHEEP_ENSBTAP00000045710_SHEEP,ENSBTAP00000045710-D4_GRUNN,ENSBTAP00000045710-D1_GRUNN,PHO00011388_CHIRU,GOAT_ENSBTAP00000045710_GOATS
C7ORF68	NA	0	0	1	0	1	0	0	0	0	0	0	0	0	1	1	1	ENST00000257696_HUMAN,ENSP00000388871-D3_GRUNN,goat_GLEAN_10014427_GOATS,ENSRNOT00000042647_RATTU,ENSMUST00000115289_MOUSE
KAAG1	NA	0	0	1	0	1	0	0	0	0	0	0	0	0	1	0	0	ENSP00000274766-D1_GRUNN,ENST00000274766_HUMAN,GOAT_ENSP00000274766_GOATS
NA	NA	4	2	1	0	22	0	0	0	0	0	0	0	1	0	0	0	PHO00011457_CHIRU,ENSBTAP00000044190-D45_GRUNN,ENSBTAP00000044185-D96_GRUNN,ENSBTAP00000048538-D53_GRUNN,ENSBTAP00000047951-D27_GRUNN,ENSBTAP00000044190-D85_GRUNN,ENSBTAP00000044401-D4_GRUNN,ENSBTAP00000044190-D8_GRUNN,PHO00003844_CHIRU,ENSBTAP00000045504-D76_GRUNN,ENSECAT00000026157_HORSE,goat_GLEAN_10015788_GOATS,ENSBTAP00000048365-D68_GRUNN,SHEEP_ENSBTAP00000044202-D16_SHEEP,ENSBTAP00000044190…
FAM24B,FAM24A	NA	2	1	2	0	2	0	0	0	0	1	2	0	1	2	2	2	GOAT_ENSP00000357889_GOATS,ENST00000368896_HUMAN,ENSP00000357892-D1_GRUNN,ENSSSCP00000021026_SWINE,ENST00000368894_HUMAN,GOAT_ENSP00000357889-D2_GOATS,ENSRNOT00000036128_RATTU,ENSECAT00000015534_HORSE,PHO00006824_CHIRU,ENSP00000357889-D1_GRUNN,ENSRNOT00000064511_RATTU,ENSMUST00000033146_MOUSE,SHEEP_ENSP00000357889_SHEEP,BACU020405_WHALE,PHO00006830_CHIRU,ENSSSCP00000024963_SWINE,ENSMUST0000003314…
AC125494.1	NA	0	0	1	0	1	0	0	0	0	0	0	0	0	1	0	0	ENSP00000384049-D1_GRUNN,ENST00000407384_HUMAN,GOAT_ENSP00000384049_GOATS
NA	NA	0	0	1	0	1	0	0	0	0	0	0	0	0	0	0	0	GOAT_ENSP00000389185_GOATS,ENSP00000389185-D1_GRUNN
NA	NA	2	1	2	1	2	0	1	0	0	0	0	0	0	0	0	0	goat_GLEAN_10002863_GOATS,ENSP00000400153-D1_GRUNN,PHO00007781_CHIRU,Deer_GLEAN_10009529_DAVID,PHO00000343_CHIRU,ENSP00000400153-D2_GRUNN,Oryx_gazella_NA_10000024_GAZEL,sheep_GLEAN_10001423_SHEEP,GOAT_ENSP00000400153_GOATS
C6ORF1	NA	0	0	1	0	1	0	0	0	0	0	0	0	0	1	0	0	ENST00000476320_HUMAN,ENSP00000418062-D1_GRUNN,GOAT_ENSP00000418062_GOATS
NA	NA	1	0	0	0	1	0	0	0	0	0	0	0	1	0	1	0	PHO00004596_CHIRU,ENSECAT00000012722_HORSE,ENSRNOT00000063899_RATTU,ENSP00000382582-D1_GRUNN
NA	NA	0	0	1	0	1	0	0	0	0	0	0	0	0	0	0	0	goat_GLEAN_10000304_GOATS,ENSBTAP00000002617-D7_GRUNN
NA	NA	1	0	1	0	11	0	0	0	0	0	1	0	0	0	0	7	goat_GLEAN_10004163_GOATS,ENSBTAP00000050724-D2_GRUNN,ENSMUST00000165698_MOUSE,ENSMUST00000172174_MOUSE,ENSBTAP00000051706-D19_GRUNN,ENSMUST00000172275_MOUSE,ENSBTAP00000050080-D12_GRUNN,ENSBTAP00000050621-D92_GRUNN,ENSBTAP00000050171-D99_GRUNN,ENSBTAP00000050593-D1_GRUNN,ENSBTAP00000047790-D43_GRUNN,ENSMUST00000166456_MOUSE,ENSBTAP00000051584-D52_GRUNN,ENSMUST00000165694_MOUSE,PHO00016390_CHIRU,…
NA	NA	0	0	0	0	9	0	0	0	0	0	0	0	0	0	0	0	ENSBTAP00000048449-D10_GRUNN,ENSBTAP00000049061-D27_GRUNN,ENSBTAP00000050796-D21_GRUNN,ENSBTAP00000050791-D1_GRUNN,ENSBTAP00000049279-D34_GRUNN,ENSBTAP00000048593-D12_GRUNN,ENSBTAP00000048400-D26_GRUNN,ENSBTAP00000046290-D13_GRUNN,ENSBTAP00000052698-D21_GRUNN
NA	NA	0	0	0	0	2	0	3	0	0	0	0	0	0	0	0	0	ENSBTAP00000051006-D29_GRUNN,Deer_GLEAN_10012964_DAVID,ENSBTAP00000051626-D23_GRUNN,Deer_GLEAN_10007493_DAVID,Deer_GLEAN_10023152_DAVID
NA	NA	0	0	1	0	1	0	0	0	0	0	0	0	0	0	0	0	goat_GLEAN_10010902_GOATS,yakA16889_GRUNN
LCE3C	NA	2	0	0	1	2	0	0	1	1	0	0	0	0	0	0	0	ENSP00000357778-D1_GRUNN,ENSP00000334644-D1_GRUNN,PHO00013573_CHIRU,PHO00013622_CHIRU,Giraffe_LCE3C_10009792_GIRAF,Muntiacus_muntjak_NA_10001064_MUNTJ,Oryx_gazella_LCE3C_10001255_GAZEL
DEFB130,RP11-1236K1.1	NA	1	0	0	0	2	0	0	0	0	0	0	0	0	2	2	2	ENST00000400079_HUMAN,PHO00021759_CHIRU,ENSMUST00000100492_MOUSE,ENSP00000382951-D2_GRUNN,ENSRNOT00000059215_RATTU,ENSRNOT00000059213_RATTU,ENST00000437818_HUMAN,ENSP00000392568-D3_GRUNN,ENSMUST00000100493_MOUSE
MDK	NA	0	1	0	0	1	0	0	0	0	0	0	0	0	1	0	0	ENSP00000385946-D2_GRUNN,SHEEP_ENSP00000385946_SHEEP,ENST00000405098_HUMAN
ERVW-1,ERVFRD-1	NA	0	0	0	0	2	0	1	0	0	0	0	0	0	2	0	2	ENSP00000419945-D23_GRUNN,ENSMUST00000059362_MOUSE,ENSMUST00000149604_MOUSE,ENST00000493463_HUMAN,ENST00000472091_HUMAN,ENSP00000420174-D1_GRUNN,Deer_GLEAN_10019312_DAVID
DEFB134	NA	0	1	0	0	1	0	0	0	0	0	1	0	0	1	0	0	ENSSSCP00000010354_SWINE,ENSP00000371640-D1_GRUNN,SHEEP_ENSP00000371640_SHEEP,ENST00000526438_HUMAN
AC004017.1	NA	0	0	0	0	8	0	0	0	0	6	0	0	0	1	0	0	ENSP00000351657-D25_GRUNN,ENSP00000351657-D16_GRUNN,ENSP00000351657-D21_GRUNN,ENST00000541705_HUMAN,ENSP00000351657-D24_GRUNN,ENSP00000351657-D85_GRUNN,BACU020516_WHALE,ENSP00000351657-D5_GRUNN,ENSP00000351657-D92_GRUNN,BACU020517_WHALE,BACU020515_WHALE,ENSP00000351657-D51_GRUNN,BACU018399_WHALE,BACU018400_WHALE,BACU018401_WHALE
NA	NA	0	1	0	0	1	0	1	0	0	0	0	0	0	0	0	0	yakA09427_GRUNN,Deer_GLEAN_10016375_DAVID,sheep_GLEAN_10008200_SHEEP
NA	NA	1	0	0	0	1	0	0	0	0	0	0	0	0	0	0	1	ENSP00000416268-D2_GRUNN,PHO00011513_CHIRU,ENSMUST00000034033_MOUSE
NA	NA	2	1	0	0	14	0	0	0	0	0	0	0	1	0	0	1	ENSMUST00000172100_MOUSE,ENSBTAP00000052559-D12_GRUNN,ENSBTAP00000041044-D28_GRUNN,ENSBTAP00000004095-D40_GRUNN,ENSBTAP00000037642-D19_GRUNN,ENSBTAP00000036190-D23_GRUNN,SHEEP_ENSBTAP00000045112_SHEEP,ENSBTAP00000045112-D1_GRUNN,ENSBTAP00000011244-D33_GRUNN,ENSECAT00000004465_HORSE,ENSBTAP00000041072-D3_GRUNN,ENSBTAP00000006229-D11_GRUNN,PHO00011489_CHIRU,ENSBTAP00000050197-D8_GRUNN,ENSBTAP000000…
NA	NA	1	0	0	0	2	0	0	0	0	0	0	0	0	0	0	0	ENSBTAP00000051740-D37_GRUNN,ENSBTAP00000051740-D5_GRUNN,PHO00007010_CHIRU
NA	NA	0	2	0	0	10	0	0	0	0	1	0	0	0	0	0	0	sheep_GLEAN_10017739_SHEEP,BACU001425_WHALE,ENSBTAP00000035606-D57_GRUNN,ENSBTAP00000052602-D85_GRUNN,ENSBTAP00000048765-D44_GRUNN,ENSBTAP00000015113-D33_GRUNN,ENSBTAP00000007724-D26_GRUNN,ENSBTAP00000048212-D31_GRUNN,ENSBTAP00000043317-D57_GRUNN,ENSBTAP00000048224-D11_GRUNN,sheep_GLEAN_10021060_SHEEP,ENSBTAP00000029910-D12_GRUNN,ENSBTAP00000047714-D19_GRUNN
NA	NA	0	1	0	0	2	0	0	0	0	0	0	0	0	0	0	0	sheep_GLEAN_10010071_SHEEP,ENSBTAP00000050214-D22_GRUNN,ENSBTAP00000042355-D54_GRUNN
NA	NA	1	0	0	0	4	0	0	0	0	0	0	0	0	0	0	0	ENSBTAP00000026743-D16_GRUNN,ENSBTAP00000026742-D94_GRUNN,ENSBTAP00000007802-D5_GRUNN,ENSBTAP00000052544-D72_GRUNN,PHO00019807_CHIRU
NA	NA	0	1	0	0	1	0	0	0	0	0	0	0	0	0	0	0	SHEEP_ENSBTAP00000030101_SHEEP,ENSBTAP00000030101-D1_GRUNN
NA	NA	0	1	0	0	1	0	0	0	0	0	0	0	0	0	0	0	SHEEP_ENSBTAP00000045912_SHEEP,ENSBTAP00000045912-D1_GRUNN
NA	NA	0	1	0	0	1	0	0	0	0	0	0	0	0	0	0	0	SHEEP_ENSBTAP00000050407_SHEEP,ENSBTAP00000050407-D4_GRUNN
NA	NA	0	1	0	0	1	0	0	0	0	0	0	0	0	0	0	0	SHEEP_ENSBTAP00000051118_SHEEP,ENSBTAP00000051118-D1_GRUNN
NA	NA	1	1	0	0	3	0	0	0	0	0	0	0	0	0	0	0	ENSP00000416257-D1_GRUNN,ENSP00000416257-D9_GRUNN,PHO00007271_CHIRU,ENSP00000416257-D37_GRUNN,SHEEP_ENSP00000416257_SHEEP
NA	NA	1	0	0	0	2	0	0	0	0	0	0	0	0	0	0	0	ENSP00000389881-D1_GRUNN,ENSP00000389881-D2_GRUNN,PHO00006676_CHIRU
NA	NA	1	0	0	0	2	0	0	0	0	0	0	0	0	0	0	0	ENSP00000372534-D1_GRUNN,ENSP00000401893-D1_GRUNN,PHO00008741_CHIRU
NA	NA	0	0	0	0	3	0	0	0	0	0	0	0	0	0	0	0	ENSBTAP00000008409-D2_GRUNN,ENSBTAP00000008409-D3_GRUNN,ENSBTAP00000008409-D1_GRUNN
NA	NA	0	0	0	0	4	0	0	0	0	0	0	0	0	0	0	0	ENSBTAP00000026339-D2_GRUNN,ENSBTAP00000026339-D3_GRUNN,ENSBTAP00000026339-D4_GRUNN,ENSBTAP00000026339-D1_GRUNN
NA	NA	0	0	0	0	3	0	0	0	0	0	0	0	0	0	0	0	ENSBTAP00000042325-D2_GRUNN,ENSBTAP00000042325-D5_GRUNN,ENSBTAP00000042325-D1_GRUNN
NA	NA	0	0	0	0	3	0	0	0	0	0	0	0	0	0	0	0	ENSP00000407732-D6_GRUNN,ENSP00000389912-D25_GRUNN,ENSP00000389912-D15_GRUNN
NA	NA	0	0	0	0	3	0	0	0	0	0	0	0	0	0	0	0	ENSP00000392610-D60_GRUNN,ENSP00000392610-D64_GRUNN,ENSP00000392610-D22_GRUNN
NA	NA	0	0	0	0	3	0	0	0	0	0	0	0	0	0	0	0	ENSP00000410276-D79_GRUNN,ENSP00000402562-D32_GRUNN,ENSP00000393158-D2_GRUNN
NA	NA	0	0	0	0	5	0	0	0	0	0	0	0	1	0	0	0	ENSP00000419154-D9_GRUNN,ENSECAT00000014809_HORSE,ENSP00000412033-D4_GRUNN,ENSP00000419154-D3_GRUNN,ENSP00000398917-D5_GRUNN,ENSP00000398917-D2_GRUNN
NA	NA	0	0	0	0	9	0	0	0	0	0	0	0	0	0	0	0	ENSP00000402211-D29_GRUNN,ENSP00000402211-D11_GRUNN,ENSP00000402211-D48_GRUNN,ENSP00000402211-D39_GRUNN,ENSP00000402211-D20_GRUNN,ENSP00000402211-D3_GRUNN,ENSP00000402211-D16_GRUNN,ENSP00000402211-D10_GRUNN,ENSP00000402211-D32_GRUNN
NA	NA	0	0	0	0	3	0	0	0	0	0	0	0	0	0	0	0	yakA22750_GRUNN,yakG001024_GRUNN,yakA01168_GRUNN

## Sheet: Cattle_expansions
Cattle gene expansions
symbol	GO annotation	Pantholops hodgsonii	Ovis aries	Capra hircus	Oryx gazella	Bos grunniens	Bos taurus	Elaphurus davidianus	Muntiacus muntjak	Giraffa camelopardalis	Balaenoptera acutorostrata	Sus scrofa	Camelus ferus	Equus caballus	Homo sapiens	Rattus norvegicus	Mus musculus	Gene cluster
DMBT1,CD163,SRCRB4D,SSC5D,FCRL1,CD6,CD5L,CD163L1,RP11-108K14.4	GO:0005044; scavenger receptor activity; Molecular Function.GO:0016020; membrane; Cellular Component.GO:0005089; Rho guanyl-nucleotide exchange factor activity; Molecular Function.GO:0005391; sodium:potassium-exchanging ATPase activity; Molecular Function.GO:0005622; intracellular; Cellular Component.GO:0006754; ATP biosynthetic process; Biological Process.GO:0006813; potassium ion transport; Bio…	9	8	13	16	14	19	13	20	15	8	7	10	9	8	9	9	ENSBTAP00000051263-D17_GRUNN,Muntiacus_muntjak_NA_10001126_MUNTJ,Deer_GLEAN_10010719_DAVID,ENSMUST00000093984_MOUSE,ENSSSCP00000011500_SWINE,Muntiacus_muntjak_NA_10000539_MUNTJ,ENSBTAP00000051937-D55_GRUNN,ENSRNOT00000064975_RATTU,ENSECAT00000020695_HORSE,KB018282.1_cdsid_EPY74110.1_CAMEL,ENSECAT00000010270_HORSE,Giraffe_NA_10000582_GIRAF,Muntiacus_muntjak_NA_10014081_MUNTJ,Oryx_gazella_NA_100030…
OR10T2,OR10J1,OR10W1,OR10J3,OR10R2,OR10Z1,OR10V1,OR10Q1,OR10J5,OR10K1,OR10J4,OR10K2,CD1A,OR10AB1P	GO:0004984; olfactory receptor activity; Molecular Function.GO:0007186; G-protein coupled receptor protein signaling pathway; Biological Process.GO:0016021; integral to membrane; Cellular Component.GO:0006955; immune response; Biological Process.GO:0016020; membrane; Cellular Component.GO:0019882; antigen processing and presentation; Biological Process.GO:0004980; melanocyte-stimulating hormone r…	21	22	22	22	20	23	21	13	12	13	26	23	26	11	16	19	ENSMUST00000051768_MOUSE,Giraffe_OR10T2_10006000_GIRAF,SHEEP_ENSP00000334115-D8_SHEEP,Oryx_gazella_OR10J3_10002867_GAZEL,ENSSSCP00000013995_SWINE,ENSMUST00000072395_MOUSE,ENSBTAP00000050613-D1_GRUNN,Deer_GLEAN_10011958_DAVID,Oryx_gazella_OR10R2_10003368_GAZEL,ENSECAT00000006539_HORSE,Deer_GLEAN_10011954_DAVID,ENSBTAT00000000750_BOVIN,ENSSSCP00000013955_SWINE,ENSBTAP00000052800-D8_GRUNN,SHEEP_ENSP…
OLFR139,OR3A4,OR3A2,OR3A4P,OR3A1,OR5V1,OR3A3	GO:0004984; olfactory receptor activity; Molecular Function.GO:0007186; G-protein coupled receptor protein signaling pathway; Biological Process.GO:0016021; integral to membrane; Cellular Component	4	5	5	4	6	8	5	3	3	1	8	12	8	3	5	7	ENSBTAT00000028625_BOVIN,ENSP00000324534-D6_GRUNN,KB016348.1_cdsid_EPY90109.1_CAMEL,SHEEP_ENSP00000380371_SHEEP,KB016348.1_cdsid_EPY90112.1_CAMEL,BACU010882_WHALE,PHO00006120_CHIRU,ENSECAT00000005800_HORSE,ENSECAT00000005951_HORSE,ENSECAT00000005679_HORSE,Giraffe_Olfr139_10019323_GIRAF,ENSSSCP00000018909_SWINE,ENSECAT00000002587_HORSE,ENSMUST00000059440_MOUSE,ENSRNOT00000048935_RATTU,ENSSSCP00000…
CD1E,CD1D,CD1A,CD1B,CD1C	GO:0006955; immune response; Biological Process.GO:0016020; membrane; Cellular Component.GO:0019882; antigen processing and presentation; Biological Process.NA	7	8	11	8	10	12	4	6	1	2	4	5	11	5	1	2	Oryx_gazella_NA_10000171_GAZEL,goat_GLEAN_10006919_GOATS,ENSECAT00000009056_HORSE,KB016326.1_cdsid_EPY90211.1_CAMEL,ENSBTAT00000038392_BOVIN,ENST00000368168_HUMAN,Deer_GLEAN_10004374_DAVID,Deer_GLEAN_10004375_DAVID,ENSBTAT00000031114_BOVIN,ENSBTAP00000009739-D3_GRUNN,ENSBTAP00000001274-D1_GRUNN,ENSBTAT00000055572_BOVIN,ENSBTAT00000052046_BOVIN,SHEEP_ENSBTAP00000013155_SHEEP,ENSBTAP00000033858-D2_…
ZNF133,ZNF169,HKR1,PRDM9,ZNF337,ZNF343	GO:0003676; nucleic acid binding; Molecular Function.GO:0005622; intracellular; Cellular Component.GO:0006355; regulation of transcription, DNA-dependent; Biological Process.GO:0008270; zinc ion binding; Molecular Function.GO:0005634; nucleus; Cellular Component	3	4	3	3	2	4	6	8	3	3	4	0	4	6	3	1	ENSECAT00000011525_HORSE,Muntiacus_muntjak_PRDM9_10021263_MUNTJ,ENSSSCP00000008633_SWINE,SHEEP_ENSBTAP00000006604_SHEEP,ENSBTAT00000002795_BOVIN,ENST00000542144_HUMAN,ENST00000396026_HUMAN,Giraffe_ZNF133_10012169_GIRAF,ENSRNOT00000066370_RATTU,ENST00000252979_HUMAN,Muntiacus_muntjak_PRDM9_10001264_MUNTJ,ENSBTAT00000056084_BOVIN,Muntiacus_muntjak_PRDM9_10019402_MUNTJ,ENSSSCP00000008634_SWINE,Oryx_…
ZSCAN21,ZKSCAN4,ZSCAN23,ZKSCAN1,ZSCAN30,ZNF187,ZNF397,ZNF323,ZNF3,ZNF192,ZSCAN12,ZNF193,ZNF24,ZNF396,ZSCAN16,ZKSCAN3,ZNF232,ZNF165	GO:0005622; intracellular; Cellular Component.GO:0008270; zinc ion binding; Molecular Function.GO:0003676; nucleic acid binding; Molecular Function.GO:0006355; regulation of transcription, DNA-dependent; Biological Process.GO:0003677; DNA binding; Molecular Function.GO:0005634; nucleus; Cellular Component	11	11	8	6	8	13	12	9	10	14	16	4	19	14	9	10	ENSBTAT00000022287_BOVIN,ENSBTAT00000065887_BOVIN,ENST00000531979_HUMAN,ENSSSCP00000001275_SWINE,SHEEP_ENSBTAP00000029042_SHEEP,ENSECAT00000017867_HORSE,GOAT_ENSBTAP00000013542-D2_GOATS,ENSMUST00000070583_MOUSE,SHEEP_ENSBTAP00000013542_SHEEP,ENSECAT00000024438_HORSE,BACU012098_WHALE,PHO00006159_CHIRU,ENSSSCP00000008164_SWINE,ENSMUST00000066497_MOUSE,ENSBTAT00000011774_BOVIN,GOAT_ENSP00000292450_G…
ZNF239,ZFP112,ZNF214,ZNF664,ZNF235,ZNF230,ZNF285,ZNF284,ZNF225,ZNF45,ZNF223,ZNF221,ZNF227,ZNF155,ZNF222,ZNF229,ZNF224	GO:0005622; intracellular; Cellular Component.GO:0008270; zinc ion binding; Molecular Function.GO:0003676; nucleic acid binding; Molecular Function.GO:0006355; regulation of transcription, DNA-dependent; Biological Process	5	7	8	4	5	7	5	4	3	6	7	0	11	15	8	10	ENST00000429154_HUMAN,Deer_GLEAN_10004718_DAVID,ENST00000253426_HUMAN,ENSRNOT00000001338_RATTU,PHO00006953_CHIRU,ENST00000538932_HUMAN,ENSMUST00000072713_MOUSE,ENSSSCP00000025553_SWINE,GOAT_ENSBTAP00000031728_GOATS,ENSRNOT00000051473_RATTU,ENSECAT00000025407_HORSE,Giraffe_ZNF239_10004030_GIRAF,Oryx_gazella_ZNF214_10009908_GAZEL,ENSSSCP00000010427_SWINE,ENSBTAT00000027039_BOVIN,ENST00000421176_HUM…
ZNF41,ZFP27,ZNF182,ZNF84,ZNF300,ZNF674,ZNF12,ZNF248,RBAK,ZFP1,ZNF175,ZNF33B,ZNF605,ZNF81,ZNF350,ZNF613,ZNF432,ZNF484,ZNF614,ZFP37,ZNF649,ZNF334,ZNF382,ZNF567,ZNF585A,ZNF615,ZNF585B,ZNF793,ZNF26,ZNF510,ZNF487P,ZNF658	GO:0003676; nucleic acid binding; Molecular Function.GO:0005622; intracellular; Cellular Component.GO:0006355; regulation of transcription, DNA-dependent; Biological Process.GO:0008270; zinc ion binding; Molecular Function	21	18	18	13	24	28	11	17	10	31	31	0	29	25	19	21	Muntiacus_muntjak_ZNF350_10008062_MUNTJ,ENSECAT00000021698_HORSE,ENSP00000316933-D95_GRUNN,ENSMUST00000161458_MOUSE,ENSSSCP00000013072_SWINE,ENSP00000363344-D1_GRUNN,ENSECAT00000016690_HORSE,ENSSSCP00000011916_SWINE,ENSBTAT00000054072_BOVIN,Giraffe_ZNF41_10006159_GIRAF,ENSSSCP00000005871_SWINE,ENSRNOT00000034545_RATTU,PHO00009283_CHIRU,Oryx_gazella_ZNF84_10004915_GAZEL,PHO00019728_CHIRU,Giraffe_Z…
ZSCAN5B,ZSCAN5C,ZSCAN5A	GO:0005622; intracellular; Cellular Component.GO:0008270; zinc ion binding; Molecular Function	0	1	1	2	3	8	2	1	2	1	2	1	1	3	1	1	Giraffe_ZSCAN5B_10007272_GIRAF,ENST00000534327_HUMAN,ENST00000358992_HUMAN,BACU005984_WHALE,ENSBTAT00000015461_BOVIN,ENSRNOT00000035149_RATTU,Oryx_gazella_ZSCAN5B_10015094_GAZEL,ENSSSCP00000003601_SWINE,ENST00000254165_HUMAN,Deer_GLEAN_10002413_DAVID,ENSBTAT00000052986_BOVIN,ENSBTAT00000056913_BOVIN,ENSBTAT00000000920_BOVIN,Deer_GLEAN_10002414_DAVID,ENSSSCP00000003600_SWINE,ENSBTAP00000000920-D1_…
ZNF215,ZNF483	NA	1	2	2	0	0	3	0	0	0	0	2	8	2	2	0	0	KB016353.1_cdsid_EPY90089.1_CAMEL,KB017350.1_cdsid_EPY78069.1_CAMEL,KB016675.1_cdsid_EQB77533.1_CAMEL,GOAT_ENSP00000393202_GOATS,ENSECAT00000003298_HORSE,ENST00000529903_HUMAN,ENSSSCP00000013488_SWINE,ENSBTAT00000063972_BOVIN,ENST00000358151_HUMAN,PHO00008207_CHIRU,ENSBTAT00000054004_BOVIN,ENSBTAT00000004746_BOVIN,KB016688.1_cdsid_EPY85110.1_CAMEL,ENSECAT00000006389_HORSE,KB016353.1_cdsid_EPY9008…
NA	NA	0	0	2	0	0	2	0	0	0	1	0	0	1	0	1	0	GOAT_ENSP00000337473_GOATS,BACU005980_WHALE,ENSBTAT00000052235_BOVIN,GOAT_ENSBTAP00000042161-D28_GOATS,ENSRNOT00000059379_RATTU,ENSECAT00000017764_HORSE,ENSBTAT00000022341_BOVIN
ZNF66P,ZNF727,ZNF479,ZNF267,ZNF534,ZNF480,ZNF726,ZNF738,ZNF695,ZNF721,ZNF90,ZNF141,ZNF780A,ZNF195,ZNF595,ZNF670	GO:0003676; nucleic acid binding; Molecular Function.GO:0005622; intracellular; Cellular Component.GO:0006355; regulation of transcription, DNA-dependent; Biological Process.NA	1	0	2	0	2	5	0	10	1	0	2	0	1	12	0	6	ENSMUST00000074813_MOUSE,ENST00000301085_HUMAN,Muntiacus_muntjak_ZNF727_10000863_MUNTJ,ENSBTAP00000024349-D34_GRUNN,ENST00000354515_HUMAN,ENST00000334589_HUMAN,Muntiacus_muntjak_ZNF727_10000116_MUNTJ,ENST00000380870_HUMAN,PHO00009136_CHIRU,goat_GLEAN_10001045_GOATS,Muntiacus_muntjak_ZNF727_10000215_MUNTJ,ENST00000487338_HUMAN,Giraffe_ZNF66P_10003876_GIRAF,ENSMUST00000060609_MOUSE,Muntiacus_muntja…
GPR21,GPR52	GO:0007186; G-protein coupled receptor protein signaling pathway; Biological Process.GO:0016021; integral to membrane; Cellular Component	2	0	0	1	0	2	1	1	2	0	2	1	0	2	2	1	ENSBTAT00000055657_BOVIN,ENSSSCP00000016437_SWINE,Deer_GLEAN_10012904_DAVID,PHO00007940_CHIRU,Muntiacus_muntjak_GPR52_10011342_MUNTJ,ENSSSCP00000005975_SWINE,KB016345.1_cdsid_EPY90134.1_CAMEL,PHO00011249_CHIRU,ENSRNOT00000003659_RATTU,Giraffe_GPR21_10006113_GIRAF,ENSMUST00000065441_MOUSE,ENSBTAT00000053314_BOVIN,ENST00000367685_HUMAN,Giraffe_GPR52_10011302_GIRAF,ENST00000373642_HUMAN,ENSRNOT00000…
TAAR4,TAAR8,TAAR6,TAAR7A,TAAR5,TAAR2,TAAR1	GO:0007186; G-protein coupled receptor protein signaling pathway; Biological Process.GO:0016021; integral to membrane; Cellular Component	11	10	11	7	12	18	10	6	3	0	9	9	11	5	16	15	ENSECAT00000006100_HORSE,Deer_GLEAN_10001618_DAVID,SHEEP_ENSP00000275198-D8_SHEEP,ENSSSCP00000004520_SWINE,GOAT_ENSP00000424607-D6_GOATS,ENSMUST00000041180_MOUSE,SHEEP_ENSP00000275198-D9_SHEEP,ENSECAT00000005701_HORSE,ENSP00000275198-D9_GRUNN,ENSSSCP00000004522_SWINE,ENST00000258034_HUMAN,ENSMUST00000079134_MOUSE,Giraffe_Taar4_10016547_GIRAF,ENSRNOT00000051416_RATTU,ENSMUST00000057080_MOUSE,Deer_…
TSPYL1,TSPYL6,TSPYL5,SET,TSPYL4,TSPY10,TSPY4,TSPY8,TSPY2,TSPY1,TSPY3	GO:0005634; nucleus; Cellular Component.GO:0006334; nucleosome assembly; Biological Process	12	4	5	9	13	21	7	9	5	9	4	5	5	11	9	5	Muntiacus_muntjak_TSPYL4_10023547_MUNTJ,ENSBTAT00000047761_BOVIN,ENSBTAT00000002595_BOVIN,Giraffe_TSPYL1_10020600_GIRAF,ENSRNOT00000005239_RATTU,ENSBTAT00000056995_BOVIN,ENSBTAP00000044937-D5_GRUNN,ENSP00000408943-D4_GRUNN,BACU000085_WHALE,ENST00000368608_HUMAN,GOAT_ENSBTAP00000015371_GOATS,ENSBTAT00000012028_BOVIN,ENSBTAT00000048029_BOVIN,Oryx_gazella_TSPYL5_10021235_GAZEL,PHO00001595_CHIRU,ENSB…
TNFRSF10A,TNFRSF10C,TNFRSF10B,TNFRSF10D	GO:0004872; receptor activity; Molecular Function.NA.GO:0045569; TRAIL binding; Molecular Function	0	0	1	0	1	3	0	1	1	2	5	1	1	4	1	1	KB016682.1_cdsid_EPY85176.1_CAMEL,ENSP00000349324-D2_GRUNN,ENSSSCP00000010288_SWINE,GOAT_ENSBTAP00000044731_GOATS,BACU020215_WHALE,ENSECAT00000026397_HORSE,ENSBTAT00000064909_BOVIN,ENSSSCP00000019309_SWINE,ENSSSCP00000010289_SWINE,ENST00000221132_HUMAN,ENST00000544885_HUMAN,ENSMUST00000022663_MOUSE,ENSBTAT00000045246_BOVIN,ENSRNOT00000058650_RATTU,Muntiacus_muntjak_TNFRSF10A_10014622_MUNTJ,ENSSSC…
LAIR2,LAIR1	NA	1	0	2	1	2	5	0	1	1	2	3	2	1	2	1	1	ENSSSCP00000003549_SWINE,BACU009033_WHALE,ENSSSCP00000022877_SWINE,ENSP00000343366-D19_GRUNN,PHO00004490_CHIRU,BACU009065_WHALE,ENSBTAP00000036831-D1_GRUNN,ENSECAT00000010616_HORSE,ENSBTAT00000054607_BOVIN,GOAT_ENSBTAP00000005286_GOATS,ENSSSCP00000003552_SWINE,Muntiacus_muntjak_LAIR2_10003631_MUNTJ,ENSBTAT00000036984_BOVIN,ENSBTAT00000054752_BOVIN,ENSBTAT00000054507_BOVIN,ENST00000301202_HUMAN,go…
LILRB4,LILRA2,LILRB5,LILRA6,NCR1,GP6,KIR3DL1,LILRB3,FCAR,LILRA5,KIR2DL4,KIR2DL1,LILRB1,LILRA3,KIR3DX1,KIR3DL3,KIR3DL2,LILRA1,KIR2DL3,LILRA4,LILRB2	NA	10	10	12	21	16	30	7	13	10	3	20	7	16	21	10	12	GOAT_ENSP00000394922_GOATS,Muntiacus_muntjak_LILRA5_10009671_MUNTJ,GOAT_ENSBTAP00000028085_GOATS,ENSBTAP00000047561-D5_GRUNN,Deer_GLEAN_10000376_DAVID,Deer_GLEAN_10001778_DAVID,ENSBTAT00000005286_BOVIN,ENSECAT00000012350_HORSE,ENSMUST00000006792_MOUSE,ENSRNOT00000064104_RATTU,KB017477.1_cdsid_EPY77351.1_CAMEL,ENSSSCP00000021796_SWINE,Giraffe_LILRB4_10000186_GIRAF,PHO00004493_CHIRU,ENST00000291633…
NA	NA	0	2	2	0	1	2	0	0	0	1	1	1	0	0	2	19	ENSMUST00000115931_MOUSE,ENSMUST00000111361_MOUSE,ENSMUST00000111366_MOUSE,ENSMUST00000069485_MOUSE,KB016930.1_cdsid_EPY82328.1_CAMEL,ENSMUST00000111422_MOUSE,ENSMUST00000093503_MOUSE,ENSMUST00000066427_MOUSE,SHEEP_ENSBTAP00000047932_SHEEP,GOAT_ENSBTAP00000047932_GOATS,ENSRNOT00000029635_RATTU,ENSSSCP00000017227_SWINE,ENSMUST00000165967_MOUSE,ENSMUST00000161724_MOUSE,ENSMUST00000161267_MOUSE,ENSM…
NA	NA	0	2	2	0	0	2	1	0	0	0	2	0	2	0	0	0	ENSSSCP00000017229_SWINE,SHEEP_ENSBTAP00000012736_SHEEP,ENSBTAT00000064013_BOVIN,SHEEP_ENSBTAP00000013219_SHEEP,GOAT_ENSBTAP00000012736_GOATS,ENSECAT00000020122_HORSE,ENSECAT00000015292_HORSE,GOAT_ENSBTAP00000013219_GOATS,ENSBTAT00000012736_BOVIN,Deer_GLEAN_10000599_DAVID,ENSSSCP00000017502_SWINE
ANKRD26,ANKRD18B,ANKRD30B,ANKRD62,ANKRD20A3,ANKRD20A4,ANKRD20A2,CCDC144A,AC073995.2,ANKRD36,ANKRD30A,CCDC144C,ANKRD20A1,ANKRD18A	NA.GO:0005515; protein binding; Molecular Function	2	0	2	3	1	4	2	2	3	1	4	1	1	14	1	1	ENST00000290943_HUMAN,ENST00000358984_HUMAN,Oryx_gazella_ANKRD26_10022296_GAZEL,ENST00000314074_HUMAN,ENSSSCP00000007461_SWINE,ENSSSCP00000007500_SWINE,ENSRNOT00000056301_RATTU,ENST00000254835_HUMAN,ENSBTAT00000029934_BOVIN,ENST00000357336_HUMAN,Muntiacus_muntjak_ANKRD26_10009466_MUNTJ,BACU001746_WHALE,ENST00000377601_HUMAN,ENSBTAT00000052786_BOVIN,ENSECAT00000021082_HORSE,ENSSSCP00000007460_SWIN…
COL23A1,COL25A1,COL13A1	NA	3	4	4	0	0	3	0	0	0	2	3	0	3	3	2	3	ENSMUST00000106353_MOUSE,SHEEP_ENSBTAP00000044911_SHEEP,ENSBTAT00000039811_BOVIN,ENSECAT00000008711_HORSE,ENSBTAT00000017548_BOVIN,ENSSSCP00000013369_SWINE,GOAT_ENSBTAP00000044911_GOATS,ENST00000390654_HUMAN,ENST00000399132_HUMAN,SHEEP_ENSBTAP00000017548_SHEEP,PHO00012458_CHIRU,ENSECAT00000019794_HORSE,ENST00000398972_HUMAN,SHEEP_ENSBTAP00000015641_SHEEP,BACU002893_WHALE,BACU001939_WHALE,ENSMUST0…
COL5A2,COL1A2,COL3A1,COL2A1,COL1A1	GO:0005201; extracellular matrix structural constituent; Molecular Function.GO:0005581; collagen; Cellular Component.GO:0005515; protein binding; Molecular Function	5	5	5	1	4	5	4	2	1	5	5	1	5	5	5	5	ENSMUST00000086430_MOUSE,Deer_GLEAN_10006739_DAVID,PHO00003614_CHIRU,GOAT_ENSBTAP00000017420_GOATS,ENSMUST00000001547_MOUSE,ENSRNOT00000029673_RATTU,ENST00000317840_HUMAN,BACU017034_WHALE,ENSSSCP00000019885_SWINE,SHEEP_ENSP00000304408_SHEEP,ENSRNOT00000016423_RATTU,ENSSSCP00000016253_SWINE,ENST00000380518_HUMAN,ENSSSCP00000016989_SWINE,PHO00018974_CHIRU,BACU017033_WHALE,PHO00013841_CHIRU,ENSRNOT0…
MAGEA13P,MAGEB1,MAGEB3,MAGEB4,MAGEB16,MAGEB10,MAGEA10,MAGEB18,MAGEE2,NDNL2,NDN,RPS3A,MAGEF1,MAGEA1,MAGEB5,MAGEB6,MAGEA12,MAGEE1,MAGEB17,MAGEA6,MAGEA2,MAGEA9,MAGEA8,MAGEC2,MAGEA3,MAGEA2B,MAGEA11,MAGEA9B,MAGEB2,MAGEA4	GO:0003723; RNA binding; Molecular Function.GO:0003735; structural constituent of ribosome; Molecular Function.GO:0005622; intracellular; Cellular Component.GO:0005840; ribosome; Cellular Component.GO:0006412; translation; Biological Process.NA	26	20	27	22	35	41	33	24	28	18	16	17	18	28	27	28	BACU011786_WHALE,PHO00014407_CHIRU,ENSP00000404328-D7_GRUNN,ENST00000356790_HUMAN,GOAT_ENSP00000368315-D3_GOATS,ENSSSCP00000012975_SWINE,Oryx_gazella_NDNL2_10018154_GAZEL,Muntiacus_muntjak_MAGEA10_10008324_MUNTJ,GOAT_ENSP00000244096_GOATS,Deer_GLEAN_10003037_DAVID,goat_GLEAN_10012532_GOATS,PHO00015292_CHIRU,BACU007906_WHALE,PHO00011862_CHIRU,ENSRNOT00000065450_RATTU,SHEEP_ENSP00000404328-D2_SHEEP…
HSFY1,MAGEA9,MAGEA10	GO:0003700; transcription factor activity; Molecular Function.GO:0005634; nucleus; Cellular Component.GO:0006355; regulation of transcription, DNA-dependent; Biological Process.GO:0043565; sequence-specific DNA binding; Molecular Function.GO:0003700; sequence-specific DNA binding transcription factor activity; Molecular Function.GO:0006508; proteolysis; Biological Process.GO:0016020; membrane; Ce…	1	4	6	3	4	6	8	10	5	1	1	1	3	0	0	0	Deer_GLEAN_10000347_DAVID,ENSBTAT00000063300_BOVIN,Giraffe_HSFY1_10000273_GIRAF,ENSSSCP00000013537_SWINE,BACU007782_WHALE,ENSBTAT00000048791_BOVIN,Oryx_gazella_HSFY1_10000972_GAZEL,ENSBTAT00000050846_BOVIN,Deer_GLEAN_10000595_DAVID,Oryx_gazella_HSFY1_10008573_GAZEL,Deer_GLEAN_10007754_DAVID,Deer_GLEAN_10001112_DAVID,Giraffe_HSFY1_10000197_GIRAF,Muntiacus_muntjak_NA_10000223_MUNTJ,GOAT_ENSBTAP0000…
HSFY1,HSFX1,HSFY2,HSFX2	NA	0	0	0	0	3	5	4	0	1	0	1	0	2	4	1	1	Giraffe_HSFY1_10000188_GIRAF,ENST00000309834_HUMAN,Deer_GLEAN_10000284_DAVID,ENST00000370416_HUMAN,ENSSSCP00000013539_SWINE,ENST00000344884_HUMAN,ENSP00000410851-D3_GRUNN,ENSMUST00000062085_MOUSE,ENSRNOT00000058831_RATTU,ENSP00000306472-D2_GRUNN,Deer_GLEAN_10000476_DAVID,Deer_GLEAN_10000626_DAVID,ENSBTAT00000066080_BOVIN,ENSBTAT00000053282_BOVIN,ENSECAT00000009196_HORSE,ENST00000524178_HUMAN,ENSE…
THOC7	NA	1	1	1	0	1	2	0	2	0	7	1	0	1	1	1	1	ENSRNOT00000010675_RATTU,GOAT_ENSBTAP00000043944_GOATS,ENSBTAT00000046670_BOVIN,ENST00000295899_HUMAN,PHO00012728_CHIRU,SHEEP_ENSBTAP00000043944_SHEEP,BACU015099_WHALE,ENSBTAP00000043944-D1_GRUNN,ENSBTAT00000012008_BOVIN,ENSMUST00000065865_MOUSE,BACU020103_WHALE,ENSSSCP00000012245_SWINE,Muntiacus_muntjak_THOC7_10021090_MUNTJ,Muntiacus_muntjak_THOC7_10022499_MUNTJ,BACU020105_WHALE,BACU013800_WHALE…
MORF4L2,MORF4L1	GO:0005634; nucleus; Cellular Component.GO:0000785; chromatin; Cellular Component.GO:0003682; chromatin binding; Molecular Function.GO:0006333; chromatin assembly or disassembly; Biological Process.GO:0003824; catalytic activity; Molecular Function.GO:0008270; zinc ion binding; Molecular Function.GO:0016787; hydrolase activity; Molecular Function	2	2	2	3	3	5	1	6	2	4	2	2	2	2	5	2	Muntiacus_muntjak_Morf4l1_10020042_MUNTJ,Giraffe_MORF4L2_10000672_GIRAF,ENSRNOT00000029547_RATTU,BACU001813_WHALE,Oryx_gazella_Morf4l1_10000626_GAZEL,ENSBTAT00000001731_BOVIN,ENSBTAT00000014581_BOVIN,ENSP00000331310-D1_GRUNN,BACU011197_WHALE,KB018478.1_cdsid_EPY73709.1_CAMEL,SHEEP_ENSP00000416120_SHEEP,ENSRNOT00000019365_RATTU,Muntiacus_muntjak_MORF4L2_10006608_MUNTJ,ENSBTAT00000036586_BOVIN,Deer…
KRTAP2-4,KRTAP2-2,KRTAP2-1,KRTAP2-3	NA.GO:0045095; keratin filament; Cellular Component	3	2	0	3	3	4	2	0	0	1	4	0	4	4	4	4	SHEEP_ENSBTAP00000050457-D16_SHEEP,ENSBTAT00000065867_BOVIN,Oryx_gazella_NA_10000795_GAZEL,ENSECAT00000002107_HORSE,ENSBTAT00000056985_BOVIN,ENSBTAP00000050021-D2_GRUNN,ENSECAT00000002315_HORSE,ENSSSCP00000018496_SWINE,ENSMUST00000074926_MOUSE,Oryx_gazella_NA_10000797_GAZEL,ENSP00000375076-D25_GRUNN,SHEEP_ENSBTAP00000048090-D2_SHEEP,ENSRNOT00000046319_RATTU,ENST00000394015_HUMAN,ENSMUST0000007230…
GMCL1	GO:0005515; protein binding; Molecular Function.GO:0005634; nucleus; Cellular Component.GO:0030528; transcription regulator activity; Molecular Function.GO:0045449; regulation of transcription; Biological Process	2	1	2	2	2	3	3	2	3	2	2	3	1	1	4	22	ENSBTAP00000047795-D1_GRUNN,Giraffe_Gmcl1_10006146_GIRAF,ENSMUST00000105123_MOUSE,ENSRNOT00000048887_RATTU,ENSMUST00000105117_MOUSE,ENSMUST00000105116_MOUSE,ENSMUST00000105014_MOUSE,ENSRNOT00000041559_RATTU,ENSMUST00000105129_MOUSE,GOAT_ENSBTAP00000047795_GOATS,ENSRNOT00000045297_RATTU,ENSMUST00000105118_MOUSE,Oryx_gazella_GMCL1_10018715_GAZEL,ENSMUST00000145286_MOUSE,KB017956.1_cdsid_EPY74871.1_…
TRBV20OR9-2	NA	1	2	1	0	0	3	1	0	0	1	1	1	6	1	0	0	SHEEP_ENSBTAP00000048447-D21_SHEEP,ENSECAT00000013940_HORSE,BACU010957_WHALE,GOAT_ENSP00000374917_GOATS,ENSBTAT00000038869_BOVIN,ENSECAT00000004228_HORSE,ENST00000379435_HUMAN,Deer_GLEAN_10001949_DAVID,ENSECAT00000014914_HORSE,ENSECAT00000014968_HORSE,ENSSSCP00000017463_SWINE,ENSBTAT00000064277_BOVIN,ENSECAT00000014349_HORSE,SHEEP_ENSP00000374917_SHEEP,KB017062.1_cdsid_EPY80726.1_CAMEL,ENSECAT000…
TRGC1,TRGC2	NA	5	3	4	3	4	5	2	5	1	1	3	2	6	2	2	4	ENSSSCP00000022802_SWINE,ENSECAT00000023035_HORSE,ENSMUST00000103561_MOUSE,ENSBTAP00000050899-D2_GRUNN,ENSBTAT00000052995_BOVIN,ENSBTAT00000036195_BOVIN,KB017061.1_cdsid_EPY80790.1_CAMEL,PHO00013959_CHIRU,Deer_GLEAN_10005451_DAVID,Oryx_gazella_TRGC1_10012396_GAZEL,GOAT_ENSBTAP00000013603_GOATS,goat_GLEAN_10012257_GOATS,Oryx_gazella_NA_10007729_GAZEL,ENSBTAP00000047136-D1_GRUNN,ENSBTAT00000056695_…
LYZL4,LYZ3,LYZL1,LALBA,SPACA5,SPACA3,LYS,LYZ2,LYZ1,LYZL6,SPACA5B,LYZ,LYZL2	GO:0004461; lactose synthase activity; Molecular Function.GO:0005509; calcium ion binding; Molecular Function.GO:0005989; lactose biosynthetic process; Biological Process.GO:0003796; lysozyme activity; Molecular Function.GO:0016998; cell wall macromolecule catabolic process; Biological Process	11	14	13	9	14	17	9	7	9	5	7	6	8	9	8	9	ENSMUST00000020392_MOUSE,PHO00005449_CHIRU,GOAT_ENSBTAP00000007924-D6_GOATS,ENST00000394638_HUMAN,GOAT_ENSP00000364650_GOATS,SHEEP_ENSBTAP00000052620_SHEEP,ENSECAT00000023749_HORSE,Oryx_gazella_NA_10005885_GAZEL,PHO00003435_CHIRU,ENSECAT00000010572_HORSE,ENST00000301046_HUMAN,ENSMUST00000025076_MOUSE,ENSMUST00000065468_MOUSE,PHO00012287_CHIRU,ENSBTAP00000048332-D6_GRUNN,GOAT_ENSP00000392807_GOATS…
SETMAR	NA	37	6	8	0	43	52	0	0	0	1	0	0	0	1	0	0	PHO00011326_CHIRU,ENSBTAP00000053094-D86_GRUNN,PHO00008438_CHIRU,PHO00005610_CHIRU,ENSBTAP00000005410-D46_GRUNN,PHO00017503_CHIRU,ENSBTAT00000063661_BOVIN,ENSBTAT00000009396_BOVIN,PHO00010248_CHIRU,ENSBTAP00000009043-D64_GRUNN,ENSBTAP00000011250-D1_GRUNN,ENSBTAT00000063587_BOVIN,ENSBTAP00000033501-D1_GRUNN,ENSBTAP00000020978-D18_GRUNN,ENSBTAT00000037486_BOVIN,ENSBTAP00000051330-D49_GRUNN,PHO00013…
PAG2,PGA,PAG,PAG1,CYM,REN,PGC,CTSD,PGA3,PGA5,PGA4,CTSE	GO:0004190; aspartic-type endopeptidase activity; Molecular Function.GO:0006508; proteolysis; Biological Process.GO:0009607; response to biotic stimulus; Biological Process.GO:0016021; integral to membrane; Cellular Component	17	39	40	22	52	56	41	29	19	7	15	7	12	7	7	7	GOAT_ENSBTAP00000030228-D19_GOATS,ENSSSCP00000013931_SWINE,ENSSSCP00000013924_SWINE,GOAT_ENSBTAP00000030448-D33_GOATS,ENSBTAP00000030173-D15_GRUNN,ENST00000325558_HUMAN,SHEEP_ENSBTAP00000030228_SHEEP,Giraffe_PAG2_10000171_GIRAF,SHEEP_ENSBTAP00000030448-D8_SHEEP,Deer_GLEAN_10000310_DAVID,Deer_GLEAN_10000150_DAVID,ENSSSCP00000023039_SWINE,ENSSSCP00000013930_SWINE,Muntiacus_muntjak_PGC_10006737_MUNT…
TCEB2	NA.GO:0005515; protein binding; Molecular Function	1	2	3	1	3	4	2	1	4	2	1	6	0	1	9	2	ENSRNOT00000010249_RATTU,BACU020329_WHALE,Giraffe_Tceb2_10005502_GIRAF,goat_GLEAN_10015474_GOATS,Giraffe_Tceb2_10020356_GIRAF,ENSMUST00000069579_MOUSE,ENSSSCP00000008610_SWINE,KB018419.1_cdsid_EPY73865.1_CAMEL,ENSRNOT00000058263_RATTU,Oryx_gazella_TCEB2_10002577_GAZEL,ENSRNOT00000040365_RATTU,ENSBTAP00000048590-D2_GRUNN,Deer_GLEAN_10014819_DAVID,KB017026.1_cdsid_EPY81038.1_CAMEL,ENSRNOT0000004056…
ITLN2,ITLN1	GO:0005102; receptor binding; Molecular Function.GO:0007165; signal transduction; Biological Process	2	0	3	4	3	4	2	2	2	0	2	0	2	2	1	2	ENSBTAP00000013594-D1_GRUNN,ENSRNOT00000006196_RATTU,ENSBTAT00000001750_BOVIN,ENSBTAP00000001750-D2_GRUNN,Giraffe_ITLN2_10001788_GIRAF,Oryx_gazella_Itln1_10003656_GAZEL,GOAT_ENSBTAP00000039833_GOATS,ENSBTAT00000057150_BOVIN,Oryx_gazella_Itln1_10003657_GAZEL,ENSSSCP00000006793_SWINE,Deer_GLEAN_10011919_DAVID,GOAT_ENSBTAP00000013594_GOATS,ENSECAT00000001224_HORSE,PHO00004536_CHIRU,Giraffe_ITLN2_100…
UBE2F,UBE2L6,UBE2E3,UBE2G2,UBE2I,UBE2G1,UBE2K,UBE2T,UBE2N,UBE2A,UBE2C,UBE2B,UBE2H,UBE2E1,UBE2L3,CDC34,UBE2M,UBE2R2,UBE2W,UBE2D4,UBE2S,UBE2D2,UBE2NL,UBE2D1,UBE2E2,UBE2D3	GO:0019787; small conjugating protein ligase activity; Molecular Function.GO:0043687; post-translational protein modification; Biological Process.GO:0051246; regulation of protein metabolic process; Biological Process.GO:0004842; ubiquitin-protein ligase activity; Molecular Function.GO:0005524; ATP binding; Molecular Function.GO:0016567; protein ubiquitination; Biological Process.GO:0006464; prot…	25	25	27	22	29	37	16	19	19	26	23	11	25	26	31	33	ENSBTAP00000005220-D1_GRUNN,Giraffe_UBE2F_10005362_GIRAF,sheep_GLEAN_10017357_SHEEP,ENSRNOT00000046159_RATTU,ENSRNOT00000040086_RATTU,ENSECAT00000015457_HORSE,Deer_GLEAN_10015855_DAVID,ENST00000287156_HUMAN,ENSBTAT00000008394_BOVIN,PHO00019804_CHIRU,ENSRNOT00000045603_RATTU,SHEEP_ENSP00000316176_SHEEP,Deer_GLEAN_10015420_DAVID,BACU011380_WHALE,KB017245.1_cdsid_EPY78772.1_CAMEL,ENSECAT00000020216_…
PLA2G2F,PLA2G2A,PLA2G5,PLA2G2E,PLA2G10,PLA2G2D,PLA2G2C,PLA2G1B	GO:0004623; phospholipase A2 activity; Molecular Function.GO:0005509; calcium ion binding; Molecular Function.GO:0016042; lipid catabolic process; Biological Process	10	9	10	4	10	12	7	10	8	6	5	6	9	8	7	7	Deer_GLEAN_10019917_DAVID,ENSECAT00000009449_HORSE,Oryx_gazella_PLA2G2C_10016010_GAZEL,ENSSSCP00000028002_SWINE,ENSSSCP00000003799_SWINE,BACU018669_WHALE,KB017313.1_cdsid_EQB78643.1_CAMEL,GOAT_ENSBTAP00000017333_GOATS,BACU005723_WHALE,ENSRNOT00000022716_RATTU,Giraffe_PLA2G2F_10008512_GIRAF,Deer_GLEAN_10019916_DAVID,ENSBTAP00000033562-D1_GRUNN,PHO00005428_CHIRU,ENST00000375102_HUMAN,PHO00005407_CH…
NBPF4,NBPF15,NBPF24,NBPF9,NBPF3,NBPF6,NBPF11,NBPF16,NBPF14	NA	2	1	0	0	1	2	2	1	0	1	3	2	0	9	0	0	ENSBTAT00000030871_BOVIN,ENST00000442702_HUMAN,sheep_GLEAN_10001750_SHEEP,ENST00000415641_HUMAN,Muntiacus_muntjak_NBPF4_10001229_MUNTJ,ENST00000369228_HUMAN,PHO00000215_CHIRU,Deer_GLEAN_10006575_DAVID,ENST00000338347_HUMAN,Deer_GLEAN_10000793_DAVID,ENSP00000359055-D1_GRUNN,ENSSSCP00000007156_SWINE,KB016344.1_cdsid_EPY90141.1_CAMEL,KB017596.1_cdsid_EPY76565.1_CAMEL,ENST00000454000_HUMAN,PHO0000951…
ULBP3,ULBP1,RAET1E,RAET1G,ULBP2,RAET1L	GO:0006955; immune response; Biological Process.GO:0016020; membrane; Cellular Component.GO:0019882; antigen processing and presentation; Biological Process.GO:0042612; MHC class I protein complex; Cellular Component	6	7	9	4	10	15	6	7	7	0	5	0	6	6	0	0	Muntiacus_muntjak_ULBP1_10001147_MUNTJ,PHO00008011_CHIRU,ENSBTAP00000046694-D2_GRUNN,GOAT_ENSBTAP00000011321_GOATS,ENSBTAT00000002400_BOVIN,ENSBTAP00000048357-D1_GRUNN,Deer_GLEAN_10001975_DAVID,Deer_GLEAN_10001973_DAVID,Muntiacus_muntjak_ULBP1_10000444_MUNTJ,ENSBTAT00000064751_BOVIN,ENSBTAT00000034023_BOVIN,ENST00000399812_HUMAN,Oryx_gazella_ULBP3_10000432_GAZEL,ENSBTAT00000037567_BOVIN,Deer_GLEA…
PRAMEF24,PRAMEF12,PRAMEF9,PRAME,LRRC14,PRAMEL,PRAMEF7,PRAMEF4,PRAMEF20,WI2-2994D6.2,PRAMEF1,PRAMEF18,PRAMEF2,PRAMEF10,PRAMEF6,PRAMEF11,PRAMEF17,PRAMEF14,PRAMEF22,PRAMEF13,PRAMEF21,PRAMEF8,PRAMEF5,PRAMEF19,PRAMEF16,PRAMEF15,PRAMEF3	GO:0003677; DNA binding; Molecular Function.GO:0005634; nucleus; Cellular Component.GO:0005515; protein binding; Molecular Function.GO:0008152; metabolic process; Biological Process.GO:0008168; methyltransferase activity; Molecular Function.NA	23	21	23	13	20	25	24	20	19	9	7	11	6	25	36	100	ENST00000423177_HUMAN,SHEEP_ENSBTAP00000050906-D3_SHEEP,ENSBTAP00000006879-D1_GRUNN,ENSBTAT00000038910_BOVIN,ENSRNOT00000057697_RATTU,GOAT_ENSBTAP00000001607-D3_GOATS,ENSBTAT00000053689_BOVIN,ENSBTAT00000020712_BOVIN,ENSBTAP00000040134-D1_GRUNN,ENSRNOT00000068306_RATTU,ENSECAT00000010699_HORSE,ENSECAT00000014941_HORSE,ENSMUST00000111572_MOUSE,ENSMUST00000053304_MOUSE,ENST00000332296_HUMAN,Giraffe…
ZNF280C,ZNF280D,ZNF280B,ZNF280A	GO:0005622; intracellular; Cellular Component.GO:0008270; zinc ion binding; Molecular Function	5	4	4	3	4	9	3	3	3	4	3	0	2	4	3	3	Giraffe_ZNF280C_10004746_GIRAF,SHEEP_ENSBTAP00000001332_SHEEP,ENSBTAT00000049902_BOVIN,ENST00000370978_HUMAN,BACU017177_WHALE,ENSBTAT00000047913_BOVIN,PHO00021683_CHIRU,GOAT_ENSP00000360017_GOATS,ENSBTAT00000049218_BOVIN,Oryx_gazella_ZNF280D_10019221_GAZEL,Oryx_gazella_ZNF280B_10000516_GAZEL,ENST00000267807_HUMAN,ENSP00000360017-D2_GRUNN,ENSMUST00000098576_MOUSE,Muntiacus_muntjak_ZNF280B_10013687…
CXORF69,Z83826.1	NA	1	0	2	2	1	3	2	3	2	2	2	1	0	1	1	3	BACU000206_WHALE,ENSSSCP00000013490_SWINE,goat_GLEAN_10004808_GOATS,GOAT_ENSP00000328335_GOATS,ENSBTAT00000050760_BOVIN,ENSBTAT00000026044_BOVIN,ENSMUST00000119488_MOUSE,Oryx_gazella_CXorf69_10003209_GAZEL,Giraffe_NA_10011286_GIRAF,Deer_GLEAN_10022427_DAVID,BACU016999_WHALE,ENSBTAT00000063105_BOVIN,ENSMUST00000100864_MOUSE,ENSP00000328335-D1_GRUNN,ENSRNOT00000055732_RATTU,Oryx_gazella_CXorf69_100…
ARHGAP20	NA.GO:0005622; intracellular; Cellular Component.GO:0007165; signal transduction; Biological Process	1	0	0	0	0	4	0	1	0	0	1	1	1	0	3	0	ENSBTAT00000049623_BOVIN,ENSSSCP00000009714_SWINE,KB018834.1_cdsid_EPY73357.1_CAMEL,ENSBTAT00000055944_BOVIN,Muntiacus_muntjak_ARHGAP20_10020164_MUNTJ,ENSRNOT00000068263_RATTU,ENSBTAT00000050250_BOVIN,ENSBTAT00000065430_BOVIN,ENSRNOT00000030752_RATTU,ENSRNOT00000058245_RATTU,ENSECAT00000014449_HORSE,PHO00009516_CHIRU
SOX17,SOX7,SOX18,CTD-2135J3.4	GO:0003677; DNA binding; Molecular Function.GO:0005634; nucleus; Cellular Component.GO:0005515; protein binding; Molecular Function	0	0	0	2	1	3	0	2	2	1	2	0	0	4	3	3	Muntiacus_muntjak_Sox17_10017076_MUNTJ,ENSSSCP00000006669_SWINE,ENST00000340356_HUMAN,ENSMUST00000054491_MOUSE,ENSRNOT00000033116_RATTU,ENSBTAT00000015485_BOVIN,ENSP00000346908-D1_GRUNN,ENSMUST00000027035_MOUSE,ENST00000554914_HUMAN,Oryx_gazella_SOX7_10016215_GAZEL,ENSRNOT00000021790_RATTU,ENSMUST00000079652_MOUSE,Muntiacus_muntjak_SOX7_10019810_MUNTJ,Giraffe_Sox17_10004504_GIRAF,ENSBTAT000000075…
HBE1,HBZ1,HBQ1,HBB,HBM,HBE4,HBA,HBE2,HBB1,HBD,HBZ,HBG1,HBA1,HBG2,HBA2	GO:0005506; iron ion binding; Molecular Function.GO:0020037; heme binding; Molecular Function.GO:0005833; hemoglobin complex; Cellular Component.GO:0015671; oxygen transport; Biological Process.GO:0019825; oxygen binding; Molecular Function	7	9	10	9	8	14	6	11	14	6	6	10	5	10	11	10	Deer_GLEAN_10005882_DAVID,Giraffe_NA_10005687_GIRAF,KB019771.1_cdsid_EPY72749.1_CAMEL,SHEEP_ENSBTAP00000050256_SHEEP,Giraffe_NA_10000055_GIRAF,KB016676.1_cdsid_EPY85331.1_CAMEL,Muntiacus_muntjak_HBE4_10000709_MUNTJ,ENSBTAT00000057323_BOVIN,ENSBTAP00000052532-D1_GRUNN,ENSMUST00000020535_MOUSE,Oryx_gazella_HBA_10009016_GAZEL,PHO00020927_CHIRU,Muntiacus_muntjak_HBE4_10000426_MUNTJ,Oryx_gazella_HBM_1…
SERPINB11,SERPINB6,SERPINB10,SERPINB2,SERPINC1,SERPINH1,SERPINE3,SERPINB3,SERPINB12,SERPINE2,SERPINE1,SERPINB8,SERPINI1,SERPINB14,SERPINB9,SERPINB5,SERPINB1,SERPINB13,SERPINB7,SERPINI2,SERPINB4	GO:0004867; serine-type endopeptidase inhibitor activity; Molecular Function.GO:0005488; binding; Molecular Function.GO:0005515; protein binding; Molecular Function.GO:0016070; RNA metabolic process; Biological Process	17	20	24	24	22	25	27	15	23	15	14	18	25	18	24	35	KB017901.1_cdsid_EPY75126.1_CAMEL,ENSRNOT00000001916_RATTU,ENSBTAT00000001458_BOVIN,SHEEP_ENSBTAP00000005713_SHEEP,Deer_GLEAN_10004491_DAVID,ENSSSCP00000029164_SWINE,ENSECAT00000021563_HORSE,ENSRNOT00000003409_RATTU,ENSRNOT00000013452_RATTU,Muntiacus_muntjak_SERPINB6_10019745_MUNTJ,PHO00011297_CHIRU,PHO00009095_CHIRU,Oryx_gazella_SERPINE1_10022774_GAZEL,ENSBTAP00000007006-D1_GRUNN,SHEEP_ENSBTAP00…
OASL,OAS1,OAS2	NA.GO:0005515; protein binding; Molecular Function.GO:0016779; nucleotidyltransferase activity; Molecular Function	2	4	5	1	2	4	3	2	1	1	3	1	4	3	10	11	ENSSSCP00000010549_SWINE,ENST00000342315_HUMAN,ENSMUST00000053909_MOUSE,ENST00000377508_HUMAN,SHEEP_ENSBTAP00000002019-D2_SHEEP,ENSMUST00000171820_MOUSE,ENSRNOT00000038426_RATTU,goat_GLEAN_10005484_GOATS,ENSBTAT00000019477_BOVIN,ENSRNOT00000001853_RATTU,ENSMUST00000057814_MOUSE,PHO00008689_CHIRU,ENSMUST00000031542_MOUSE,sheep_GLEAN_10007851_SHEEP,ENSMUST00000086377_MOUSE,ENSSSCP00000010587_SWINE,…
CT47A1,CT47B1	NA	0	0	0	0	3	4	0	2	2	0	2	0	0	0	0	0	ENSSSCP00000013399_SWINE,ENSP00000391318-D1_GRUNN,ENSP00000414253-D1_GRUNN,ENSBTAT00000053470_BOVIN,ENSBTAT00000066070_BOVIN,ENSBTAT00000064673_BOVIN,ENSSSCP00000013429_SWINE,ENSBTAT00000065818_BOVIN,ENSBTAP00000048583-D1_GRUNN,Muntiacus_muntjak_CT47B1_10015208_MUNTJ,Muntiacus_muntjak_CT47A1_10014539_MUNTJ,Giraffe_NA_10003490_GIRAF,Giraffe_CT47A1_10001050_GIRAF
CATHL2,PMAP37,CATHL1A,CATHL7,CATHL1,CATHL3,CATHL4,CATHL6,CAMP	GO:0005576; extracellular region; Cellular Component.GO:0006952; defense response; Biological Process	6	7	6	8	8	11	4	10	8	1	4	4	3	1	1	1	Muntiacus_muntjak_CATHL2_10000369_MUNTJ,ENSBTAP00000026747-D1_GRUNN,ENSBTAT00000021503_BOVIN,SHEEP_ENSBTAP00000034497_SHEEP,Deer_GLEAN_10003049_DAVID,ENSBTAT00000026747_BOVIN,GOAT_ENSBTAP00000034497-D2_GOATS,ENSSSCP00000012102_SWINE,Muntiacus_muntjak_CATHL2_10018905_MUNTJ,ENSSSCP00000021393_SWINE,Muntiacus_muntjak_CATHL2_10000184_MUNTJ,ENSBTAP00000003930-D1_GRUNN,ENSBTAT00000011364_BOVIN,Giraffe_…
C2CD4A,C2CD4D,C2CD4C,C2CD4B	NA.GO:0005515; protein binding; Molecular Function	0	0	0	1	1	4	0	1	3	1	4	0	0	4	4	4	ENSRNOT00000043006_RATTU,Giraffe_NA_10007187_GIRAF,ENSMUST00000169433_MOUSE,BACU006556_WHALE,ENSMUST00000059699_MOUSE,ENSSSCP00000021437_SWINE,ENSSSCP00000004931_SWINE,Oryx_gazella_NA_10004537_GAZEL,ENSMUST00000171652_MOUSE,ENST00000454109_HUMAN,Giraffe_C2CD4A_10019523_GIRAF,ENSSSCP00000022673_SWINE,ENSBTAT00000064792_BOVIN,Giraffe_C2CD4A_10019522_GIRAF,Muntiacus_muntjak_NA_10012574_MUNTJ,ENST000…
PRP3,PRL,PRP2,CSH1,CSH,PRP4,PRP1	GO:0005179; hormone activity; Molecular Function.GO:0005576; extracellular region; Cellular Component	9	10	13	11	12	14	19	8	4	1	1	1	1	1	25	26	ENSBTAP00000011706-D9_GRUNN,Giraffe_PRP3_10015857_GIRAF,Oryx_gazella_CSH_10014487_GAZEL,ENSMUST00000006659_MOUSE,ENSRNOT00000023086_RATTU,ENSRNOT00000022447_RATTU,ENSBTAT00000017916_BOVIN,ENSRNOT00000023412_RATTU,Deer_GLEAN_10002269_DAVID,PHO00002519_CHIRU,ENSMUST00000006664_MOUSE,SHEEP_ENSBTAP00000015116_SHEEP,Oryx_gazella_PRP3_10020298_GAZEL,ENSBTAP00000025750-D8_GRUNN,Muntiacus_muntjak_CSH1_10…
RPL9	GO:0003735; structural constituent of ribosome; Molecular Function.GO:0005840; ribosome; Cellular Component.GO:0006412; translation; Biological Process.GO:0019843; rRNA binding; Molecular Function	1	5	9	3	6	7	6	3	2	4	1	6	1	1	12	4	KB017362.1_cdsid_EPY78010.1_CAMEL,Deer_GLEAN_10020567_DAVID,ENSRNOT00000041351_RATTU,goat_GLEAN_10004152_GOATS,sheep_GLEAN_10001885_SHEEP,BACU007641_WHALE,ENSMUST00000080545_MOUSE,KB017236.1_cdsid_EPY78828.1_CAMEL,yakG042468_GRUNN,KB016743.1_cdsid_EPY84667.1_CAMEL,yakG026412_GRUNN,ENSRNOT00000042609_RATTU,Oryx_gazella_RPL9_10008920_GAZEL,goat_GLEAN_10019531_GOATS,ENSRNOT00000042201_RATTU,ENSRNOT0…
RPL38	GO:0003735; structural constituent of ribosome; Molecular Function.GO:0005622; intracellular; Cellular Component.GO:0005840; ribosome; Cellular Component.GO:0006412; translation; Biological Process	2	5	2	3	2	3	1	1	3	1	1	1	2	1	12	1	PHO00021871_CHIRU,ENSRNOT00000043426_RATTU,ENSRNOT00000023369_RATTU,ENSRNOT00000043108_RATTU,ENSBTAP00000037319-D1_GRUNN,SHEEP_ENSP00000390279_SHEEP,GOAT_ENSBTAP00000037319_GOATS,ENSRNOT00000048963_RATTU,ENSMUST00000077915_MOUSE,KB016538.1_cdsid_EPY87465.1_CAMEL,ENSP00000390279-D4_GRUNN,ENSRNOT00000049811_RATTU,ENSBTAT00000042547_BOVIN,ENSRNOT00000046518_RATTU,GOAT_ENSBTAP00000040182_GOATS,ENSBTA…
GBP4,GBP1,GBP6,GBP7,GBP5,GBP2,GBP3	GO:0003924; GTPase activity; Molecular Function.GO:0005525; GTP binding; Molecular Function.GO:0006955; immune response; Biological Process.GO:0003743; translation initiation factor activity; Molecular Function.GO:0005515; protein binding; Molecular Function.GO:0006413; translational initiation; Biological Process.GO:0008270; zinc ion binding; Molecular Function.GO:0009058; biosynthetic process; …	5	5	7	10	13	15	6	7	4	3	7	7	4	7	10	11	Giraffe_GBP4_10015087_GIRAF,ENSSSCP00000007378_SWINE,ENSBTAP00000019785-D2_GRUNN,Oryx_gazella_GBP7_10000274_GAZEL,ENSBTAP00000019785-D1_GRUNN,ENSRNOT00000040856_RATTU,ENSBTAP00000020043-D1_GRUNN,ENSMUST00000050011_MOUSE,ENSMUST00000029935_MOUSE,ENSBTAT00000033527_BOVIN,PHO00012330_CHIRU,ENSMUST00000090127_MOUSE,ENSECAT00000018799_HORSE,Oryx_gazella_GBP1_10005521_GAZEL,ENST00000544311_HUMAN,ENSSSC…
DEFB9,DEFB1,DEFB3	NA.GO:0005576; extracellular region; Cellular Component.GO:0006952; defense response; Biological Process	2	2	2	2	10	12	0	3	0	0	0	0	0	0	0	0	ENSBTAP00000044857-D4_GRUNN,ENSBTAT00000065980_BOVIN,GOAT_ENSBTAP00000040081_GOATS,ENSBTAP00000046999-D2_GRUNN,ENSBTAP00000047159-D1_GRUNN,SHEEP_ENSBTAP00000019635_SHEEP,Muntiacus_muntjak_DEFB3_10000588_MUNTJ,ENSBTAP00000046543-D7_GRUNN,SHEEP_ENSBTAP00000049375_SHEEP,ENSBTAT00000063757_BOVIN,ENSBTAT00000066254_BOVIN,ENSBTAP00000046539-D4_GRUNN,ENSBTAT00000009756_BOVIN,ENSBTAT00000054965_BOVIN,ENS…
UBL5	NA.GO:0005515; protein binding; Molecular Function	3	2	3	0	2	3	2	1	0	1	1	0	1	1	1	4	GOAT_ENSBTAP00000050570_GOATS,GOAT_ENSBTAP00000052140_GOATS,PHO00001191_CHIRU,Deer_GLEAN_10004827_DAVID,Deer_GLEAN_10022978_DAVID,ENSMUST00000162303_MOUSE,ENSBTAP00000052140-D1_GRUNN,ENSSSCP00000022340_SWINE,ENSMUST00000105161_MOUSE,ENST00000358666_HUMAN,ENSBTAP00000050570-D3_GRUNN,SHEEP_ENSP00000351492_SHEEP,PHO00020689_CHIRU,ENSRNOT00000027749_RATTU,PHO00013298_CHIRU,ENSBTAT00000031821_BOVIN,EN…
TMSB4X,TMSB10,TMSB15A,TMSB4Y,TMSL4,TMSL3	NA.GO:0003779; actin binding; Molecular Function.GO:0005737; cytoplasm; Cellular Component.GO:0007010; cytoskeleton organization; Biological Process	3	2	1	2	7	8	0	1	0	6	6	1	1	6	6	6	Oryx_gazella_Tmsb4x_10015164_GAZEL,ENSRNOT00000042383_RATTU,ENSBTAP00000042213-D6_GRUNN,ENSBTAT00000007429_BOVIN,ENSRNOT00000022846_RATTU,ENSRNOT00000044354_RATTU,ENSSSCP00000024044_SWINE,ENSMUST00000127404_MOUSE,ENSMUST00000114049_MOUSE,BACU008493_WHALE,ENST00000289373_HUMAN,ENSRNOT00000055447_RATTU,ENSBTAT00000007124_BOVIN,BACU019103_WHALE,ENST00000451311_HUMAN,ENSMUST00000069803_MOUSE,ENSMUST0…
NA	NA	2	0	0	0	4	9	0	0	0	0	0	0	0	0	0	0	ENSBTAT00000040008_BOVIN,ENSBTAT00000006882_BOVIN,PHO00019776_CHIRU,ENSBTAP00000039476-D22_GRUNN,ENSBTAT00000033844_BOVIN,ENSBTAT00000039687_BOVIN,ENSBTAT00000036205_BOVIN,ENSBTAT00000030994_BOVIN,ENSBTAP00000023584-D26_GRUNN,ENSBTAP00000006882-D21_GRUNN,ENSBTAT00000029807_BOVIN,PHO00014374_CHIRU,ENSBTAT00000063902_BOVIN,ENSBTAT00000026433_BOVIN,ENSBTAP00000039476-D1_GRUNN

## Sheet: Bovinae_contractions
Bovinae gene contractions
symbol	GO annotation	Pantholops hodgsonii	Ovis aries	Capra hircus	Oryx gazella	Bos grunniens	Bos taurus	Elaphurus davidianus	Muntiacus muntjak	Giraffa camelopardalis	Balaenoptera acutorostrata	Sus scrofa	Camelus ferus	Equus caballus	Homo sapiens	Rattus norvegicus	Mus musculus	Gene cluster
OR1J4,OR8S1,OR3A2,OR10G2,OR6M1,OR1L8,OR1L1,OR10X1,OR10H4,ZNF496,OR10D4P,OR12D2,OR10C1,OR2AP1,OR6C2,OLFR5,OR6C76,VWA5A,OR1L6,OR5AN1	GO:0004984; olfactory receptor activity; Molecular Function.GO:0007186; G-protein coupled receptor protein signaling pathway; Biological Process.GO:0016021; integral to membrane; Cellular Component.GO:0003676; nucleic acid binding; Molecular Function.GO:0005622; intracellular; Cellular Component.GO:0006355; regulation of transcription, DNA-dependent; Biological Process.GO:0008270; zinc ion bindin…	0	0	0	10	0	0	5	14	9	0	0	5	0	0	0	0	Oryx_gazella_OR10G2_10008003_GAZEL,Oryx_gazella_ZNF496_10006993_GAZEL,KB016641.1_cdsid_EPY85723.1_CAMEL,Deer_GLEAN_10000813_DAVID,Muntiacus_muntjak_OR10D4P_10023305_MUNTJ,Giraffe_OR1J4_10006130_GIRAF,Giraffe_OR8S1_10018764_GIRAF,Oryx_gazella_OR1L1_10012557_GAZEL,Giraffe_OR3A2_10019320_GIRAF,Oryx_gazella_OR6M1_10012106_GAZEL,Muntiacus_muntjak_OR6C2_10023002_MUNTJ,Muntiacus_muntjak_OR10G2_10005769_…
RPL35	GO:0003735; structural constituent of ribosome; Molecular Function.GO:0005622; intracellular; Cellular Component.GO:0005840; ribosome; Cellular Component.GO:0006412; translation; Biological Process	3	4	6	6	3	2	7	5	7	2	1	7	2	1	9	5	Oryx_gazella_RPL35_10013028_GAZEL,sheep_GLEAN_10020223_SHEEP,GOAT_ENSBTAP00000004161_GOATS,BACU000445_WHALE,ENSBTAT00000004161_BOVIN,BACU003152_WHALE,KB016978.1_cdsid_EPY81792.1_CAMEL,KB016856.1_cdsid_EPY83254.1_CAMEL,Muntiacus_muntjak_RPL35_10022813_MUNTJ,Muntiacus_muntjak_Rpl35_10012701_MUNTJ,Deer_GLEAN_10019550_DAVID,ENSRNOT00000042211_RATTU,ENSECAT00000009553_HORSE,Giraffe_RPL35_10009974_GIRA…
HNRNPA2B1,HNRNPA1,HNRNPA3	GO:0003676; nucleic acid binding; Molecular Function	0	2	4	2	0	0	6	2	4	3	1	1	0	0	2	0	Deer_GLEAN_10016196_DAVID,goat_GLEAN_10013211_GOATS,Giraffe_Hnrnpa2b1_10006485_GIRAF,ENSRNOT00000061073_RATTU,Oryx_gazella_Hnrnpa3_10011075_GAZEL,ENSSSCP00000005824_SWINE,BACU014340_WHALE,BACU009441_WHALE,sheep_GLEAN_10012793_SHEEP,goat_GLEAN_10012305_GOATS,Giraffe_HNRNPA1_10002459_GIRAF,Oryx_gazella_HNRNPA1_10004125_GAZEL,BACU009899_WHALE,goat_GLEAN_10007956_GOATS,Muntiacus_muntjak_HNRNPA1_10003…
ZNF814,ZNF227,ZNF471,ZNF350,ZNF850,ZNF432,ZNF805,ZFP28,ZNF613,ZNF226,ZNF621,ZNF845,ZNF304,ZNF268,ZNF91,ZFP82,ZNF135,ZNF583	GO:0003676; nucleic acid binding; Molecular Function.GO:0005622; intracellular; Cellular Component.GO:0006355; regulation of transcription, DNA-dependent; Biological Process.GO:0008270; zinc ion binding; Molecular Function.GO:0003735; structural constituent of ribosome; Molecular Function.GO:0005840; ribosome; Cellular Component.GO:0006412; translation; Biological Process.GO:0004672; protein kina…	0	0	0	7	0	0	1	8	7	2	0	0	0	0	0	0	Oryx_gazella_ZNF471_10015098_GAZEL,Muntiacus_muntjak_ZNF845_10004035_MUNTJ,BACU002089_WHALE,Oryx_gazella_ZNF350_10003780_GAZEL,Giraffe_ZNF814_10007310_GIRAF,Muntiacus_muntjak_ZNF304_10012885_MUNTJ,Muntiacus_muntjak_ZNF227_10005434_MUNTJ,Giraffe_ZNF227_10014103_GIRAF,Giraffe_ZNF471_10007276_GIRAF,Oryx_gazella_ZFP28_10015099_GAZEL,Muntiacus_muntjak_ZNF268_10008060_MUNTJ,Muntiacus_muntjak_ZNF91_1000…
RPL10A	GO:0003723; RNA binding; Molecular Function.GO:0006396; RNA processing; Biological Process	7	11	9	11	6	3	12	9	10	4	6	5	1	1	6	2	ENSRNOT00000045023_RATTU,yakA14197_GRUNN,ENSP00000363018-D6_GRUNN,ENSP00000382780-D2_GRUNN,goat_GLEAN_10013171_GOATS,ENSECAT00000014713_HORSE,Deer_GLEAN_10018308_DAVID,sheep_GLEAN_10009276_SHEEP,ENSSSCP00000022559_SWINE,ENSBTAP00000025963-D5_GRUNN,Muntiacus_muntjak_Rpl10a_10011807_MUNTJ,Deer_GLEAN_10019965_DAVID,Oryx_gazella_Rpl10a_10005064_GAZEL,Muntiacus_muntjak_Rpl10a_10021024_MUNTJ,ENSSSCP000…
RPL10,RPL10L	GO:0003735; structural constituent of ribosome; Molecular Function.GO:0005622; intracellular; Cellular Component.GO:0005840; ribosome; Cellular Component.GO:0006412; translation; Biological Process.GO:0016021; integral to membrane; Cellular Component	7	17	12	9	8	5	32	18	19	9	1	10	2	2	4	3	GOAT_ENSBTAP00000000802_GOATS,KB017742.1_cdsid_EPY75684.1_CAMEL,Deer_GLEAN_10007223_DAVID,Giraffe_RPL10_10009957_GIRAF,Deer_GLEAN_10002698_DAVID,Deer_GLEAN_10003246_DAVID,KB017488.1_cdsid_EPY77248.1_CAMEL,Giraffe_RPL10_10004833_GIRAF,KB016675.1_cdsid_EQB77516.1_CAMEL,Oryx_gazella_RPL10_10005554_GAZEL,ENSBTAT00000063980_BOVIN,Giraffe_RPL10_10019836_GIRAF,yakG005112_GRUNN,Giraffe_RPL10_10012068_GIR…
RPL6	GO:0003735; structural constituent of ribosome; Molecular Function.GO:0005622; intracellular; Cellular Component.GO:0005840; ribosome; Cellular Component.GO:0006412; translation; Biological Process	3	4	6	4	1	2	10	5	2	9	1	2	2	1	9	3	ENSRNOT00000033766_RATTU,Muntiacus_muntjak_RPL6_10001002_MUNTJ,goat_GLEAN_10011249_GOATS,ENSECAT00000018710_HORSE,ENSMUST00000171120_MOUSE,Muntiacus_muntjak_RPL6_10012621_MUNTJ,ENSRNOT00000017932_RATTU,Deer_GLEAN_10008128_DAVID,BACU005971_WHALE,BACU013726_WHALE,KB017025.1_cdsid_EPY81045.1_CAMEL,goat_GLEAN_10015941_GOATS,ENSECAT00000016209_HORSE,BACU019556_WHALE,sheep_GLEAN_10003784_SHEEP,ENSP0000…
RPL29	GO:0003735; structural constituent of ribosome; Molecular Function.GO:0005622; intracellular; Cellular Component.GO:0005840; ribosome; Cellular Component.GO:0006412; translation; Biological Process	2	3	4	4	1	1	5	1	3	5	1	29	1	1	42	10	ENSMUST00000163749_MOUSE,sheep_GLEAN_10005473_SHEEP,ENSMUST00000075152_MOUSE,Giraffe_RPL29_10010124_GIRAF,ENSRNOT00000039250_RATTU,ENSRNOT00000014849_RATTU,ENSRNOT00000057446_RATTU,ENSRNOT00000061928_RATTU,ENSRNOT00000037416_RATTU,ENSRNOT00000048888_RATTU,goat_GLEAN_10016553_GOATS,ENSRNOT00000030027_RATTU,Oryx_gazella_RPL29_10009099_GAZEL,Giraffe_RPL29_10014686_GIRAF,Muntiacus_muntjak_RPL29_10020…
EPHB1,EPHA2,EPHA3,EPHA6,EPHB2,EPHA4	GO:0005003; ephrin receptor activity; Molecular Function.GO:0005524; ATP binding; Molecular Function.GO:0016020; membrane; Cellular Component.GO:0005515; protein binding; Molecular Function	1	3	3	5	1	0	5	3	1	4	3	5	1	0	0	1	goat_GLEAN_10017009_GOATS,sheep_GLEAN_10021135_SHEEP,Oryx_gazella_EPHA2_10004756_GAZEL,sheep_GLEAN_10014965_SHEEP,SHEEP_ENSBTAP00000050878_SHEEP,ENSMUST00000108194_MOUSE,ENSSSCP00000012556_SWINE,Muntiacus_muntjak_EPHA6_10007526_MUNTJ,KB017500.1_cdsid_EPY77196.1_CAMEL,KB016923.1_cdsid_EPY82429.1_CAMEL,BACU015714_WHALE,Deer_GLEAN_10021450_DAVID,ENSECAT00000014402_HORSE,BACU000018_WHALE,PHO00002799_…
LY9,SLAMF9,PPIA,SLAMF8,CD84	GO:0003755; peptidyl-prolyl cis-trans isomerase activity; Molecular Function.NA	2	1	5	7	0	0	5	7	5	1	0	1	0	0	0	0	Muntiacus_muntjak_Ly9_10006202_MUNTJ,Deer_GLEAN_10003299_DAVID,Giraffe_Ly9_10000701_GIRAF,goat_GLEAN_10014596_GOATS,Muntiacus_muntjak_Slamf8_10001302_MUNTJ,Oryx_gazella_NA_10003011_GAZEL,Oryx_gazella_Ly9_10003014_GAZEL,goat_GLEAN_10004015_GOATS,BACU003913_WHALE,Giraffe_LY9_10000321_GIRAF,Muntiacus_muntjak_Ly9_10006203_MUNTJ,Oryx_gazella_Slamf9_10001489_GAZEL,goat_GLEAN_10014594_GOATS,KB016457.1_c…
VPREB1	NA	0	0	1	5	0	0	4	1	2	5	0	11	0	0	0	0	Oryx_gazella_NA_10000275_GAZEL,Deer_GLEAN_10003688_DAVID,KB017020.1_cdsid_EPY81145.1_CAMEL,KB017020.1_cdsid_EPY81149.1_CAMEL,BACU017168_WHALE,Giraffe_NA_10002407_GIRAF,KB016947.1_cdsid_EPY82152.1_CAMEL,KB016347.1_cdsid_EPY90128.1_CAMEL,BACU017173_WHALE,Deer_GLEAN_10015995_DAVID,BACU017178_WHALE,KB017024.1_cdsid_EPY81089.1_CAMEL,Oryx_gazella_VPREB1_10000375_GAZEL,KB016947.1_cdsid_EPY82155.1_CAMEL,…
CTAGE5,CTAGE1	NA	4	4	3	6	2	1	4	6	5	1	0	9	0	0	0	0	sheep_GLEAN_10010298_SHEEP,sheep_GLEAN_10008706_SHEEP,KB017124.1_cdsid_EPY79975.1_CAMEL,PHO00002473_CHIRU,Giraffe_CTAGE5_10006927_GIRAF,KB018454.1_cdsid_EPY73758.1_CAMEL,Muntiacus_muntjak_CTAGE5_10018122_MUNTJ,KB016918.1_cdsid_EPY82504.1_CAMEL,Oryx_gazella_CTAGE5_10000304_GAZEL,Oryx_gazella_CTAGE5_10011998_GAZEL,KB016891.1_cdsid_EPY82838.1_CAMEL,KB017123.1_cdsid_EPY80025.1_CAMEL,KB019236.1_cdsid_…
TKDP1,TFPI	GO:0004867; serine-type endopeptidase inhibitor activity; Molecular Function.GO:0016021; integral to membrane; Cellular Component.GO:0042765; GPI-anchor transamidase complex; Cellular Component	0	1	0	4	0	0	3	5	2	1	0	0	0	0	0	0	Muntiacus_muntjak_TKDP1_10018536_MUNTJ,Giraffe_NA_10020767_GIRAF,sheep_GLEAN_10016953_SHEEP,Oryx_gazella_TKDP1_10023120_GAZEL,Muntiacus_muntjak_NA_10018540_MUNTJ,Oryx_gazella_TKDP1_10023118_GAZEL,Muntiacus_muntjak_NA_10015703_MUNTJ,Deer_GLEAN_10001711_DAVID,Oryx_gazella_NA_10009699_GAZEL,Oryx_gazella_TFPI_10023117_GAZEL,Giraffe_TKDP1_10020766_GIRAF,Muntiacus_muntjak_TKDP1_10018538_MUNTJ,Muntiacus…
NA	NA	3	1	3	4	0	0	0	3	2	0	0	1	0	0	0	0	PHO00002703_CHIRU,Giraffe_NA_10009094_GIRAF,Muntiacus_muntjak_NA_10000236_MUNTJ,Giraffe_NA_10005191_GIRAF,Muntiacus_muntjak_NA_10000350_MUNTJ,Muntiacus_muntjak_NA_10006782_MUNTJ,Oryx_gazella_NA_10005112_GAZEL,Oryx_gazella_NA_10018930_GAZEL,Oryx_gazella_NA_10002604_GAZEL,goat_GLEAN_10001457_GOATS,PHO00000144_CHIRU,PHO00000142_CHIRU,KB016394.1_cdsid_EPY89549.1_CAMEL,goat_GLEAN_10000804_GOATS,Oryx_g…
NA	NA	2	0	3	0	0	0	0	8	4	0	0	1	0	0	0	1	Giraffe_NA_10000128_GIRAF,Muntiacus_muntjak_NA_10014704_MUNTJ,Muntiacus_muntjak_NA_10014701_MUNTJ,Muntiacus_muntjak_NA_10014706_MUNTJ,goat_GLEAN_10020343_GOATS,PHO00000835_CHIRU,KB017076.1_cdsid_EPY80537.1_CAMEL,goat_GLEAN_10018842_GOATS,goat_GLEAN_10011500_GOATS,Giraffe_NA_10006563_GIRAF,Giraffe_NA_10000150_GIRAF,Muntiacus_muntjak_NA_10006500_MUNTJ,ENSMUST00000172433_MOUSE,Giraffe_NA_10000151_GI…

## Sheet: Bovinae_expansions
Bovinae gene expansions
symbol	GO annotation	Pantholops hodgsonii	Ovis aries	Capra hircus	Oryx gazella	Bos grunniens	Bos taurus	Elaphurus davidianus	Muntiacus muntjak	Giraffa camelopardalis	Balaenoptera acutorostrata	Sus scrofa	Camelus ferus	Equus caballus	Homo sapiens	Rattus norvegicus	Mus musculus	Gene cluster
OR10A4,OR10C1,OR10AG1,OR10A7,OR10A5,OR10P1,OLFR9,OR10A3,OR10A6,OR10A2	GO:0004984; olfactory receptor activity; Molecular Function.GO:0007186; G-protein coupled receptor protein signaling pathway; Biological Process.GO:0016021; integral to membrane; Cellular Component	20	25	23	21	27	27	22	13	11	6	19	19	22	9	33	37	PHO00008582_CHIRU,ENSBTAT00000052282_BOVIN,ENSP00000311477-D11_GRUNN,ENSBTAP00000028258-D3_GRUNN,Deer_GLEAN_10001432_DAVID,ENSP00000320560-D92_GRUNN,ENSMUST00000071410_MOUSE,SHEEP_ENSBTAP00000053097_SHEEP,ENST00000379831_HUMAN,GOAT_ENSBTAP00000052003_GOATS,ENSBTAP00000049653-D17_GRUNN,PHO00008583_CHIRU,SHEEP_ENSBTAP00000051915-D2_SHEEP,ENSBTAP00000012751-D20_GRUNN,GOAT_ENSBTAP00000049044_GOATS,GO…
OR5T1,OLFR1052,OLFR1019,OLFR1020,OLFR1094,OR5C1,OR5AP2,OLFR1009,OR5T2,OR5W2,OR5AS1,OLFR1102,OR8U9,OR5T3,OR5AR1,OR5J2,OR5I1	GO:0004984; olfactory receptor activity; Molecular Function.GO:0007186; G-protein coupled receptor protein signaling pathway; Biological Process.GO:0016021; integral to membrane; Cellular Component	21	20	20	14	35	30	20	6	8	3	27	23	24	10	49	44	KE537625.1_cdsid_EPY72563.1_CAMEL,ENSRNOT00000050404_RATTU,PHO00021771_CHIRU,ENSRNOT00000046688_RATTU,ENSSSCP00000006229_SWINE,ENSMUST00000099839_MOUSE,ENSECAT00000006231_HORSE,SHEEP_ENSBTAP00000050673-D5_SHEEP,ENSMUST00000077471_MOUSE,KB016390.1_cdsid_EPY89598.1_CAMEL,ENSBTAT00000063042_BOVIN,ENSBTAT00000019026_BOVIN,ENSSSCP00000015394_SWINE,ENSMUST00000099867_MOUSE,KE537625.1_cdsid_EPY72558.1_C…
OLFR12,OR9K2	GO:0004984; olfactory receptor activity; Molecular Function.GO:0007186; G-protein coupled receptor protein signaling pathway; Biological Process.GO:0016021; integral to membrane; Cellular Component	15	19	13	15	28	27	20	8	10	3	21	9	18	1	13	11	PHO00014018_CHIRU,ENSP00000317161-D96_GRUNN,ENSBTAT00000048017_BOVIN,ENSMUST00000058907_MOUSE,ENSRNOT00000052361_RATTU,ENSMUST00000062964_MOUSE,Giraffe_Olfr12_10008128_GIRAF,ENSBTAT00000055437_BOVIN,ENSP00000322944-D29_GRUNN,ENSBTAP00000052753-D4_GRUNN,PHO00014022_CHIRU,Giraffe_Olfr12_10008125_GIRAF,ENSBTAT00000056598_BOVIN,Oryx_gazella_OR9K2_10011909_GAZEL,sheep_GLEAN_10008436_SHEEP,ENSECAT00000…
OR2S2,OR13C8,OR2K2,OR13C2,OR13F1,OR13J1,OR13C3,OR13C4,OR13D1,OR13C9,OR13C5	GO:0004984; olfactory receptor activity; Molecular Function.GO:0007186; G-protein coupled receptor protein signaling pathway; Biological Process.GO:0016021; integral to membrane; Cellular Component	16	19	18	17	24	23	20	20	12	11	27	15	23	11	17	11	ENSBTAT00000063153_BOVIN,ENSP00000357132-D39_GRUNN,GOAT_ENSBTAP00000036869-D2_GOATS,ENSBTAT00000063332_BOVIN,Deer_GLEAN_10006943_DAVID,GOAT_ENSP00000363911-D3_GOATS,ENSRNOT00000024724_RATTU,ENSP00000320560-D43_GRUNN,GOAT_ENSBTAP00000036869_GOATS,ENST00000334726_HUMAN,Muntiacus_muntjak_OR2S2_10019396_MUNTJ,PHO00013194_CHIRU,ENSBTAT00000050501_BOVIN,Muntiacus_muntjak_OR2S2_10009345_MUNTJ,BACU017524…
OR8H3,OR8I2,OR5AU1,OR5F1,OLFR1030,OR8H2,OR8H1	GO:0004984; olfactory receptor activity; Molecular Function.GO:0007186; G-protein coupled receptor protein signaling pathway; Biological Process.GO:0016021; integral to membrane; Cellular Component	9	8	8	10	21	8	5	7	6	3	13	7	4	6	9	7	ENSRNOT00000043964_RATTU,ENSRNOT00000015439_RATTU,PHO00008128_CHIRU,ENSMUST00000099872_MOUSE,Oryx_gazella_OR8H3_10000890_GAZEL,ENSMUST00000094913_MOUSE,ENST00000313472_HUMAN,Muntiacus_muntjak_OR8I2_10003340_MUNTJ,ENSBTAP00000052264-D1_GRUNN,ENSBTAP00000047535-D70_GRUNN,BACU008977_WHALE,ENSSSCP00000021315_SWINE,Oryx_gazella_OR5F1_10001803_GAZEL,ENSRNOT00000013150_RATTU,SHEEP_ENSP00000323982-D2_SHE…
OR5L1,OR5D13,OR5D18,OR5L2,OR5D14,OR5D16	GO:0004984; olfactory receptor activity; Molecular Function.GO:0007186; G-protein coupled receptor protein signaling pathway; Biological Process.GO:0016021; integral to membrane; Cellular Component	4	8	6	5	24	18	13	4	6	1	6	6	8	6	12	15	Deer_GLEAN_10009259_DAVID,ENSECAT00000000735_HORSE,BACU008973_WHALE,KB016679.1_cdsid_EPY85201.1_CAMEL,Giraffe_OR5L1_10000381_GIRAF,ENSMUST00000099843_MOUSE,Oryx_gazella_OR5L2_10000753_GAZEL,ENSECAT00000007127_HORSE,ENSBTAP00000052310-D3_GRUNN,Oryx_gazella_OR5D13_10002151_GAZEL,ENSECAT00000000764_HORSE,ENSBTAT00000054517_BOVIN,ENSECAT00000007858_HORSE,ENSBTAP00000048184-D1_GRUNN,Giraffe_OR5D13_100…
OLFR1038,OR8J1,OR8J3,OR8J2,OR8K1,OR8K5,OR8K3,OR5AL1,OLFR1044,OR5R1,OR8U1	GO:0004984; olfactory receptor activity; Molecular Function.GO:0007186; G-protein coupled receptor protein signaling pathway; Biological Process.GO:0016021; integral to membrane; Cellular Component	20	21	21	12	38	28	18	6	2	0	24	17	16	7	22	34	ENSECAT00000004896_HORSE,ENSECAT00000023139_HORSE,ENSMUST00000099892_MOUSE,ENSMUST00000099897_MOUSE,ENSRNOT00000012912_RATTU,GOAT_ENSP00000323688-D27_GOATS,ENSBTAP00000030292-D8_GRUNN,ENSSSCP00000006224_SWINE,ENSRNOT00000012899_RATTU,ENSMUST00000099901_MOUSE,ENSP00000308595-D1_GRUNN,PHO00008132_CHIRU,ENSBTAP00000033232-D72_GRUNN,ENSP00000301529-D60_GRUNN,Deer_GLEAN_10003911_DAVID,GOAT_ENSP0000030…
OR5K3,OR5K4,OR5AC1,OR5H1,OR5AC2,OR5H6,OR5H15,OR5K2,OR5H14,OR5K1,OR5H2	NA.GO:0004984; olfactory receptor activity; Molecular Function.GO:0007186; G-protein coupled receptor protein signaling pathway; Biological Process.GO:0016021; integral to membrane; Cellular Component	14	19	12	3	20	8	5	1	0	0	26	3	12	10	31	25	GOAT_ENSP00000347418-D15_GOATS,ENSRNOT00000041491_RATTU,ENSBTAT00000008047_BOVIN,ENSECAT00000005624_HORSE,GOAT_ENSP00000373196-D16_GOATS,KB017828.1_cdsid_EPY75329.1_CAMEL,ENSMUST00000058564_MOUSE,SHEEP_ENSP00000373196-D5_SHEEP,ENSRNOT00000060875_RATTU,ENSMUST00000084791_MOUSE,SHEEP_ENSP00000373196_SHEEP,PHO00014878_CHIRU,ENSECAT00000005744_HORSE,ENSMUST00000114343_MOUSE,ENSRNOT00000048289_RATTU,S…
OR7A10,OR7A17,OR7C2,OR7A5,OR7A2P	GO:0004984; olfactory receptor activity; Molecular Function.GO:0007186; G-protein coupled receptor protein signaling pathway; Biological Process.GO:0016021; integral to membrane; Cellular Component.GO:0003735; structural constituent of ribosome; Molecular Function.GO:0005622; intracellular; Cellular Component.GO:0005840; ribosome; Cellular Component.GO:0006412; translation; Biological Process	48	28	21	21	66	40	43	21	13	1	32	9	9	4	11	8	Oryx_gazella_OR7A17_10007107_GAZEL,SHEEP_ENSP00000328144-D3_SHEEP,ENSBTAT00000064850_BOVIN,GOAT_ENSBTAP00000046656-D5_GOATS,PHO00009347_CHIRU,PHO00009364_CHIRU,Giraffe_OR7A10_10003246_GIRAF,Oryx_gazella_OR7A10_10006898_GAZEL,Oryx_gazella_OR7A17_10001232_GAZEL,ENSBTAT00000063735_BOVIN,ENSSSCP00000023768_SWINE,ENSBTAT00000054308_BOVIN,ENSBTAP00000050927-D68_GRUNN,ENSP00000303195-D78_GRUNN,Oryx_gaze…
OR2Z1,OR2AG1,OR2V1,OR2T29,OR2V2,OR2T3,OR2T2,OR2M2,OR2M4,OR2T1,OR2T27,OR2T12,OR2T6,OR2T34,OR2T8,OR2T33,OR2T4,OR2T11,OR2M3,OR2AG2,OR2T35,OR2M7,OR2T5,OR2M5,OR2T10	GO:0004984; olfactory receptor activity; Molecular Function.GO:0007186; G-protein coupled receptor protein signaling pathway; Biological Process.GO:0016021; integral to membrane; Cellular Component.GO:0000786; nucleosome; Cellular Component.GO:0003677; DNA binding; Molecular Function.GO:0005634; nucleus; Cellular Component.GO:0006334; nucleosome assembly; Biological Process.GO:0006352; transcript…	36	37	35	30	42	36	36	31	18	3	36	19	32	25	34	30	ENSBTAT00000028103_BOVIN,Oryx_gazella_OR2T8_10006980_GAZEL,ENSECAT00000001502_HORSE,ENSECAT00000001314_HORSE,ENSP00000324687-D2_GRUNN,ENSP00000355431-D2_GRUNN,ENST00000359682_HUMAN,ENSECAT00000001181_HORSE,ENSRNOT00000051126_RATTU,ENSBTAT00000064254_BOVIN,Oryx_gazella_OR2T2_10006982_GAZEL,Muntiacus_muntjak_OR2V2_10002874_MUNTJ,SHEEP_ENSBTAP00000050260_SHEEP,BACU004873_WHALE,ENSRNOT00000050693_RAT…
OR2AE1,OR2T27,OR2T2	GO:0004984; olfactory receptor activity; Molecular Function.GO:0007186; G-protein coupled receptor protein signaling pathway; Biological Process.GO:0016021; integral to membrane; Cellular Component	5	9	3	7	12	8	11	4	2	2	15	8	4	1	2	1	Muntiacus_muntjak_OR2T27_10001918_MUNTJ,Muntiacus_muntjak_OR2T27_10012580_MUNTJ,ENST00000316368_HUMAN,ENSP00000399078-D86_GRUNN,PHO00017021_CHIRU,goat_GLEAN_10007683_GOATS,ENSBTAT00000063797_BOVIN,ENSSSCP00000014866_SWINE,Giraffe_OR2AE1_10002544_GIRAF,Oryx_gazella_OR2T27_10000058_GAZEL,Deer_GLEAN_10012084_DAVID,ENSSSCP00000026059_SWINE,ENSSSCP00000027010_SWINE,ENSSSCP00000014865_SWINE,Deer_GLEAN_…
OR4P4,OR4S2,OR4X2,OR4B1,OR4X1,OR4C16,OR4C11,OR4C3,OR4S1	GO:0004984; olfactory receptor activity; Molecular Function.GO:0007186; G-protein coupled receptor protein signaling pathway; Biological Process.GO:0016021; integral to membrane; Cellular Component.GO:0020037; heme binding; Molecular Function	18	16	18	12	35	21	33	25	8	2	30	20	13	8	35	28	Muntiacus_muntjak_OR4P4_10000548_MUNTJ,ENSRNOT00000040581_RATTU,Muntiacus_muntjak_OR4S2_10002891_MUNTJ,Deer_GLEAN_10003242_DAVID,KB018189.1_cdsid_EPY74267.1_CAMEL,ENSP00000321419-D43_GRUNN,Muntiacus_muntjak_OR4P4_10000555_MUNTJ,PHO00021384_CHIRU,SHEEP_ENSBTAP00000049640_SHEEP,Muntiacus_muntjak_OR4P4_10019746_MUNTJ,Deer_GLEAN_10001007_DAVID,ENSMUST00000099750_MOUSE,ENSRNOT00000050785_RATTU,Muntiac…
OR4F6,OR4F3,OR4F15,OR4F21,OR4F16,OR4F29	GO:0004984; olfactory receptor activity; Molecular Function.GO:0007186; G-protein coupled receptor protein signaling pathway; Biological Process.GO:0016021; integral to membrane; Cellular Component	23	17	23	12	26	21	18	3	4	0	34	12	29	6	25	20	sheep_GLEAN_10004539_SHEEP,PHO00020541_CHIRU,ENSRNOT00000052368_RATTU,KB017602.1_cdsid_EPY76509.1_CAMEL,ENSP00000409316-D13_GRUNN,SHEEP_ENSBTAP00000018984_SHEEP,ENSMUST00000090329_MOUSE,KB019137.1_cdsid_EPY73123.1_CAMEL,ENSMUST00000058176_MOUSE,PHO00020546_CHIRU,ENSMUST00000099596_MOUSE,ENSECAT00000003526_HORSE,GOAT_ENSBTAP00000049625-D24_GOATS,ENSRNOT00000041799_RATTU,Oryx_gazella_OR4F3_10001160…
OR4A15,OR4C46,OR4A47,OLFR140,OR4C15,OR4C13,OR4C12,OR4C45,OR4C6,OR4A4P,OR4A16,OR4C3,OR4C5,OR4A5	GO:0004984; olfactory receptor activity; Molecular Function.GO:0007186; G-protein coupled receptor protein signaling pathway; Biological Process.GO:0016021; integral to membrane; Cellular Component	21	34	13	22	65	34	64	42	7	0	26	39	9	11	56	55	Deer_GLEAN_10005530_DAVID,Deer_GLEAN_10003622_DAVID,Muntiacus_muntjak_OR4C46_10021749_MUNTJ,Deer_GLEAN_10012468_DAVID,Deer_GLEAN_10003888_DAVID,ENSRNOT00000049678_RATTU,Oryx_gazella_Olfr140_10000481_GAZEL,ENSBTAT00000063970_BOVIN,ENSRNOT00000047910_RATTU,sheep_GLEAN_10012443_SHEEP,Muntiacus_muntjak_OR4C46_10001089_MUNTJ,ENSSSCP00000015425_SWINE,Oryx_gazella_OR4C46_10001387_GAZEL,ENSSSCP0000002323…
OR6C4,OR6C76,OR6C1,OR2AP1,OR6C2,OR6C75,OR6C3,OR6C74,OR6C68,OR6C70,OR6C65,OR6C6	GO:0003924; GTPase activity; Molecular Function.GO:0004984; olfactory receptor activity; Molecular Function.GO:0005525; GTP binding; Molecular Function.GO:0007186; G-protein coupled receptor protein signaling pathway; Biological Process.GO:0016021; integral to membrane; Cellular Component.GO:0003746; translation elongation factor activity; Molecular Function.GO:0005853; eukaryotic translation elo…	51	34	32	22	60	44	22	5	9	1	54	16	53	12	70	48	ENSSSCP00000000364_SWINE,ENSBTAP00000008284-D24_GRUNN,ENSRNOT00000043396_RATTU,ENSBTAT00000044037_BOVIN,ENSSSCP00000020554_SWINE,Deer_GLEAN_10000469_DAVID,ENSRNOT00000012866_RATTU,ENSRNOT00000049493_RATTU,PHO00015856_CHIRU,SHEEP_ENSBTAP00000051071-D3_SHEEP,PHO00015918_CHIRU,Deer_GLEAN_10003236_DAVID,ENSSSCP00000022081_SWINE,ENSBTAT00000055881_BOVIN,ENSMUST00000076508_MOUSE,ENSRNOT00000051053_RATT…
OR51F2,OR51L1,OR51G2,OR51I2,OR51A4,OR51I1,OR51F1,OR51H1P,OR51A7,OR51G1,OR51J1,OR52K2,OR52K1,OR51T1,OR51A2,AC103710.1,OR51C1P	GO:0004984; olfactory receptor activity; Molecular Function.GO:0007186; G-protein coupled receptor protein signaling pathway; Biological Process.GO:0016021; integral to membrane; Cellular Component.GO:0004977; melanocortin receptor activity; Molecular Function	37	34	33	34	53	35	37	44	29	3	34	30	32	14	27	31	PHO00020943_CHIRU,ENSSSCP00000023982_SWINE,Oryx_gazella_OR51I2_10004209_GAZEL,Deer_GLEAN_10018945_DAVID,ENSSSCP00000015698_SWINE,SHEEP_ENSP00000318956-D4_SHEEP,ENSBTAT00000026039_BOVIN,SHEEP_ENSBTAP00000048734_SHEEP,PHO00021023_CHIRU,KB016421.1_cdsid_EPY89270.1_CAMEL,Muntiacus_muntjak_OR51I2_10003253_MUNTJ,ENSMUST00000051505_MOUSE,Muntiacus_muntjak_OR51F1_10003247_MUNTJ,PHO00020925_CHIRU,ENSBTAT0…
OR52P1P,OR52B6,OR52H1,OR52E8,OR52B2,OR52K1,OR52D1,OR52J3,OR52E2,OR52E1,OR52E4,OR52E5,OR52B4,OR52Z1,OR52E6,AC022762.1	GO:0004984; olfactory receptor activity; Molecular Function.GO:0007186; G-protein coupled receptor protein signaling pathway; Biological Process.GO:0016021; integral to membrane; Cellular Component.GO:0004721; phosphoprotein phosphatase activity; Molecular Function.GO:0005634; nucleus; Cellular Component.GO:0006397; mRNA processing; Biological Process.GO:0004977; melanocortin receptor activity; M…	25	31	31	22	37	38	29	28	21	3	34	25	31	11	32	32	Giraffe_OR52P1P_10017583_GIRAF,ENSECAT00000003074_HORSE,ENSRNOT00000023279_RATTU,KB016919.1_cdsid_EPY82482.1_CAMEL,Giraffe_OR52B6_10003060_GIRAF,PHO00021017_CHIRU,ENSRNOT00000023349_RATTU,PHO00020973_CHIRU,Muntiacus_muntjak_OR52E5_10002225_MUNTJ,ENSMUST00000098196_MOUSE,ENSBTAT00000002647_BOVIN,SHEEP_ENSBTAP00000049276_SHEEP,PHO00020949_CHIRU,ENSSSCP00000021890_SWINE,ENSBTAT00000027905_BOVIN,Deer…
OR52A1,OR52A5,OR52A4	GO:0004984; olfactory receptor activity; Molecular Function.GO:0007186; G-protein coupled receptor protein signaling pathway; Biological Process.GO:0016021; integral to membrane; Cellular Component.GO:0004980; melanocyte-stimulating hormone receptor activity; Molecular Function	8	10	10	8	16	13	5	3	5	0	8	5	10	3	5	7	SHEEP_ENSBTAP00000046401_SHEEP,ENSBTAP00000043136-D78_GRUNN,ENSSSCP00000015652_SWINE,ENSSSCP00000015640_SWINE,ENSBTAT00000054204_BOVIN,GOAT_ENSBTAP00000042677-D33_GOATS,ENSSSCP00000015637_SWINE,ENSBTAP00000002647-D62_GRUNN,GOAT_ENSBTAP00000052058-D3_GOATS,Giraffe_OR52A1_10003023_GIRAF,KB019771.1_cdsid_EPY72753.1_CAMEL,ENSECAT00000024370_HORSE,SHEEP_ENSP00000333196-D26_SHEEP,Oryx_gazella_OR52A1_10…
VN1R4,CFC1,VN1R2,TARM1,VN1R1	GO:0007186; G-protein coupled receptor protein signaling pathway; Biological Process.GO:0016021; integral to membrane; Cellular Component.GO:0016503; pheromone receptor activity; Molecular Function	23	14	17	3	29	16	11	3	4	1	10	4	15	3	54	143	Muntiacus_muntjak_TARM1_10006624_MUNTJ,ENSMUST00000168398_MOUSE,ENSMUST00000062811_MOUSE,ENSECAT00000000844_HORSE,Giraffe_VN1R4_10000104_GIRAF,ENSMUST00000167253_MOUSE,ENSMUST00000049819_MOUSE,ENSMUST00000050416_MOUSE,ENSMUST00000173886_MOUSE,ENSMUST00000172551_MOUSE,PHO00021506_CHIRU,ENSMUST00000078475_MOUSE,ENSSSCP00000006179_SWINE,ENSMUST00000168926_MOUSE,ENSMUST00000075053_MOUSE,ENSBTAT000000…
CD1E,CD1D,CD1A,CD1B,CD1C	GO:0006955; immune response; Biological Process.GO:0016020; membrane; Cellular Component.GO:0019882; antigen processing and presentation; Biological Process.NA	7	8	11	8	10	12	4	6	1	2	4	5	11	5	1	2	Oryx_gazella_NA_10000171_GAZEL,goat_GLEAN_10006919_GOATS,ENSECAT00000009056_HORSE,KB016326.1_cdsid_EPY90211.1_CAMEL,ENSBTAT00000038392_BOVIN,ENST00000368168_HUMAN,Deer_GLEAN_10004374_DAVID,Deer_GLEAN_10004375_DAVID,ENSBTAT00000031114_BOVIN,ENSBTAP00000009739-D3_GRUNN,ENSBTAP00000001274-D1_GRUNN,ENSBTAT00000055572_BOVIN,ENSBTAT00000052046_BOVIN,SHEEP_ENSBTAP00000013155_SHEEP,ENSBTAP00000033858-D2_…
TGAS006M08.1,HIS.H4,HIST2H4B,HIST1H4B,HIST1H4H,HIST1H4D,HIST2H4A,HIST1H4I,HIST1H4E,HIST1H4G,HIST1H4C,HIST1H4J,HIST1H4L,HIST1H4K,HIST1H4F,HIST4H4	GO:0000786; nucleosome; Cellular Component.GO:0003677; DNA binding; Molecular Function.GO:0005634; nucleus; Cellular Component.GO:0006334; nucleosome assembly; Biological Process.GO:0006352; transcription initiation; Biological Process.GO:0016986; transcription initiation factor activity; Molecular Function.GO:0006352; transcription initiation, DNA-dependent; Biological Process	14	14	13	13	27	21	14	6	15	13	7	14	13	14	11	13	ENSECAT00000004418_HORSE,BACU007806_WHALE,BACU006907_WHALE,Giraffe_TGas006m08.1_10003751_GIRAF,GOAT_ENSP00000367034-D2_GOATS,Giraffe_TGas006m08.1_10003764_GIRAF,ENST00000369157_HUMAN,ENSSSCP00000020000_SWINE,Giraffe_NA_10003756_GIRAF,KB016868.1_cdsid_EPY83090.1_CAMEL,ENSBTAT00000056505_BOVIN,PHO00007141_CHIRU,ENST00000377364_HUMAN,KB016868.1_cdsid_EPY83088.1_CAMEL,ENSP00000366581-D9_GRUNN,Oryx_ga…
HIST1H2BA,HIST1H2BN,HIST2H2BF,SUBH2BV,HIST1H2BH,HIST2H2BE,HIST1H2BK,HIST1H2BB,HIST3H2BB,HIST1H2BM,ZGC:112234,H2BFWT,HIST1H2BJ,H2B-VII,HISTH2B,HIST1H2BL,HIST1H2BF,HIST1H2BG,H2BFM,HIST1H2BD,HIST1H2BE,HIST1H2BO,HIST1H2BC,HIST1H2BI	GO:0000786; nucleosome; Cellular Component.GO:0003677; DNA binding; Molecular Function.GO:0005634; nucleus; Cellular Component.GO:0006334; nucleosome assembly; Biological Process	26	26	26	29	85	77	25	16	22	23	22	23	22	20	14	20	SHEEP_ENSBTAP00000052168-D4_SHEEP,ENST00000359465_HUMAN,ENSBTAT00000021322_BOVIN,ENSBTAP00000023918-D2_GRUNN,BACU007804_WHALE,Muntiacus_muntjak_NA_10005963_MUNTJ,ENSBTAT00000038531_BOVIN,KB016868.1_cdsid_EPY83094.1_CAMEL,ENSBTAT00000023918_BOVIN,Deer_GLEAN_10002503_DAVID,Deer_GLEAN_10001027_DAVID,Giraffe_NA_10000794_GIRAF,ENSBTAP00000033317-D1_GRUNN,Oryx_gazella_zgc:112234_10000344_GAZEL,Deer_GLE…
ZNF829,ZNF565,ZNF420,ZFP28,ZNF546,ZNF181,ZNF527,ZNF570,ZNF345,ZFP30,ZNF529,ZFP82,ZNF461,ZNF470,ZNF583,ZNF567,ZNF404,ZFP14,ZNF566,ZNF383,ZNF471,ZNF850,ZNF582,ZNF30,ZNF790,ZNF571,ZNF302,ZNF607,ZNF540,ZNF568,ZNF780B,ZNF283,ZNF140,ZNF573	GO:0003676; nucleic acid binding; Molecular Function.GO:0005622; intracellular; Cellular Component.GO:0006355; regulation of transcription, DNA-dependent; Biological Process.GO:0008270; zinc ion binding; Molecular Function	13	11	11	10	18	17	11	11	15	23	21	0	28	32	15	18	SHEEP_ENSBTAP00000050706_SHEEP,GOAT_ENSBTAP00000052044-D8_GOATS,BACU002087_WHALE,ENSSSCP00000021180_SWINE,ENSBTAT00000054598_BOVIN,PHO00009705_CHIRU,ENSRNOT00000028151_RATTU,ENSECAT00000011571_HORSE,ENSBTAT00000053429_BOVIN,ENSP00000354453-D12_GRUNN,Giraffe_ZNF829_10017817_GIRAF,ENSMUST00000088785_MOUSE,PHO00006276_CHIRU,ENSBTAT00000000598_BOVIN,ENSMUST00000077787_MOUSE,ENSP00000327538-D85_GRUNN,…
ZNF616,ZNF665,ZNF16,ZNF836,ZNF347,ZNF404,ZNF568,ZNF208,ZNF624,ZNF197,ZNF473,ZNF677,ZNF91,ZNF729,ZNF345,ZNF271,ZNF850,ZFP62,ZNF160,ZNF845,ZNF480,ZNF99,AC022415.1,ZNF28,ZNF415,ZNF320,ZNF578,ZNF611,ZNF468,ZNF841,ZNF594,ZNF610,ZNF880,ZNF766,ZNF600,ZNF860,ZNF701,ZNF528,ZNF808,ZNF83	GO:0003676; nucleic acid binding; Molecular Function.GO:0005622; intracellular; Cellular Component.GO:0006355; regulation of transcription, DNA-dependent; Biological Process.GO:0008270; zinc ion binding; Molecular Function.GO:0003677; DNA binding; Molecular Function.GO:0000786; nucleosome; Cellular Component.GO:0005634; nucleus; Cellular Component.GO:0006334; nucleosome assembly; Biological Proce…	22	13	15	25	42	36	11	13	17	30	14	0	27	32	9	23	ENSMUST00000034259_MOUSE,Muntiacus_muntjak_ZNF845_10005300_MUNTJ,BACU005995_WHALE,Muntiacus_muntjak_ZNF271_10022861_MUNTJ,ENST00000397104_HUMAN,ENSSSCP00000006177_SWINE,ENST00000300619_HUMAN,Giraffe_ZNF616_10003888_GIRAF,SHEEP_ENSBTAP00000049089_SHEEP,PHO00021501_CHIRU,GOAT_ENSBTAP00000014679_GOATS,ENSECAT00000016521_HORSE,ENSMUST00000099449_MOUSE,ENSRNOT00000032909_RATTU,ENSSSCP00000025766_SWINE…
ZNF41,ZFP27,ZNF182,ZNF84,ZNF300,ZNF674,ZNF12,ZNF248,RBAK,ZFP1,ZNF175,ZNF33B,ZNF605,ZNF81,ZNF350,ZNF613,ZNF432,ZNF484,ZNF614,ZFP37,ZNF649,ZNF334,ZNF382,ZNF567,ZNF585A,ZNF615,ZNF585B,ZNF793,ZNF26,ZNF510,ZNF487P,ZNF658	GO:0003676; nucleic acid binding; Molecular Function.GO:0005622; intracellular; Cellular Component.GO:0006355; regulation of transcription, DNA-dependent; Biological Process.GO:0008270; zinc ion binding; Molecular Function	21	18	18	13	24	28	11	17	10	31	31	0	29	25	19	21	Muntiacus_muntjak_ZNF350_10008062_MUNTJ,ENSECAT00000021698_HORSE,ENSP00000316933-D95_GRUNN,ENSMUST00000161458_MOUSE,ENSSSCP00000013072_SWINE,ENSP00000363344-D1_GRUNN,ENSECAT00000016690_HORSE,ENSSSCP00000011916_SWINE,ENSBTAT00000054072_BOVIN,Giraffe_ZNF41_10006159_GIRAF,ENSSSCP00000005871_SWINE,ENSRNOT00000034545_RATTU,PHO00009283_CHIRU,Oryx_gazella_ZNF84_10004915_GAZEL,PHO00019728_CHIRU,Giraffe_Z…
ZNF66P,ZNF727,ZNF479,ZNF267,ZNF534,ZNF480,ZNF726,ZNF738,ZNF695,ZNF721,ZNF90,ZNF141,ZNF780A,ZNF195,ZNF595,ZNF670	GO:0003676; nucleic acid binding; Molecular Function.GO:0005622; intracellular; Cellular Component.GO:0006355; regulation of transcription, DNA-dependent; Biological Process.NA	1	0	2	0	2	5	0	10	1	0	2	0	1	12	0	6	ENSMUST00000074813_MOUSE,ENST00000301085_HUMAN,Muntiacus_muntjak_ZNF727_10000863_MUNTJ,ENSBTAP00000024349-D34_GRUNN,ENST00000354515_HUMAN,ENST00000334589_HUMAN,Muntiacus_muntjak_ZNF727_10000116_MUNTJ,ENST00000380870_HUMAN,PHO00009136_CHIRU,goat_GLEAN_10001045_GOATS,Muntiacus_muntjak_ZNF727_10000215_MUNTJ,ENST00000487338_HUMAN,Giraffe_ZNF66P_10003876_GIRAF,ENSMUST00000060609_MOUSE,Muntiacus_muntja…
NKG2A,KLRC2,KLRC1,KLRD1,KLRK1,RP11-277P12.6,KLRC4,KLRC3	GO:0005488; binding; Molecular Function	6	5	3	1	12	10	7	5	1	2	6	0	6	7	8	9	PHO00009674_CHIRU,ENSRNOT00000012743_RATTU,ENSSSCP00000000673_SWINE,ENSRNOT00000012586_RATTU,BACU020043_WHALE,ENSBTAP00000006472-D3_GRUNN,ENSMUST00000095409_MOUSE,ENSBTAT00000031648_BOVIN,Oryx_gazella_NKG2A_10003961_GAZEL,ENSBTAP00000006472-D8_GRUNN,Deer_GLEAN_10000630_DAVID,Deer_GLEAN_10001544_DAVID,ENSRNOT00000044301_RATTU,GOAT_ENSBTAP00000052870-D2_GOATS,ENSBTAT00000042959_BOVIN,ENSBTAT0000000…
CLEC2L,CD69,CLEC5A,KLRF2,KLRG1,CLEC2B,CLECL1,KLRF1,CLEC2D,KLRB1,CLEC2A	GO:0005488; binding; Molecular Function.GO:0005529; sugar binding; Molecular Function	8	7	10	4	13	12	3	6	3	2	7	3	9	10	18	17	ENSSSCP00000024397_SWINE,ENSSSCP00000029643_SWINE,Muntiacus_muntjak_CLEC2B_10002474_MUNTJ,BACU006746_WHALE,yakG020343_GRUNN,ENSBTAP00000015955-D1_GRUNN,ENSBTAT00000027255_BOVIN,ENSMUST00000071391_MOUSE,PHO00009669_CHIRU,ENSBTAP00000009016-D2_GRUNN,ENSBTAT00000018130_BOVIN,Muntiacus_muntjak_CD69_10002072_MUNTJ,ENSMUST00000032207_MOUSE,ENSBTAT00000009016_BOVIN,ENSRNOT00000009594_RATTU,PHO00021066_C…
TAAR4,TAAR8,TAAR6,TAAR7A,TAAR5,TAAR2,TAAR1	GO:0007186; G-protein coupled receptor protein signaling pathway; Biological Process.GO:0016021; integral to membrane; Cellular Component	11	10	11	7	12	18	10	6	3	0	9	9	11	5	16	15	ENSECAT00000006100_HORSE,Deer_GLEAN_10001618_DAVID,SHEEP_ENSP00000275198-D8_SHEEP,ENSSSCP00000004520_SWINE,GOAT_ENSP00000424607-D6_GOATS,ENSMUST00000041180_MOUSE,SHEEP_ENSP00000275198-D9_SHEEP,ENSECAT00000005701_HORSE,ENSP00000275198-D9_GRUNN,ENSSSCP00000004522_SWINE,ENST00000258034_HUMAN,ENSMUST00000079134_MOUSE,Giraffe_Taar4_10016547_GIRAF,ENSRNOT00000051416_RATTU,ENSMUST00000057080_MOUSE,Deer_…
TSPYL1,TSPYL6,TSPYL5,SET,TSPYL4,TSPY10,TSPY4,TSPY8,TSPY2,TSPY1,TSPY3	GO:0005634; nucleus; Cellular Component.GO:0006334; nucleosome assembly; Biological Process	12	4	5	9	13	21	7	9	5	9	4	5	5	11	9	5	Muntiacus_muntjak_TSPYL4_10023547_MUNTJ,ENSBTAT00000047761_BOVIN,ENSBTAT00000002595_BOVIN,Giraffe_TSPYL1_10020600_GIRAF,ENSRNOT00000005239_RATTU,ENSBTAT00000056995_BOVIN,ENSBTAP00000044937-D5_GRUNN,ENSP00000408943-D4_GRUNN,BACU000085_WHALE,ENST00000368608_HUMAN,GOAT_ENSBTAP00000015371_GOATS,ENSBTAT00000012028_BOVIN,ENSBTAT00000048029_BOVIN,Oryx_gazella_TSPYL5_10021235_GAZEL,PHO00001595_CHIRU,ENSB…
KLHL18,KLHL7,KLHL30,KLHL14,KLHL3,KLHL29,KLHL6,KLHL21,GAN,KLHL24,KLHL23,IVNS1ABP,KLHL32,KLHL35,KLHL4,IPP,KLHL12,KLHL5,KLHL10,KLHL20,KLHL33,KLHL31,KLHL11,KBTBD3,KLHL9,KLHL8,KLHL13,KLHL38,KLHL34,KLHL1,KLHL36,ENC1,KLHL2,KEAP1,KLHL25,KLHL28,KLHL15,KLHL22,KLHL17	GO:0005515; protein binding; Molecular Function	38	37	37	12	40	39	35	11	12	30	38	33	36	39	40	40	PHO00014027_CHIRU,Deer_GLEAN_10011794_DAVID,BACU019656_WHALE,BACU007406_WHALE,PHO00014302_CHIRU,KB016932.1_cdsid_EPY82310.1_CAMEL,SHEEP_ENSP00000351933_SHEEP,GOAT_ENSBTAP00000031351_GOATS,ENSMUST00000023509_MOUSE,ENSBTAT00000036408_BOVIN,ENSSSCP00000002904_SWINE,ENSP00000317442-D1_GRUNN,ENSSSCP00000004686_SWINE,SHEEP_ENSP00000424131_SHEEP,Muntiacus_muntjak_KLHL24_10020494_MUNTJ,Deer_GLEAN_1000427…
LAIR2,LAIR1	NA	1	0	2	1	2	5	0	1	1	2	3	2	1	2	1	1	ENSSSCP00000003549_SWINE,BACU009033_WHALE,ENSSSCP00000022877_SWINE,ENSP00000343366-D19_GRUNN,PHO00004490_CHIRU,BACU009065_WHALE,ENSBTAP00000036831-D1_GRUNN,ENSECAT00000010616_HORSE,ENSBTAT00000054607_BOVIN,GOAT_ENSBTAP00000005286_GOATS,ENSSSCP00000003552_SWINE,Muntiacus_muntjak_LAIR2_10003631_MUNTJ,ENSBTAT00000036984_BOVIN,ENSBTAT00000054752_BOVIN,ENSBTAT00000054507_BOVIN,ENST00000301202_HUMAN,go…
LILRB4,LILRA2,LILRB5,LILRA6,NCR1,GP6,KIR3DL1,LILRB3,FCAR,LILRA5,KIR2DL4,KIR2DL1,LILRB1,LILRA3,KIR3DX1,KIR3DL3,KIR3DL2,LILRA1,KIR2DL3,LILRA4,LILRB2	NA	10	10	12	21	16	30	7	13	10	3	20	7	16	21	10	12	GOAT_ENSP00000394922_GOATS,Muntiacus_muntjak_LILRA5_10009671_MUNTJ,GOAT_ENSBTAP00000028085_GOATS,ENSBTAP00000047561-D5_GRUNN,Deer_GLEAN_10000376_DAVID,Deer_GLEAN_10001778_DAVID,ENSBTAT00000005286_BOVIN,ENSECAT00000012350_HORSE,ENSMUST00000006792_MOUSE,ENSRNOT00000064104_RATTU,KB017477.1_cdsid_EPY77351.1_CAMEL,ENSSSCP00000021796_SWINE,Giraffe_LILRB4_10000186_GIRAF,PHO00004493_CHIRU,ENST00000291633…
MAGEA13P,MAGEB1,MAGEB3,MAGEB4,MAGEB16,MAGEB10,MAGEA10,MAGEB18,MAGEE2,NDNL2,NDN,RPS3A,MAGEF1,MAGEA1,MAGEB5,MAGEB6,MAGEA12,MAGEE1,MAGEB17,MAGEA6,MAGEA2,MAGEA9,MAGEA8,MAGEC2,MAGEA3,MAGEA2B,MAGEA11,MAGEA9B,MAGEB2,MAGEA4	GO:0003723; RNA binding; Molecular Function.GO:0003735; structural constituent of ribosome; Molecular Function.GO:0005622; intracellular; Cellular Component.GO:0005840; ribosome; Cellular Component.GO:0006412; translation; Biological Process.NA	26	20	27	22	35	41	33	24	28	18	16	17	18	28	27	28	BACU011786_WHALE,PHO00014407_CHIRU,ENSP00000404328-D7_GRUNN,ENST00000356790_HUMAN,GOAT_ENSP00000368315-D3_GOATS,ENSSSCP00000012975_SWINE,Oryx_gazella_NDNL2_10018154_GAZEL,Muntiacus_muntjak_MAGEA10_10008324_MUNTJ,GOAT_ENSP00000244096_GOATS,Deer_GLEAN_10003037_DAVID,goat_GLEAN_10012532_GOATS,PHO00015292_CHIRU,BACU007906_WHALE,PHO00011862_CHIRU,ENSRNOT00000065450_RATTU,SHEEP_ENSP00000404328-D2_SHEEP…
HSFY1,HSFX1,HSFY2,HSFX2	NA	0	0	0	0	3	5	4	0	1	0	1	0	2	4	1	1	Giraffe_HSFY1_10000188_GIRAF,ENST00000309834_HUMAN,Deer_GLEAN_10000284_DAVID,ENST00000370416_HUMAN,ENSSSCP00000013539_SWINE,ENST00000344884_HUMAN,ENSP00000410851-D3_GRUNN,ENSMUST00000062085_MOUSE,ENSRNOT00000058831_RATTU,ENSP00000306472-D2_GRUNN,Deer_GLEAN_10000476_DAVID,Deer_GLEAN_10000626_DAVID,ENSBTAT00000066080_BOVIN,ENSBTAT00000053282_BOVIN,ENSECAT00000009196_HORSE,ENST00000524178_HUMAN,ENSE…
ADAM21,ADAM20,ADAM11,ADAM28,ADAM7,ADAM12,ADAM9,ADAM22,ADAM1A,ADAM29,ADAM15,ADAM19,ADAM18,ADAM8,ADAM23,ADAM33,ADAM30,ADAM25,ADAM5,ADAM32,ADAM2	GO:0004222; metalloendopeptidase activity; Molecular Function.GO:0006508; proteolysis; Biological Process.GO:0008270; zinc ion binding; Molecular Function.GO:0003676; nucleic acid binding; Molecular Function.GO:0016020; membrane; Cellular Component.GO:0006357; regulation of transcription from RNA polymerase II promoter; Biological Process.GO:0016455; RNA polymerase II transcription mediator activ…	27	22	22	21	31	30	24	20	20	23	29	14	20	17	25	32	KB017334.1_cdsid_EPY78217.1_CAMEL,ENSBTAP00000002276-D1_GRUNN,Giraffe_ADAM21_10019929_GIRAF,BACU007438_WHALE,ENSRNOT00000008367_RATTU,PHO00018078_CHIRU,Giraffe_ADAM20_10019700_GIRAF,KB019998.1_cdsid_EPY72666.1_CAMEL,Giraffe_ADAM11_10006076_GIRAF,SHEEP_ENSBTAP00000023197_SHEEP,ENSSSCP00000016751_SWINE,Muntiacus_muntjak_ADAM20_10019790_MUNTJ,Oryx_gazella_ADAM15_10012580_GAZEL,ENSBTAT00000016524_BOV…
HIGD1C,HIGD2A,HIGD1A,HIGD1B,HIGD2B	NA	4	4	4	4	13	9	5	3	4	9	3	1	4	5	5	3	BACU019013_WHALE,ENSBTAT00000022251_BOVIN,ENST00000274787_HUMAN,ENSBTAP00000042422-D9_GRUNN,SHEEP_ENSP00000398064_SHEEP,ENSSSCP00000018379_SWINE,ENSBTAP00000046387-D10_GRUNN,ENSBTAP00000046387-D1_GRUNN,PHO00020749_CHIRU,ENSBTAT00000044991_BOVIN,ENSSSCP00000027136_SWINE,ENSECAT00000024819_HORSE,ENSBTAT00000064599_BOVIN,ENSRNOT00000004016_RATTU,ENSECAT00000011355_HORSE,Deer_GLEAN_10005663_DAVID,PHO…
KRTAP12-2,KRTAP12-3,KRTAP12-1,KRTAP12-4	NA.GO:0045095; keratin filament; Cellular Component	1	2	2	3	4	4	3	0	0	0	0	0	4	4	3	5	GOAT_ENSBTAP00000024766-D2_GOATS,Oryx_gazella_KRTAP12-2_10016487_GAZEL,ENST00000546091_HUMAN,ENSECAT00000014442_HORSE,GOAT_ENSP00000375476_GOATS,ENSBTAP00000024766-D4_GRUNN,ENSMUST00000092370_MOUSE,Oryx_gazella_KRTAP12-2_10001478_GAZEL,ENSRNOT00000001635_RATTU,ENSECAT00000015755_HORSE,ENSBTAP00000024766-D3_GRUNN,ENSRNOT00000045125_RATTU,Deer_GLEAN_10013677_DAVID,ENSBTAT00000063461_BOVIN,ENSBTAT00…
KRTAP9-7,KRTAP4-7,KRTAP4-1,KRTAP4-2,KRTAP4-4,AC100808.7,KRTAP9-3,KRTAP4-11,KRTAP4-8,KRTAP4-5,KRTAP4-6,KRTAP9-9,KRTAP9-2,KRTAP4-3,KRTAP4-9,KRTAP9-6,KRTAP9-4,KRTAP9-8,KRTAP9-1	NA.GO:0045095; keratin filament; Cellular Component	7	5	6	3	8	8	1	1	0	0	0	6	2	19	10	24	PHO00010496_CHIRU,ENST00000458321_HUMAN,ENSP00000381488-D5_GRUNN,KE544080.1_cdsid_EPY72332.1_CAMEL,Muntiacus_muntjak_KRTAP4-1_10010195_MUNTJ,ENSBTAT00000043148_BOVIN,ENSMUST00000104929_MOUSE,ENSP00000366950-D3_GRUNN,ENSBTAT00000055532_BOVIN,ENST00000390661_HUMAN,GOAT_ENSP00000334922-D9_GOATS,PHO00010582_CHIRU,ENST00000440582_HUMAN,ENSMUST00000105054_MOUSE,ENST00000411528_HUMAN,ENSMUST00000092695_…
NA	NA	0	6	2	0	64	0	0	0	0	0	0	0	0	0	0	0	ENSBTAP00000035721-D55_GRUNN,ENSBTAP00000035721-D63_GRUNN,ENSBTAP00000035721-D64_GRUNN,ENSBTAP00000035721-D75_GRUNN,ENSBTAP00000035721-D17_GRUNN,ENSBTAP00000035721-D36_GRUNN,ENSBTAP00000035721-D72_GRUNN,ENSBTAP00000035721-D28_GRUNN,ENSBTAP00000035721-D23_GRUNN,ENSBTAP00000035721-D83_GRUNN,ENSBTAP00000035721-D53_GRUNN,ENSBTAP00000035721-D88_GRUNN,sheep_GLEAN_10011354_SHEEP,ENSBTAP00000035721-D34_G…
IGHV3-66,IGHV3-15,IGHV1-69,IGHV1-58,IGHV2OR16-5,IGHV4-61,IGHV3-49,IGHV1-46,IGHV2-5,IGHV3-35,IGHV1-45,IGHV1-18,IGHV3-9,IGHV3-48,IGHV4-34,AC140658.1,AC142086.2,IGHV3-20,IGHV3-38,IGHV3-33,IGHV2-70,IGHV6-1,IGHV4-59,IGHV3-72,IGHV2-26,IGHV3-64,AC142381.1,IGHV3-30,IGHV5-51,IGHV1-8,AC142381.2,IGHV3-13,IGHV3-7,IGHV3OR16-8,AC034105.1,IGHV4-4,IGHV4-28,IGHV3-16,IGHV3-73,IGHV3-21,IGHV4-39,IGHV3-23,IGHV3-43,IG…	NA	4	1	4	6	12	9	4	2	7	4	0	7	4	51	98	76	ENSBTAT00000066127_BOVIN,ENSRNOT00000068561_RATTU,ENSRNOT00000042987_RATTU,ENSRNOT00000066399_RATTU,KE541049.1_cdsid_EPY72393.1_CAMEL,GOAT_ENSP00000375039_GOATS,ENSRNOT00000064608_RATTU,ENSRNOT00000045885_RATTU,ENST00000390632_HUMAN,ENST00000390603_HUMAN,ENSMUST00000103508_MOUSE,ENSMUST00000103539_MOUSE,ENST00000390633_HUMAN,ENSMUST00000103505_MOUSE,ENST00000390628_HUMAN,ENSBTAT00000064623_BOVIN,…
TCRA,TRAV21,TRAV35,TRAV41,TRAV25	NA	26	6	13	17	41	36	28	25	1	6	17	6	35	4	91	39	ENSBTAT00000053098_BOVIN,ENSBTAP00000017034-D7_GRUNN,ENSMUST00000103603_MOUSE,PHO00006194_CHIRU,Oryx_gazella_TCRA_10000457_GAZEL,ENSRNOT00000060278_RATTU,ENSBTAT00000065812_BOVIN,ENSBTAT00000064311_BOVIN,ENSRNOT00000060291_RATTU,ENSSSCP00000020563_SWINE,ENSRNOT00000064158_RATTU,ENSRNOT00000065415_RATTU,ENSECAT00000023398_HORSE,ENSRNOT00000060397_RATTU,BACU008618_WHALE,ENSMUST00000103659_MOUSE,ENS…
NA	NA	16	8	16	16	26	27	14	20	2	1	12	2	26	0	58	17	PHO00006184_CHIRU,ENSBTAT00000050022_BOVIN,Muntiacus_muntjak_NA_10000575_MUNTJ,ENSRNOT00000038303_RATTU,goat_GLEAN_10000511_GOATS,SHEEP_ENSBTAP00000019860_SHEEP,ENSRNOT00000048093_RATTU,Giraffe_NA_10007947_GIRAF,ENSRNOT00000068209_RATTU,Oryx_gazella_NA_10000331_GAZEL,ENSRNOT00000067131_RATTU,ENSSSCP00000020886_SWINE,Muntiacus_muntjak_NA_10002422_MUNTJ,PHO00017168_CHIRU,KB017601.1_cdsid_EPY76529.1…
V-TCR,TCRB,TRBV12-3,TRBV23OR9-2,TRBV21OR9-2	NA	27	27	29	12	37	21	16	16	15	6	5	9	25	2	4	6	sheep_GLEAN_10000160_SHEEP,ENSBTAP00000050023-D3_GRUNN,ENSBTAT00000053610_BOVIN,ENSBTAP00000048427-D37_GRUNN,sheep_GLEAN_10000149_SHEEP,SHEEP_ENSP00000374915-D4_SHEEP,Giraffe_NA_10001250_GIRAF,ENSECAT00000000871_HORSE,goat_GLEAN_10001021_GOATS,PHO00019524_CHIRU,PHO00019506_CHIRU,SHEEP_ENSBTAP00000052911-D2_SHEEP,Muntiacus_muntjak_NA_10003095_MUNTJ,PHO00019538_CHIRU,Giraffe_V-TCR_10001243_GIRAF,SH…
NA	NA	10	10	0	0	60	0	0	0	0	1	0	0	200	0	2	2	ENSBTAP00000051259-D89_GRUNN,ENSECAT00000008397_HORSE,ENSECAT00000008439_HORSE,ENSBTAP00000051671-D35_GRUNN,ENSECAT00000017997_HORSE,ENSBTAP00000051671-D17_GRUNN,ENSECAT00000000621_HORSE,ENSECAT00000020263_HORSE,ENSECAT00000011947_HORSE,ENSECAT00000007416_HORSE,ENSECAT00000017776_HORSE,ENSECAT00000006226_HORSE,ENSECAT00000016302_HORSE,ENSECAT00000009935_HORSE,PHO00014738_CHIRU,ENSECAT00000024347_…
SETMAR	NA	37	6	8	0	43	52	0	0	0	1	0	0	0	1	0	0	PHO00011326_CHIRU,ENSBTAP00000053094-D86_GRUNN,PHO00008438_CHIRU,PHO00005610_CHIRU,ENSBTAP00000005410-D46_GRUNN,PHO00017503_CHIRU,ENSBTAT00000063661_BOVIN,ENSBTAT00000009396_BOVIN,PHO00010248_CHIRU,ENSBTAP00000009043-D64_GRUNN,ENSBTAP00000011250-D1_GRUNN,ENSBTAT00000063587_BOVIN,ENSBTAP00000033501-D1_GRUNN,ENSBTAP00000020978-D18_GRUNN,ENSBTAT00000037486_BOVIN,ENSBTAP00000051330-D49_GRUNN,PHO00013…
AL158821.1	NA	0	0	0	0	36	0	0	0	0	3	1	0	3	1	0	0	ENSP00000392188-D5_GRUNN,BACU007772_WHALE,ENSP00000392188-D85_GRUNN,ENSECAT00000013798_HORSE,ENSP00000392188-D8_GRUNN,ENSP00000392188-D14_GRUNN,ENSP00000392188-D17_GRUNN,ENSP00000392188-D20_GRUNN,ENSP00000392188-D52_GRUNN,ENSP00000392188-D25_GRUNN,ENSP00000392188-D41_GRUNN,ENSP00000392188-D72_GRUNN,ENSBTAP00000048967-D99_GRUNN,ENSP00000392188-D60_GRUNN,ENSP00000392188-D47_GRUNN,ENSSSCP00000026935…
TAS2R41,TAS2R60,TAS2R16,TAS2R40,TAS2R5,TAS2R3,TAS2R39,TAS2R31,TAS2R50,TAS2R7,TAS2R14,TAS2R9,TAS2R10,TAS2R20,TAS2R46,TAS2R8,TAS2R19,TAS2R13,TAS2R4,TAS2R38,TAS2R42,TAS2R1,TAS2R43,TAS2R30	GO:0004930; G-protein coupled receptor activity; Molecular Function.GO:0007186; G-protein coupled receptor protein signaling pathway; Biological Process.GO:0016021; integral to membrane; Cellular Component.GO:0050909; sensory perception of taste; Biological Process	19	20	24	4	28	15	7	4	1	1	10	5	15	24	36	36	ENSMUST00000069268_MOUSE,ENSRNOT00000024048_RATTU,PHO00013727_CHIRU,GOAT_ENSBTAP00000040608-D2_GOATS,ENSBTAP00000049472-D3_GRUNN,ENSECAT00000023867_HORSE,PHO00020052_CHIRU,ENSBTAT00000043004_BOVIN,SHEEP_ENSBTAP00000040606-D5_SHEEP,SHEEP_ENSBTAP00000040608_SHEEP,ENST00000390675_HUMAN,ENSRNOT00000040828_RATTU,GOAT_ENSP00000386201_GOATS,SHEEP_ENSBTAP00000042858_SHEEP,ENSRNOT00000007435_RATTU,ENSRNOT…
PAG2,PGA,PAG,PAG1,CYM,REN,PGC,CTSD,PGA3,PGA5,PGA4,CTSE	GO:0004190; aspartic-type endopeptidase activity; Molecular Function.GO:0006508; proteolysis; Biological Process.GO:0009607; response to biotic stimulus; Biological Process.GO:0016021; integral to membrane; Cellular Component	17	39	40	22	52	56	41	29	19	7	15	7	12	7	7	7	GOAT_ENSBTAP00000030228-D19_GOATS,ENSSSCP00000013931_SWINE,ENSSSCP00000013924_SWINE,GOAT_ENSBTAP00000030448-D33_GOATS,ENSBTAP00000030173-D15_GRUNN,ENST00000325558_HUMAN,SHEEP_ENSBTAP00000030228_SHEEP,Giraffe_PAG2_10000171_GIRAF,SHEEP_ENSBTAP00000030448-D8_SHEEP,Deer_GLEAN_10000310_DAVID,Deer_GLEAN_10000150_DAVID,ENSSSCP00000023039_SWINE,ENSSSCP00000013930_SWINE,Muntiacus_muntjak_PGC_10006737_MUNT…
FGF18,NPM3,NPM1,NPM2	GO:0003676; nucleic acid binding; Molecular Function.GO:0008083; growth factor activity; Molecular Function	4	8	6	1	6	5	2	2	1	7	4	1	3	3	11	4	goat_GLEAN_10013034_GOATS,sheep_GLEAN_10011050_SHEEP,goat_GLEAN_10008274_GOATS,SHEEP_ENSBTAP00000020363_SHEEP,ENSMUST00000093201_MOUSE,BACU003681_WHALE,ENSRNOT00000025575_RATTU,ENSMUST00000062629_MOUSE,sheep_GLEAN_10006748_SHEEP,ENSBTAT00000021730_BOVIN,ENSRNOT00000023963_RATTU,BACU019443_WHALE,Muntiacus_muntjak_NPM1_10006864_MUNTJ,ENSBTAT00000020363_BOVIN,ENSBTAT00000063487_BOVIN,goat_GLEAN_1001…
UBE2F,UBE2L6,UBE2E3,UBE2G2,UBE2I,UBE2G1,UBE2K,UBE2T,UBE2N,UBE2A,UBE2C,UBE2B,UBE2H,UBE2E1,UBE2L3,CDC34,UBE2M,UBE2R2,UBE2W,UBE2D4,UBE2S,UBE2D2,UBE2NL,UBE2D1,UBE2E2,UBE2D3	GO:0019787; small conjugating protein ligase activity; Molecular Function.GO:0043687; post-translational protein modification; Biological Process.GO:0051246; regulation of protein metabolic process; Biological Process.GO:0004842; ubiquitin-protein ligase activity; Molecular Function.GO:0005524; ATP binding; Molecular Function.GO:0016567; protein ubiquitination; Biological Process.GO:0006464; prot…	25	25	27	22	29	37	16	19	19	26	23	11	25	26	31	33	ENSBTAP00000005220-D1_GRUNN,Giraffe_UBE2F_10005362_GIRAF,sheep_GLEAN_10017357_SHEEP,ENSRNOT00000046159_RATTU,ENSRNOT00000040086_RATTU,ENSECAT00000015457_HORSE,Deer_GLEAN_10015855_DAVID,ENST00000287156_HUMAN,ENSBTAT00000008394_BOVIN,PHO00019804_CHIRU,ENSRNOT00000045603_RATTU,SHEEP_ENSP00000316176_SHEEP,Deer_GLEAN_10015420_DAVID,BACU011380_WHALE,KB017245.1_cdsid_EPY78772.1_CAMEL,ENSECAT00000020216_…
ULBP3,ULBP1,RAET1E,RAET1G,ULBP2,RAET1L	GO:0006955; immune response; Biological Process.GO:0016020; membrane; Cellular Component.GO:0019882; antigen processing and presentation; Biological Process.GO:0042612; MHC class I protein complex; Cellular Component	6	7	9	4	10	15	6	7	7	0	5	0	6	6	0	0	Muntiacus_muntjak_ULBP1_10001147_MUNTJ,PHO00008011_CHIRU,ENSBTAP00000046694-D2_GRUNN,GOAT_ENSBTAP00000011321_GOATS,ENSBTAT00000002400_BOVIN,ENSBTAP00000048357-D1_GRUNN,Deer_GLEAN_10001975_DAVID,Deer_GLEAN_10001973_DAVID,Muntiacus_muntjak_ULBP1_10000444_MUNTJ,ENSBTAT00000064751_BOVIN,ENSBTAT00000034023_BOVIN,ENST00000399812_HUMAN,Oryx_gazella_ULBP3_10000432_GAZEL,ENSBTAT00000037567_BOVIN,Deer_GLEA…
RPS23	GO:0003735; structural constituent of ribosome; Molecular Function.GO:0005622; intracellular; Cellular Component.GO:0005840; ribosome; Cellular Component.GO:0006412; translation; Biological Process	3	2	3	1	8	4	2	2	1	2	3	2	1	1	4	3	ENSMUST00000168454_MOUSE,ENST00000510210_HUMAN,ENSBTAT00000043597_BOVIN,ENSMUST00000097570_MOUSE,ENSRNOT00000037018_RATTU,ENSBTAP00000046926-D11_GRUNN,ENSBTAP00000049786-D19_GRUNN,ENSRNOT00000046342_RATTU,Deer_GLEAN_10023588_DAVID,Muntiacus_muntjak_Rps23_10021418_MUNTJ,ENSSSCP00000015028_SWINE,ENSBTAP00000024424-D4_GRUNN,GOAT_ENSBTAP00000002603_GOATS,ENSBTAT00000024424_BOVIN,ENSBTAP00000048782-D1…
PIGT,TKDP1,SPINT3	GO:0004867; serine-type endopeptidase inhibitor activity; Molecular Function.GO:0016021; integral to membrane; Cellular Component.GO:0042765; GPI-anchor transamidase complex; Cellular Component	12	5	7	3	14	9	7	3	3	2	5	2	1	1	2	1	goat_GLEAN_10010718_GOATS,ENSBTAT00000018539_BOVIN,Oryx_gazella_TKDP1_10009700_GAZEL,PHO00003723_CHIRU,ENSBTAP00000023042-D1_GRUNN,SHEEP_ENSBTAP00000023042-D4_SHEEP,PHO00003717_CHIRU,ENSBTAP00000018539-D2_GRUNN,ENSSSCP00000007895_SWINE,Giraffe_PIGT_10020765_GIRAF,Deer_GLEAN_10001714_DAVID,ENST00000217428_HUMAN,Deer_GLEAN_10001712_DAVID,Giraffe_NA_10020764_GIRAF,Deer_GLEAN_10003441_DAVID,ENSSSCP00…
TKDP1	NA	2	2	3	0	5	2	1	1	0	0	0	0	0	0	0	0	ENSBTAP00000018528-D3_GRUNN,Muntiacus_muntjak_TKDP1_10015705_MUNTJ,GOAT_ENSBTAP00000018528-D9_GOATS,SHEEP_ENSBTAP00000049575_SHEEP,ENSBTAT00000066021_BOVIN,ENSBTAP00000052527-D3_GRUNN,SHEEP_ENSBTAP00000052527-D3_SHEEP,ENSBTAP00000049575-D1_GRUNN,ENSBTAT00000019075_BOVIN,PHO00003766_CHIRU,Deer_GLEAN_10000420_DAVID,PHO00003763_CHIRU,ENSBTAP00000018528-D1_GRUNN,GOAT_ENSBTAP00000049575_GOATS,GOAT_ENS…
IFNW1,IFNT,IFNB2,IFNB3,IFNE,IFNT11,IFNK,IFNT2,IFNT6,IFNB1	GO:0005126; cytokine receptor binding; Molecular Function.GO:0005576; extracellular region; Cellular Component.GO:0006952; defense response; Biological Process	23	18	20	27	40	39	30	29	19	10	38	9	24	17	18	31	ENSP00000369560-D12_GRUNN,ENSBTAT00000066275_BOVIN,ENSMUST00000055671_MOUSE,ENSSSCP00000028855_SWINE,Giraffe_NA_10000224_GIRAF,ENSMUST00000105146_MOUSE,GOAT_ENSBTAP00000049539-D2_GOATS,ENSMUST00000102808_MOUSE,PHO00017162_CHIRU,ENST00000380229_HUMAN,ENSBTAT00000054467_BOVIN,SHEEP_ENSBTAP00000045034-D2_SHEEP,Oryx_gazella_IFNB2_10000181_GAZEL,Deer_GLEAN_10000606_DAVID,Muntiacus_muntjak_IFNW1_100036…
FAM32A	GO:0005179; hormone activity; Molecular Function.GO:0005576; extracellular region; Cellular Component.NA	1	1	3	1	7	7	3	2	2	4	1	1	1	1	2	2	ENSBTAT00000052460_BOVIN,Giraffe_FAM32A_10007271_GIRAF,yakA19521_GRUNN,ENSBTAP00000038660-D2_GRUNN,Muntiacus_muntjak_FAM32A_10019060_MUNTJ,BACU018416_WHALE,ENSBTAP00000051167-D7_GRUNN,ENSBTAP00000034554-D1_GRUNN,ENSRNOT00000019556_RATTU,ENSBTAP00000040465-D5_GRUNN,ENSMUST00000059110_MOUSE,ENSMUST00000003123_MOUSE,ENSSSCP00000014729_SWINE,Oryx_gazella_FAM32A_10006003_GAZEL,BACU015703_WHALE,ENSBTAP…
NA	NA	5	2	1	1	9	6	0	4	1	0	2	0	0	0	0	0	ENSSSCP00000013527_SWINE,Giraffe_NA_10001818_GIRAF,ENSBTAP00000044913-D22_GRUNN,ENSBTAT00000064560_BOVIN,Muntiacus_muntjak_NA_10000036_MUNTJ,PHO00013211_CHIRU,ENSBTAT00000065596_BOVIN,Muntiacus_muntjak_NA_10007771_MUNTJ,PHO00017778_CHIRU,ENSBTAP00000049863-D14_GRUNN,Oryx_gazella_NA_10002327_GAZEL,Muntiacus_muntjak_NA_10000030_MUNTJ,ENSBTAP00000051434-D5_GRUNN,ENSBTAT00000063367_BOVIN,ENSBTAP00000…
CT47A1,CT47B1	NA	0	0	0	0	3	4	0	2	2	0	2	0	0	0	0	0	ENSSSCP00000013399_SWINE,ENSP00000391318-D1_GRUNN,ENSP00000414253-D1_GRUNN,ENSBTAT00000053470_BOVIN,ENSBTAT00000066070_BOVIN,ENSBTAT00000064673_BOVIN,ENSSSCP00000013429_SWINE,ENSBTAT00000065818_BOVIN,ENSBTAP00000048583-D1_GRUNN,Muntiacus_muntjak_CT47B1_10015208_MUNTJ,Muntiacus_muntjak_CT47A1_10014539_MUNTJ,Giraffe_NA_10003490_GIRAF,Giraffe_CT47A1_10001050_GIRAF
RPL36A,RPL36AL,RP1-164F3.9	GO:0003735; structural constituent of ribosome; Molecular Function.GO:0005622; intracellular; Cellular Component.GO:0005840; ribosome; Cellular Component.GO:0006412; translation; Biological Process.NA	3	3	2	3	9	6	1	0	2	4	5	0	1	3	9	2	ENST00000298289_HUMAN,BACU009095_WHALE,ENSRNOT00000043603_RATTU,ENSRNOT00000055639_RATTU,Oryx_gazella_Rpl36a_10016520_GAZEL,ENSBTAT00000048087_BOVIN,ENSP00000381900-D15_GRUNN,ENSBTAP00000053140-D3_GRUNN,BACU020005_WHALE,ENSBTAP00000045188-D15_GRUNN,PHO00015313_CHIRU,GOAT_ENSP00000346012_GOATS,ENSBTAT00000063926_BOVIN,ENSBTAP00000046898-D7_GRUNN,Deer_GLEAN_10020577_DAVID,ENSECAT00000016248_HORSE,E…
GLRX2,GLRX	GO:0009055; electron carrier activity; Molecular Function.GO:0015035; protein disulfide oxidoreductase activity; Molecular Function.GO:0045454; cell redox homeostasis; Biological Process	2	2	4	6	7	7	1	4	1	2	3	3	2	2	3	2	BACU017790_WHALE,ENST00000505427_HUMAN,GOAT_ENSBTAP00000021249_GOATS,ENSBTAP00000021249-D1_GRUNN,ENSMUST00000022082_MOUSE,Oryx_gazella_GLRX_10013113_GAZEL,Oryx_gazella_GLRX2_10011239_GAZEL,KB017711.1_cdsid_EPY75821.1_CAMEL,ENST00000367440_HUMAN,PHO00009873_CHIRU,BACU018529_WHALE,goat_GLEAN_10003882_GOATS,Oryx_gazella_GLRX_10002385_GAZEL,ENSBTAT00000044267_BOVIN,ENSSSCP00000015066_SWINE,ENSP000002…
RPS27,RPS27L	NA	3	3	4	0	9	4	10	0	0	0	2	2	2	2	2	4	PHO00015617_CHIRU,ENSMUST00000171685_MOUSE,PHO00010170_CHIRU,ENSECAT00000017254_HORSE,SHEEP_ENSP00000357555_SHEEP,Deer_GLEAN_10015206_DAVID,ENSBTAT00000000975_BOVIN,ENSP00000357555-D2_GRUNN,ENSBTAP00000052430-D14_GRUNN,ENSMUST00000170122_MOUSE,ENSBTAT00000057552_BOVIN,ENST00000368567_HUMAN,ENSMUST00000053150_MOUSE,ENSRNOT00000022897_RATTU,PHO00009654_CHIRU,GOAT_ENSBTAP00000052370_GOATS,ENSBTAP000…
GBP4,GBP1,GBP6,GBP7,GBP5,GBP2,GBP3	GO:0003924; GTPase activity; Molecular Function.GO:0005525; GTP binding; Molecular Function.GO:0006955; immune response; Biological Process.GO:0003743; translation initiation factor activity; Molecular Function.GO:0005515; protein binding; Molecular Function.GO:0006413; translational initiation; Biological Process.GO:0008270; zinc ion binding; Molecular Function.GO:0009058; biosynthetic process; …	5	5	7	10	13	15	6	7	4	3	7	7	4	7	10	11	Giraffe_GBP4_10015087_GIRAF,ENSSSCP00000007378_SWINE,ENSBTAP00000019785-D2_GRUNN,Oryx_gazella_GBP7_10000274_GAZEL,ENSBTAP00000019785-D1_GRUNN,ENSRNOT00000040856_RATTU,ENSBTAP00000020043-D1_GRUNN,ENSMUST00000050011_MOUSE,ENSMUST00000029935_MOUSE,ENSBTAT00000033527_BOVIN,PHO00012330_CHIRU,ENSMUST00000090127_MOUSE,ENSECAT00000018799_HORSE,Oryx_gazella_GBP1_10005521_GAZEL,ENST00000544311_HUMAN,ENSSSC…
MT2,MT1E,MT1M,MT1B,MT1G,MT1H,MT1F,MT2A,MT1A,MT1X,MT1CP	GO:0046872; metal ion binding; Molecular Function	1	3	1	1	5	4	0	2	1	6	4	1	5	10	5	2	ENST00000379818_HUMAN,ENST00000334346_HUMAN,ENSRNOT00000047663_RATTU,SHEEP_ENSBTAP00000034269_SHEEP,ENST00000444837_HUMAN,ENSBTAT00000002088_BOVIN,ENSBTAP00000022462-D1_GRUNN,ENSSSCP00000025883_SWINE,ENST00000332374_HUMAN,ENSRNOT00000057898_RATTU,ENSBTAP00000002092-D2_GRUNN,ENST00000334350_HUMAN,ENSBTAT00000034373_BOVIN,ENST00000245185_HUMAN,PHO00016966_CHIRU,ENST00000306061_HUMAN,ENST00000290705…
DEFB9,DEFB1,DEFB3	NA.GO:0005576; extracellular region; Cellular Component.GO:0006952; defense response; Biological Process	2	2	2	2	10	12	0	3	0	0	0	0	0	0	0	0	ENSBTAP00000044857-D4_GRUNN,ENSBTAT00000065980_BOVIN,GOAT_ENSBTAP00000040081_GOATS,ENSBTAP00000046999-D2_GRUNN,ENSBTAP00000047159-D1_GRUNN,SHEEP_ENSBTAP00000019635_SHEEP,Muntiacus_muntjak_DEFB3_10000588_MUNTJ,ENSBTAP00000046543-D7_GRUNN,SHEEP_ENSBTAP00000049375_SHEEP,ENSBTAT00000063757_BOVIN,ENSBTAT00000066254_BOVIN,ENSBTAP00000046539-D4_GRUNN,ENSBTAT00000009756_BOVIN,ENSBTAT00000054965_BOVIN,ENS…
UBL5	NA.GO:0005515; protein binding; Molecular Function	3	2	3	0	2	3	2	1	0	1	1	0	1	1	1	4	GOAT_ENSBTAP00000050570_GOATS,GOAT_ENSBTAP00000052140_GOATS,PHO00001191_CHIRU,Deer_GLEAN_10004827_DAVID,Deer_GLEAN_10022978_DAVID,ENSMUST00000162303_MOUSE,ENSBTAP00000052140-D1_GRUNN,ENSSSCP00000022340_SWINE,ENSMUST00000105161_MOUSE,ENST00000358666_HUMAN,ENSBTAP00000050570-D3_GRUNN,SHEEP_ENSP00000351492_SHEEP,PHO00020689_CHIRU,ENSRNOT00000027749_RATTU,PHO00013298_CHIRU,ENSBTAT00000031821_BOVIN,EN…
COX7C	NA.GO:0004129; cytochrome-c oxidase activity; Molecular Function	1	1	2	1	5	3	0	0	0	4	2	0	0	1	1	2	GOAT_ENSBTAP00000050729_GOATS,BACU019961_WHALE,ENSSSCP00000015039_SWINE,ENSBTAT00000053207_BOVIN,BACU019962_WHALE,ENSMUST00000131011_MOUSE,ENST00000515763_HUMAN,Oryx_gazella_COX7C_10002729_GAZEL,BACU018254_WHALE,PHO00015442_CHIRU,ENSBTAP00000050729-D4_GRUNN,ENSBTAP00000050340-D2_GRUNN,goat_GLEAN_10020163_GOATS,ENSSSCP00000021630_SWINE,ENSBTAT00000056065_BOVIN,ENSBTAP00000050991-D6_GRUNN,ENSMUST00…
RPL39,RPL39L	NA	2	1	1	0	11	4	0	0	0	0	0	0	1	2	9	2	ENSP00000391684-D26_GRUNN,ENSRNOT00000051137_RATTU,GOAT_ENSP00000391684_GOATS,ENST00000361575_HUMAN,ENSRNOT00000050345_RATTU,PHO00008805_CHIRU,ENSP00000273411-D3_GRUNN,ENSRNOT00000040815_RATTU,ENSRNOT00000051564_RATTU,ENSRNOT00000047542_RATTU,ENSBTAT00000062986_BOVIN,ENSP00000397240-D15_GRUNN,ENSMUST00000115231_MOUSE,ENST00000296277_HUMAN,ENSBTAP00000052930-D12_GRUNN,ENSBTAP00000042187-D4_GRUNN,E…
TMSB4X,TMSB10,TMSB15A,TMSB4Y,TMSL4,TMSL3	NA.GO:0003779; actin binding; Molecular Function.GO:0005737; cytoplasm; Cellular Component.GO:0007010; cytoskeleton organization; Biological Process	3	2	1	2	7	8	0	1	0	6	6	1	1	6	6	6	Oryx_gazella_Tmsb4x_10015164_GAZEL,ENSRNOT00000042383_RATTU,ENSBTAP00000042213-D6_GRUNN,ENSBTAT00000007429_BOVIN,ENSRNOT00000022846_RATTU,ENSRNOT00000044354_RATTU,ENSSSCP00000024044_SWINE,ENSMUST00000127404_MOUSE,ENSMUST00000114049_MOUSE,BACU008493_WHALE,ENST00000289373_HUMAN,ENSRNOT00000055447_RATTU,ENSBTAT00000007124_BOVIN,BACU019103_WHALE,ENST00000451311_HUMAN,ENSMUST00000069803_MOUSE,ENSMUST0…
NA	NA	2	1	0	0	14	0	0	0	0	0	0	0	1	0	0	1	ENSMUST00000172100_MOUSE,ENSBTAP00000052559-D12_GRUNN,ENSBTAP00000041044-D28_GRUNN,ENSBTAP00000004095-D40_GRUNN,ENSBTAP00000037642-D19_GRUNN,ENSBTAP00000036190-D23_GRUNN,SHEEP_ENSBTAP00000045112_SHEEP,ENSBTAP00000045112-D1_GRUNN,ENSBTAP00000011244-D33_GRUNN,ENSECAT00000004465_HORSE,ENSBTAP00000041072-D3_GRUNN,ENSBTAP00000006229-D11_GRUNN,PHO00011489_CHIRU,ENSBTAP00000050197-D8_GRUNN,ENSBTAP000000…
NA	NA	2	0	0	0	4	9	0	0	0	0	0	0	0	0	0	0	ENSBTAT00000040008_BOVIN,ENSBTAT00000006882_BOVIN,PHO00019776_CHIRU,ENSBTAP00000039476-D22_GRUNN,ENSBTAT00000033844_BOVIN,ENSBTAT00000039687_BOVIN,ENSBTAT00000036205_BOVIN,ENSBTAT00000030994_BOVIN,ENSBTAP00000023584-D26_GRUNN,ENSBTAP00000006882-D21_GRUNN,ENSBTAT00000029807_BOVIN,PHO00014374_CHIRU,ENSBTAT00000063902_BOVIN,ENSBTAT00000026433_BOVIN,ENSBTAP00000039476-D1_GRUNN

## Sheet: Bovidae_contractions
Bovidae gene contractions
symbol	GO annotation	Pantholops hodgsonii	Ovis aries	Capra hircus	Oryx gazella	Bos grunniens	Bos taurus	Elaphurus davidianus	Muntiacus muntjak	Giraffa camelopardalis	Balaenoptera acutorostrata	Sus scrofa	Camelus ferus	Equus caballus	Homo sapiens	Rattus norvegicus	Mus musculus	Gene cluster
RPS20	GO:0003735; structural constituent of ribosome; Molecular Function.GO:0005622; intracellular; Cellular Component.GO:0005840; ribosome; Cellular Component.GO:0006412; translation; Biological Process	2	1	1	2	2	1	11	8	6	8	2	1	1	1	3	1	PHO00002879_CHIRU,Deer_GLEAN_10012648_DAVID,Deer_GLEAN_10007916_DAVID,BACU010830_WHALE,BACU014435_WHALE,BACU020492_WHALE,Deer_GLEAN_10023667_DAVID,Deer_GLEAN_10012897_DAVID,Deer_GLEAN_10007060_DAVID,Oryx_gazella_Rps20_10022492_GAZEL,Muntiacus_muntjak_Rps20_10009241_MUNTJ,Giraffe_Rps20_10004631_GIRAF,Giraffe_Rps20_10015398_GIRAF,PHO00011367_CHIRU,Deer_GLEAN_10018856_DAVID,Deer_GLEAN_10019601_DAVID…
TSPY1,TSPY10,TSPY3	GO:0005634; nucleus; Cellular Component.GO:0006334; nucleosome assembly; Biological Process.NA	0	0	0	0	0	0	8	0	4	1	0	1	0	0	0	0	KE537534.1_cdsid_EPY72615.1_CAMEL,Giraffe_TSPY1_10000019_GIRAF,Deer_GLEAN_10000139_DAVID,Deer_GLEAN_10000406_DAVID,Deer_GLEAN_10000181_DAVID,Deer_GLEAN_10000511_DAVID,Deer_GLEAN_10004278_DAVID,Giraffe_TSPY10_10000092_GIRAF,Giraffe_TSPY3_10000160_GIRAF,Deer_GLEAN_10011099_DAVID,BACU012499_WHALE,Deer_GLEAN_10000942_DAVID,Giraffe_TSPY10_10000259_GIRAF,Deer_GLEAN_10004276_DAVID
RPL10,RPL10L	GO:0003735; structural constituent of ribosome; Molecular Function.GO:0005622; intracellular; Cellular Component.GO:0005840; ribosome; Cellular Component.GO:0006412; translation; Biological Process.GO:0016021; integral to membrane; Cellular Component	7	17	12	9	8	5	32	18	19	9	1	10	2	2	4	3	GOAT_ENSBTAP00000000802_GOATS,KB017742.1_cdsid_EPY75684.1_CAMEL,Deer_GLEAN_10007223_DAVID,Giraffe_RPL10_10009957_GIRAF,Deer_GLEAN_10002698_DAVID,Deer_GLEAN_10003246_DAVID,KB017488.1_cdsid_EPY77248.1_CAMEL,Giraffe_RPL10_10004833_GIRAF,KB016675.1_cdsid_EQB77516.1_CAMEL,Oryx_gazella_RPL10_10005554_GAZEL,ENSBTAT00000063980_BOVIN,Giraffe_RPL10_10019836_GIRAF,yakG005112_GRUNN,Giraffe_RPL10_10012068_GIR…
NA	NA	0	0	0	0	0	0	0	6	1	0	0	1	0	0	0	0	Giraffe_NA_10017026_GIRAF,Muntiacus_muntjak_NA_10010197_MUNTJ,Muntiacus_muntjak_NA_10010202_MUNTJ,KB017127.1_cdsid_EPY79899.1_CAMEL,Muntiacus_muntjak_NA_10010201_MUNTJ,Muntiacus_muntjak_NA_10010199_MUNTJ,Muntiacus_muntjak_NA_10010200_MUNTJ,Muntiacus_muntjak_NA_10010198_MUNTJ
NA	NA	0	0	0	0	0	0	0	9	0	0	0	0	0	0	0	0	Muntiacus_muntjak_NA_10000724_MUNTJ,Muntiacus_muntjak_NA_10000232_MUNTJ,Muntiacus_muntjak_NA_10000050_MUNTJ,Muntiacus_muntjak_NA_10000296_MUNTJ,Muntiacus_muntjak_NA_10000067_MUNTJ,Muntiacus_muntjak_NA_10000703_MUNTJ,Muntiacus_muntjak_NA_10000295_MUNTJ,Muntiacus_muntjak_NA_10001391_MUNTJ,Muntiacus_muntjak_NA_10000363_MUNTJ
SSPO	NA	0	0	0	0	0	0	28	2	0	0	0	0	0	0	0	0	Deer_GLEAN_10000471_DAVID,Deer_GLEAN_10001182_DAVID,Deer_GLEAN_10000603_DAVID,Deer_GLEAN_10000358_DAVID,Deer_GLEAN_10001277_DAVID,Deer_GLEAN_10001282_DAVID,Deer_GLEAN_10000915_DAVID,Deer_GLEAN_10000835_DAVID,Deer_GLEAN_10000459_DAVID,Deer_GLEAN_10000287_DAVID,Deer_GLEAN_10000726_DAVID,Deer_GLEAN_10000363_DAVID,Deer_GLEAN_10001076_DAVID,Muntiacus_muntjak_SSPO_10000567_MUNTJ,Deer_GLEAN_10001338_DAV…

## Sheet: Bovidae_expansions
Bovidae gene expansions
symbol	GO annotation	Pantholops hodgsonii	Ovis aries	Capra hircus	Oryx gazella	Bos grunniens	Bos taurus	Elaphurus davidianus	Muntiacus muntjak	Giraffa camelopardalis	Balaenoptera acutorostrata	Sus scrofa	Camelus ferus	Equus caballus	Homo sapiens	Rattus norvegicus	Mus musculus	Gene cluster
DMBT1	GO:0005044; scavenger receptor activity; Molecular Function.GO:0016020; membrane; Cellular Component	4	3	8	3	9	2	3	3	1	2	1	3	2	0	1	0	ENSBTAP00000015890-D1_GRUNN,BACU004721_WHALE,KB018224.1_cdsid_EPY74220.1_CAMEL,GOAT_ENSBTAP00000021056-D2_GOATS,PHO00000244_CHIRU,Muntiacus_muntjak_NA_10000318_MUNTJ,ENSBTAP00000052573-D42_GRUNN,BACU015276_WHALE,PHO00017795_CHIRU,ENSECAT00000008340_HORSE,GOAT_ENSBTAP00000050425-D5_GOATS,Oryx_gazella_NA_10019141_GAZEL,PHO00000574_CHIRU,Giraffe_NA_10011800_GIRAF,GOAT_ENSBTAP00000049192-D2_GOATS,ENS…
SPADH1	NA.GO:0007338; single fertilization; Biological Process	3	3	3	0	3	3	0	2	0	0	5	0	2	0	0	0	ENSBTAP00000010565-D1_GRUNN,ENSSSCP00000003223_SWINE,GOAT_ENSBTAP00000050767_GOATS,PHO00006819_CHIRU,Muntiacus_muntjak_NA_10007338_MUNTJ,ENSSSCP00000003222_SWINE,PHO00006820_CHIRU,ENSECAT00000006360_HORSE,ENSSSCP00000003226_SWINE,ENSBTAT00000054001_BOVIN,GOAT_ENSBTAP00000010565_GOATS,SHEEP_ENSBTAP00000010565_SHEEP,SHEEP_ENSBTAP00000050767_SHEEP,ENSBTAP00000050767-D1_GRUNN,ENSSSCP00000003227_SWINE…
OR10A4,OR10C1,OR10AG1,OR10A7,OR10A5,OR10P1,OLFR9,OR10A3,OR10A6,OR10A2	GO:0004984; olfactory receptor activity; Molecular Function.GO:0007186; G-protein coupled receptor protein signaling pathway; Biological Process.GO:0016021; integral to membrane; Cellular Component	20	25	23	21	27	27	22	13	11	6	19	19	22	9	33	37	PHO00008582_CHIRU,ENSBTAT00000052282_BOVIN,ENSP00000311477-D11_GRUNN,ENSBTAP00000028258-D3_GRUNN,Deer_GLEAN_10001432_DAVID,ENSP00000320560-D92_GRUNN,ENSMUST00000071410_MOUSE,SHEEP_ENSBTAP00000053097_SHEEP,ENST00000379831_HUMAN,GOAT_ENSBTAP00000052003_GOATS,ENSBTAP00000049653-D17_GRUNN,PHO00008583_CHIRU,SHEEP_ENSBTAP00000051915-D2_SHEEP,ENSBTAP00000012751-D20_GRUNN,GOAT_ENSBTAP00000049044_GOATS,GO…
OR5T1,OLFR1052,OLFR1019,OLFR1020,OLFR1094,OR5C1,OR5AP2,OLFR1009,OR5T2,OR5W2,OR5AS1,OLFR1102,OR8U9,OR5T3,OR5AR1,OR5J2,OR5I1	GO:0004984; olfactory receptor activity; Molecular Function.GO:0007186; G-protein coupled receptor protein signaling pathway; Biological Process.GO:0016021; integral to membrane; Cellular Component	21	20	20	14	35	30	20	6	8	3	27	23	24	10	49	44	KE537625.1_cdsid_EPY72563.1_CAMEL,ENSRNOT00000050404_RATTU,PHO00021771_CHIRU,ENSRNOT00000046688_RATTU,ENSSSCP00000006229_SWINE,ENSMUST00000099839_MOUSE,ENSECAT00000006231_HORSE,SHEEP_ENSBTAP00000050673-D5_SHEEP,ENSMUST00000077471_MOUSE,KB016390.1_cdsid_EPY89598.1_CAMEL,ENSBTAT00000063042_BOVIN,ENSBTAT00000019026_BOVIN,ENSSSCP00000015394_SWINE,ENSMUST00000099867_MOUSE,KE537625.1_cdsid_EPY72558.1_C…
OR2B8P,OR2I1P,OR2W3,OR2G2,OR2B11,OR2W1,OLFR15,OR2W6P,OR2J1,OR2G6,OR2B2,OR2J3,OR2B3,OR2B6,OR2G3,OR2C3,OR2J2,OR2Y1	GO:0004984; olfactory receptor activity; Molecular Function.GO:0007186; G-protein coupled receptor protein signaling pathway; Biological Process.GO:0016021; integral to membrane; Cellular Component	42	43	46	42	42	40	41	13	17	4	46	20	46	14	36	42	Oryx_gazella_OR2B2_10010068_GAZEL,ENSBTAT00000040257_BOVIN,ENSMUST00000055324_MOUSE,Muntiacus_muntjak_OR2W6P_10003491_MUNTJ,ENSSSCP00000025793_SWINE,Muntiacus_muntjak_OR2W3_10001510_MUNTJ,SHEEP_ENSBTAP00000051832-D4_SHEEP,ENSRNOT00000029500_RATTU,Oryx_gazella_OR2G6_10004392_GAZEL,GOAT_ENSBTAP00000052593_GOATS,BACU004883_WHALE,ENSBTAT00000064377_BOVIN,Deer_GLEAN_10003714_DAVID,SHEEP_ENSBTAP0000005…
OLFR1038,OR8J1,OR8J3,OR8J2,OR8K1,OR8K5,OR8K3,OR5AL1,OLFR1044,OR5R1,OR8U1	GO:0004984; olfactory receptor activity; Molecular Function.GO:0007186; G-protein coupled receptor protein signaling pathway; Biological Process.GO:0016021; integral to membrane; Cellular Component	20	21	21	12	38	28	18	6	2	0	24	17	16	7	22	34	ENSECAT00000004896_HORSE,ENSECAT00000023139_HORSE,ENSMUST00000099892_MOUSE,ENSMUST00000099897_MOUSE,ENSRNOT00000012912_RATTU,GOAT_ENSP00000323688-D27_GOATS,ENSBTAP00000030292-D8_GRUNN,ENSSSCP00000006224_SWINE,ENSRNOT00000012899_RATTU,ENSMUST00000099901_MOUSE,ENSP00000308595-D1_GRUNN,PHO00008132_CHIRU,ENSBTAP00000033232-D72_GRUNN,ENSP00000301529-D60_GRUNN,Deer_GLEAN_10003911_DAVID,GOAT_ENSP0000030…
OR5AK2,OR5AK3P	NA.GO:0004984; olfactory receptor activity; Molecular Function.GO:0007186; G-protein coupled receptor protein signaling pathway; Biological Process.GO:0016021; integral to membrane; Cellular Component	3	5	5	6	4	3	4	1	0	1	2	7	3	1	5	6	ENSRNOT00000048581_RATTU,ENSMUST00000099929_MOUSE,PHO00005771_CHIRU,ENSBTAP00000051058-D58_GRUNN,ENSMUST00000099925_MOUSE,SHEEP_ENSBTAP00000051014-D2_SHEEP,ENSECAT00000004162_HORSE,ENSMUST00000099927_MOUSE,Deer_GLEAN_10004740_DAVID,Oryx_gazella_OR5AK2_10001291_GAZEL,KB016372.1_cdsid_EPY89809.1_CAMEL,ENSP00000347965-D75_GRUNN,ENSSSCP00000014024_SWINE,Deer_GLEAN_10004737_DAVID,KB016372.1_cdsid_EPY8…
OR5K3,OR5K4,OR5AC1,OR5H1,OR5AC2,OR5H6,OR5H15,OR5K2,OR5H14,OR5K1,OR5H2	NA.GO:0004984; olfactory receptor activity; Molecular Function.GO:0007186; G-protein coupled receptor protein signaling pathway; Biological Process.GO:0016021; integral to membrane; Cellular Component	14	19	12	3	20	8	5	1	0	0	26	3	12	10	31	25	GOAT_ENSP00000347418-D15_GOATS,ENSRNOT00000041491_RATTU,ENSBTAT00000008047_BOVIN,ENSECAT00000005624_HORSE,GOAT_ENSP00000373196-D16_GOATS,KB017828.1_cdsid_EPY75329.1_CAMEL,ENSMUST00000058564_MOUSE,SHEEP_ENSP00000373196-D5_SHEEP,ENSRNOT00000060875_RATTU,ENSMUST00000084791_MOUSE,SHEEP_ENSP00000373196_SHEEP,PHO00014878_CHIRU,ENSECAT00000005744_HORSE,ENSMUST00000114343_MOUSE,ENSRNOT00000048289_RATTU,S…
OR7A10,OR7A17,OR7C2,OR7A5,OR7A2P	GO:0004984; olfactory receptor activity; Molecular Function.GO:0007186; G-protein coupled receptor protein signaling pathway; Biological Process.GO:0016021; integral to membrane; Cellular Component.GO:0003735; structural constituent of ribosome; Molecular Function.GO:0005622; intracellular; Cellular Component.GO:0005840; ribosome; Cellular Component.GO:0006412; translation; Biological Process	48	28	21	21	66	40	43	21	13	1	32	9	9	4	11	8	Oryx_gazella_OR7A17_10007107_GAZEL,SHEEP_ENSP00000328144-D3_SHEEP,ENSBTAT00000064850_BOVIN,GOAT_ENSBTAP00000046656-D5_GOATS,PHO00009347_CHIRU,PHO00009364_CHIRU,Giraffe_OR7A10_10003246_GIRAF,Oryx_gazella_OR7A10_10006898_GAZEL,Oryx_gazella_OR7A17_10001232_GAZEL,ENSBTAT00000063735_BOVIN,ENSSSCP00000023768_SWINE,ENSBTAT00000054308_BOVIN,ENSBTAP00000050927-D68_GRUNN,ENSP00000303195-D78_GRUNN,Oryx_gaze…
OR4F6,OR4F3,OR4F15,OR4F21,OR4F16,OR4F29	GO:0004984; olfactory receptor activity; Molecular Function.GO:0007186; G-protein coupled receptor protein signaling pathway; Biological Process.GO:0016021; integral to membrane; Cellular Component	23	17	23	12	26	21	18	3	4	0	34	12	29	6	25	20	sheep_GLEAN_10004539_SHEEP,PHO00020541_CHIRU,ENSRNOT00000052368_RATTU,KB017602.1_cdsid_EPY76509.1_CAMEL,ENSP00000409316-D13_GRUNN,SHEEP_ENSBTAP00000018984_SHEEP,ENSMUST00000090329_MOUSE,KB019137.1_cdsid_EPY73123.1_CAMEL,ENSMUST00000058176_MOUSE,PHO00020546_CHIRU,ENSMUST00000099596_MOUSE,ENSECAT00000003526_HORSE,GOAT_ENSBTAP00000049625-D24_GOATS,ENSRNOT00000041799_RATTU,Oryx_gazella_OR4F3_10001160…
OR6C4,OR6C76,OR6C1,OR2AP1,OR6C2,OR6C75,OR6C3,OR6C74,OR6C68,OR6C70,OR6C65,OR6C6	GO:0003924; GTPase activity; Molecular Function.GO:0004984; olfactory receptor activity; Molecular Function.GO:0005525; GTP binding; Molecular Function.GO:0007186; G-protein coupled receptor protein signaling pathway; Biological Process.GO:0016021; integral to membrane; Cellular Component.GO:0003746; translation elongation factor activity; Molecular Function.GO:0005853; eukaryotic translation elo…	51	34	32	22	60	44	22	5	9	1	54	16	53	12	70	48	ENSSSCP00000000364_SWINE,ENSBTAP00000008284-D24_GRUNN,ENSRNOT00000043396_RATTU,ENSBTAT00000044037_BOVIN,ENSSSCP00000020554_SWINE,Deer_GLEAN_10000469_DAVID,ENSRNOT00000012866_RATTU,ENSRNOT00000049493_RATTU,PHO00015856_CHIRU,SHEEP_ENSBTAP00000051071-D3_SHEEP,PHO00015918_CHIRU,Deer_GLEAN_10003236_DAVID,ENSSSCP00000022081_SWINE,ENSBTAT00000055881_BOVIN,ENSMUST00000076508_MOUSE,ENSRNOT00000051053_RATT…
OR52A1,OR52A5,OR52A4	GO:0004984; olfactory receptor activity; Molecular Function.GO:0007186; G-protein coupled receptor protein signaling pathway; Biological Process.GO:0016021; integral to membrane; Cellular Component.GO:0004980; melanocyte-stimulating hormone receptor activity; Molecular Function	8	10	10	8	16	13	5	3	5	0	8	5	10	3	5	7	SHEEP_ENSBTAP00000046401_SHEEP,ENSBTAP00000043136-D78_GRUNN,ENSSSCP00000015652_SWINE,ENSSSCP00000015640_SWINE,ENSBTAT00000054204_BOVIN,GOAT_ENSBTAP00000042677-D33_GOATS,ENSSSCP00000015637_SWINE,ENSBTAP00000002647-D62_GRUNN,GOAT_ENSBTAP00000052058-D3_GOATS,Giraffe_OR52A1_10003023_GIRAF,KB019771.1_cdsid_EPY72753.1_CAMEL,ENSECAT00000024370_HORSE,SHEEP_ENSP00000333196-D26_SHEEP,Oryx_gazella_OR52A1_10…
VN1R4,CFC1,VN1R2,TARM1,VN1R1	GO:0007186; G-protein coupled receptor protein signaling pathway; Biological Process.GO:0016021; integral to membrane; Cellular Component.GO:0016503; pheromone receptor activity; Molecular Function	23	14	17	3	29	16	11	3	4	1	10	4	15	3	54	143	Muntiacus_muntjak_TARM1_10006624_MUNTJ,ENSMUST00000168398_MOUSE,ENSMUST00000062811_MOUSE,ENSECAT00000000844_HORSE,Giraffe_VN1R4_10000104_GIRAF,ENSMUST00000167253_MOUSE,ENSMUST00000049819_MOUSE,ENSMUST00000050416_MOUSE,ENSMUST00000173886_MOUSE,ENSMUST00000172551_MOUSE,PHO00021506_CHIRU,ENSMUST00000078475_MOUSE,ENSSSCP00000006179_SWINE,ENSMUST00000168926_MOUSE,ENSMUST00000075053_MOUSE,ENSBTAT000000…
CD1E,CD1D,CD1A,CD1B,CD1C	GO:0006955; immune response; Biological Process.GO:0016020; membrane; Cellular Component.GO:0019882; antigen processing and presentation; Biological Process.NA	7	8	11	8	10	12	4	6	1	2	4	5	11	5	1	2	Oryx_gazella_NA_10000171_GAZEL,goat_GLEAN_10006919_GOATS,ENSECAT00000009056_HORSE,KB016326.1_cdsid_EPY90211.1_CAMEL,ENSBTAT00000038392_BOVIN,ENST00000368168_HUMAN,Deer_GLEAN_10004374_DAVID,Deer_GLEAN_10004375_DAVID,ENSBTAT00000031114_BOVIN,ENSBTAP00000009739-D3_GRUNN,ENSBTAP00000001274-D1_GRUNN,ENSBTAT00000055572_BOVIN,ENSBTAT00000052046_BOVIN,SHEEP_ENSBTAP00000013155_SHEEP,ENSBTAP00000033858-D2_…
CENPA,TGAS113E22.1,H3F3C,HIS-71,HIST3H3,HIST1H3A,HIST1H3C,HIST1H3E,HIST1H3J,HIST1H3D,H3F3B,HIST1H3B,HIST2H3C,HIST1H3F,H3F3A,HIST1H3G,HIST2H3D,HIST2H3PS2,HIST2H3A,HIST1H3I,HIST1H3H	GO:0000786; nucleosome; Cellular Component.GO:0003677; DNA binding; Molecular Function.GO:0006334; nucleosome assembly; Biological Process	23	19	27	25	26	25	17	8	13	20	11	17	17	19	18	16	Oryx_gazella_NA_10016958_GAZEL,ENSBTAP00000051709-D12_GRUNN,PHO00000528_CHIRU,ENSBTAT00000044975_BOVIN,ENSECAT00000017091_HORSE,SHEEP_ENSBTAP00000053067-D2_SHEEP,Deer_GLEAN_10001718_DAVID,ENSRNOT00000043897_RATTU,ENSBTAT00000034186_BOVIN,ENSP00000355657-D13_GRUNN,Oryx_gazella_H3F3C_10001945_GAZEL,Oryx_gazella_NA_10020272_GAZEL,ENSECAT00000001716_HORSE,sheep_GLEAN_10009490_SHEEP,ENST00000357647_HU…
HIST1H2BA,HIST1H2BN,HIST2H2BF,SUBH2BV,HIST1H2BH,HIST2H2BE,HIST1H2BK,HIST1H2BB,HIST3H2BB,HIST1H2BM,ZGC:112234,H2BFWT,HIST1H2BJ,H2B-VII,HISTH2B,HIST1H2BL,HIST1H2BF,HIST1H2BG,H2BFM,HIST1H2BD,HIST1H2BE,HIST1H2BO,HIST1H2BC,HIST1H2BI	GO:0000786; nucleosome; Cellular Component.GO:0003677; DNA binding; Molecular Function.GO:0005634; nucleus; Cellular Component.GO:0006334; nucleosome assembly; Biological Process	26	26	26	29	85	77	25	16	22	23	22	23	22	20	14	20	SHEEP_ENSBTAP00000052168-D4_SHEEP,ENST00000359465_HUMAN,ENSBTAT00000021322_BOVIN,ENSBTAP00000023918-D2_GRUNN,BACU007804_WHALE,Muntiacus_muntjak_NA_10005963_MUNTJ,ENSBTAT00000038531_BOVIN,KB016868.1_cdsid_EPY83094.1_CAMEL,ENSBTAT00000023918_BOVIN,Deer_GLEAN_10002503_DAVID,Deer_GLEAN_10001027_DAVID,Giraffe_NA_10000794_GIRAF,ENSBTAP00000033317-D1_GRUNN,Oryx_gazella_zgc:112234_10000344_GAZEL,Deer_GLE…
ZNF616,ZNF665,ZNF16,ZNF836,ZNF347,ZNF404,ZNF568,ZNF208,ZNF624,ZNF197,ZNF473,ZNF677,ZNF91,ZNF729,ZNF345,ZNF271,ZNF850,ZFP62,ZNF160,ZNF845,ZNF480,ZNF99,AC022415.1,ZNF28,ZNF415,ZNF320,ZNF578,ZNF611,ZNF468,ZNF841,ZNF594,ZNF610,ZNF880,ZNF766,ZNF600,ZNF860,ZNF701,ZNF528,ZNF808,ZNF83	GO:0003676; nucleic acid binding; Molecular Function.GO:0005622; intracellular; Cellular Component.GO:0006355; regulation of transcription, DNA-dependent; Biological Process.GO:0008270; zinc ion binding; Molecular Function.GO:0003677; DNA binding; Molecular Function.GO:0000786; nucleosome; Cellular Component.GO:0005634; nucleus; Cellular Component.GO:0006334; nucleosome assembly; Biological Proce…	22	13	15	25	42	36	11	13	17	30	14	0	27	32	9	23	ENSMUST00000034259_MOUSE,Muntiacus_muntjak_ZNF845_10005300_MUNTJ,BACU005995_WHALE,Muntiacus_muntjak_ZNF271_10022861_MUNTJ,ENST00000397104_HUMAN,ENSSSCP00000006177_SWINE,ENST00000300619_HUMAN,Giraffe_ZNF616_10003888_GIRAF,SHEEP_ENSBTAP00000049089_SHEEP,PHO00021501_CHIRU,GOAT_ENSBTAP00000014679_GOATS,ENSECAT00000016521_HORSE,ENSMUST00000099449_MOUSE,ENSRNOT00000032909_RATTU,ENSSSCP00000025766_SWINE…
ZNF793,ZNF630	NA.GO:0003676; nucleic acid binding; Molecular Function.GO:0005622; intracellular; Cellular Component.GO:0006355; regulation of transcription, DNA-dependent; Biological Process	2	1	3	0	3	3	0	1	0	0	0	0	0	1	1	0	ENSRNOT00000037975_RATTU,ENSBTAP00000046998-D21_GRUNN,goat_GLEAN_10001554_GOATS,GOAT_ENSP00000378375_GOATS,ENST00000428463_HUMAN,SHEEP_ENSP00000378375_SHEEP,Muntiacus_muntjak_ZNF793_10003746_MUNTJ,ENSBTAP00000004508-D1_GRUNN,ENSBTAT00000050265_BOVIN,PHO00008206_CHIRU,GOAT_ENSBTAP00000049680-D29_GOATS,ENSBTAP00000046998-D1_GRUNN,ENSBTAT00000054432_BOVIN,ENSBTAT00000004508_BOVIN,PHO00013350_CHIRU
NA	NA	42	8	9	0	19	0	0	0	0	0	0	0	0	0	0	0	PHO00010077_CHIRU,ENSBTAP00000050921-D50_GRUNN,ENSBTAP00000047226-D5_GRUNN,ENSBTAP00000052619-D23_GRUNN,PHO00021599_CHIRU,ENSBTAP00000050430-D81_GRUNN,PHO00021630_CHIRU,ENSBTAP00000048584-D28_GRUNN,ENSBTAP00000050273-D68_GRUNN,goat_GLEAN_10015786_GOATS,PHO00010084_CHIRU,ENSBTAP00000052257-D20_GRUNN,PHO00021608_CHIRU,ENSBTAP00000050721-D43_GRUNN,goat_GLEAN_10015790_GOATS,sheep_GLEAN_10017276_SHEEP…
CLEC2L,CD69,CLEC5A,KLRF2,KLRG1,CLEC2B,CLECL1,KLRF1,CLEC2D,KLRB1,CLEC2A	GO:0005488; binding; Molecular Function.GO:0005529; sugar binding; Molecular Function	8	7	10	4	13	12	3	6	3	2	7	3	9	10	18	17	ENSSSCP00000024397_SWINE,ENSSSCP00000029643_SWINE,Muntiacus_muntjak_CLEC2B_10002474_MUNTJ,BACU006746_WHALE,yakG020343_GRUNN,ENSBTAP00000015955-D1_GRUNN,ENSBTAT00000027255_BOVIN,ENSMUST00000071391_MOUSE,PHO00009669_CHIRU,ENSBTAP00000009016-D2_GRUNN,ENSBTAT00000018130_BOVIN,Muntiacus_muntjak_CD69_10002072_MUNTJ,ENSMUST00000032207_MOUSE,ENSBTAT00000009016_BOVIN,ENSRNOT00000009594_RATTU,PHO00021066_C…
KLHL18,KLHL7,KLHL30,KLHL14,KLHL3,KLHL29,KLHL6,KLHL21,GAN,KLHL24,KLHL23,IVNS1ABP,KLHL32,KLHL35,KLHL4,IPP,KLHL12,KLHL5,KLHL10,KLHL20,KLHL33,KLHL31,KLHL11,KBTBD3,KLHL9,KLHL8,KLHL13,KLHL38,KLHL34,KLHL1,KLHL36,ENC1,KLHL2,KEAP1,KLHL25,KLHL28,KLHL15,KLHL22,KLHL17	GO:0005515; protein binding; Molecular Function	38	37	37	12	40	39	35	11	12	30	38	33	36	39	40	40	PHO00014027_CHIRU,Deer_GLEAN_10011794_DAVID,BACU019656_WHALE,BACU007406_WHALE,PHO00014302_CHIRU,KB016932.1_cdsid_EPY82310.1_CAMEL,SHEEP_ENSP00000351933_SHEEP,GOAT_ENSBTAP00000031351_GOATS,ENSMUST00000023509_MOUSE,ENSBTAT00000036408_BOVIN,ENSSSCP00000002904_SWINE,ENSP00000317442-D1_GRUNN,ENSSSCP00000004686_SWINE,SHEEP_ENSP00000424131_SHEEP,Muntiacus_muntjak_KLHL24_10020494_MUNTJ,Deer_GLEAN_1000427…
RPS12	GO:0003735; structural constituent of ribosome; Molecular Function.GO:0005622; intracellular; Cellular Component.GO:0005840; ribosome; Cellular Component.GO:0006412; translation; Biological Process	5	4	5	5	6	3	3	3	2	5	1	2	2	1	13	5	ENSRNOT00000027225_RATTU,ENSBTAT00000033078_BOVIN,ENSRNOT00000050172_RATTU,ENSBTAP00000048421-D1_GRUNN,BACU014314_WHALE,ENSMUST00000074266_MOUSE,BACU008036_WHALE,BACU014315_WHALE,goat_GLEAN_10005607_GOATS,Oryx_gazella_RPS12_10009563_GAZEL,Oryx_gazella_RPS12_10013804_GAZEL,KB017043.1_cdsid_EPY80892.1_CAMEL,ENSMUST00000072789_MOUSE,ENSBTAP00000033002-D2_GRUNN,Oryx_gazella_RPS12_10003720_GAZEL,ENSRN…
ELSPBP1,BSPH1	NA	7	6	4	3	5	5	3	3	1	1	3	2	6	2	0	2	ENSBTAT00000005069_BOVIN,PHO00006977_CHIRU,GOAT_ENSBTAP00000053136_GOATS,ENSECAT00000011635_HORSE,SHEEP_ENSBTAP00000025134-D3_SHEEP,ENSBTAP00000051786-D1_GRUNN,ENSECAT00000025025_HORSE,ENSSSCP00000003383_SWINE,BACU002165_WHALE,ENSMUST00000108526_MOUSE,ENSBTAT00000021448_BOVIN,Deer_GLEAN_10004703_DAVID,ENSECAT00000007789_HORSE,ENSBTAP00000053136-D1_GRUNN,ENST00000339841_HUMAN,ENSMUST00000098811_MO…
TUBA1B,TUBA1C,TUB2	GO:0005198; structural molecule activity; Molecular Function.GO:0005525; GTP binding; Molecular Function.GO:0005874; microtubule; Cellular Component.GO:0007017; microtubule-based process; Biological Process.GO:0007018; microtubule-based movement; Biological Process.GO:0043234; protein complex; Cellular Component.GO:0051258; protein polymerization; Biological Process.NA	1	6	5	2	2	1	0	0	1	1	0	5	0	0	0	0	KB017242.1_cdsid_EPY78793.1_CAMEL,Oryx_gazella_TUBA1C_10006249_GAZEL,KB017242.1_cdsid_EPY78791.1_CAMEL,Giraffe_TUBA1B_10003469_GIRAF,GOAT_ENSBTAP00000041397-D2_GOATS,goat_GLEAN_10021090_GOATS,KB019218.1_cdsid_EPY73087.1_CAMEL,Oryx_gazella_TUB2_10007693_GAZEL,PHO00012543_CHIRU,SHEEP_ENSBTAP00000038184-D3_SHEEP,ENSBTAT00000023588_BOVIN,KB017061.1_cdsid_EPY80771.1_CAMEL,sheep_GLEAN_10018666_SHEEP,go…
KRTAP12-2,KRTAP12-3,KRTAP12-1,KRTAP12-4	NA.GO:0045095; keratin filament; Cellular Component	1	2	2	3	4	4	3	0	0	0	0	0	4	4	3	5	GOAT_ENSBTAP00000024766-D2_GOATS,Oryx_gazella_KRTAP12-2_10016487_GAZEL,ENST00000546091_HUMAN,ENSECAT00000014442_HORSE,GOAT_ENSP00000375476_GOATS,ENSBTAP00000024766-D4_GRUNN,ENSMUST00000092370_MOUSE,Oryx_gazella_KRTAP12-2_10001478_GAZEL,ENSRNOT00000001635_RATTU,ENSECAT00000015755_HORSE,ENSBTAP00000024766-D3_GRUNN,ENSRNOT00000045125_RATTU,Deer_GLEAN_10013677_DAVID,ENSBTAT00000063461_BOVIN,ENSBTAT00…
KRTAP9-7,KRTAP4-7,KRTAP4-1,KRTAP4-2,KRTAP4-4,AC100808.7,KRTAP9-3,KRTAP4-11,KRTAP4-8,KRTAP4-5,KRTAP4-6,KRTAP9-9,KRTAP9-2,KRTAP4-3,KRTAP4-9,KRTAP9-6,KRTAP9-4,KRTAP9-8,KRTAP9-1	NA.GO:0045095; keratin filament; Cellular Component	7	5	6	3	8	8	1	1	0	0	0	6	2	19	10	24	PHO00010496_CHIRU,ENST00000458321_HUMAN,ENSP00000381488-D5_GRUNN,KE544080.1_cdsid_EPY72332.1_CAMEL,Muntiacus_muntjak_KRTAP4-1_10010195_MUNTJ,ENSBTAT00000043148_BOVIN,ENSMUST00000104929_MOUSE,ENSP00000366950-D3_GRUNN,ENSBTAT00000055532_BOVIN,ENST00000390661_HUMAN,GOAT_ENSP00000334922-D9_GOATS,PHO00010582_CHIRU,ENST00000440582_HUMAN,ENSMUST00000105054_MOUSE,ENST00000411528_HUMAN,ENSMUST00000092695_…
V-TCR,TCRB,TRBV12-3,TRBV23OR9-2,TRBV21OR9-2	NA	27	27	29	12	37	21	16	16	15	6	5	9	25	2	4	6	sheep_GLEAN_10000160_SHEEP,ENSBTAP00000050023-D3_GRUNN,ENSBTAT00000053610_BOVIN,ENSBTAP00000048427-D37_GRUNN,sheep_GLEAN_10000149_SHEEP,SHEEP_ENSP00000374915-D4_SHEEP,Giraffe_NA_10001250_GIRAF,ENSECAT00000000871_HORSE,goat_GLEAN_10001021_GOATS,PHO00019524_CHIRU,PHO00019506_CHIRU,SHEEP_ENSBTAP00000052911-D2_SHEEP,Muntiacus_muntjak_NA_10003095_MUNTJ,PHO00019538_CHIRU,Giraffe_V-TCR_10001243_GIRAF,SH…
NA	NA	10	10	0	0	60	0	0	0	0	1	0	0	200	0	2	2	ENSBTAP00000051259-D89_GRUNN,ENSECAT00000008397_HORSE,ENSECAT00000008439_HORSE,ENSBTAP00000051671-D35_GRUNN,ENSECAT00000017997_HORSE,ENSBTAP00000051671-D17_GRUNN,ENSECAT00000000621_HORSE,ENSECAT00000020263_HORSE,ENSECAT00000011947_HORSE,ENSECAT00000007416_HORSE,ENSECAT00000017776_HORSE,ENSECAT00000006226_HORSE,ENSECAT00000016302_HORSE,ENSECAT00000009935_HORSE,PHO00014738_CHIRU,ENSECAT00000024347_…
SETMAR	NA	37	6	8	0	43	52	0	0	0	1	0	0	0	1	0	0	PHO00011326_CHIRU,ENSBTAP00000053094-D86_GRUNN,PHO00008438_CHIRU,PHO00005610_CHIRU,ENSBTAP00000005410-D46_GRUNN,PHO00017503_CHIRU,ENSBTAT00000063661_BOVIN,ENSBTAT00000009396_BOVIN,PHO00010248_CHIRU,ENSBTAP00000009043-D64_GRUNN,ENSBTAP00000011250-D1_GRUNN,ENSBTAT00000063587_BOVIN,ENSBTAP00000033501-D1_GRUNN,ENSBTAP00000020978-D18_GRUNN,ENSBTAT00000037486_BOVIN,ENSBTAP00000051330-D49_GRUNN,PHO00013…
TAS2R41,TAS2R60,TAS2R16,TAS2R40,TAS2R5,TAS2R3,TAS2R39,TAS2R31,TAS2R50,TAS2R7,TAS2R14,TAS2R9,TAS2R10,TAS2R20,TAS2R46,TAS2R8,TAS2R19,TAS2R13,TAS2R4,TAS2R38,TAS2R42,TAS2R1,TAS2R43,TAS2R30	GO:0004930; G-protein coupled receptor activity; Molecular Function.GO:0007186; G-protein coupled receptor protein signaling pathway; Biological Process.GO:0016021; integral to membrane; Cellular Component.GO:0050909; sensory perception of taste; Biological Process	19	20	24	4	28	15	7	4	1	1	10	5	15	24	36	36	ENSMUST00000069268_MOUSE,ENSRNOT00000024048_RATTU,PHO00013727_CHIRU,GOAT_ENSBTAP00000040608-D2_GOATS,ENSBTAP00000049472-D3_GRUNN,ENSECAT00000023867_HORSE,PHO00020052_CHIRU,ENSBTAT00000043004_BOVIN,SHEEP_ENSBTAP00000040606-D5_SHEEP,SHEEP_ENSBTAP00000040608_SHEEP,ENST00000390675_HUMAN,ENSRNOT00000040828_RATTU,GOAT_ENSP00000386201_GOATS,SHEEP_ENSBTAP00000042858_SHEEP,ENSRNOT00000007435_RATTU,ENSRNOT…
V1RA16,VN1R3	NA.GO:0007186; G-protein coupled receptor protein signaling pathway; Biological Process.GO:0016021; integral to membrane; Cellular Component.GO:0016503; pheromone receptor activity; Molecular Function	3	3	3	2	5	4	1	1	0	0	2	2	6	0	42	91	ENSECAT00000000812_HORSE,ENSMUST00000091737_MOUSE,ENSRNOT00000045560_RATTU,ENSRNOT00000023832_RATTU,ENSMUST00000074252_MOUSE,ENSRNOT00000052101_RATTU,ENSECAT00000006197_HORSE,ENSMUST00000091731_MOUSE,SHEEP_ENSBTAP00000048317_SHEEP,ENSMUST00000089919_MOUSE,ENSMUST00000091736_MOUSE,ENSECAT00000005409_HORSE,ENSMUST00000077482_MOUSE,ENSMUST00000089419_MOUSE,ENSRNOT00000043496_RATTU,ENSSSCP00000025148…
GLRX5	NA.GO:0009055; electron carrier activity; Molecular Function.GO:0015035; protein disulfide oxidoreductase activity; Molecular Function.GO:0045454; cell redox homeostasis; Biological Process	1	3	1	4	3	1	1	2	0	1	1	1	1	1	1	1	BACU007874_WHALE,ENSBTAP00000017860-D1_GRUNN,sheep_GLEAN_10018201_SHEEP,Oryx_gazella_GLRX5_10019025_GAZEL,sheep_GLEAN_10001570_SHEEP,Deer_GLEAN_10008999_DAVID,ENSECAT00000021167_HORSE,yakG043852_GRUNN,sheep_GLEAN_10014749_SHEEP,yakA04033_GRUNN,PHO00003223_CHIRU,Oryx_gazella_GLRX5_10005048_GAZEL,ENSMUST00000021522_MOUSE,Muntiacus_muntjak_Glrx5_10010223_MUNTJ,GOAT_ENSP00000328570_GOATS,Muntiacus_mu…
ZNF280C,ZNF280D,ZNF280B,ZNF280A	GO:0005622; intracellular; Cellular Component.GO:0008270; zinc ion binding; Molecular Function	5	4	4	3	4	9	3	3	3	4	3	0	2	4	3	3	Giraffe_ZNF280C_10004746_GIRAF,SHEEP_ENSBTAP00000001332_SHEEP,ENSBTAT00000049902_BOVIN,ENST00000370978_HUMAN,BACU017177_WHALE,ENSBTAT00000047913_BOVIN,PHO00021683_CHIRU,GOAT_ENSP00000360017_GOATS,ENSBTAT00000049218_BOVIN,Oryx_gazella_ZNF280D_10019221_GAZEL,Oryx_gazella_ZNF280B_10000516_GAZEL,ENST00000267807_HUMAN,ENSP00000360017-D2_GRUNN,ENSMUST00000098576_MOUSE,Muntiacus_muntjak_ZNF280B_10013687…
SAL1,LCN9	GO:0005488; binding; Molecular Function.GO:0005215; transporter activity; Molecular Function.GO:0005549; odorant binding; Molecular Function.GO:0006810; transport; Biological Process.GO:0005550; pheromone binding; Molecular Function	13	10	13	8	15	10	6	7	2	0	6	2	8	1	16	30	ENSMUST00000077719_MOUSE,ENSECAT00000000508_HORSE,ENSMUST00000074018_MOUSE,ENSMUST00000060932_MOUSE,ENSSSCP00000006171_SWINE,ENSSSCP00000012875_SWINE,ENSSSCP00000006170_SWINE,ENSBTAP00000051962-D2_GRUNN,ENSRNOT00000012293_RATTU,sheep_GLEAN_10017835_SHEEP,ENSBTAT00000016571_BOVIN,ENSBTAT00000063613_BOVIN,ENSBTAP00000048493-D1_GRUNN,Muntiacus_muntjak_Lcn9_10020316_MUNTJ,ENSRNOT00000046857_RATTU,Ory…
RPS4,RPS4Y1,RPS4X,RPS4Y2,RPS4XP21	GO:0003735; structural constituent of ribosome; Molecular Function.GO:0005622; intracellular; Cellular Component.GO:0005840; ribosome; Cellular Component.GO:0006412; translation; Biological Process.GO:0003723; RNA binding; Molecular Function	9	10	12	8	16	7	6	4	3	11	2	5	2	4	5	3	ENSBTAP00000051734-D1_GRUNN,goat_GLEAN_10005314_GOATS,PHO00010115_CHIRU,ENSBTAP00000050264-D12_GRUNN,Oryx_gazella_RPS4_10002742_GAZEL,Oryx_gazella_RPS4_10022338_GAZEL,ENSBTAP00000051734-D11_GRUNN,SHEEP_ENSP00000362744_SHEEP,ENSECAT00000011336_HORSE,Oryx_gazella_RPS4_10007489_GAZEL,PHO00002564_CHIRU,Muntiacus_muntjak_RPS4_10005486_MUNTJ,ENSBTAT00000063361_BOVIN,KB017263.1_cdsid_EPY78642.1_CAMEL,EN…
SPLUNC2A,SPLUNC2B,BPIFA2	NA.GO:0008289; lipid binding; Molecular Function	3	4	6	5	4	4	3	2	0	1	1	0	1	1	2	1	BACU015565_WHALE,Oryx_gazella_SPLUNC2A_10001347_GAZEL,GOAT_ENSBTAP00000012052-D2_GOATS,GOAT_ENSBTAP00000041948-D4_GOATS,Muntiacus_muntjak_SPLUNC2A_10022779_MUNTJ,ENSBTAT00000012052_BOVIN,PHO00018131_CHIRU,SHEEP_ENSBTAP00000012052-D4_SHEEP,ENSSSCP00000007730_SWINE,GOAT_ENSBTAP00000041948-D2_GOATS,GOAT_ENSBTAP00000041949_GOATS,GOAT_ENSBTAP00000041948-D3_GOATS,SHEEP_ENSBTAP00000012052_SHEEP,SHEEP_EN…
GVINP1,GVIN1	NA.GO:0003924; GTPase activity; Molecular Function.GO:0005525; GTP binding; Molecular Function	1	2	4	7	2	1	1	1	1	1	1	1	1	0	1	2	ENSECAT00000002542_HORSE,goat_GLEAN_10008308_GOATS,ENSRNOT00000041360_RATTU,goat_GLEAN_10007289_GOATS,ENSBTAP00000049852-D2_GRUNN,Oryx_gazella_Gvin1_10000615_GAZEL,Oryx_gazella_GVINP1_10001781_GAZEL,Deer_GLEAN_10006183_DAVID,Oryx_gazella_GVINP1_10000614_GAZEL,goat_GLEAN_10000473_GOATS,ENSSSCP00000015547_SWINE,Oryx_gazella_GVINP1_10001782_GAZEL,ENSMUST00000006667_MOUSE,Muntiacus_muntjak_GVINP1_100…
SKP1	GO:0005515; protein binding; Molecular Function.GO:0006511; ubiquitin-dependent protein catabolic process; Biological Process	4	2	4	3	4	2	1	1	1	6	0	0	1	1	1	1	BACU005329_WHALE,BACU005080_WHALE,ENSBTAP00000050243-D2_GRUNN,Giraffe_skp1_10015797_GIRAF,goat_GLEAN_10004431_GOATS,BACU020496_WHALE,Muntiacus_muntjak_skp1_10013335_MUNTJ,goat_GLEAN_10017790_GOATS,goat_GLEAN_10017712_GOATS,Oryx_gazella_skp1_10017256_GAZEL,ENSRNOT00000007676_RATTU,ENSBTAT00000063619_BOVIN,ENSBTAP00000050243-D4_GRUNN,PHO00000047_CHIRU,PHO00001994_CHIRU,Deer_GLEAN_10016835_DAVID,ENS…
DEFB9,DEFB1,DEFB3	NA.GO:0005576; extracellular region; Cellular Component.GO:0006952; defense response; Biological Process	2	2	2	2	10	12	0	3	0	0	0	0	0	0	0	0	ENSBTAP00000044857-D4_GRUNN,ENSBTAT00000065980_BOVIN,GOAT_ENSBTAP00000040081_GOATS,ENSBTAP00000046999-D2_GRUNN,ENSBTAP00000047159-D1_GRUNN,SHEEP_ENSBTAP00000019635_SHEEP,Muntiacus_muntjak_DEFB3_10000588_MUNTJ,ENSBTAP00000046543-D7_GRUNN,SHEEP_ENSBTAP00000049375_SHEEP,ENSBTAT00000063757_BOVIN,ENSBTAT00000066254_BOVIN,ENSBTAP00000046539-D4_GRUNN,ENSBTAT00000009756_BOVIN,ENSBTAT00000054965_BOVIN,ENS…
NA	NA	4	2	1	0	22	0	0	0	0	0	0	0	1	0	0	0	PHO00011457_CHIRU,ENSBTAP00000044190-D45_GRUNN,ENSBTAP00000044185-D96_GRUNN,ENSBTAP00000048538-D53_GRUNN,ENSBTAP00000047951-D27_GRUNN,ENSBTAP00000044190-D85_GRUNN,ENSBTAP00000044401-D4_GRUNN,ENSBTAP00000044190-D8_GRUNN,PHO00003844_CHIRU,ENSBTAP00000045504-D76_GRUNN,ENSECAT00000026157_HORSE,goat_GLEAN_10015788_GOATS,ENSBTAP00000048365-D68_GRUNN,SHEEP_ENSBTAP00000044202-D16_SHEEP,ENSBTAP00000044190…

## Sheet: Ruminant_contractions
Ruminant gene contractions
symbol	GO annotation	Pantholops hodgsonii	Ovis aries	Capra hircus	Oryx gazella	Bos grunniens	Bos taurus	Elaphurus davidianus	Muntiacus muntjak	Giraffa camelopardalis	Balaenoptera acutorostrata	Sus scrofa	Camelus ferus	Equus caballus	Homo sapiens	Rattus norvegicus	Mus musculus	Gene cluster
ZNF699,ZNF555,ZNF709,ZNF177,ZNF791,ZNF77,ZNF20,ZNF442,ZNF556,AC022415.5,ZNF844,ZNF441,ZNF700,ZNF439,ZNF563,ZNF136,ZNF627,ZNF490,ZNF14,ZNF124,CTD-2192J16.17,ZNF823,ZNF491,ZNF433,ZNF44,ZNF440,ZNF564,ZNF443,ZNF57,ZNF669,ZNF763,ZNF878,AC022415.4,ZNF101	GO:0003676; nucleic acid binding; Molecular Function.GO:0005622; intracellular; Cellular Component.GO:0006355; regulation of transcription, DNA-dependent; Biological Process.GO:0008270; zinc ion binding; Molecular Function.GO:0003677; DNA binding; Molecular Function	7	4	3	3	9	8	1	5	6	19	11	0	28	34	35	88	ENSMUST00000105718_MOUSE,ENSRNOT00000021635_RATTU,ENSRNOT00000048288_RATTU,ENSSSCP00000014589_SWINE,BACU007453_WHALE,ENSBTAT00000011050_BOVIN,BACU002627_WHALE,Muntiacus_muntjak_ZNF709_10001987_MUNTJ,GOAT_ENSBTAP00000020989_GOATS,ENSMUST00000110964_MOUSE,ENSSSCP00000014578_SWINE,ENST00000292241_HUMAN,ENSECAT00000009734_HORSE,ENSMUST00000054780_MOUSE,BACU003966_WHALE,Giraffe_ZNF699_10004826_GIRAF,E…
NA	NA	0	1	0	0	3	0	0	0	0	6	0	0	303	0	0	0	ENSECAT00000010097_HORSE,ENSECAT00000003181_HORSE,ENSECAT00000002743_HORSE,ENSECAT00000005969_HORSE,ENSECAT00000003227_HORSE,ENSECAT00000002781_HORSE,ENSECAT00000002233_HORSE,ENSECAT00000005763_HORSE,ENSECAT00000015730_HORSE,ENSECAT00000004921_HORSE,ENSECAT00000009777_HORSE,SHEEP_ENSBTAP00000049884_SHEEP,ENSECAT00000005179_HORSE,ENSECAT00000002697_HORSE,ENSBTAP00000043551-D89_GRUNN,ENSECAT0000001…

## Sheet: Ruminant_expansions
Ruminant gene expansions
symbol	GO annotation	Pantholops hodgsonii	Ovis aries	Capra hircus	Oryx gazella	Bos grunniens	Bos taurus	Elaphurus davidianus	Muntiacus muntjak	Giraffa camelopardalis	Balaenoptera acutorostrata	Sus scrofa	Camelus ferus	Equus caballus	Homo sapiens	Rattus norvegicus	Mus musculus	Gene cluster
AKR1D1,AKR1E2,AKR1B1,AKR1A1,AKR1B10,AKR1C2,AKR1C1,AKR1C3,AP001793.1,AKR1C4,AKR1CL1,AKR1B15	GO:0016491; oxidoreductase activity; Molecular Function.GO:0055114; oxidation reduction; Biological Process.GO:0055114; oxidation-reduction process; Biological Process	21	20	22	12	25	19	15	27	10	5	12	6	16	12	25	17	Muntiacus_muntjak_NA_10022494_MUNTJ,PHO00016769_CHIRU,GOAT_ENSBTAP00000013082-D3_GOATS,ENSRNOT00000068153_RATTU,ENSSSCP00000011901_SWINE,ENSECAT00000022373_HORSE,ENSECAT00000012484_HORSE,Giraffe_NA_10012899_GIRAF,PHO00021197_CHIRU,Muntiacus_muntjak_NA_10009863_MUNTJ,Giraffe_AKR1D1_10013671_GIRAF,ENSSSCP00000011887_SWINE,Muntiacus_muntjak_AKR1B1_10003861_MUNTJ,GOAT_ENSBTAP00000030543-D3_GOATS,ENSB…
APOL3,APOL6,APOL5,APOL4,APOL2,APOL1	GO:0003774; motor activity; Molecular Function.GO:0005524; ATP binding; Molecular Function.GO:0005576; extracellular region; Cellular Component.GO:0006869; lipid transport; Biological Process.GO:0008289; lipid binding; Molecular Function.GO:0016459; myosin complex; Cellular Component.GO:0042157; lipoprotein metabolic process; Biological Process	7	5	11	10	11	8	13	16	7	3	4	5	2	6	6	13	Muntiacus_muntjak_APOL3_10000691_MUNTJ,ENSBTAT00000017482_BOVIN,PHO00016861_CHIRU,KB016972.1_cdsid_EPY81827.1_CAMEL,Deer_GLEAN_10014527_DAVID,ENSMUST00000089469_MOUSE,ENSSSCP00000000154_SWINE,ENSRNOT00000056263_RATTU,ENSRNOT00000031951_RATTU,BACU000876_WHALE,ENST00000249044_HUMAN,Deer_GLEAN_10014529_DAVID,ENSRNOT00000031568_RATTU,ENSRNOT00000040706_RATTU,Muntiacus_muntjak_APOL3_10008851_MUNTJ,Mun…
C20ORF106,FAM209A,FAM209B,C20ORF107	NA	2	7	5	5	3	5	9	3	5	1	1	0	1	2	1	1	ENST00000371325_HUMAN,ENSBTAT00000063549_BOVIN,sheep_GLEAN_10015492_SHEEP,Deer_GLEAN_10000791_DAVID,ENSECAT00000022381_HORSE,Deer_GLEAN_10007905_DAVID,ENSBTAT00000063943_BOVIN,ENSMUST00000029007_MOUSE,Deer_GLEAN_10014157_DAVID,Giraffe_C20orf106_10018174_GIRAF,BACU011301_WHALE,ENSRNOT00000006949_RATTU,Muntiacus_muntjak_FAM209B_10022713_MUNTJ,goat_GLEAN_10010792_GOATS,PHO00002984_CHIRU,Deer_GLEAN_1…
CATHL2,PMAP37,CATHL1A,CATHL7,CATHL1,CATHL3,CATHL4,CATHL6,CAMP	GO:0005576; extracellular region; Cellular Component.GO:0006952; defense response; Biological Process	6	7	6	8	8	11	4	10	8	1	4	4	3	1	1	1	Muntiacus_muntjak_CATHL2_10000369_MUNTJ,ENSBTAP00000026747-D1_GRUNN,ENSBTAT00000021503_BOVIN,SHEEP_ENSBTAP00000034497_SHEEP,Deer_GLEAN_10003049_DAVID,ENSBTAT00000026747_BOVIN,GOAT_ENSBTAP00000034497-D2_GOATS,ENSSSCP00000012102_SWINE,Muntiacus_muntjak_CATHL2_10018905_MUNTJ,ENSSSCP00000021393_SWINE,Muntiacus_muntjak_CATHL2_10000184_MUNTJ,ENSBTAP00000003930-D1_GRUNN,ENSBTAT00000011364_BOVIN,Giraffe_…
CCDC72,LOH12CR1	NA	1	1	1	2	7	2	4	5	3	1	1	1	1	1	2	1	KB018134.1_cdsid_EPY74346.1_CAMEL,Deer_GLEAN_10015134_DAVID,Deer_GLEAN_10007721_DAVID,Muntiacus_muntjak_ccdc72_10017123_MUNTJ,Deer_GLEAN_10021223_DAVID,ENSSSCP00000012104_SWINE,Oryx_gazella_ccdc72_10022624_GAZEL,Muntiacus_muntjak_LOH12CR1_10010670_MUNTJ,ENSBTAP00000030207-D1_GRUNN,ENST00000438607_HUMAN,sheep_GLEAN_10021268_SHEEP,Giraffe_ccdc72_10005448_GIRAF,ENSBTAT00000030222_BOVIN,Giraffe_ccdc7…
CH1	GO:0005488; binding; Molecular Function.GO:0005576; extracellular region; Cellular Component	4	4	6	6	5	2	4	6	5	1	0	0	1	0	3	10	Muntiacus_muntjak_CH1_10008439_MUNTJ,ENSMUST00000166714_MOUSE,ENSBTAP00000031354-D1_GRUNN,PHO00002809_CHIRU,goat_GLEAN_10009932_GOATS,ENSMUST00000170232_MOUSE,ENSRNOT00000066292_RATTU,yakG021936_GRUNN,SHEEP_ENSBTAP00000047349_SHEEP,ENSMUST00000108083_MOUSE,Muntiacus_muntjak_CH1_10008436_MUNTJ,goat_GLEAN_10009934_GOATS,Giraffe_CH1_10017885_GIRAF,Deer_GLEAN_10002221_DAVID,goat_GLEAN_10009931_GOATS,…
CSDA,YBX2-B,YBX2,YBX1	GO:0003676; nucleic acid binding; Molecular Function.GO:0003677; DNA binding; Molecular Function.GO:0006355; regulation of transcription, DNA-dependent; Biological Process	2	4	6	4	1	3	4	3	2	1	0	1	0	0	0	0	goat_GLEAN_10006218_GOATS,KB016362.1_cdsid_EPY89976.1_CAMEL,Deer_GLEAN_10004230_DAVID,goat_GLEAN_10009580_GOATS,Giraffe_Csda_10000424_GIRAF,ENSBTAT00000005429_BOVIN,Muntiacus_muntjak_Csda_10015790_MUNTJ,GOAT_ENSBTAP00000005429_GOATS,sheep_GLEAN_10003187_SHEEP,PHO00022113_CHIRU,goat_GLEAN_10009581_GOATS,SHEEP_ENSBTAP00000005429_SHEEP,goat_GLEAN_10003551_GOATS,sheep_GLEAN_10003185_SHEEP,BACU013688_…
CTAGE5,CTAGE1	NA	4	4	3	6	2	1	4	6	5	1	0	9	0	0	0	0	sheep_GLEAN_10010298_SHEEP,sheep_GLEAN_10008706_SHEEP,KB017124.1_cdsid_EPY79975.1_CAMEL,PHO00002473_CHIRU,Giraffe_CTAGE5_10006927_GIRAF,KB018454.1_cdsid_EPY73758.1_CAMEL,Muntiacus_muntjak_CTAGE5_10018122_MUNTJ,KB016918.1_cdsid_EPY82504.1_CAMEL,Oryx_gazella_CTAGE5_10000304_GAZEL,Oryx_gazella_CTAGE5_10011998_GAZEL,KB016891.1_cdsid_EPY82838.1_CAMEL,KB017123.1_cdsid_EPY80025.1_CAMEL,KB019236.1_cdsid_…
DGAT2,MOGAT1,MOGAT2,MOGAT3,AWAT1,DGAT2L6,AWAT2,AC004876.1	GO:0016747; transferase activity, transferring acyl groups other than amino-acyl groups; Molecular Function	14	14	10	14	14	11	12	20	13	6	5	6	7	8	7	6	Muntiacus_muntjak_DGAT2_10000088_MUNTJ,Muntiacus_muntjak_MOGAT2_10012113_MUNTJ,ENST00000379421_HUMAN,goat_GLEAN_10008435_GOATS,Deer_GLEAN_10001170_DAVID,SHEEP_ENSBTAP00000026848_SHEEP,SHEEP_ENSBTAP00000049702_SHEEP,ENST00000333026_HUMAN,Muntiacus_muntjak_MOGAT3_10015063_MUNTJ,ENSRNOT00000022557_RATTU,ENSMUST00000033567_MOUSE,Giraffe_DGAT2_10017657_GIRAF,ENSBTAT00000065083_BOVIN,ENSECAT00000019515…
DMBT1,CD163,SRCRB4D,SSC5D,FCRL1,CD6,CD5L,CD163L1,RP11-108K14.4	GO:0005044; scavenger receptor activity; Molecular Function.GO:0016020; membrane; Cellular Component.GO:0005089; Rho guanyl-nucleotide exchange factor activity; Molecular Function.GO:0005391; sodium:potassium-exchanging ATPase activity; Molecular Function.GO:0005622; intracellular; Cellular Component.GO:0006754; ATP biosynthetic process; Biological Process.GO:0006813; potassium ion transport; Bio…	9	8	13	16	14	19	13	20	15	8	7	10	9	8	9	9	ENSBTAP00000051263-D17_GRUNN,Muntiacus_muntjak_NA_10001126_MUNTJ,Deer_GLEAN_10010719_DAVID,ENSMUST00000093984_MOUSE,ENSSSCP00000011500_SWINE,Muntiacus_muntjak_NA_10000539_MUNTJ,ENSBTAP00000051937-D55_GRUNN,ENSRNOT00000064975_RATTU,ENSECAT00000020695_HORSE,KB018282.1_cdsid_EPY74110.1_CAMEL,ENSECAT00000010270_HORSE,Giraffe_NA_10000582_GIRAF,Muntiacus_muntjak_NA_10014081_MUNTJ,Oryx_gazella_NA_100030…
EEF1B,EEF1B2	GO:0003746; translation elongation factor activity; Molecular Function.GO:0005853; eukaryotic translation elongation factor 1 complex; Cellular Component.GO:0006414; translational elongation; Biological Process	4	5	5	4	3	1	6	6	2	2	1	3	1	1	3	1	Deer_GLEAN_10023058_DAVID,Giraffe_EEF1B_10010621_GIRAF,Muntiacus_muntjak_EEF1B_10005279_MUNTJ,BACU014159_WHALE,Giraffe_EEF1B_10018589_GIRAF,Oryx_gazella_EEF1B_10020863_GAZEL,GOAT_ENSBTAP00000043761_GOATS,KB016846.1_cdsid_EPY83430.1_CAMEL,ENSECAT00000017481_HORSE,PHO00018051_CHIRU,Deer_GLEAN_10010290_DAVID,ENSRNOT00000048735_RATTU,Muntiacus_muntjak_eef1b_10000592_MUNTJ,ENSRNOT00000034740_RATTU,SHE…
HSFY1,MAGEA9,MAGEA10	GO:0003700; transcription factor activity; Molecular Function.GO:0005634; nucleus; Cellular Component.GO:0006355; regulation of transcription, DNA-dependent; Biological Process.GO:0043565; sequence-specific DNA binding; Molecular Function.GO:0003700; sequence-specific DNA binding transcription factor activity; Molecular Function.GO:0006508; proteolysis; Biological Process.GO:0016020; membrane; Ce…	1	4	6	3	4	6	8	10	5	1	1	1	3	0	0	0	Deer_GLEAN_10000347_DAVID,ENSBTAT00000063300_BOVIN,Giraffe_HSFY1_10000273_GIRAF,ENSSSCP00000013537_SWINE,BACU007782_WHALE,ENSBTAT00000048791_BOVIN,Oryx_gazella_HSFY1_10000972_GAZEL,ENSBTAT00000050846_BOVIN,Deer_GLEAN_10000595_DAVID,Oryx_gazella_HSFY1_10008573_GAZEL,Deer_GLEAN_10007754_DAVID,Deer_GLEAN_10001112_DAVID,Giraffe_HSFY1_10000197_GIRAF,Muntiacus_muntjak_NA_10000223_MUNTJ,GOAT_ENSBTAP0000…
LY9,SLAMF9,PPIA,SLAMF8,CD84	GO:0003755; peptidyl-prolyl cis-trans isomerase activity; Molecular Function.NA	2	1	5	7	0	0	5	7	5	1	0	1	0	0	0	0	Muntiacus_muntjak_Ly9_10006202_MUNTJ,Deer_GLEAN_10003299_DAVID,Giraffe_Ly9_10000701_GIRAF,goat_GLEAN_10014596_GOATS,Muntiacus_muntjak_Slamf8_10001302_MUNTJ,Oryx_gazella_NA_10003011_GAZEL,Oryx_gazella_Ly9_10003014_GAZEL,goat_GLEAN_10004015_GOATS,BACU003913_WHALE,Giraffe_LY9_10000321_GIRAF,Muntiacus_muntjak_Ly9_10006203_MUNTJ,Oryx_gazella_Slamf9_10001489_GAZEL,goat_GLEAN_10014594_GOATS,KB016457.1_c…
MAGEA9,MAGEA10,MAGEA8,MAGEA4,PIEZO2,MAGEA1	NA	10	12	11	7	18	14	35	28	10	7	5	4	2	0	0	0	ENSBTAP00000034243-D2_GRUNN,SHEEP_ENSBTAP00000045178-D2_SHEEP,ENSBTAT00000053176_BOVIN,Deer_GLEAN_10008270_DAVID,Deer_GLEAN_10001162_DAVID,Deer_GLEAN_10000393_DAVID,Deer_GLEAN_10001111_DAVID,Deer_GLEAN_10000186_DAVID,Muntiacus_muntjak_MAGEA9_10000078_MUNTJ,Muntiacus_muntjak_MAGEA10_10001449_MUNTJ,ENSBTAT00000048078_BOVIN,Giraffe_MAGEA9_10000256_GIRAF,Oryx_gazella_MAGEA10_10000639_GAZEL,Muntiacus_…
MYADM,MYADML2	GO:0016020; membrane; Cellular Component.NA.GO:0006457; protein folding; Biological Process.GO:0016272; prefoldin complex; Cellular Component.GO:0051082; unfolded protein binding; Molecular Function	25	29	32	36	23	17	23	25	20	5	7	9	2	2	3	2	ENSSSCP00000019400_SWINE,Oryx_gazella_MYADM_10000251_GAZEL,Deer_GLEAN_10011130_DAVID,Deer_GLEAN_10011128_DAVID,Giraffe_MYADM_10012765_GIRAF,GOAT_ENSBTAP00000013409-D25_GOATS,Oryx_gazella_MYADM_10004310_GAZEL,ENSBTAT00000036189_BOVIN,Oryx_gazella_MYADM_10001660_GAZEL,Oryx_gazella_MYADM_10012431_GAZEL,SHEEP_ENSBTAP00000000049_SHEEP,PHO00000122_CHIRU,ENSBTAP00000023688-D17_GRUNN,BACU016097_WHALE,PHO…
NA	NA	16	8	16	16	26	27	14	20	2	1	12	2	26	0	58	17	PHO00006184_CHIRU,ENSBTAT00000050022_BOVIN,Muntiacus_muntjak_NA_10000575_MUNTJ,ENSRNOT00000038303_RATTU,goat_GLEAN_10000511_GOATS,SHEEP_ENSBTAP00000019860_SHEEP,ENSRNOT00000048093_RATTU,Giraffe_NA_10007947_GIRAF,ENSRNOT00000068209_RATTU,Oryx_gazella_NA_10000331_GAZEL,ENSRNOT00000067131_RATTU,ENSSSCP00000020886_SWINE,Muntiacus_muntjak_NA_10002422_MUNTJ,PHO00017168_CHIRU,KB017601.1_cdsid_EPY76529.1…
NOP56	NA	1	1	2	4	4	1	8	5	12	3	0	1	0	0	0	0	Deer_GLEAN_10009287_DAVID,Giraffe_NOP56_10015754_GIRAF,Giraffe_NOP56_10015339_GIRAF,PHO00002675_CHIRU,BACU013672_WHALE,ENSP00000402050-D8_GRUNN,Giraffe_NOP56_10001227_GIRAF,Oryx_gazella_NOP56_10012548_GAZEL,sheep_GLEAN_10017533_SHEEP,Giraffe_NOP56_10002048_GIRAF,Giraffe_NOP56_10003557_GIRAF,Muntiacus_muntjak_NOP56_10023488_MUNTJ,Oryx_gazella_NOP56_10006243_GAZEL,ENSP00000402050-D12_GRUNN,Muntiacu…
OR12D2,OR5V1,OR12D3,TDP1	GO:0004984; olfactory receptor activity; Molecular Function.GO:0007186; G-protein coupled receptor protein signaling pathway; Biological Process.GO:0016021; integral to membrane; Cellular Component.GO:0005634; nucleus; Cellular Component.GO:0006281; DNA repair; Biological Process.GO:0008081; phosphoric diester hydrolase activity; Molecular Function.GO:0001619; lysosphingolipid and lysophosphatidi…	15	12	16	10	18	14	13	13	5	1	13	3	9	3	11	8	ENSSSCP00000001357_SWINE,SHEEP_ENSP00000415545_SHEEP,Muntiacus_muntjak_OR5V1_10004260_MUNTJ,ENSRNOT00000050276_RATTU,Oryx_gazella_OR12D3_10010091_GAZEL,ENSSSCP00000019943_SWINE,ENSBTAP00000052919-D2_GRUNN,PHO00010933_CHIRU,ENSECAT00000005844_HORSE,yakA08654_GRUNN,Muntiacus_muntjak_TDP1_10000503_MUNTJ,ENSSSCP00000001356_SWINE,goat_GLEAN_10000762_GOATS,goat_GLEAN_10001400_GOATS,Deer_GLEAN_10003738_…
OR1J4,OR8S1,OR3A2,OR10G2,OR6M1,OR1L8,OR1L1,OR10X1,OR10H4,ZNF496,OR10D4P,OR12D2,OR10C1,OR2AP1,OR6C2,OLFR5,OR6C76,VWA5A,OR1L6,OR5AN1	GO:0004984; olfactory receptor activity; Molecular Function.GO:0007186; G-protein coupled receptor protein signaling pathway; Biological Process.GO:0016021; integral to membrane; Cellular Component.GO:0003676; nucleic acid binding; Molecular Function.GO:0005622; intracellular; Cellular Component.GO:0006355; regulation of transcription, DNA-dependent; Biological Process.GO:0008270; zinc ion bindin…	0	0	0	10	0	0	5	14	9	0	0	5	0	0	0	0	Oryx_gazella_OR10G2_10008003_GAZEL,Oryx_gazella_ZNF496_10006993_GAZEL,KB016641.1_cdsid_EPY85723.1_CAMEL,Deer_GLEAN_10000813_DAVID,Muntiacus_muntjak_OR10D4P_10023305_MUNTJ,Giraffe_OR1J4_10006130_GIRAF,Giraffe_OR8S1_10018764_GIRAF,Oryx_gazella_OR1L1_10012557_GAZEL,Giraffe_OR3A2_10019320_GIRAF,Oryx_gazella_OR6M1_10012106_GAZEL,Muntiacus_muntjak_OR6C2_10023002_MUNTJ,Muntiacus_muntjak_OR10G2_10005769_…
OR2Z1,OR2AG1,OR2V1,OR2T29,OR2V2,OR2T3,OR2T2,OR2M2,OR2M4,OR2T1,OR2T27,OR2T12,OR2T6,OR2T34,OR2T8,OR2T33,OR2T4,OR2T11,OR2M3,OR2AG2,OR2T35,OR2M7,OR2T5,OR2M5,OR2T10	GO:0004984; olfactory receptor activity; Molecular Function.GO:0007186; G-protein coupled receptor protein signaling pathway; Biological Process.GO:0016021; integral to membrane; Cellular Component.GO:0000786; nucleosome; Cellular Component.GO:0003677; DNA binding; Molecular Function.GO:0005634; nucleus; Cellular Component.GO:0006334; nucleosome assembly; Biological Process.GO:0006352; transcript…	36	37	35	30	42	36	36	31	18	3	36	19	32	25	34	30	ENSBTAT00000028103_BOVIN,Oryx_gazella_OR2T8_10006980_GAZEL,ENSECAT00000001502_HORSE,ENSECAT00000001314_HORSE,ENSP00000324687-D2_GRUNN,ENSP00000355431-D2_GRUNN,ENST00000359682_HUMAN,ENSECAT00000001181_HORSE,ENSRNOT00000051126_RATTU,ENSBTAT00000064254_BOVIN,Oryx_gazella_OR2T2_10006982_GAZEL,Muntiacus_muntjak_OR2V2_10002874_MUNTJ,SHEEP_ENSBTAP00000050260_SHEEP,BACU004873_WHALE,ENSRNOT00000050693_RAT…
OR4A15,OR4C46,OR4A47,OLFR140,OR4C15,OR4C13,OR4C12,OR4C45,OR4C6,OR4A4P,OR4A16,OR4C3,OR4C5,OR4A5	GO:0004984; olfactory receptor activity; Molecular Function.GO:0007186; G-protein coupled receptor protein signaling pathway; Biological Process.GO:0016021; integral to membrane; Cellular Component	21	34	13	22	65	34	64	42	7	0	26	39	9	11	56	55	Deer_GLEAN_10005530_DAVID,Deer_GLEAN_10003622_DAVID,Muntiacus_muntjak_OR4C46_10021749_MUNTJ,Deer_GLEAN_10012468_DAVID,Deer_GLEAN_10003888_DAVID,ENSRNOT00000049678_RATTU,Oryx_gazella_Olfr140_10000481_GAZEL,ENSBTAT00000063970_BOVIN,ENSRNOT00000047910_RATTU,sheep_GLEAN_10012443_SHEEP,Muntiacus_muntjak_OR4C46_10001089_MUNTJ,ENSSSCP00000015425_SWINE,Oryx_gazella_OR4C46_10001387_GAZEL,ENSSSCP0000002323…
OR51F2,OR51L1,OR51G2,OR51I2,OR51A4,OR51I1,OR51F1,OR51H1P,OR51A7,OR51G1,OR51J1,OR52K2,OR52K1,OR51T1,OR51A2,AC103710.1,OR51C1P	GO:0004984; olfactory receptor activity; Molecular Function.GO:0007186; G-protein coupled receptor protein signaling pathway; Biological Process.GO:0016021; integral to membrane; Cellular Component.GO:0004977; melanocortin receptor activity; Molecular Function	37	34	33	34	53	35	37	44	29	3	34	30	32	14	27	31	PHO00020943_CHIRU,ENSSSCP00000023982_SWINE,Oryx_gazella_OR51I2_10004209_GAZEL,Deer_GLEAN_10018945_DAVID,ENSSSCP00000015698_SWINE,SHEEP_ENSP00000318956-D4_SHEEP,ENSBTAT00000026039_BOVIN,SHEEP_ENSBTAP00000048734_SHEEP,PHO00021023_CHIRU,KB016421.1_cdsid_EPY89270.1_CAMEL,Muntiacus_muntjak_OR51I2_10003253_MUNTJ,ENSMUST00000051505_MOUSE,Muntiacus_muntjak_OR51F1_10003247_MUNTJ,PHO00020925_CHIRU,ENSBTAT0…
OR7A10,OR7A17,OR7C2,OR7A5,OR7A2P	GO:0004984; olfactory receptor activity; Molecular Function.GO:0007186; G-protein coupled receptor protein signaling pathway; Biological Process.GO:0016021; integral to membrane; Cellular Component.GO:0003735; structural constituent of ribosome; Molecular Function.GO:0005622; intracellular; Cellular Component.GO:0005840; ribosome; Cellular Component.GO:0006412; translation; Biological Process	48	28	21	21	66	40	43	21	13	1	32	9	9	4	11	8	Oryx_gazella_OR7A17_10007107_GAZEL,SHEEP_ENSP00000328144-D3_SHEEP,ENSBTAT00000064850_BOVIN,GOAT_ENSBTAP00000046656-D5_GOATS,PHO00009347_CHIRU,PHO00009364_CHIRU,Giraffe_OR7A10_10003246_GIRAF,Oryx_gazella_OR7A10_10006898_GAZEL,Oryx_gazella_OR7A17_10001232_GAZEL,ENSBTAT00000063735_BOVIN,ENSSSCP00000023768_SWINE,ENSBTAT00000054308_BOVIN,ENSBTAP00000050927-D68_GRUNN,ENSP00000303195-D78_GRUNN,Oryx_gaze…
OR8G2,OR8A1,OR8G5,OLFR151,OR8G1,OR8D4,OR8D2,OR8D1	GO:0004984; olfactory receptor activity; Molecular Function.GO:0007186; G-protein coupled receptor protein signaling pathway; Biological Process.GO:0016021; integral to membrane; Cellular Component	20	20	21	14	27	22	25	21	11	4	10	4	16	4	30	34	ENSSSCP00000016104_SWINE,GOAT_ENSBTAP00000044802-D2_GOATS,ENST00000357438_HUMAN,Giraffe_OR8G2_10001406_GIRAF,Deer_GLEAN_10002940_DAVID,ENSP00000357126-D76_GRUNN,Giraffe_OR8A1_10009178_GIRAF,BACU010218_WHALE,Deer_GLEAN_10004546_DAVID,SHEEP_ENSBTAP00000034399-D2_SHEEP,PHO00003249_CHIRU,ENSSSCP00000023007_SWINE,GOAT_ENSBTAP00000044802-D7_GOATS,ENSBTAP00000051687-D24_GRUNN,sheep_GLEAN_10010417_SHEEP,…
PAG2,PGA,PAG,PAG1,CYM,REN,PGC,CTSD,PGA3,PGA5,PGA4,CTSE	GO:0004190; aspartic-type endopeptidase activity; Molecular Function.GO:0006508; proteolysis; Biological Process.GO:0009607; response to biotic stimulus; Biological Process.GO:0016021; integral to membrane; Cellular Component	17	39	40	22	52	56	41	29	19	7	15	7	12	7	7	7	GOAT_ENSBTAP00000030228-D19_GOATS,ENSSSCP00000013931_SWINE,ENSSSCP00000013924_SWINE,GOAT_ENSBTAP00000030448-D33_GOATS,ENSBTAP00000030173-D15_GRUNN,ENST00000325558_HUMAN,SHEEP_ENSBTAP00000030228_SHEEP,Giraffe_PAG2_10000171_GIRAF,SHEEP_ENSBTAP00000030448-D8_SHEEP,Deer_GLEAN_10000310_DAVID,Deer_GLEAN_10000150_DAVID,ENSSSCP00000023039_SWINE,ENSSSCP00000013930_SWINE,Muntiacus_muntjak_PGC_10006737_MUNT…
PRAMEF24,PRAMEF12,PRAMEF9,PRAME,LRRC14,PRAMEL,PRAMEF7,PRAMEF4,PRAMEF20,WI2-2994D6.2,PRAMEF1,PRAMEF18,PRAMEF2,PRAMEF10,PRAMEF6,PRAMEF11,PRAMEF17,PRAMEF14,PRAMEF22,PRAMEF13,PRAMEF21,PRAMEF8,PRAMEF5,PRAMEF19,PRAMEF16,PRAMEF15,PRAMEF3	GO:0003677; DNA binding; Molecular Function.GO:0005634; nucleus; Cellular Component.GO:0005515; protein binding; Molecular Function.GO:0008152; metabolic process; Biological Process.GO:0008168; methyltransferase activity; Molecular Function.NA	23	21	23	13	20	25	24	20	19	9	7	11	6	25	36	100	ENST00000423177_HUMAN,SHEEP_ENSBTAP00000050906-D3_SHEEP,ENSBTAP00000006879-D1_GRUNN,ENSBTAT00000038910_BOVIN,ENSRNOT00000057697_RATTU,GOAT_ENSBTAP00000001607-D3_GOATS,ENSBTAT00000053689_BOVIN,ENSBTAT00000020712_BOVIN,ENSBTAP00000040134-D1_GRUNN,ENSRNOT00000068306_RATTU,ENSECAT00000010699_HORSE,ENSECAT00000014941_HORSE,ENSMUST00000111572_MOUSE,ENSMUST00000053304_MOUSE,ENST00000332296_HUMAN,Giraffe…
PRDM7,PRDM9	GO:0003676; nucleic acid binding; Molecular Function.GO:0005622; intracellular; Cellular Component.GO:0005634; nucleus; Cellular Component.GO:0006355; regulation of transcription, DNA-dependent; Biological Process.GO:0005515; protein binding; Molecular Function	5	1	3	3	4	3	10	7	3	0	0	1	1	1	0	0	Muntiacus_muntjak_PRDM9_10005150_MUNTJ,Muntiacus_muntjak_PRDM7_10000227_MUNTJ,GOAT_ENSBTAP00000013106_GOATS,Deer_GLEAN_10023358_DAVID,PHO00005103_CHIRU,Deer_GLEAN_10004313_DAVID,Giraffe_PRDM7_10000205_GIRAF,Muntiacus_muntjak_PRDM9_10000965_MUNTJ,GOAT_ENSBTAP00000047652_GOATS,ENSBTAP00000005175-D2_GRUNN,Deer_GLEAN_10001769_DAVID,Deer_GLEAN_10009054_DAVID,Deer_GLEAN_10000335_DAVID,Giraffe_PRDM9_100…
PRP3,PRL,PRP2,CSH1,CSH,PRP4,PRP1	GO:0005179; hormone activity; Molecular Function.GO:0005576; extracellular region; Cellular Component	9	10	13	11	12	14	19	8	4	1	1	1	1	1	25	26	ENSBTAP00000011706-D9_GRUNN,Giraffe_PRP3_10015857_GIRAF,Oryx_gazella_CSH_10014487_GAZEL,ENSMUST00000006659_MOUSE,ENSRNOT00000023086_RATTU,ENSRNOT00000022447_RATTU,ENSBTAT00000017916_BOVIN,ENSRNOT00000023412_RATTU,Deer_GLEAN_10002269_DAVID,PHO00002519_CHIRU,ENSMUST00000006664_MOUSE,SHEEP_ENSBTAP00000015116_SHEEP,Oryx_gazella_PRP3_10020298_GAZEL,ENSBTAP00000025750-D8_GRUNN,Muntiacus_muntjak_CSH1_10…
RAN,RASL2-9	GO:0003924; GTPase activity; Molecular Function.GO:0005515; protein binding; Molecular Function.GO:0005525; GTP binding; Molecular Function.GO:0005622; intracellular; Cellular Component.GO:0006886; intracellular protein transport; Biological Process.GO:0006913; nucleocytoplasmic transport; Biological Process.GO:0007165; signal transduction; Biological Process.GO:0007264; small GTPase mediated sig…	8	6	6	10	10	2	18	9	6	6	1	2	1	1	3	3	Oryx_gazella_Ran_10022521_GAZEL,Oryx_gazella_Ran_10010673_GAZEL,Deer_GLEAN_10021843_DAVID,BACU019997_WHALE,Oryx_gazella_Ran_10006364_GAZEL,SHEEP_ENSBTAP00000040715_SHEEP,ENSMUST00000029955_MOUSE,Giraffe_Ran_10011000_GIRAF,BACU014596_WHALE,Oryx_gazella_Ran_10004630_GAZEL,Oryx_gazella_Ran_10015505_GAZEL,Oryx_gazella_ran_10005647_GAZEL,KB017776.1_cdsid_EPY75534.1_CAMEL,PHO00015227_CHIRU,Muntiacus_mu…
RPL10,RPL10L	GO:0003735; structural constituent of ribosome; Molecular Function.GO:0005622; intracellular; Cellular Component.GO:0005840; ribosome; Cellular Component.GO:0006412; translation; Biological Process.GO:0016021; integral to membrane; Cellular Component	7	17	12	9	8	5	32	18	19	9	1	10	2	2	4	3	GOAT_ENSBTAP00000000802_GOATS,KB017742.1_cdsid_EPY75684.1_CAMEL,Deer_GLEAN_10007223_DAVID,Giraffe_RPL10_10009957_GIRAF,Deer_GLEAN_10002698_DAVID,Deer_GLEAN_10003246_DAVID,KB017488.1_cdsid_EPY77248.1_CAMEL,Giraffe_RPL10_10004833_GIRAF,KB016675.1_cdsid_EQB77516.1_CAMEL,Oryx_gazella_RPL10_10005554_GAZEL,ENSBTAT00000063980_BOVIN,Giraffe_RPL10_10019836_GIRAF,yakG005112_GRUNN,Giraffe_RPL10_10012068_GIR…
RPL10A	GO:0003723; RNA binding; Molecular Function.GO:0006396; RNA processing; Biological Process	7	11	9	11	6	3	12	9	10	4	6	5	1	1	6	2	ENSRNOT00000045023_RATTU,yakA14197_GRUNN,ENSP00000363018-D6_GRUNN,ENSP00000382780-D2_GRUNN,goat_GLEAN_10013171_GOATS,ENSECAT00000014713_HORSE,Deer_GLEAN_10018308_DAVID,sheep_GLEAN_10009276_SHEEP,ENSSSCP00000022559_SWINE,ENSBTAP00000025963-D5_GRUNN,Muntiacus_muntjak_Rpl10a_10011807_MUNTJ,Deer_GLEAN_10019965_DAVID,Oryx_gazella_Rpl10a_10005064_GAZEL,Muntiacus_muntjak_Rpl10a_10021024_MUNTJ,ENSSSCP000…
RPL17	GO:0003735; structural constituent of ribosome; Molecular Function.GO:0005622; intracellular; Cellular Component.GO:0005840; ribosome; Cellular Component.GO:0006412; translation; Biological Process.GO:0015934; large ribosomal subunit; Cellular Component	7	25	19	10	20	10	35	24	11	14	1	6	1	1	11	8	ENSRNOT00000049695_RATTU,BACU000772_WHALE,ENSBTAT00000042617_BOVIN,Oryx_gazella_Rpl17_10017143_GAZEL,sheep_GLEAN_10013712_SHEEP,Muntiacus_muntjak_RPL17_10012205_MUNTJ,sheep_GLEAN_10001559_SHEEP,ENSBTAP00000051262-D9_GRUNN,Deer_GLEAN_10010956_DAVID,BACU007029_WHALE,Deer_GLEAN_10021825_DAVID,BACU017657_WHALE,BACU016838_WHALE,Muntiacus_muntjak_Rpl17_10014205_MUNTJ,Deer_GLEAN_10019228_DAVID,sheep_GLE…
RPL23A,AC139099.1	GO:0003735; structural constituent of ribosome; Molecular Function.GO:0005622; intracellular; Cellular Component.GO:0005840; ribosome; Cellular Component.GO:0006412; translation; Biological Process	3	17	16	12	23	8	20	13	27	4	2	14	3	2	15	19	Giraffe_Rpl23a_10000913_GIRAF,Muntiacus_muntjak_Rpl23a_10021222_MUNTJ,ENST00000422514_HUMAN,ENSBTAP00000050420-D10_GRUNN,Giraffe_Rpl23a_10013033_GIRAF,sheep_GLEAN_10007674_SHEEP,GOAT_ENSP00000400635_GOATS,Deer_GLEAN_10021128_DAVID,Deer_GLEAN_10017385_DAVID,sheep_GLEAN_10020449_SHEEP,ENSRNOT00000051510_RATTU,ENSP00000415110-D3_GRUNN,goat_GLEAN_10020666_GOATS,KB016867.1_cdsid_EPY83153.1_CAMEL,KB019…
RPL7,RPL7L1	GO:0003735; structural constituent of ribosome; Molecular Function.GO:0005622; intracellular; Cellular Component.GO:0005840; ribosome; Cellular Component.GO:0006412; translation; Biological Process.GO:0007186; G-protein coupled receptor protein signaling pathway; Biological Process.GO:0016021; integral to membrane; Cellular Component.GO:0004672; protein kinase activity; Molecular Function.GO:0004…	15	15	15	12	12	5	20	15	14	7	3	2	3	2	16	5	goat_GLEAN_10006333_GOATS,Oryx_gazella_RPL7_10008706_GAZEL,Giraffe_RPL7_10003357_GIRAF,Oryx_gazella_RPL7_10008791_GAZEL,Muntiacus_muntjak_RPL7_10005439_MUNTJ,Deer_GLEAN_10008170_DAVID,goat_GLEAN_10020517_GOATS,Muntiacus_muntjak_RPL7L1_10021480_MUNTJ,goat_GLEAN_10003610_GOATS,BACU009775_WHALE,Deer_GLEAN_10007789_DAVID,Oryx_gazella_RPL7_10008127_GAZEL,ENSRNOT00000021803_RATTU,ENSMUST00000027054_MOU…
RPS6	GO:0003735; structural constituent of ribosome; Molecular Function.GO:0005622; intracellular; Cellular Component.GO:0005840; ribosome; Cellular Component.GO:0006412; translation; Biological Process	14	6	12	11	10	5	16	10	4	4	4	3	1	1	6	3	Oryx_gazella_Rps6_10020873_GAZEL,ENSBTAP00000050324-D16_GRUNN,ENSBTAT00000024234_BOVIN,Muntiacus_muntjak_Rps6_10023968_MUNTJ,sheep_GLEAN_10015342_SHEEP,goat_GLEAN_10019528_GOATS,Deer_GLEAN_10019685_DAVID,BACU006605_WHALE,ENSMUST00000102814_MOUSE,goat_GLEAN_10009760_GOATS,KB016762.1_cdsid_EPY84384.1_CAMEL,sheep_GLEAN_10009331_SHEEP,KB017331.1_cdsid_EQB78775.1_CAMEL,Muntiacus_muntjak_Rps6_10011972_…
SLC7A3,ZNF331,SLC7A1,SLC7A2,SLC7A4,SLC7A14	GO:0006810; transport; Biological Process.GO:0006865; amino acid transport; Biological Process.GO:0015171; amino acid transmembrane transporter activity; Molecular Function.GO:0016020; membrane; Cellular Component.GO:0055085; transmembrane transport; Biological Process.GO:0003676; nucleic acid binding; Molecular Function.GO:0005622; intracellular; Cellular Component.GO:0006355; regulation of tran…	13	19	17	23	27	18	16	23	14	6	11	9	18	5	5	6	ENSP00000370128-D1_GRUNN,sheep_GLEAN_10005705_SHEEP,Oryx_gazella_SLC7A3_10000718_GAZEL,SHEEP_ENSBTAP00000031960_SHEEP,Muntiacus_muntjak_SLC7A3_10004000_MUNTJ,ENSBTAT00000020051_BOVIN,Giraffe_SLC7A3_10006297_GIRAF,ENSBTAP00000019910-D25_GRUNN,Giraffe_SLC7A3_10003871_GIRAF,SHEEP_ENSBTAP00000019910_SHEEP,ENSBTAP00000023823-D2_GRUNN,SHEEP_ENSBTAP00000012050_SHEEP,Oryx_gazella_SLC7A3_10000765_GAZEL,KB…
SSU72	GO:0004721; phosphoprotein phosphatase activity; Molecular Function.GO:0005634; nucleus; Cellular Component.GO:0006397; mRNA processing; Biological Process	5	4	9	6	10	7	5	9	11	3	3	3	2	1	1	1	ENSP00000398079-D1_GRUNN,Oryx_gazella_NA_10020716_GAZEL,ENSBTAP00000042698-D5_GRUNN,ENSBTAP00000025591-D13_GRUNN,Giraffe_NA_10017580_GIRAF,ENSP00000393018-D8_GRUNN,Giraffe_NA_10017576_GIRAF,Oryx_gazella_NA_10000026_GAZEL,SHEEP_ENSBTAP00000003331_SHEEP,goat_GLEAN_10010919_GOATS,Muntiacus_muntjak_NA_10000487_MUNTJ,Giraffe_ssu72_10000070_GIRAF,KB016496.1_cdsid_EPY87992.1_CAMEL,Deer_GLEAN_10019002_DA…
TCRA	NA	23	8	14	16	31	9	16	18	4	3	9	9	14	0	15	8	ENSECAT00000016140_HORSE,ENSRNOT00000065159_RATTU,ENSBTAP00000052737-D1_GRUNN,goat_GLEAN_10000173_GOATS,ENSRNOT00000048915_RATTU,GOAT_ENSBTAP00000017034-D2_GOATS,PHO00017183_CHIRU,Muntiacus_muntjak_NA_10000263_MUNTJ,ENSECAT00000015922_HORSE,goat_GLEAN_10001909_GOATS,ENSP00000374959-D4_GRUNN,Muntiacus_muntjak_NA_10000489_MUNTJ,PHO00017179_CHIRU,ENSRNOT00000060396_RATTU,PHO00002621_CHIRU,ENSRNOT000…
TCRA,TRAV26-2	NA	6	1	4	11	11	0	8	4	3	0	2	1	7	1	2	1	Giraffe_NA_10007938_GIRAF,Deer_GLEAN_10000781_DAVID,Giraffe_NA_10001087_GIRAF,PHO00000924_CHIRU,Muntiacus_muntjak_NA_10002421_MUNTJ,ENSP00000374967-D12_GRUNN,ENSP00000374967-D3_GRUNN,ENSSSCP00000002254_SWINE,ENSP00000374844-D65_GRUNN,ENSP00000374962-D16_GRUNN,ENSECAT00000014264_HORSE,ENSECAT00000004085_HORSE,Oryx_gazella_NA_10000726_GAZEL,ENSSSCP00000002279_SWINE,ENSECAT00000013165_HORSE,Oryx_gaz…
TRIM64,TRIM64B,TRIM43,SPRYD5,TRIM49,TRIM48,TRIM64C,AC084851.1,TRIM49L2	GO:0005515; protein binding; Molecular Function.GO:0005622; intracellular; Cellular Component.GO:0008270; zinc ion binding; Molecular Function.GO:0003676; nucleic acid binding; Molecular Function	10	8	11	12	9	7	9	8	13	4	8	1	3	8	1	3	sheep_GLEAN_10006665_SHEEP,Deer_GLEAN_10013991_DAVID,goat_GLEAN_10006280_GOATS,PHO00013241_CHIRU,GOAT_ENSBTAP00000023885_GOATS,goat_GLEAN_10001132_GOATS,Deer_GLEAN_10013998_DAVID,ENSBTAT00000057203_BOVIN,ENSMUST00000163255_MOUSE,Deer_GLEAN_10014001_DAVID,Oryx_gazella_TRIM64_10002444_GAZEL,GOAT_ENSP00000345090_GOATS,Oryx_gazella_TRIM64_10000998_GAZEL,Muntiacus_muntjak_TRIM64_10023050_MUNTJ,PHO0001…
ULBP3,ULBP1,RAET1E,RAET1G,ULBP2,RAET1L	GO:0006955; immune response; Biological Process.GO:0016020; membrane; Cellular Component.GO:0019882; antigen processing and presentation; Biological Process.GO:0042612; MHC class I protein complex; Cellular Component	6	7	9	4	10	15	6	7	7	0	5	0	6	6	0	0	Muntiacus_muntjak_ULBP1_10001147_MUNTJ,PHO00008011_CHIRU,ENSBTAP00000046694-D2_GRUNN,GOAT_ENSBTAP00000011321_GOATS,ENSBTAT00000002400_BOVIN,ENSBTAP00000048357-D1_GRUNN,Deer_GLEAN_10001975_DAVID,Deer_GLEAN_10001973_DAVID,Muntiacus_muntjak_ULBP1_10000444_MUNTJ,ENSBTAT00000064751_BOVIN,ENSBTAT00000034023_BOVIN,ENST00000399812_HUMAN,Oryx_gazella_ULBP3_10000432_GAZEL,ENSBTAT00000037567_BOVIN,Deer_GLEA…
V-TCR,TCRB,TRBV12-3,TRBV23OR9-2,TRBV21OR9-2	NA	27	27	29	12	37	21	16	16	15	6	5	9	25	2	4	6	sheep_GLEAN_10000160_SHEEP,ENSBTAP00000050023-D3_GRUNN,ENSBTAT00000053610_BOVIN,ENSBTAP00000048427-D37_GRUNN,sheep_GLEAN_10000149_SHEEP,SHEEP_ENSP00000374915-D4_SHEEP,Giraffe_NA_10001250_GIRAF,ENSECAT00000000871_HORSE,goat_GLEAN_10001021_GOATS,PHO00019524_CHIRU,PHO00019506_CHIRU,SHEEP_ENSBTAP00000052911-D2_SHEEP,Muntiacus_muntjak_NA_10003095_MUNTJ,PHO00019538_CHIRU,Giraffe_V-TCR_10001243_GIRAF,SH…
V-TCR,TRBV25OR9-2,TRBV24-1	NA	19	14	20	14	24	17	20	18	18	4	7	8	15	2	3	0	PHO00019550_CHIRU,KB017062.1_cdsid_EPY80729.1_CAMEL,ENSECAT00000012089_HORSE,ENSP00000374916-D33_GRUNN,Muntiacus_muntjak_NA_10003085_MUNTJ,Giraffe_NA_10001241_GIRAF,Muntiacus_muntjak_NA_10000925_MUNTJ,ENSBTAT00000052434_BOVIN,Muntiacus_muntjak_V-TCR_10003094_MUNTJ,SHEEP_ENSBTAP00000048104-D2_SHEEP,ENSBTAT00000055640_BOVIN,ENSBTAP00000049607-D1_GRUNN,ENSECAT00000007502_HORSE,Deer_GLEAN_10001959_DA…

## Sheet: CetaRum_contractions
Cetacea and Ruminant gene contractions
symbol	GO annotation	Pantholops hodgsonii	Ovis aries	Capra hircus	Oryx gazella	Bos grunniens	Bos taurus	Elaphurus davidianus	Muntiacus muntjak	Giraffa camelopardalis	Balaenoptera acutorostrata	Sus scrofa	Camelus ferus	Equus caballus	Homo sapiens	Rattus norvegicus	Mus musculus	Gene cluster
OR6C4,OR6C76,OR6C1,OR2AP1,OR6C2,OR6C75,OR6C3,OR6C74,OR6C68,OR6C70,OR6C65,OR6C6	GO:0003924; GTPase activity; Molecular Function.GO:0004984; olfactory receptor activity; Molecular Function.GO:0005525; GTP binding; Molecular Function.GO:0007186; G-protein coupled receptor protein signaling pathway; Biological Process.GO:0016021; integral to membrane; Cellular Component.GO:0003746; translation elongation factor activity; Molecular Function.GO:0005853; eukaryotic translation elo…	51	34	32	22	60	44	22	5	9	1	54	16	53	12	70	48	ENSSSCP00000000364_SWINE,ENSBTAP00000008284-D24_GRUNN,ENSRNOT00000043396_RATTU,ENSBTAT00000044037_BOVIN,ENSSSCP00000020554_SWINE,Deer_GLEAN_10000469_DAVID,ENSRNOT00000012866_RATTU,ENSRNOT00000049493_RATTU,PHO00015856_CHIRU,SHEEP_ENSBTAP00000051071-D3_SHEEP,PHO00015918_CHIRU,Deer_GLEAN_10003236_DAVID,ENSSSCP00000022081_SWINE,ENSBTAT00000055881_BOVIN,ENSMUST00000076508_MOUSE,ENSRNOT00000051053_RATT…

## Sheet: CetaRum_expansions
Cetacea and Ruminant gene expansions
symbol	GO annotation	Pantholops hodgsonii	Ovis aries	Capra hircus	Oryx gazella	Bos grunniens	Bos taurus	Elaphurus davidianus	Muntiacus muntjak	Giraffa camelopardalis	Balaenoptera acutorostrata	Sus scrofa	Camelus ferus	Equus caballus	Homo sapiens	Rattus norvegicus	Mus musculus	Gene cluster
HNRNPA2B1,HNRNPA1,HNRNPA3	GO:0003676; nucleic acid binding; Molecular Function	0	2	4	2	0	0	6	2	4	3	1	1	0	0	2	0	Deer_GLEAN_10016196_DAVID,goat_GLEAN_10013211_GOATS,Giraffe_Hnrnpa2b1_10006485_GIRAF,ENSRNOT00000061073_RATTU,Oryx_gazella_Hnrnpa3_10011075_GAZEL,ENSSSCP00000005824_SWINE,BACU014340_WHALE,BACU009441_WHALE,sheep_GLEAN_10012793_SHEEP,goat_GLEAN_10012305_GOATS,Giraffe_HNRNPA1_10002459_GIRAF,Oryx_gazella_HNRNPA1_10004125_GAZEL,BACU009899_WHALE,goat_GLEAN_10007956_GOATS,Muntiacus_muntjak_HNRNPA1_10003…
RPS20	GO:0003735; structural constituent of ribosome; Molecular Function.GO:0005622; intracellular; Cellular Component.GO:0005840; ribosome; Cellular Component.GO:0006412; translation; Biological Process	2	1	1	2	2	1	11	8	6	8	2	1	1	1	3	1	PHO00002879_CHIRU,Deer_GLEAN_10012648_DAVID,Deer_GLEAN_10007916_DAVID,BACU010830_WHALE,BACU014435_WHALE,BACU020492_WHALE,Deer_GLEAN_10023667_DAVID,Deer_GLEAN_10012897_DAVID,Deer_GLEAN_10007060_DAVID,Oryx_gazella_Rps20_10022492_GAZEL,Muntiacus_muntjak_Rps20_10009241_MUNTJ,Giraffe_Rps20_10004631_GIRAF,Giraffe_Rps20_10015398_GIRAF,PHO00011367_CHIRU,Deer_GLEAN_10018856_DAVID,Deer_GLEAN_10019601_DAVID…
NOP56	NA	1	1	2	4	4	1	8	5	12	3	0	1	0	0	0	0	Deer_GLEAN_10009287_DAVID,Giraffe_NOP56_10015754_GIRAF,Giraffe_NOP56_10015339_GIRAF,PHO00002675_CHIRU,BACU013672_WHALE,ENSP00000402050-D8_GRUNN,Giraffe_NOP56_10001227_GIRAF,Oryx_gazella_NOP56_10012548_GAZEL,sheep_GLEAN_10017533_SHEEP,Giraffe_NOP56_10002048_GIRAF,Giraffe_NOP56_10003557_GIRAF,Muntiacus_muntjak_NOP56_10023488_MUNTJ,Oryx_gazella_NOP56_10006243_GAZEL,ENSP00000402050-D12_GRUNN,Muntiacu…
RPL17	GO:0003735; structural constituent of ribosome; Molecular Function.GO:0005622; intracellular; Cellular Component.GO:0005840; ribosome; Cellular Component.GO:0006412; translation; Biological Process.GO:0015934; large ribosomal subunit; Cellular Component	7	25	19	10	20	10	35	24	11	14	1	6	1	1	11	8	ENSRNOT00000049695_RATTU,BACU000772_WHALE,ENSBTAT00000042617_BOVIN,Oryx_gazella_Rpl17_10017143_GAZEL,sheep_GLEAN_10013712_SHEEP,Muntiacus_muntjak_RPL17_10012205_MUNTJ,sheep_GLEAN_10001559_SHEEP,ENSBTAP00000051262-D9_GRUNN,Deer_GLEAN_10010956_DAVID,BACU007029_WHALE,Deer_GLEAN_10021825_DAVID,BACU017657_WHALE,BACU016838_WHALE,Muntiacus_muntjak_Rpl17_10014205_MUNTJ,Deer_GLEAN_10019228_DAVID,sheep_GLE…
GCSH	GO:0005739; mitochondrion; Cellular Component.GO:0005960; glycine cleavage complex; Cellular Component.GO:0006546; glycine catabolic process; Biological Process	6	5	5	6	6	6	10	4	3	10	1	1	1	1	1	1	Muntiacus_muntjak_GCSH_10022532_MUNTJ,PHO00008775_CHIRU,ENSECAT00000029000_HORSE,PHO00001749_CHIRU,Muntiacus_muntjak_GCSH_10008050_MUNTJ,Giraffe_GCSH_10001917_GIRAF,Deer_GLEAN_10022563_DAVID,ENSBTAT00000008936_BOVIN,ENSBTAT00000057090_BOVIN,BACU009726_WHALE,goat_GLEAN_10000632_GOATS,GOAT_ENSBTAP00000051146_GOATS,Oryx_gazella_GCSH_10017152_GAZEL,Oryx_gazella_GCSH_10006399_GAZEL,ENSBTAP00000049058-…
ATP5L,ATP5L2	GO:0000276; mitochondrial proton-transporting ATP synthase complex, coupling factor F(o); Cellular Component.GO:0015078; hydrogen ion transmembrane transporter activity; Molecular Function.GO:0015986; ATP synthesis coupled proton transport; Biological Process	4	2	4	3	3	3	8	4	4	6	1	0	1	2	5	2	BACU005517_WHALE,ENSMUST00000097132_MOUSE,ENSRNOT00000046250_RATTU,ENST00000524422_HUMAN,Deer_GLEAN_10019729_DAVID,PHO00016651_CHIRU,Muntiacus_muntjak_ATP5L_10021773_MUNTJ,ENSRNOT00000030064_RATTU,GOAT_ENSBTAP00000048915_GOATS,PHO00001013_CHIRU,Deer_GLEAN_10003686_DAVID,Deer_GLEAN_10014127_DAVID,BACU017319_WHALE,Oryx_gazella_ATP5L_10015699_GAZEL,ENSMUST00000043675_MOUSE,PHO00000622_CHIRU,ENSBTAT0…
FAM136A	NA	2	1	3	4	3	3	5	5	2	7	1	2	1	1	1	3	Muntiacus_muntjak_FAM136A_10007426_MUNTJ,ENSBTAP00000049224-D1_GRUNN,Oryx_gazella_FAM136A_10018669_GAZEL,Deer_GLEAN_10006950_DAVID,Muntiacus_muntjak_FAM136A_10008908_MUNTJ,KB016946.1_cdsid_EPY82170.1_CAMEL,Giraffe_FAM136A_10000234_GIRAF,PHO00021223_CHIRU,BACU018455_WHALE,goat_GLEAN_10012026_GOATS,BACU006035_WHALE,ENSBTAT00000043105_BOVIN,Deer_GLEAN_10012072_DAVID,Deer_GLEAN_10014966_DAVID,ENSSSCP…
PRR23B,PRR23A,PRR23C	NA	6	3	5	6	6	4	5	4	4	4	1	1	0	3	1	4	GOAT_ENSP00000372649-D2_GOATS,Oryx_gazella_PRR23A_10009324_GAZEL,GOAT_ENSP00000372649-D4_GOATS,SHEEP_ENSP00000396648_SHEEP,GOAT_ENSP00000372649_GOATS,BACU014037_WHALE,PHO00001723_CHIRU,goat_GLEAN_10011156_GOATS,Deer_GLEAN_10009446_DAVID,ENSP00000328768-D5_GRUNN,sheep_GLEAN_10001481_SHEEP,ENSRNOT00000034801_RATTU,Giraffe_PRR23B_10017388_GIRAF,PHO00002864_CHIRU,Oryx_gazella_PRR23A_10002856_GAZEL,EN…
UQCRB	GO:0006122; mitochondrial electron transport, ubiquinol to cytochrome c; Biological Process.GO:0008121; ubiquinol-cytochrome-c reductase activity; Molecular Function	2	2	2	1	3	1	4	1	1	3	0	0	1	1	2	1	Muntiacus_muntjak_UQCRB_10000313_MUNTJ,Giraffe_UQCRB_10011789_GIRAF,ENST00000287022_HUMAN,BACU019297_WHALE,ENSBTAP00000001993-D1_GRUNN,ENSBTAP00000008748-D1_GRUNN,Deer_GLEAN_10011073_DAVID,yakG045199_GRUNN,Deer_GLEAN_10023505_DAVID,Deer_GLEAN_10013593_DAVID,ENSMUST00000021993_MOUSE,GOAT_ENSBTAP00000008748_GOATS,ENSRNOT00000046035_RATTU,ENSBTAT00000001993_BOVIN,SHEEP_ENSBTAP00000008748_SHEEP,PHO00…

[truncated: 4 more sheets: SuinaCetaRum_contractions, SuinaCetaRum_expansions, Cetartiodactyla_contractions, Cetartiodactyla_expansions]
