# Supplementary material for: Evolution of gene regulation in ruminants differs between evolutionary breakpoint regions and homologous synteny blocks
Source: HighWire-hosted journal article supplement (doi:10.1101/gr.239863.118), 2019-02-13
Supplement: Supplemental_Table_S8.xlsx [file Supplemental_Table_S8.xlsx]

## Sheet: EBRs
Supplemental Table 8. Enrichments results of the association of transposable elements with three types of evolutionary breakpoint regions (EBRs).
RUMINANT EBRs
Inside EBR								Extending EBR 50 Kbp
annotation	fold	l2fold	pvalue	FDR	Origin of TE*			annotation	fold	l2fold	pvalue	FDR	Origin of TE*
tRNA-Glu-GAG	41.5755	5.3777	0.0002	0.0059568	Ruminants			BtERVF2_I-int	14.1359	3.8213	0.0002	0.0062971	Ruminants
BtERVF2_I-int	33.9006	5.0832	0.0002	0.0059568	Ruminants			LTR39C2_BT	6.8549	2.7771	0.0002	0.0062971	Ruminants
LTR39C2_BT	20.3363	4.346	0.0002	0.0059568	Ruminants			MER67A	5.9229	2.5663	0.0002	0.0062971	Mammals
MER76	15.6608	3.9691	0.0002	0.0059568	Mammals			LTR5_BT	5.3486	2.4192	0.0002	0.0062971	Ruminants
BtERVF1_LTR	14.2902	3.837	0.0002	0.0059568	Ruminants			LTR10A_BT	4.0383	2.0138	0.0002	0.0062971	Ruminants
L1M3c	11.0556	3.4667	0.0002	0.0059568	Mammals			MER87B_BT	3.5429	1.8249	0.0002	0.0062971	Ruminants
MER87B_BT	6.3627	2.6696	0.0002	0.0059568	Ruminants			ALTR2B1_BT	2.8526	1.5123	0.0002	0.0062971	Ruminants
L1-2_BT	5.7644	2.5272	0.0002	0.0059568	Ruminants			ERV1-1-LTR_BT	2.8251	1.4983	0.0002	0.0062971	Ruminants
ERV1-1-LTR_BT	3.9557	1.9839	0.0002	0.0059568	Ruminants			BTLTR1B1	2.7221	1.4447	0.0002	0.0062971	Ruminants
LTR1_BT	3.8152	1.9318	0.0002	0.0059568	Ruminants			L1-2_BT	2.5415	1.3457	0.0002	0.0062971	Ruminants
L1M3	3.7519	1.9076	0.0002	0.0059568	Mammals			ALTR2C_BT	2.2501	1.17	0.0002	0.0062971	Mammals
BTLTR1	2.7933	1.4819	0.0002	0.0059568	Ruminants			BTLTR1	1.6387	0.7126	0.0002	0.0062971	Ruminants
L1_BT	2.2324	1.1586	0.0002	0.0059568	Ruminants			BovB	1.2136	0.2793	0.0002	0.0062971	Ruminants
L1_Art	1.8082	0.8545	0.0002	0.0059568	Ruminants			ART2A	1.1242	0.1689	0.0002	0.0062971	Ruminants
BovB	1.5938	0.6725	0.0002	0.0059568	Ruminants			MIR	0.7466	-0.4216	0.0002	0.0062971	Mammals
ART2A	1.302	0.3807	0.0002	0.0059568	Ruminants			MIRb	0.7105	-0.4931	0.0002	0.0062971	Mammals
MER5A	0.3727	-1.4239	0.0002	0.0059568	Mammals			MIRc	0.6636	-0.5915	0.0002	0.0062971	Mammals
MIRb	0.3523	-1.5052	0.0002	0.0059568	Mammals			L2c	0.6531	-0.6146	0.0002	0.0062971	Mammals
L2	0.3199	-1.6442	0.0002	0.0059568	Mammals			L3	0.6339	-0.6576	0.0002	0.0062971	Mammals
MIR	0.2932	-1.7701	0.0002	0.0059568	Mammals			L2a	0.6186	-0.6929	0.0002	0.0062971	Mammals
L2c	0.2876	-1.7981	0.0002	0.0059568	Mammals			L1ME1	0.4245	-1.2363	0.0002	0.0062971	Mammals
L2a	0.2331	-2.1007	0.0002	0.0059568	Mammals			MER58B	0.2883	-1.7941	0.0002	0.0062971	Mammals
L2b	0.2251	-2.1511	0.0002	0.0059568	Mammals			MLT2B4	0.1624	-2.6224	0.0002	0.0062971	Mammals
MER5B	0.2005	-2.3182	0.0002	0.0059568	Mammals
MIRc	0.1902	-2.3944	0.0002	0.0059568	Mammals
MIR3	0.1392	-2.8449	0.0002	0.0059568	Mammals
L1MC4	0.0677	-3.8852	0.0002	0.0059568	Mammals
L1ME1	0.0156	-6.0018	0.0002	0.0059568	Mammals
HAL1	0.0003	-11.6431	0.0002	0.0059568	Mammals
PECORAN EBRs
Inside EBR								Extending EBR 50 Kbp
annotation	fold	l2fold	pvalue	FDR	Origin of TE*			annotation	fold	l2fold	pvalue	FDR	Origin of TE*
ERV2-1C-LTR_BT	105.749	6.7245	0.0002	0.008163	Ruminants			MER50-int	33.7598	5.0772	0.0002	0.016954	Mammals
ERV2-3-I_BT-int	75.2716	6.234	0.0002	0.008163	Ruminants			tRNA-Glu-GAG	20.2559	4.3403	0.0002	0.016954	Ruminants
MER57-int	64.9828	6.022	0.0002	0.008163	Mammals			MER57-int	15.0251	3.9093	0.0002	0.016954	Mammals
L1MA5	33.8249	5.08	0.0002	0.008163	Mammals			LTR39C2_BT	14.8185	3.8893	0.0002	0.016954	Ruminants
LTR39C2_BT	32.217	5.0097	0.0002	0.008163	Ruminants			MER44B	14.8151	3.889	0.0002	0.016954	Mammals
BtERVF1_LTR	28.6279	4.8394	0.0002	0.008163	Ruminants			MER67A	14.7019	3.8779	0.0002	0.016954	Mammals
MER66-int	21.483	4.4251	0.0002	0.008163	Mammals			ALTR39_BT	5.4396	2.4435	0.0002	0.016954	Ruminants
ALTR39_BT	15.5663	3.9604	0.0002	0.008163	Ruminants			MLT1F1	3.7366	1.9017	0.0002	0.016954	Mammals
L1MCa	10.0238	3.3254	0.0002	0.008163	Mammals			L1-2_BT	2.2719	1.1839	0.0002	0.016954	Ruminants
LTR39B_BT	7.1089	2.8296	0.0002	0.008163	Ruminants			L1_Art	1.5079	0.5925	0.0002	0.016954	Ruminants
L1M3	6.1643	2.6239	0.0002	0.008163	Mammals
ERV1-2-LTR_BT	5.7344	2.5196	0.0002	0.008163	Ruminants
L1-2_BT	5.3422	2.4174	0.0002	0.008163	Ruminants
CHR-2A	2.6131	1.3858	0.0002	0.008163	Cetartiodactyls
CHRL1_BT	2.5075	1.3262	0.0002	0.008163	Cetartiodactyls
L1_Art	2.2517	1.171	0.0002	0.008163	Cetartiodactyls
MIRb	0.3138	-1.672	0.0002	0.008163	Mammals
MIRc	0.2186	-2.1935	0.0002	0.008163	Mammals
L2a	0.1762	-2.5046	0.0002	0.008163	Mammals
L2b	0.1738	-2.5248	0.0002	0.008163	Mammals
MIR	0.0705	-3.8271	0.0002	0.008163	Mammals
MIR3	0.0394	-4.6669	0.0002	0.008163	Mammals
