# Supplementary material for: Evolution of gene regulation in ruminants differs between evolutionary breakpoint regions and homologous synteny blocks
Source: HighWire-hosted journal article supplement (doi:10.1101/gr.239863.118), 2019-02-13
Supplement: Supplemental_Table_S9.xlsx [file Supplemental_Table_S9.xlsx]

## Sheet: CNEs_TEs
Supplemental Table 9. Association of conserved non-coding elements (CNEs) with transposable elements (TEs).
Mammalian CNEs									Cetartiodactyl CNEs									Ruminant CNEs
TE	Fold enrichment	Log2 Fold	P-value	FDR	Percentage of TEs under selective constraint	Origin of TE			TE	Fold enrichment	Log2 Fold	P-value	FDR	Percentage of TEs under selective constraint	Origin of TE			TE	Fold enrichment	Log2 Fold	P-value	FDR	Percentage of TEs under selective constraint	Origin of TE
Eulor10	51.838	5.6959	0.0002	0.00046695	40.625	Mammal			UCON9	16.4729	4.042	0.0002	0.0005893	19.5652	Mammal			tRNA-Glu-CAA_	33.1325	5.0502	0.001	0.0027143	5.5556	Ruminant
tRNA-Pro-CCA	45.7733	5.5164	0.0002	0.00046695	38.8889	Mammal			tRNA-Ala-GCG	14.5383	3.8618	0.0118	0.030753	10.5263	Unknown			LTR23-int	24.3207	4.6041	0.001	0.0027143	9.3023	Unknown
Eulor4	42.6681	5.4151	0.0002	0.00046695	40.9091	Mammal			UCON1	13.6544	3.7713	0.0002	0.0005893	8	Mammal			tRNA-Glu-CGG	20.8824	4.3842	0.001	0.0027143	9.0909	Ruminant
UCON7	41.5716	5.3775	0.0002	0.00046695	47.5728	Mammal			HAL1N1_MD	12.2246	3.6117	0.0118	0.030753	11.1111	Mammal			LTR45	17.5835	4.1362	0.001	0.0027143	8.3333	Unknown
UCON15	39.7029	5.3112	0.0002	0.00046695	46.1538	Mammal			Eulor4	10.8828	3.444	0.0002	0.0005893	9.0909	Mammal			tRNA-Leu-TTA(m)	9.4458	3.2397	0.001	0.0027143	4.7619	Ruminant
Eulor5B	39.6809	5.3104	0.0002	0.00046695	56.4103	Mammal			Eulor6C	9.0321	3.1751	0.0118	0.030753	10.5263	Mammal			MER66C	8.3957	3.0697	0.001	0.0027143	5.5556	Unknown
MER123	38.5014	5.2668	0.0002	0.00046695	47.619	Mammal			UCON25	8.4777	3.0837	0.0118	0.030753	7.4074	Mammal			HERVL32-int	6.9878	2.8048	0.001	0.0027143	5	Unknown
tRNA-Arg-CGA	37.8999	5.2441	0.0002	0.00046695	50	Mammal			MER123	7.6547	2.9363	0.0002	0.0005893	4.7619	Mammal			MER50-int	6.1682	2.6249	0.001	0.0027143	4.7619	Unknown
UCON20	34.4145	5.1049	0.0002	0.00046695	35	Mammal			Eulor1	7.614	2.9286	0.0002	0.0005893	6.0606	Mammal			Ricksha_c	4.5027	2.1708	0.001	0.0027143	2.7586	Unknown
Eulor3	34.3203	5.101	0.0002	0.00046695	36.3636	Mammal			Eulor11	7.374	2.8825	0.0118	0.030753	8.2192	Mammal			LTR48B	4.4307	2.1475	0.001	0.0027143	6.5574	Unknown
tRNA-Pro-CCY	34.3127	5.1007	0.0002	0.00046695	41.6667	Mammal			X9_LINE	7.2684	2.8616	0.0118	0.030753	5.4545	Unknown			MER44B	4.2339	2.082	0.001	0.0027143	4.0293	Ruminant
tRNA-Ser-TCG	33.9949	5.0872	0.0002	0.00046695	40	Mammal			UCON24	6.9774	2.8027	0.0118	0.030753	8.6957	Mammal			MLT1H1-int	4.1609	2.0569	0.001	0.0027143	8.7558	Unknown
Eulor8	33.5005	5.0661	0.0002	0.00046695	48.5981	Mammal			UCON18	6.7427	2.7533	0.0002	0.0005893	10	Mammal			MamRep488	3.9508	1.9821	0.001	0.0027143	3.8168	Mammal
UCON14	32.8536	5.038	0.0002	0.00046695	45.5556	Mammal			Eulor9C	6.354	2.6677	0.0002	0.0005893	5.8824	Mammal			LTR31B_BT	3.9363	1.9768	0.001	0.0027143	6.136	Ruminant
UCON25	32.2245	5.0101	0.0002	0.00046695	48.1481	Mammal			UCON8	6.2752	2.6497	0.0002	0.0005893	5.8824	Mammal			LTR86C	3.6064	1.8506	0.001	0.0027143	3.4091	Unknown
MER136	32.0453	5.002	0.0002	0.00046695	41.6667	Mammal			MER135	6.0469	2.5962	0.0002	0.0005893	4.9407	Mammal			MER97d	3.5999	1.848	0.001	0.0027143	5.9701	Unknown
MER125	31.1882	4.9629	0.0002	0.00046695	35.5372	Mammal			Eulor2A	5.9534	2.5737	0.0118	0.030753	5.7692	Mammal			MER4B-int	3.59	1.844	0.001	0.0027143	4	Unknown
UCON10	30.8891	4.949	0.0002	0.00046695	41.8182	Mammal			X7C_LINE	5.8011	2.5363	0.0002	0.0005893	5.3269	Unknown			MER34B-int	3.5831	1.8412	0.001	0.0027143	5.0265	Unknown
UCON17	30.4197	4.9269	0.0002	0.00046695	42.3077	Mammal			Eulor9A	5.7983	2.5356	0.0002	0.0005893	4.3011	Mammal			LTR73_BT	3.5359	1.8221	0.001	0.0027143	4.2169	Ruminant
Eulor1	30.3254	4.9225	0.0002	0.00046695	37.8788	Mammal			ALINE	5.706	2.5125	0.0002	0.0005893	8.5	Unknown			LTR75	3.4089	1.7693	0.001	0.0027143	6.8182	Ruminant
tRNA-Thr-ACY_	28.9902	4.8575	0.0002	0.00046695	29.4118	Unknown			X2_LINE	5.6437	2.4966	0.0038	0.011167	6.6667	Unknown			MLT1J2-int	3.2599	1.7048	0.001	0.0027143	6.2678	Unknown
UCON28b	28.6894	4.8424	0.0002	0.00046695	28.5714	Mammal			AmnSINE2	5.4387	2.4433	0.0002	0.0005893	5.7348	Unknown			LTR86B1	3.2513	1.701	0.001	0.0027143	4.955	Unknown
Eulor6A	28.5867	4.8373	0.0002	0.00046695	38.4615	Mammal			MamRep434	5.41	2.4356	0.0002	0.0005893	7.9186	Mammal			LTR13_BT	3.2151	1.6849	0.001	0.0027143	3.7075	Ruminant
MER131	28.5504	4.8354	0.0002	0.00046695	33.2326	Mammal			UCON26	5.3593	2.422	0.0002	0.0005893	5.7325	Mammal			MER31A	3.1957	1.6761	0.001	0.0027143	4.7377	Unknown
tRNA-SeC(e)-TGA	28.0645	4.8107	0.012	0.025285	50	Unknown			MER121	5.3474	2.4188	0.0002	0.0005893	7.4442	Mammal			MER31-int	3.1423	1.6518	0.001	0.0027143	5.7776	Unknown
UCON22	27.7031	4.792	0.0002	0.00046695	30.7692	Mammal			MER132	5.3245	2.4126	0.0118	0.030753	2.7027	Mammal			ERV3-16A3_LTR	3.1418	1.6516	0.001	0.0027143	4.2353	Unknown
UCON11	27.6583	4.7896	0.0002	0.00046695	32.6087	Mammal			UCON28a	5.324	2.4125	0.0002	0.0005893	5.3571	Mammal			MLT1L-int	3.1143	1.6389	0.001	0.0027143	6.6667	Unknown
UCON13	27.3128	4.7715	0.0002	0.00046695	36	Mammal			MER129	5.0746	2.3433	0.0002	0.0005893	6.0606	Mammal			MamRep1879	3.104	1.6341	0.001	0.0027143	3.0952	Mammal
UCON19	26.9721	4.7534	0.0002	0.00046695	40.7407	Mammal			LTR90A	5.0174	2.3269	0.0002	0.0005893	7.393	Unknown			MER21-int	3.0855	1.6255	0.001	0.0027143	5.317	Unknown
MER133A	26.8093	4.7447	0.0002	0.00046695	35.1351	Mammal			X6A_LINE	4.7389	2.2445	0.0002	0.0005893	5.7692	Unknown			MER44D	3.0672	1.6169	0.001	0.0027143	4.5603	Unknown
Eulor12	26.592	4.7329	0.0002	0.00046695	36.1702	Mammal			X6B_LINE	4.5497	2.1858	0.0002	0.0005893	4.5946	Unknown			LTR88b	3.0158	1.5926	0.001	0.0027143	2.8953	Unknown
tRNA-Trp-TGG	26.3412	4.7192	0.0002	0.00046695	29.1667	Unknown			X5A_LINE	4.4772	2.1626	0.0002	0.0005893	3.6364	Unknown			Helitron2Na_Mam	3.0098	1.5897	0.001	0.0027143	2.1739	Mammal
tRNA-Ser-TCY	26.1393	4.7081	0.0002	0.00046695	33.3333	Unknown			MamGypLTR2c	4.4678	2.1596	0.0002	0.0005893	6.136	Mammal			MER67B	2.9962	1.5831	0.001	0.0027143	4.6575	Unknown
tRNA-Ala-GCG	25.5956	4.6778	0.0002	0.00046695	26.3158	Unknown			Plat_L3	4.3746	2.1291	0.0002	0.0005893	6.1381	Unknown			LTR16E1	2.9644	1.5677	0.001	0.0027143	3.6571	Unknown
tRNA-Gln-CAA	25.3959	4.6665	0.0002	0.00046695	23.0769	Unknown			LFSINE_Vert	4.2783	2.097	0.0002	0.0005893	4.2938	Unknown			X3_LINE	2.9274	1.5496	0.001	0.0027143	1.9231	Mammal
Eulor6C	24.9143	4.6389	0.0002	0.00046695	26.3158	Mammal			MER126	4.2576	2.09	0.0002	0.0005893	4.0936	Mammal			LTR72_BT	2.926	1.5489	0.001	0.0027143	3.9543	Ruminant
tRNA-Cys-TGY	24.6901	4.6259	0.0002	0.00046695	20.2703	Unknown			AmnSINE1	4.1844	2.065	0.0002	0.0005893	4.1206	Mammal			MER66-int	2.9108	1.5414	0.001	0.0027143	3.4398	Unknown
tRNA-His-CAY_	24.4167	4.6098	0.0002	0.00046695	26.1905	Unknown			Mam_R4	4.1045	2.0372	0.0002	0.0005893	7.6372	Unknown			MER57LA	2.9084	1.5402	0.001	0.0027143	3.7391	Unknown
MER121	24.3437	4.6055	0.0002	0.00046695	32.2581	Mammal			Tigger16a	4.0036	2.0013	0.0002	0.0005893	4.4723	Unknown			MER110A	2.8916	1.5319	0.001	0.0027143	3.5928	Unknown
Eulor2C	24.0734	4.5894	0.0002	0.00046695	25.7143	Mammal			MER124	3.9301	1.9746	0.0002	0.0005893	4.5541	Mammal			MLT1A-int	2.8774	1.5248	0.001	0.0027143	6.2706	Unknown
UCON31	23.7142	4.5677	0.0002	0.00046695	30	Mammal			L5	3.8714	1.9528	0.0002	0.0005893	6.7568	Unknown			LTR52-int	2.8754	1.5237	0.001	0.0027143	5.4945	Unknown
tRNA-Thr-ACG	23.5849	4.5598	0.0002	0.00046695	33.3333	Unknown			MamGypLTR1d	3.8095	1.9296	0.0002	0.0005893	7.483	Mammal			MER87_BT	2.8554	1.5137	0.001	0.0027143	4	Ruminant
UCON27	23.498	4.5545	0.0002	0.00046695	37.9747	Mammal			MARNA	3.7436	1.9044	0.0002	0.0005893	5.5195	Unknown			LTR6B_BT	2.8138	1.4925	0.001	0.0027143	3.1073	Ruminant
UCON1	23.4643	4.5524	0.0002	0.00046695	32	Mammal			Helitron2Na_Mam	3.7412	1.9035	0.0002	0.0005893	4.7101	Mammal			LTR16A2	2.8084	1.4897	0.001	0.0027143	3.5286	Unknown
tRNA-Leu-CTA	23.3074	4.5427	0.012	0.025285	50	Unknown			Charlie13b	3.679	1.8793	0.0002	0.0005893	3.7543	Unknown			LTR85b	2.7985	1.4847	0.001	0.0027143	3.2349	Unknown
UCON26	22.6759	4.5031	0.0002	0.00046695	34.3949	Mammal			ORSL-2a	3.6743	1.8775	0.0002	0.0005893	6.4151	Unknown			UCON28a	2.7884	1.4794	0.001	0.0027143	0.8929	Mammal
UCON24	22.675	4.503	0.0002	0.00046695	34.7826	Mammal			MamSINE1	3.6293	1.8597	0.0002	0.0005893	5.0883	Mammal			LTR40a	2.7872	1.4788	0.001	0.0027143	4.4136	Ruminant
Eulor7	22.0278	4.4613	0.0002	0.00046695	27.2727	Mammal			L3b	3.6291	1.8596	0.0002	0.0005893	4.3183	Unknown			Kanga1d	2.7705	1.4701	0.001	0.0027143	2.2495	Unknown
tRNA-Thr-ACA	21.8836	4.4518	0.0002	0.00046695	23.0769	Mammal			CR1_Mam	3.5757	1.8382	0.0002	0.0005893	6.1538	Mammal			LTR16E2	2.7648	1.4672	0.001	0.0027143	4.3109	Unknown
UCON21	21.7953	4.4459	0.0002	0.00046695	30.7692	Mammal			Tigger16b	3.4881	1.8024	0.0002	0.0005893	4.0764	Unknown			MER92B	2.7451	1.4569	0.001	0.0027143	4.3956	Unknown
MER134	21.5655	4.4307	0.0002	0.00046695	24.0741	Mammal			LTR81B	3.4651	1.7929	0.0002	0.0005893	5.5714	Unknown			tRNA-Glu-GAG_	2.7039	1.435	0.001	0.0027143	1.3966	Ruminant
tRNA-Ser-TCA_	20.9178	4.3867	0.0002	0.00046695	25	Mammal			LTR81A	3.4235	1.7755	0.0002	0.0005893	4.8387	Unknown			MLT1H-int	2.6941	1.4298	0.001	0.0027143	4.7096	Unknown
UCON18	20.7346	4.374	0.0002	0.00046695	40	Mammal			MER94B	3.4124	1.7708	0.0002	0.0005893	3.4483	Mammal			MER110	2.6928	1.4291	0.001	0.0027143	3.8674	Unknown
Eulor6B	19.7375	4.3029	0.0002	0.00046695	23.2143	Mammal			Charlie22a	3.4013	1.7661	0.0002	0.0005893	4.4604	Unknown			LTR16B	2.6739	1.419	0.001	0.0027143	3.7702	Unknown
Eulor9C	19.5382	4.2882	0.0002	0.00046695	25.4902	Mammal			X8_LINE	3.3218	1.732	0.0002	0.0005893	4.8889	Unknown			Arthur1B	2.6692	1.4164	0.001	0.0027143	3.8824	Unknown
UCON9	19.0869	4.2545	0.0002	0.00046695	19.5652	Mammal			LTR90B	3.2401	1.6961	0.0002	0.0005893	4.2296	Unknown			MER57-int	2.6583	1.4105	0.001	0.0027143	4.01	Unknown
Eulor2A	18.9794	4.2464	0.0002	0.00046695	32.6923	Mammal			DNA1_Mam	3.2091	1.6822	0.0118	0.030753	4.9587	Mammal			LTR52	2.6123	1.3853	0.001	0.0027143	3.5443	Unknown
tRNA-Ser-AGY	18.891	4.2396	0.0002	0.00046695	26.4706	Mammal			MamGypLTR1c	3.1879	1.6726	0.0002	0.0005893	5.3601	Mammal			ERV54-EC_LTR	2.6039	1.3807	0.001	0.0027143	3.4273	Unknown
UCON16	18.8791	4.2387	0.0002	0.00046695	28.125	Mammal			LTR86A2	3.1643	1.6619	0.0002	0.0005893	6.2762	Unknown			MamGypLTR1c	2.5704	1.362	0.001	0.0027143	3.3501	Mammal
tRNA-Arg-CGY_	18.8685	4.2379	0.0002	0.00046695	22.2222	Mammal			MamRep605	3.1445	1.6528	0.0002	0.0005893	5.1422	Mammal			MLT2C2	2.5701	1.3618	0.001	0.0027143	3.3461	Unknown
MER129	18.8281	4.2348	0.0002	0.00046695	25.2525	Mammal			X3_LINE	3.0447	1.6063	0.0002	0.0005893	4.7009	Unknown			MER67A	2.5685	1.3609	0.001	0.0027143	3.9437	Unknown
Eulor5A	18.5796	4.2156	0.0002	0.00046695	28.7129	Mammal			Charlie26a	3.0128	1.5911	0.0002	0.0005893	4.8295	Unknown			MamGypLTR2c	2.5474	1.349	0.001	0.0027143	2.3217	Mammal
Eulor9A	18.5429	4.2128	0.0002	0.00046695	21.5054	Mammal			Tigger15a	3.0007	1.5853	0.0002	0.0005893	4.9394	Unknown			MLT1B-int	2.5452	1.3478	0.001	0.0027143	5.2786	Unknown
Eulor2B	18.3365	4.1966	0.0002	0.00046695	18.9655	Mammal			Charlie13a	2.9502	1.5608	0.0002	0.0005893	6.9544	Unknown			ALTR2B_BT	2.5379	1.3437	0.001	0.0027143	4.0121	Ruminant
UCON8	17.9617	4.1669	0.0002	0.00046695	20	Mammal			MamGyp-int	2.8156	1.4934	0.0002	0.0005893	6.1798	Mammal			MLT1G3-int	2.5366	1.3429	0.001	0.0027143	4.5977	Unknown
Eulor6D	17.9132	4.1629	0.0002	0.00046695	25.4237	Mammal			Kanga11a	2.802	1.4865	0.0002	0.0005893	5.2877	Unknown			LTR33A_	2.5135	1.3297	0.001	0.0027143	3.8797	Unknown
X2_LINE	17.8539	4.1582	0.0002	0.00046695	26.6667	Mammal			Tigger14a	2.802	1.4865	0.0002	0.0005893	4.6117	Unknown			MLT2C1	2.4642	1.3011	0.001	0.0027143	3.2752	Unknown
tRNA-Met-i	17.8218	4.1556	0.0002	0.00046695	23.2558	Mammal			Charlie19a	2.7581	1.4637	0.0002	0.0005893	3.5959	Unknown			MER94B	2.4609	1.2992	0.001	0.0027143	1.3263	Mammal
UCON23	17.6535	4.1419	0.0002	0.00046695	23.3333	Mammal			LTR88b	2.7317	1.4498	0.0002	0.0005893	4.6771	Unknown			MER31B	2.4577	1.2973	0.001	0.0027143	3.4813	Unknown
Eulor6E	17.5363	4.1323	0.0002	0.00046695	28	Mammal			LTR88c	2.7316	1.4497	0.0002	0.0005893	5.0186	Unknown			MER34-int	2.4523	1.2941	0.001	0.0027143	3.2984	Unknown
MER130	17.0922	4.0953	0.0002	0.00046695	31.5789	Mammal			7SK	2.71	1.4383	0.0002	0.0005893	2.957	Unknown			ERV1-3-I_BT-int	2.4294	1.2806	0.001	0.0027143	4.3243	Ruminant
tRNA-Ile-ATT	17.0614	4.0927	0.0002	0.00046695	18.6667	Mammal			LTR85a	2.6972	1.4315	0.0002	0.0005893	4.2591	Unknown			Helitron1Nb_Mam	2.4255	1.2783	0.001	0.0027143	3.1579	Mammal
Eulor11	16.5967	4.0528	0.0002	0.00046695	27.3973	Mammal			LTR85b	2.6755	1.4198	0.0002	0.0005893	4.782	Unknown			LTR39B_BT	2.425	1.278	0.001	0.0027143	4.4662	Ruminant
tRNA-Leu-TTA	16.1838	4.0165	0.0002	0.00046695	22.2222	Mammal			MER103C	2.664	1.4136	0.0002	0.0005893	4.0073	Mammal			MER110-int	2.4151	1.2721	0.001	0.0027143	3.7313	Unknown
tRNA-Ala-GCY	15.9813	3.9983	0.0002	0.00046695	23.8095	Mammal			Charlie18a	2.6554	1.4089	0.0002	0.0005893	4.0096	Unknown			LTR81B	2.4107	1.2695	0.001	0.0027143	2.1429	Mammal
UCON2	15.7932	3.9812	0.0002	0.00046695	20.1923	Mammal			MamRep488	2.6491	1.4055	0.0002	0.0005893	3.0534	Mammal			MamRep38	2.385	1.254	0.001	0.0027143	2.7439	Mammal
MER133B	15.6037	3.9638	0.0002	0.00046695	25.9259	Mammal			Tigger12	2.6398	1.4004	0.0002	0.0005893	5.1205	Unknown			LTR75_BT	2.3836	1.2531	0.001	0.0027143	3.8028	Ruminant
X5A_LINE	15.4936	3.9536	0.0002	0.00046695	16.3636	Mammal			LTR89	2.6391	1.4	0.0002	0.0005893	3.6697	Unknown			Arthur1	2.3786	1.2501	0.001	0.0027143	3.6046	Unknown
UCON28a	15.3717	3.9422	0.0002	0.00046695	21.4286	Mammal			Charlie20a	2.613	1.3857	0.0002	0.0005893	4.1051	Unknown			MLT2B1	2.3608	1.2393	0.001	0.0027143	4.2448	Unknown
tRNA-Pro-CCG	15.32	3.9373	0.0002	0.00046695	20	Mammal			MER117	2.5814	1.3682	0.0002	0.0005893	3.1056	Mammal			MLT1E1	2.355	1.2357	0.001	0.0027143	3.7461	Unknown
X6A_LINE	15.0964	3.9161	0.0002	0.00046695	17.3077	Mammal			Tigger8	2.5771	1.3657	0.0002	0.0005893	4.3344	Unknown			BtERV3B_LTR	2.3394	1.2262	0.001	0.0027143	3.7934	Ruminant
(CGAG)n	15.043	3.911	0.0002	0.00046695	11.4286	Mammal			Charlie16a	2.5696	1.3615	0.0002	0.0005893	3.2399	Unknown			MamRep4096	2.3206	1.2145	0.001	0.0027143	3.1401	Mammal
Eulor9B	14.8379	3.8912	0.0002	0.00046695	20.8333	Mammal			LTR68	2.5452	1.3478	0.0118	0.030753	4.6429	Unknown			LTR40A1	2.2988	1.2009	0.001	0.0027143	3.2787	Unknown
UCON5	14.7031	3.878	0.0002	0.00046695	14.6893	Mammal			MLT1J1-int	2.5197	1.3333	0.0002	0.0005893	6.4516	Unknown			LTR68	2.2971	1.1998	0.001	0.0027143	3.9286	Unknown
tRNA-Leu-CTY	14.253	3.8332	0.0002	0.00046695	15.625	Mammal			MER99	2.462	1.2998	0.0002	0.0005893	4.3321	Mammal			Zaphod3	2.2861	1.1929	0.001	0.0027143	2.9576	Unknown
MER126	14.2439	3.8323	0.0002	0.00046695	16.3743	Mammal			MLT1M	2.4389	1.2862	0.0002	0.0005893	3.6285	Unknown			ALTR39_BT	2.2758	1.1864	0.001	0.0027143	4.0851	Ruminant
UCON12	14.1631	3.8241	0.0002	0.00046695	19.3548	Mammal			L1M6	2.43	1.281	0.0002	0.0005893	5.7165	Unknown			MER96	2.2689	1.182	0.001	0.0027143	2.583	Unknown
tRNA-Leu-CTA_	14.1349	3.8212	0.012	0.025285	14.2857	Mammal			L4	2.407	1.2672	0.0002	0.0005893	4.2193	Unknown			LTR39C_BT	2.264	1.1789	0.001	0.0027143	3.2939	Ruminant
tRNA-Lys-AAA	13.9363	3.8008	0.0002	0.00046695	13.9241	Mammal			Charlie15a	2.3836	1.2531	0.0002	0.0005893	3.0189	Unknown			HERVL74-int	2.2635	1.1785	0.001	0.0027143	4.9462	Unknown
tRNA-Ala-GCY_	13.5193	3.7569	0.0002	0.00046695	13.3333	Mammal			MamRep1161	2.3706	1.2452	0.0002	0.0005893	4.122	Mammal			MER53	2.2459	1.1673	0.001	0.0027143	2.0846	Unknown
X1_LINE	13.469	3.7516	0.0002	0.00046695	22.2222	Mammal			X7A_LINE	2.3673	1.2432	0.0002	0.0005893	3.2103	Unknown			LTR89	2.2382	1.1623	0.001	0.0027143	1.9878	Unknown
UCON29	12.9582	3.6958	0.0002	0.00046695	24.1206	Mammal			LTR86B2	2.3187	1.2133	0.0002	0.0005893	4.4199	Unknown			MER94	2.2165	1.1483	0.001	0.0027143	2.0574	Unknown
UCON28c	12.9493	3.6948	0.0002	0.00046695	20.4082	Mammal			LTR85c	2.3149	1.2109	0.0002	0.0005893	3.6603	Unknown			LTR88a	2.2127	1.1458	0.001	0.0027143	2.1186	Unknown
MER127	12.8352	3.682	0.0002	0.00046695	20	Mammal			Tigger12A	2.3066	1.2057	0.0002	0.0005893	2.9703	Unknown			MER67C	2.2058	1.1413	0.001	0.0027143	3.3439	Unknown
MER135	12.4493	3.638	0.0002	0.00046695	15.2174	Mammal			LTR83	2.2929	1.1972	0.0002	0.0005893	3.5448	Unknown			LTR16C	2.1984	1.1364	0.001	0.0027143	3.431	Unknown
LFSINE_Vert	11.9942	3.5843	0.0002	0.00046695	16.1924	Mammal			Helitron1Na_Mam	2.2159	1.1479	0.0158	0.040305	3.5398	Mammal			MLT2D	2.1911	1.1317	0.001	0.0027143	3.1433	Unknown
UCON6	11.7125	3.55	0.0002	0.00046695	19.0476	Mammal			L3	2.2142	1.1468	0.0002	0.0005893	3.5402	Unknown			L1M3b	2.1776	1.1228	0.001	0.0027143	4.9881	Unknown
tRNA-Arg-AGG	11.2805	3.4958	0.0002	0.00046695	12.5	Mammal			MLT1N2	2.2013	1.1384	0.0002	0.0005893	3.5307	Unknown			LTR85c	2.17	1.1177	0.001	0.0027143	2.6354	Unknown
tRNA-Lys-AAG	11.1946	3.4847	0.0002	0.00046695	12.037	Mammal			MIR3	2.1903	1.1311	0.0002	0.0005893	2.7002	Mammal			LTR78	2.1626	1.1128	0.001	0.0027143	3.2013	Ruminant
X8_LINE	10.7926	3.432	0.0002	0.00046695	16.4444	Mammal			Charlie23a	2.1749	1.1209	0.0002	0.0005893	2.9703	Unknown			MER34	2.154	1.107	0.001	0.0027143	3.457	Unknown
AmnSINE2	10.779	3.4301	0.0002	0.00046695	12.1864	Mammal			MamGypLTR3	2.1577	1.1095	0.0002	0.0005893	4.1502	Mammal			MLT1H2	2.138	1.0963	0.001	0.0027143	2.6972	Unknown
MER132	10.6777	3.4165	0.0002	0.00046695	16.2162	Mammal			MIRc	2.153	1.1063	0.0002	0.0005893	2.7405	Mammal			MER21C_BT	2.1311	1.0916	0.001	0.0027143	3.6241	Ruminant
tRNA-Thr-ACY	10.4895	3.3909	0.0118	0.025285	13.0435	Mammal			MamGypLTR2b	2.1493	1.1039	0.0002	0.0005893	3.2505	Mammal			MLT1E3	2.1295	1.0905	0.001	0.0027143	3.2663	Unknown
AmnSINE1	10.471	3.3883	0.0002	0.00046695	14.8744	Mammal			Charlie4z	2.1429	1.0995	0.0002	0.0005893	2.8124	Unknown			LTR4_BT	2.1276	1.0892	0.001	0.0027143	3.405	Ruminant
Plat_L3	10.1173	3.3387	0.0002	0.00046695	14.1091	Mammal			MamRep4096	2.1402	1.0977	0.0002	0.0005893	3.3816	Mammal			L1MEg1	2.1253	1.0877	0.001	0.0027143	3.7356	Unknown
tRNA-Arg-AGA	9.8301	3.2972	0.0002	0.00046695	8	Mammal			MamRep564	2.117	1.082	0.0118	0.030753	2.7027	Mammal			LTR16A	2.125	1.0875	0.001	0.0027143	3.4142	Ruminant
Mam_R4	9.5079	3.2491	0.0002	0.00046695	15.2745	Mammal			L1ME4a	2.1073	1.0754	0.0002	0.0005893	4.1097	Unknown			HERV16-int	2.1233	1.0863	0.001	0.0027143	4.2069	Unknown
tRNA-Val-GTG	9.3992	3.2325	0.0002	0.00046695	9.4595	Mammal			MER102b	2.103	1.0725	0.0002	0.0005893	3.504	Mammal			MLT1D	2.1209	1.0847	0.001	0.0027143	3.5416	Unknown
UCON12A	9.0409	3.1765	0.0002	0.00046695	8.5106	Mammal			MamRep1527	2.086	1.0607	0.0002	0.0005893	3.6866	Mammal			MamGypLTR1a	2.1183	1.0829	0.001	0.0027143	2.4963	Mammal
tRNA-Ile-ATA	8.8897	3.1521	0.0002	0.00046695	8	Mammal			MER53	2.0652	1.0463	0.0002	0.0005893	2.7585	Mammal			MLT2F	2.1027	1.0723	0.001	0.0027143	3.7344	Unknown
X9_LINE	8.8129	3.1396	0.0002	0.00046695	10.9091	Mammal			Kanga1b	2.0418	1.0299	0.0118	0.030753	3.4247	Unknown			LTR85a	2.1002	1.0705	0.001	0.0027143	2.1295	Unknown
X6B_LINE	8.6678	3.1157	0.0002	0.00046695	11.6216	Mammal			MADE2	2.028	1.0201	0.0002	0.0005893	1.9952	Unknown			LTR33	2.094	1.0662	0.001	0.0027143	3.0127	Ruminant
tRNA-Asn-AAC	8.4559	3.08	0.0002	0.00046695	12.5	Mammal			MER113A	2.027	1.0194	0.0002	0.0005893	3.3742	Mammal			MER21C	2.0851	1.0601	0.001	0.0027143	3.9013	Unknown
MER124	8.2066	3.0368	0.0002	0.00046695	13.6622	Mammal			ORSL-2b	2.0185	1.0133	0.0002	0.0005893	3.0357	Unknown			MER5B	2.0851	1.0601	0.001	0.0027143	1.9402	Unknown
UCON4	8.1248	3.0223	0.0002	0.00046695	12.7119	Mammal			Charlie25	2.0073	1.0053	0.0002	0.0005893	5.5138	Unknown			MER34A1	2.0775	1.0548	0.001	0.0027143	2.3753	Unknown
tRNA-Met_	7.4687	2.9009	0.0002	0.00046695	5.7143	Mammal			MLT1G1-int	1.9763	0.9828	0.0118	0.030753	5.364	Unknown			MLT1H	2.067	1.0475	0.001	0.0027143	3.2099	Unknown
(CAAAT)n	7.3885	2.8853	0.012	0.025285	9.0909	Mammal			MER94	1.972	0.9797	0.0002	0.0005893	2.4002	Mammal			MLT1E2	2.0655	1.0465	0.001	0.0027143	3.5501	Unknown
tRNA-Val-GTA	7.2692	2.8618	0.012	0.025285	7.6923	Mammal			LTR37B	1.9693	0.9777	0.0002	0.0005893	3.6066	Unknown			LTR32_BT	2.0463	1.033	0.001	0.0027143	3.7139	Ruminant
MLT1E1-int	6.9489	2.7968	0.0118	0.025285	10	Mammal			MamRep1879	1.9385	0.9549	0.0118	0.030753	3.0952	Mammal			L1M3de	2.0413	1.0295	0.001	0.0027143	4.8685	Unknown
tRNA-Gln-CAG	6.9062	2.7879	0.0002	0.00046695	8.6207	Mammal			MLT1K	1.9371	0.9539	0.0002	0.0005893	3.9056	Unknown			MER124	2.0413	1.0295	0.001	0.0027143	2.0873	Unknown
MamRep434	6.5385	2.709	0.0002	0.00046695	10.6335	Mammal			MLT1L	1.9314	0.9497	0.0002	0.0005893	3.8646	Unknown			ERVL-E-int	2.021	1.0151	0.001	0.0027143	4.2152	Unknown
(AAATG)n	6.4359	2.6861	0.0118	0.025285	6.6667	Mammal			Helitron3Na_Mam	1.9292	0.948	0.0002	0.0005893	4.0053	Mammal			LTR39_BT	2.0151	1.0109	0.001	0.0027143	3.5277	Ruminant
tRNA-Phe-TTY	6.335	2.6633	0.0002	0.00046695	8	Mammal			Charlie8	1.8984	0.9248	0.0002	0.0005893	3.3006	Unknown			LTR79	2.0113	1.0081	0.001	0.0027143	2.4245	Unknown
tRNA-Met	6.2676	2.6479	0.0002	0.00046695	8.1633	Mammal			LTR16A2	1.8746	0.9066	0.0002	0.0005893	3.6697	Unknown			Charlie4z	2.0094	1.0067	0.001	0.0027143	1.7246	Unknown
X5B_LINE	6.2255	2.6382	0.0002	0.00046695	6.4935	Mammal			Charlie24	1.8565	0.8926	0.0002	0.0005893	3.3503	Unknown			HERVL40-int	1.9982	0.9987	0.001	0.0027143	3.8194	Unknown
LTR90A	5.9104	2.5632	0.0002	0.00046695	8.5603	Mammal			MER113	1.8467	0.885	0.0002	0.0005893	3.8551	Mammal			MLT1A0	1.9779	0.984	0.001	0.0027143	3.0944	Unknown
X3_LINE	5.2722	2.3984	0.0002	0.00046695	7.906	Mammal			Charlie7	1.8458	0.8843	0.0002	0.0005893	4.031	Unknown			MER34A	1.972	0.9797	0.001	0.0027143	2.734	Unknown
LTR90B	4.9518	2.3079	0.0002	0.00046695	7.5529	Mammal			Charlie6	1.8408	0.8803	0.0118	0.030753	5.4455	Unknown			ERVL-int	1.9712	0.9791	0.001	0.0027143	3.9792	Unknown
MamSINE1	4.742	2.2455	0.0002	0.00046695	8.2035	Mammal			LTR80A	1.8408	0.8804	0.0118	0.030753	3.4483	Unknown			LTR80B	1.9692	0.9776	0.001	0.0027143	3.7143	Unknown
MER94B	4.6582	2.2198	0.0002	0.00046695	7.4271	Mammal			L2c	1.8371	0.8774	0.0002	0.0005893	3.1779	Unknown			MLT1H1	1.9678	0.9766	0.001	0.0027143	3.0529	Unknown
CR1_Mam	4.5662	2.191	0.0002	0.00046695	8.3258	Mammal			MER5B	1.8078	0.8542	0.0002	0.0005893	2.3462	Mammal			LTR65	1.9653	0.9748	0.001	0.0027143	3.1977	Unknown
(CAATT)n	4.5642	2.1904	0.0002	0.00046695	4.8193	Mammal			Charlie2b	1.7923	0.8418	0.0002	0.0005893	3.775	Unknown			MER99	1.9623	0.9725	0.001	0.0027143	3.9711	Unknown
Tigger14a	4.3974	2.1366	0.0002	0.00046695	7.0388	Mammal			MamGypLTR1a	1.7798	0.8317	0.0118	0.030753	3.0837	Mammal			MER106B	1.9617	0.9721	0.001	0.0027143	2.5037	Unknown
(CAGC)n	4.3132	2.1087	0.0238	0.04706	6.8966	Mammal			Tigger12c	1.7769	0.8294	0.0118	0.030753	2.6448	Unknown			LTR40b	1.9615	0.972	0.001	0.0027143	3.2	Unknown
X7B_LINE	3.6369	1.8627	0.0002	0.00046695	5.3356	Mammal			LTR78	1.7745	0.8274	0.0002	0.0005893	3.7954	Unknown			ERV3-16A3_I-int	1.9599	0.9708	0.001	0.0027143	4.5858	Unknown
tRNA-Asp-GAY	3.1612	1.6605	0.0118	0.025285	4	Mammal			MIRb	1.7713	0.8248	0.0002	0.0005893	2.5604	Mammal			L1ME3F	1.955	0.9672	0.001	0.0027143	3.1679	Unknown
Charlie19a	3.1232	1.643	0.0002	0.00046695	5.4795	Mammal			Tigger13a	1.7665	0.8209	0.0002	0.0005893	3.3763	Unknown			MER5C1	1.951	0.9642	0.001	0.0027143	1.6241	Unknown
MamGyp-int	3.071	1.6187	0.0002	0.00046695	8.9888	Mammal			LTR82A	1.7584	0.8143	0.0118	0.030753	3.6916	Unknown			LTR67B	1.9483	0.9622	0.001	0.0027143	2.6149	Unknown
Charlie22a	3.0171	1.5932	0.0002	0.00046695	4.3165	Mammal			MER112	1.7357	0.7955	0.0002	0.0005893	3.1404	Mammal			MLT2B2	1.9474	0.9616	0.001	0.0027143	3.7473	Unknown
tRNA-Gly-GGA	2.9174	1.5447	0.0002	0.00046695	2.6316	Mammal			LTR78B	1.7234	0.7853	0.0002	0.0005893	3.3368	Unknown			MLT1N2	1.9283	0.9473	0.001	0.0027143	2.0913	Unknown
(TCCCC)n	2.9146	1.5433	0.0118	0.025285	4.698	Mammal			MER91A	1.719	0.7816	0.0118	0.030753	1.8205	Mammal			MER63A	1.9043	0.9292	0.001	0.0027143	2.5469	Unknown
Tigger10	2.8388	1.5053	0.0002	0.00046695	4.7478	Mammal			LTR67B	1.7037	0.7687	0.0002	0.0005893	2.6941	Unknown			MER21B	1.9035	0.9287	0.001	0.0027143	3.0109	Unknown
L3b	2.756	1.4626	0.0002	0.00046695	4.7502	Mammal			MER104	1.6693	0.7392	0.0002	0.0005893	1.9284	Mammal			LTR78B	1.9008	0.9266	0.001	0.0027143	2.9718	Unknown
(TCC)n	2.7193	1.4432	0.0002	0.00046695	2.9412	Mammal			LTR33B	1.6577	0.7292	0.0002	0.0005893	3.3175	Unknown			LTR82A	1.8938	0.9213	0.001	0.0027143	4.126	Unknown
Tigger16b	2.6958	1.4307	0.0002	0.00046695	4.4586	Mammal			MER63A	1.6397	0.7134	0.0118	0.030753	2.9044	Mammal			MER77	1.8892	0.9178	0.001	0.0027143	3.7464	Unknown
(GGA)n	2.6923	1.4288	0.0002	0.00046695	4.086	Mammal			LTR37A	1.6328	0.7074	0.0002	0.0005893	3.071	Unknown			MLT1F1	1.887	0.9161	0.001	0.0027143	2.8374	Unknown
MamRep564	2.686	1.4255	0.0002	0.00046695	3.4749	Mammal			MamRep137	1.6255	0.7009	0.0002	0.0005893	3.2997	Mammal			MLT1C	1.8844	0.9141	0.001	0.0027143	3.1084	Unknown
ORSL-2b	2.6097	1.3839	0.0002	0.00046695	5	Mammal			LTR79	1.6036	0.6814	0.0002	0.0005893	2.9809	Unknown			Charlie20a	1.8788	0.9098	0.001	0.0027143	2.9557	Unknown
X7C_LINE	2.5074	1.3262	0.0002	0.00046695	3.1477	Mammal			LTR16C	1.5931	0.6718	0.0002	0.0005893	3.5565	Unknown			MER45A	1.8724	0.9049	0.001	0.0027143	1.8519	Unknown
MamGypLTR2b	2.4745	1.3072	0.0002	0.00046695	4.0153	Mammal			Zaphod	1.5653	0.6464	0.0002	0.0005893	3.7893	Unknown			LTR83	1.8719	0.9045	0.001	0.0027143	2.6119	Unknown
Charlie26a	2.4201	1.2751	0.0002	0.00046695	4.5455	Mammal			MER102c	1.5171	0.6013	0.0118	0.030753	2.921	Mammal			MER63B	1.8662	0.9001	0.001	0.0027143	2.0408	Unknown
Charlie13b	2.3837	1.2532	0.0002	0.00046695	4.4369	Mammal			L1MEd	1.49	0.5753	0.0002	0.0005893	3.5301	Unknown			MLT1G1	1.8653	0.8994	0.001	0.0027143	2.9764	Unknown
Charlie13a	2.3758	1.2484	0.0002	0.00046695	6.235	Mammal			MIR	1.4866	0.572	0.0002	0.0005893	2.2452	Mammal			LTR33A	1.8646	0.8988	0.001	0.0027143	2.8977	Unknown
L5	2.3448	1.2295	0.0118	0.025285	5.0193	Mammal			Charlie4a	1.4751	0.5608	0.0002	0.0005893	3.0932	Unknown			MER5A	1.8623	0.8971	0.001	0.0027143	1.8595	Unknown
Tigger8	2.28	1.189	0.0002	0.00046695	4.1796	Mammal			MER46C	1.4737	0.5594	0.0118	0.030753	2.6269	Mammal			MLT1L	1.8605	0.8957	0.001	0.0027143	2.6143	Unknown
Kanga11a	2.2343	1.1598	0.0002	0.00046695	4.9767	Mammal			MLT1J	1.4682	0.554	0.0002	0.0005893	3.288	Unknown			LTR82B	1.8564	0.8925	0.001	0.0027143	2.9036	Unknown
MLT1H2-int	2.2	1.1375	0.0118	0.025285	5.8824	Mammal			MER5A	1.4519	0.5379	0.0002	0.0005893	1.9493	Mammal			MER63D	1.8533	0.8901	0.001	0.0027143	1.7103	Unknown
MARNA	2.1726	1.1195	0.0002	0.00046695	4.0816	Mammal			Arthur1	1.4394	0.5255	0.0002	0.0005893	3.55	Unknown			MLT2B4	1.8446	0.8833	0.001	0.0027143	2.6241	Unknown
(TCCC)n	2.1499	1.1043	0.0002	0.00046695	2.2535	Mammal			L2b	1.4204	0.5063	0.0002	0.0005893	2.4403	Unknown			MLT1G	1.8443	0.8831	0.001	0.0027143	3.2987	Unknown
MamRep1161	2.0839	1.0593	0.0002	0.00046695	3.4625	Mammal			MLT1G	1.4055	0.4911	0.0118	0.030753	3.3439	Unknown			LTR16B2	1.837	0.8773	0.001	0.0027143	3.3582	Unknown
Oamar1	2.0584	1.0415	0.0002	0.00046695	9.1884	Mammal			MER58B	1.4019	0.4874	0.0002	0.0005893	2.3902	Mammal			LTR13B_BT	1.8349	0.8757	0.001	0.0027143	2.5166	Ruminant
X7A_LINE	2.0414	1.0296	0.0002	0.00046695	3.5313	Mammal			HAL1b	1.3927	0.4779	0.0002	0.0005893	2.9347	Mammal			MLT1A	1.8345	0.8754	0.001	0.0027143	2.7862	Unknown
Charlie16a	1.9758	0.9824	0.0002	0.00046695	2.9772	Mammal			L1ME3C	1.3855	0.4704	0.0002	0.0005893	3.584	Unknown			LTR40c	1.8329	0.8741	0.001	0.0027143	2.2779	Unknown
Helitron2Na_Mam	1.9637	0.9736	0.0238	0.04706	4.7101	Mammal			L1M7	1.3649	0.4488	0.0118	0.030753	3.4158	Unknown			LTR33B	1.8328	0.8741	0.001	0.0027143	2.4645	Unknown
Tigger12	1.9626	0.9728	0.0002	0.00046695	3.3133	Mammal			MLT1J1	1.3643	0.4481	0.0118	0.030753	2.3863	Unknown			MLT1C-int	1.8326	0.8739	0.001	0.0027143	3.75	Unknown
(CGG)n	1.9257	0.9454	0.0002	0.00046695	3.1453	Mammal			MLT1I	1.359	0.4426	0.0002	0.0005893	2.5255	Unknown			Charlie4a	1.8299	0.8718	0.001	0.0027143	2.6201	Unknown
Charlie21a	1.8973	0.9239	0.0002	0.00046695	5.176	Mammal			MER20B	1.2988	0.3772	0.0158	0.040305	2.5096	Mammal			MLT1M	1.8193	0.8634	0.001	0.0027143	2.091	Unknown
Tigger15a	1.8528	0.8897	0.0002	0.00046695	3.6667	Mammal			MLT1J2	1.2947	0.3726	0.0118	0.030753	2.2727	Unknown			Charlie25	1.8189	0.8631	0.001	0.0027143	3.3835	Unknown
LTR81B	1.6735	0.7429	0.0118	0.025285	4.2857	Mammal			MLT1H	1.2821	0.3585	0.0002	0.0005893	2.7031	Unknown			MLT1B	1.8157	0.8605	0.001	0.0027143	2.7083	Unknown
L4	1.6513	0.7236	0.0002	0.00046695	3.6	Mammal			MER5A1	1.261	0.3346	0.0002	0.0005893	1.7821	Mammal			MER5A1	1.8146	0.8597	0.001	0.0027143	2.023	Unknown
Zaphod	1.5092	0.5938	0.0002	0.00046695	4.9454	Mammal			HAL1	1.2577	0.3307	0.0002	0.0005893	3.2481	Mammal			L1MEe	1.8056	0.8525	0.001	0.0027143	3.6251	Unknown
MamRep605	1.4646	0.5505	0.0118	0.025285	3.0999	Mammal			MER58A	1.2574	0.3304	0.0002	0.0005893	2.2647	Mammal			MER5C	1.8035	0.8508	0.001	0.0027143	2.0329	Unknown
L1M6	1.4049	0.4905	0.0118	0.025285	4.0352	Mammal			L2	1.1902	0.2513	0.0002	0.0005893	2.6622	Unknown			MLT1E1A	1.8033	0.8506	0.001	0.0027143	3.3091	Unknown
GC_rich	1.3726	0.4569	0.0002	0.00046695	2.2763	Mammal			L1MC5	1.1817	0.2409	0.0002	0.0005893	2.5917	Unknown			MLT1J1	1.8027	0.8502	0.001	0.0027143	2.5828	Unknown
																		MLT1F-int	1.8026	0.8501	0.001	0.0027143	2.75	Unknown
																		MamGypLTR1b	1.7987	0.8469	0.001	0.0027143	3.3557	Mammal
																		L1M4c	1.7953	0.8442	0.001	0.0027143	5.0045	Unknown
																		MLT1E	1.7953	0.8442	0.001	0.0027143	3.4615	Unknown
																		MER58A	1.7923	0.8418	0.001	0.0027143	2.3039	Unknown
																		Zaphod	1.7789	0.831	0.001	0.0027143	3.0829	Unknown
																		L1MA9	1.7747	0.8276	0.001	0.0027143	3.1938	Unknown
																		L1MC5	1.774	0.827	0.001	0.0027143	2.4913	Unknown
																		LTR50	1.7708	0.8244	0.001	0.0027143	2.5716	Unknown
																		ERV1-3-LTR_BT	1.7656	0.8201	0.001	0.0027143	3.125	Ruminant
																		MLT1J2	1.7646	0.8194	0.001	0.0027143	2.6094	Unknown
																		Charlie18a	1.7644	0.8192	0.001	0.0027143	2.0347	Unknown
																		MER58B	1.7638	0.8187	0.001	0.0027143	2.3415	Unknown
																		MLT1F2	1.7561	0.8124	0.001	0.0027143	3.2559	Unknown
																		MER46C	1.7363	0.796	0.001	0.0027143	2.3152	Unknown
																		MER45B	1.7309	0.7915	0.001	0.0027143	3.3622	Unknown
																		L1MCb	1.7243	0.786	0.001	0.0027143	4.3059	Unknown
																		LTR37B	1.7173	0.7802	0.001	0.0027143	2.4262	Unknown
																		LTR37A	1.7173	0.7801	0.001	0.0027143	2.2393	Unknown
																		MLT1G3	1.7167	0.7797	0.001	0.0027143	2.9047	Unknown
																		MIRb	1.6916	0.7584	0.001	0.0027143	1.8039	Unknown
																		Tigger2a_Art	1.6753	0.7444	0.001	0.0027143	1.9268	Ruminant
																		LTR16A1	1.6611	0.7321	0.001	0.0027143	2.6095	Unknown
																		MER58D	1.6599	0.7311	0.001	0.0027143	1.3613	Unknown
																		MIR	1.6511	0.7234	0.001	0.0027143	1.814	Unknown
																		L2	1.6493	0.7219	0.001	0.0027143	2.5852	Unknown
																		MER91A	1.6468	0.7196	0.001	0.0027143	1.7782	Unknown
																		Tigger13a	1.6451	0.7181	0.001	0.0027143	2.5322	Unknown
																		Tigger1	1.6449	0.718	0.001	0.0027143	4.409	Ruminant
																		L1MA6	1.6437	0.7169	0.001	0.0027143	2.2818	Unknown
																		L1M3	1.6413	0.7148	0.001	0.0027143	3.5106	Unknown
																		MER117	1.6334	0.7079	0.001	0.0027143	1.6908	Unknown
																		Tigger1a_Art	1.6266	0.7018	0.001	0.0027143	2.3228	Unknown
																		MLT1J	1.6225	0.6982	0.001	0.0027143	2.4233	Unknown
																		SINE2-1_BT	1.6202	0.6961	0.001	0.0027143	1.5746	Ruminant
																		Tigger7	1.6196	0.6957	0.001	0.0027143	3.0043	Unknown
																		MER89	1.6171	0.6934	0.001	0.0027143	3.0146	Ruminant
																		L1MEd	1.6117	0.6885	0.001	0.0027143	2.8124	Unknown
																		L2a	1.6098	0.6869	0.001	0.0027143	2.4202	Unknown
																		MLT1K	1.6084	0.6856	0.001	0.0027143	2.441	Unknown
																		L1M2	1.6012	0.6792	0.001	0.0027143	3.2701	Ruminant
																		L1MEf	1.5939	0.6726	0.001	0.0027143	3.588	Unknown
																		L1M3c	1.593	0.6717	0.001	0.0027143	3.8196	Unknown
																		MER96B	1.5878	0.667	0.001	0.0027143	2.0484	Unknown
																		HAL1b	1.5758	0.6561	0.001	0.0027143	2.4613	Unknown
																		MIR3	1.5756	0.6559	0.001	0.0027143	1.441	Unknown
																		L1ME3	1.5746	0.655	0.001	0.0027143	2.9995	Unknown
																		L1MEg	1.5744	0.6548	0.001	0.0027143	3.1325	Unknown
																		Tigger5	1.5678	0.6487	0.001	0.0027143	2.0424	Ruminant
																		MLT1F	1.5638	0.645	0.001	0.0027143	2.8529	Unknown
																		L1M7	1.557	0.6388	0.001	0.0027143	2.7483	Unknown
																		L1ME1	1.5554	0.6372	0.001	0.0027143	3.1736	Unknown
																		MIRc	1.5522	0.6343	0.001	0.0027143	1.5138	Unknown
																		MLT1I	1.5516	0.6337	0.001	0.0027143	2.3932	Unknown
																		L2b	1.5502	0.6324	0.001	0.0027143	1.9557	Unknown
																		L2c	1.5473	0.6297	0.001	0.0027143	2.0315	Unknown
																		MER103C	1.5446	0.6272	0.001	0.0027143	1.8623	Mammal
																		L1MC4a	1.5439	0.6266	0.001	0.0027143	2.6672	Unknown
																		L1MA10	1.5399	0.6228	0.001	0.0027143	2.2364	Unknown
																		Charlie7	1.5369	0.62	0.001	0.0027143	2.5581	Unknown
																		Charlie19a	1.5345	0.6178	0.001	0.0027143	2.0548	Unknown
																		Charlie5	1.5341	0.6174	0.001	0.0027143	2.0084	Unknown
																		L3b	1.5254	0.6092	0.001	0.0027143	1.4394	Unknown
																		HAL1	1.5204	0.6044	0.001	0.0027143	2.83	Unknown
																		L4	1.5115	0.596	0.001	0.0027143	1.8743	Unknown
																		ERVL-B4-int	1.51	0.5945	0.001	0.0027143	3.9727	Unknown
																		Charlie15a	1.5092	0.5938	0.001	0.0027143	1.5633	Unknown
																		MER74A	1.5057	0.5905	0.001	0.0027143	2.9646	Unknown
																		CT-rich	1.504	0.5888	0.001	0.0027143	1.2668	Unknown
																		MamRep1527	1.5031	0.588	0.001	0.0027143	2.4194	Mammal
																		L1MC4	1.4999	0.5848	0.001	0.0027143	2.532	Unknown
																		L1ME3E	1.4884	0.5737	0.001	0.0027143	2.6406	Unknown
																		L1M5	1.4855	0.5709	0.001	0.0027143	2.3007	Unknown
																		MamRep605	1.4846	0.5701	0.001	0.0027143	1.9329	Mammal
																		L1M4b	1.482	0.5676	0.001	0.0027143	3.0175	Unknown
																		MER20	1.4802	0.5658	0.001	0.0027143	1.873	Unknown
																		LTR39D_BT	1.4789	0.5645	0.001	0.0027143	3.1227	Ruminant
																		L1ME2	1.4774	0.5631	0.001	0.0027143	2.8777	Unknown
																		L1MD	1.475	0.5607	0.001	0.0027143	2.4931	Unknown
																		L3	1.4746	0.5603	0.001	0.0027143	1.9499	Unknown
																		ORSL-2b	1.4668	0.5526	0.001	0.0027143	2.5	Unknown
																		MER112	1.4627	0.5486	0.001	0.0027143	1.8701	Unknown
																		Charlie1b	1.4605	0.5464	0.001	0.0027143	1.9238	Unknown
																		L1MB4	1.4576	0.5436	0.001	0.0027143	2.8215	Unknown
																		MER20B	1.4541	0.5401	0.001	0.0027143	1.9868	Unknown
																		L1M4	1.4492	0.5353	0.001	0.0027143	2.862	Unknown
																		L1MC3	1.4406	0.5267	0.001	0.0027143	2.9533	Unknown
																		L1MB8	1.4338	0.5198	0.001	0.0027143	2.8319	Unknown
																		MER2B	1.4213	0.5072	0.001	0.0027143	1.7276	Ruminant
																		L1MB7	1.4179	0.5038	0.001	0.0027143	2.8489	Unknown
																		L1ME3A	1.416	0.5018	0.001	0.0027143	2.7851	Unknown
																		LTR41B	1.4111	0.4968	0.001	0.0027143	2.2667	Unknown
																		L1MDa	1.4042	0.4897	0.001	0.0027143	3.3531	Unknown
																		L1M6	1.4037	0.4892	0.001	0.0027143	2.5349	Unknown
																		MER113	1.403	0.4885	0.001	0.0027143	1.9661	Unknown
																		L1MC1	1.4028	0.4883	0.001	0.0027143	2.8993	Unknown
																		L1ME3B	1.3931	0.4783	0.001	0.0027143	2.6597	Unknown
																		L1MC	1.393	0.4782	0.001	0.0027143	2.1414	Unknown
																		L1MB2	1.3843	0.4692	0.001	0.0027143	2.6831	Unknown
																		L1MEc	1.3786	0.4632	0.001	0.0027143	3.1199	Unknown
																		MER41_BT	1.3336	0.4153	0.001	0.0027143	2.1595	Ruminant
																		L1MCa	1.3267	0.4079	0.001	0.0027143	3.2789	Unknown
																		MER3	1.3243	0.4053	0.001	0.0027143	1.5814	Unknown
																		MER33	1.3198	0.4004	0.001	0.0027143	1.7253	Unknown
																		L1MB5	1.3076	0.3869	0.001	0.0027143	2.5414	Unknown
																		L1MB3	1.3048	0.3838	0.001	0.0027143	2.3681	Unknown
																		MER90a	1.2623	0.3361	0.001	0.0027143	2.343	Unknown
																		L1ME2z	1.2579	0.331	0.001	0.0027143	2.3272	Unknown
																		L1ME4a	1.2505	0.3225	0.001	0.0027143	1.8992	Unknown
																		L1MC2	1.2498	0.3217	0.001	0.0027143	2.285	Unknown
																		L1ME3D	1.2294	0.298	0.001	0.0027143	2.5418	Unknown
																		L1ME3C	1.22	0.2869	0.001	0.0027143	2.3564	Unknown
																		L1-2_BT	1.2111	0.2763	0.001	0.0027143	2.0847	Ruminant
																		L1MD2	1.1883	0.2489	0.001	0.0027143	2.5974	Unknown
																		LTR1_BT	1.1797	0.2384	0.001	0.0027143	2.3762	Ruminant
