# Supplementary material for: Evolution of gene regulation in ruminants differs between evolutionary breakpoint regions and homologous synteny blocks
Source: HighWire-hosted journal article supplement (doi:10.1101/gr.239863.118), 2019-02-13
Supplement: Supplemental_Table_S13.xlsx [file Supplemental_Table_S13.xlsx]

## Sheet: Sheet1
Supplemental Table 13. Motifs of the transcription factor binding sites (TFBSs) found in enhancers near three different types of EBRs.
Motif	JasparID	Bovid-Cattle	Ruminant	Cetartiodactyl	NoEBR	p-value	Bonferroni p-value	Family
TFAP2A_var.3	MA0872.1	65	44	8	8927	5.58831e-15	8.6954e-12	AP-2
KLF5	MA0599.1	143	119	51	27163	3.22145e-13	5.01258e-10	Three-zinc finger Krüppel-related factors
TFAP2C_var.3	MA0815.1	59	54	8	9001	6.82891e-12	1.06258e-08	AP-2
SP2	MA0516.1	173	165	57	36059	1.02671e-11	1.59756e-08	Three-zinc finger Krüppel-related factors
SP1	MA0079.3	163	158	58	34479	2.22778e-10	3.46643e-07	Three-zinc finger Krüppel-related factors
SP3	MA0746.1	114	85	40	22090	2.97303e-10	4.62604e-07	Three-zinc finger Krüppel-related factors
Klf4	MA0039.2	100	81	26	19093	1.78088e-09	2.77105e-06	Three-zinc finger Krüppel-related factors
ZNF740	MA0753.1	100	73	31	19663	7.70598e-09	1.19905e-05	Other factors with up to three adjacent zinc fingers
KLF14	MA0740.1	59	50	10	9905	1.02055e-08	1.58797e-05	Three-zinc finger Krüppel-related factors
GLIS1	MA0735.1	117	165	29	28495	1.95765e-08	3.04611e-05	More than 3 adjacent zinc finger factors
SP8	MA0747.1	95	78	37	18652	4.17087e-08	6.48987e-05	Three-zinc finger Krüppel-related factors
KLF16	MA0741.1	110	110	42	22575	4.30907e-08	6.70491e-05	Three-zinc finger Krüppel-related factors
RREB1	MA0073.1	70	41	31	13514	5.38928e-08	8.38572e-05	Factors with multiple dispersed zinc fingers
SP4	MA0685.1	107	102	32	21923	5.98228e-08	9.30843e-05	Three-zinc finger Krüppel-related factors
GLIS2	MA0736.1	55	48	13	9558	4.7987e-07	0.000746678	More than 3 adjacent zinc finger factors
PLAG1	MA0163.1	46	45	17	7822	8.30832e-07	0.00129277	More than 3 adjacent zinc finger factors
TFAP2B_var.3	MA0813.1	63	65	14	12111	1.05681e-06	0.0016444	AP-2
IRF1	MA0050.2	56	155	80	39675	1.08751e-06	0.00169217	Interferon-regulatory factors
HIC2	MA0738.1	39	53	15	7322	1.12329e-06	0.00174783	Factors with multiple dispersed zinc fingers
ZIC1	MA0696.1	70	74	19	13967	2.46864e-06	0.00384121	More than 3 adjacent zinc finger factors
TFAP2A_var.2	MA0810.1	58	55	15	10872	4.56135e-06	0.00709747	AP-2
TFAP2C	MA0524.2	50	36	13	8914	7.04827e-06	0.0109671	AP-2
ZIC3	MA0697.1	51	61	17	9966	9.04532e-06	0.0140745	More than 3 adjacent zinc finger factors
TFAP2B	MA0811.1	49	41	13	8917	2.13873e-05	0.0332787	AP-2
CTCF	MA0139.1	66	71	26	13563	2.94244e-05	0.0457844	More than 3 adjacent zinc finger factors
Zfx	MA0146.2	66	98	23	15843	4.36484e-05	0.0679169	More than 3 adjacent zinc finger factors
TFAP2B_var.2	MA0812.1	41	28	11	7351	7.2004e-05	0.112038	AP-2
Klf1	MA0493.1	69	69	19	14673	7.56983e-05	0.117787	Three-zinc finger Krüppel-related factors
HINFP	MA0131.2	19	9	3	2544	9.85128e-05	0.153286	Factors with multiple dispersed zinc fingers
ZBTB7C	MA0695.1	32	30	10	5383	0.000100712	0.156707	More than 3 adjacent zinc finger factors
EGR1	MA0162.2	109	125	40	26207	0.000201583	0.313663	Three-zinc finger Krüppel-related factors
GLIS3	MA0737.1	39	51	8	8324	0.000239717	0.373	More than 3 adjacent zinc finger factors
EGR3	MA0732.1	51	45	14	10221	0.00027622	0.429799	Three-zinc finger Krüppel-related factors
TFAP2A	MA0003.3	41	27	12	7919	0.000319845	0.497678	AP-2
Alx1	MA0854.1	9	20	7	3494	0.679846	1	Paired-related HD factors
ALX3	MA0634.1	7	13	7	3300	0.8126	1	Paired-related HD factors
Alx4	MA0853.1	8	18	5	3229	0.771307	1	Paired-related HD factors
Ar	MA0007.3	12	26	11	4930	0.640355	1	Steroid hormone receptors (NR3)
Arid3b	MA0601.1	21	33	8	7873	0.479768	1	ARID-related factors
Arid5a	MA0602.1	10	23	11	6437	0.215215	1	ARID-related factors
Arnt	MA0004.1	0	0	1	199	0.444086	1	PAS domain factors
ARNT::HIF1A	MA0259.1	12	12	2	2196	0.0677282	1	PAS domain factors
Arntl	MA0603.1	15	11	12	3723	0.0338389	1	PAS domain factors
Arx	MA0874.1	9	27	12	3328	0.00080444	1	Paired-related HD factors
Ascl2	MA0816.1	30	53	15	10519	0.681619	1	MyoD / ASC-related factors
Atf1	MA0604.1	1	5	1	1296	0.449155	1	CREB-related factors
Atf3	MA0605.1	5	5	1	1946	0.360538	1	Fos-related factors
ATF4	MA0833.1	11	24	8	4922	0.858032	1	ATF-4-related factors
ATF7	MA0834.1	4	7	4	2617	0.345786	1	Jun-related factors
Atoh1	MA0461.2	6	20	8	2885	0.0966787	1	Tal-related factors
Bach1::Mafk	MA0591.1	31	45	19	10684	0.979008	1	Jun-related factors/Maf-related factors
Barhl1	MA0877.1	7	12	4	2953	0.918725	1	NK-related factors
BARHL2	MA0635.1	1	11	0	1491	0.0481605	1	NK-related factors
BARX1	MA0875.1	4	12	4	2515	0.715918	1	NK-related factors
BATF::JUN	MA0462.1	14	29	16	8949	0.0575536	1	B-ATF-related factors/Jun-related factors
BATF3	MA0835.1	12	20	12	4603	0.5617	1	B-ATF-related factors
Bcl6	MA0463.1	24	52	28	13334	0.0961296	1	More than 3 adjacent zinc finger factors
BCL6B	MA0731.1	17	59	21	12013	0.0355531	1	More than 3 adjacent zinc finger factors
Bhlha15	MA0607.1	13	25	7	4863	0.843708	1	Tal-related factors
BHLHE22	MA0818.1	3	11	6	1754	0.179479	1	Tal-related factors
BHLHE23	MA0817.1	3	17	6	2514	0.114206	1	Tal-related factors
BHLHE40	MA0464.2	7	7	5	2769	0.510339	1	Hairy-related factors
BHLHE41	MA0636.1	7	10	9	3382	0.271822	1	Hairy-related factors
BSX	MA0876.1	8	18	5	3289	0.792781	1	NK-related factors
CDX1	MA0878.1	15	12	11	6451	0.0183525	1	HOX-related factors
CDX2	MA0465.1	14	21	12	7371	0.103844	1	HOX-related factors
CEBPA	MA0102.3	10	28	12	6452	0.318719	1	C/EBP-related
CEBPB	MA0466.2	0	11	2	2061	0.0788957	1	C/EBP-related
CEBPD	MA0836.1	0	8	2	1892	0.124367	1	C/EBP-related
CEBPE	MA0837.1	0	7	2	1752	0.152832	1	C/EBP-related
CEBPG	MA0838.1	0	10	2	1980	0.0997585	1	C/EBP-related
CENPB	MA0637.1	7	10	4	1241	0.0316072	1	C/EBP-related
CLOCK	MA0819.1	8	5	7	2962	0.127785	1	PAS domain factors
CREB1	MA0018.2	10	18	7	3911	0.992299	1	CREB-related factors
CREB3	MA0638.1	7	7	4	2418	0.72887	1	CREB-related factors
CREB3L1	MA0839.1	12	10	10	3832	0.19334	1	CREB-related factors
Creb3l2	MA0608.1	7	8	7	3639	0.16656	1	CREB-related factors
Creb5	MA0840.1	6	6	6	3102	0.158787	1	CREB-related factors
Crem	MA0609.1	0	2	2	1066	0.210319	1	CREB-related factors
Crx	MA0467.1	14	33	10	5494	0.361543	1	Paired-related HD factors
CUX1	MA0754.1	3	7	0	1651	0.331917	1	HD-CUT factors
CUX2	MA0755.1	3	9	0	1675	0.28076	1	HD-CUT factors
DBP	MA0639.1	3	5	3	1924	0.477321	1	C/EBP-related
Ddit3::Cebpa	MA0019.1	8	13	9	4685	0.182347	1	C/EBP-related
Dlx1	MA0879.1	0	11	4	2448	0.0788776	1	NK-related factors
Dlx2	MA0885.1	6	9	3	1740	0.917354	1	NK-related factors
Dlx3	MA0880.1	9	10	5	2905	0.861416	1	NK-related factors
Dlx4	MA0881.1	8	7	4	2206	0.710469	1	NK-related factors
DLX6	MA0882.1	9	6	4	2227	0.419977	1	NK-related factors
Dmbx1	MA0883.1	10	15	6	3117	0.943469	1	Paired-related HD factors
DMRT3	MA0610.1	6	16	8	3842	0.50533	1	DMRT
Dux	MA0611.1	5	19	5	3475	0.355296	1	Paired-related HD factors
DUX4	MA0468.1	12	27	10	5504	0.803469	1	Paired-related HD factors
DUXA	MA0884.1	9	30	10	4603	0.105734	1	Paired-related HD factors
E2F1	MA0024.3	1	0	1	654	0.351876	1	E2F-related factors
E2F2	MA0864.1	1	1	2	694	0.500679	1	E2F-related factors
E2F3	MA0469.2	7	6	7	2879	0.213944	1	E2F-related factors
E2F4	MA0470.1	21	26	5	4690	0.0585401	1	E2F-related factors
E2F6	MA0471.1	39	72	27	14661	0.818644	1	E2F-related factors
E2F7	MA0758.1	28	62	22	14316	0.289741	1	E2F-related factors
E2F8	MA0865.1	13	25	6	4574	0.659529	1	E2F-related factors
EBF1	MA0154.3	41	70	22	12849	0.279281	1	Early B-Cell Factor-related factors
EGR2	MA0472.2	24	18	3	4263	0.00161293	1	Three-zinc finger Krüppel-related factors
EGR4	MA0733.1	44	38	12	8923	0.00118727	1	Three-zinc finger Krüppel-related factors
EHF	MA0598.2	16	25	7	4773	0.683451	1	Ets-related factors
ELF1	MA0473.2	11	27	8	4922	0.618026	1	Ets-related factors
ELF3	MA0640.1	24	35	12	6492	0.332701	1	Ets-related factors
ELF4	MA0641.1	23	26	10	4954	0.0652663	1	Ets-related factors
ELF5	MA0136.2	21	31	13	6368	0.739222	1	Ets-related factors
ELK1	MA0028.2	7	11	4	2420	0.998534	1	Ets-related factors
ELK3	MA0759.1	9	12	4	2328	0.732409	1	Ets-related factors
ELK4	MA0076.2	20	36	10	6213	0.373123	1	Ets-related factors
EMX1	MA0612.1	4	12	7	2715	0.431981	1	NK-related factors
EMX2	MA0886.1	2	8	5	1796	0.405868	1	NK-related factors
EN1	MA0027.2	2	9	2	1638	0.554172	1	NK-related factors
EN2	MA0642.1	4	14	5	1961	0.225622	1	NK-related factors
EOMES	MA0800.1	15	33	13	5430	0.198782	1	TBrain-related factors
ERF	MA0760.1	13	22	4	3373	0.148339	1	Ets-related factors
ERG	MA0474.2	17	17	5	3226	0.0496452	1	Ets-related factors
ESR1	MA0112.3	28	48	20	10479	0.965996	1	Steroid hormone receptors (NR3)
ESR2	MA0258.2	49	65	24	13435	0.234007	1	Steroid hormone receptors (NR3)
Esrra	MA0592.2	27	44	25	11290	0.428754	1	Steroid hormone receptors (NR3)
ESRRB	MA0141.3	24	52	23	11308	0.503425	1	Steroid hormone receptors (NR3)
Esrrg	MA0643.1	16	28	15	7707	0.455822	1	Steroid hormone receptors (NR3)
ESX1	MA0644.1	4	9	7	2600	0.34341	1	Paired-related HD factors
ETS1	MA0098.3	16	22	6	3493	0.0768846	1	Ets-related factors
ETV1	MA0761.1	7	9	3	1949	0.910601	1	Ets-related factors
ETV2	MA0762.1	16	27	8	4772	0.527958	1	Ets-related factors
ETV3	MA0763.1	9	13	5	2603	0.877211	1	Ets-related factors
ETV4	MA0764.1	9	11	4	1972	0.397958	1	Ets-related factors
ETV5	MA0765.1	7	9	3	1700	0.705634	1	Ets-related factors
ETV6	MA0645.1	14	31	7	5353	0.413563	1	Ets-related factors
EVX1	MA0887.1	5	8	2	2015	0.850993	1	HOX-related factors
EVX2	MA0888.1	3	9	3	1878	0.799907	1	HOX-related factors
EWSR1-FLI1	MA0149.1	100	187	58	33834	0.0218292	1	Ets-related factors
FEV	MA0156.2	10	14	5	2511	0.539613	1	Ets-related factors
FIGLA	MA0820.1	22	53	25	9707	0.0680398	1	Tal-related factors
FLI1	MA0475.2	14	15	3	2923	0.139951	1	Ets-related factors
FOS	MA0476.1	16	22	15	7158	0.239737	1	Fos-related factors
FOS::JUN	MA0099.2	12	24	15	6644	0.236464	1	Fos-related factors/Jun-related factors
FOSL1	MA0477.1	15	26	11	6837	0.690206	1	Fos-related factors
FOSL2	MA0478.1	26	40	20	11603	0.301636	1	Fos-related factors
FOXA1	MA0148.3	22	39	12	10335	0.215765	1	Forkhead box (FOX) factors
Foxa2	MA0047.2	25	36	12	10164	0.269226	1	Forkhead box (FOX) factors
FOXB1	MA0845.1	21	41	16	10689	0.300531	1	Forkhead box (FOX) factors
FOXC1	MA0032.2	20	41	18	11312	0.120271	1	Forkhead box (FOX) factors
FOXC2	MA0846.1	26	58	19	14235	0.100341	1	Forkhead box (FOX) factors
FOXD1	MA0031.1	10	19	7	4482	0.901801	1	Forkhead box (FOX) factors
FOXD2	MA0847.1	10	19	7	4486	0.900291	1	Forkhead box (FOX) factors
Foxd3	MA0041.1	35	51	29	16578	0.0249466	1	Forkhead box (FOX) factors
FOXF2	MA0030.1	15	25	11	6119	0.942018	1	Forkhead box (FOX) factors
FOXG1	MA0613.1	19	30	11	7130	0.967928	1	Forkhead box (FOX) factors
FOXH1	MA0479.1	10	27	15	7109	0.114178	1	Forkhead box (FOX) factors
FOXI1	MA0042.2	10	19	7	4486	0.900291	1	Forkhead box (FOX) factors
Foxj2	MA0614.1	14	25	7	5200	0.88745	1	Forkhead box (FOX) factors
Foxj3	MA0851.1	24	50	19	11470	0.586177	1	Forkhead box (FOX) factors
Foxk1	MA0852.1	22	60	26	11416	0.0858397	1	Forkhead box (FOX) factors
FOXL1	MA0033.2	0	0	0	167	0.68428	1	Forkhead box (FOX) factors
Foxo1	MA0480.1	22	51	18	11446	0.372726	1	Forkhead box (FOX) factors
FOXO3	MA0157.2	16	25	11	6696	0.777897	1	Forkhead box (FOX) factors
FOXO4	MA0848.1	10	19	7	4486	0.900291	1	Forkhead box (FOX) factors
FOXO6	MA0849.1	10	19	7	4486	0.900291	1	Forkhead box (FOX) factors
FOXP1	MA0481.1	56	135	52	32600	0.00305347	1	Forkhead box (FOX) factors
FOXP2	MA0593.1	23	41	18	11433	0.22841	1	Forkhead box (FOX) factors
FOXP3	MA0850.1	10	19	7	4486	0.900291	1	Forkhead box (FOX) factors
Foxq1	MA0040.1	16	28	12	8087	0.285375	1	Forkhead box (FOX) factors
Gabpa	MA0062.2	12	23	4	4369	0.495164	1	Ets-related factors
Gata1	MA0035.3	10	34	17	7214	0.0820943	1	GATA-type zinc fingers
GATA1::TAL1	MA0140.2	4	22	5	5224	0.0241272	1	GATA-type zinc fingers/Tal-related factors
GATA2	MA0036.2	6	29	11	6654	0.0386006	1	GATA-type zinc fingers
GATA3	MA0037.2	8	29	16	6887	0.0492609	1	GATA-type zinc fingers
Gata4	MA0482.1	10	28	15	6704	0.171848	1	GATA-type zinc fingers
GATA5	MA0766.1	3	19	9	4526	0.0587096	1	GATA-type zinc fingers
GBX1	MA0889.1	4	9	6	1926	0.482513	1	HOX-related factors
GBX2	MA0890.1	4	12	7	2498	0.401279	1	HOX-related factors
GCM1	MA0646.1	10	22	7	3332	0.278043	1	GCM factors
GCM2	MA0767.1	6	16	8	2834	0.348254	1	GCM factors
Gfi1	MA0038.1	13	24	9	7949	0.0312705	1	More than 3 adjacent zinc finger factors
Gfi1b	MA0483.1	15	38	9	10158	0.00985934	1	More than 3 adjacent zinc finger factors
GLI2	MA0734.1	25	23	11	5182	0.0398227	1	More than 3 adjacent zinc finger factors
Gmeb1	MA0615.1	1	6	2	788	0.435456	1	GMEB
GMEB2	MA0862.1	2	2	0	450	0.743566	1	GMEB
GRHL1	MA0647.1	7	10	4	2721	0.920638	1	Grainyhead-related factors
GSC	MA0648.1	5	17	4	2850	0.429656	1	Paired-related HD factors
GSC2	MA0891.1	8	21	7	3034	0.185809	1	Paired-related HD factors
GSX1	MA0892.1	2	16	12	3090	0.00350975	1	HOX-related factors
GSX2	MA0893.1	5	14	8	4054	0.218445	1	HOX-related factors
Hand1::Tcf3	MA0092.1	25	27	10	8295	0.251885	1	Tal-related factors/E2A-related factors
Hes1	MA1099.1	12	10	2	2366	0.130666	1	Hairy-related factors
Hes2	MA0616.1	11	12	7	3490	0.776816	1	Hairy-related factors
HES5	MA0821.1	22	25	4	6096	0.121299	1	Hairy-related factors
HES7	MA0822.1	20	19	2	4881	0.0385985	1	Hairy-related factors
HESX1	MA0894.1	3	8	8	2252	0.0962333	1	Paired-related HD factors
HEY1	MA0823.1	9	7	4	3096	0.302569	1	Hairy-related factors
HEY2	MA0649.1	12	10	4	3286	0.41369	1	Hairy-related factors
Hic1	MA0739.1	21	46	6	6662	0.00661223	1	Factors with multiple dispersed zinc fingers
HLF	MA0043.2	3	3	1	2327	0.0258784	1	C/EBP-related
HLTF	MA0109.1	8	22	14	4717	0.105582	1	Myb/SANT domain factors
HMBOX1	MA0895.1	5	8	3	2779	0.373877	1	POU domain factors
Hmx1	MA0896.1	6	11	4	3450	0.368358	1	NK-related factors
Hmx2	MA0897.1	11	12	6	4460	0.313457	1	NK-related factors
Hmx3	MA0898.1	7	15	4	4654	0.100658	1	NK-related factors
HNF1A	MA0046.2	21	26	11	7049	0.775905	1	POU domain factors
HNF1B	MA0153.2	15	22	6	5484	0.678837	1	POU domain factors
Hnf4a	MA0114.3	46	84	31	18282	0.907588	1	RXR-related receptors (NR2)
HNF4G	MA0484.1	44	70	30	16461	0.97206	1	RXR-related receptors (NR2)
HOXA10	MA0899.1	14	15	11	6798	0.0318518	1	HOX-related factors
Hoxa11	MA0911.1	2	11	3	2309	0.343952	1	HOX-related factors
HOXA13	MA0650.1	13	20	15	7222	0.0607694	1	HOX-related factors
HOXA2	MA0900.1	6	12	4	2060	0.80879	1	HOX-related factors
HOXA5	MA0158.1	8	23	8	6423	0.0637334	1	HOX-related factors
Hoxa9	MA0594.1	10	17	7	5004	0.461573	1	HOX-related factors
HOXB13	MA0901.1	11	23	15	7128	0.0816812	1	HOX-related factors
HOXB2	MA0902.1	5	9	5	2510	0.792561	1	HOX-related factors
HOXB3	MA0903.1	4	12	9	3137	0.164975	1	HOX-related factors
Hoxb5	MA0904.1	8	12	10	4011	0.256475	1	HOX-related factors
HOXC10	MA0905.1	7	15	7	3179	0.843842	1	HOX-related factors
HOXC11	MA0651.1	3	9	5	2275	0.549014	1	HOX-related factors
HOXC12	MA0906.1	3	13	6	2643	0.373202	1	HOX-related factors
HOXC13	MA0907.1	2	15	7	3440	0.106087	1	HOX-related factors
Hoxc9	MA0485.1	12	17	8	4951	0.718321	1	HOX-related factors
HOXD11	MA0908.1	5	11	7	2733	0.564836	1	HOX-related factors
HOXD12	MA0873.1	2	12	3	2126	0.333048	1	HOX-related factors
HOXD13	MA0909.1	11	25	14	6986	0.172045	1	HOX-related factors
Hoxd3	MA0912.1	14	17	10	4471	0.741163	1	HOX-related factors
Hoxd8	MA0910.1	19	29	7	7915	0.194013	1	HOX-related factors
Hoxd9	MA0913.1	18	14	15	7048	0.0169295	1	HOX-related factors
HSF1	MA0486.2	16	34	10	8340	0.287299	1	HSF factors
HSF2	MA0770.1	16	30	12	8168	0.348964	1	HSF factors
HSF4	MA0771.1	10	26	12	5981	0.415744	1	HSF factors
Id2	MA0617.1	12	13	9	4388	0.499142	1	HLH domain only
ID4	MA0824.1	35	63	26	10566	0.0198952	1	HLH domain only
INSM1	MA0155.1	41	50	23	11758	0.457557	1	Factors with multiple dispersed zinc fingers
IRF2	MA0051.1	9	25	7	4298	0.456216	1	Interferon-regulatory factors
IRF7	MA0772.1	20	66	20	13537	0.0258847	1	Interferon-regulatory factors
IRF8	MA0652.1	50	117	39	26525	0.0364426	1	Interferon-regulatory factors
IRF9	MA0653.1	41	120	37	23193	0.00901722	1	Interferon-regulatory factors
ISL2	MA0914.1	8	8	8	3843	0.128572	1	HD-LIM factors
ISX	MA0654.1	3	12	7	2354	0.240121	1	Paired-related HD factors
JDP2	MA0655.1	6	18	7	5107	0.112293	1	Fos-related factors
JDP2_var.2	MA0656.1	15	17	13	5035	0.333357	1	Fos-related factors
JUN	MA0488.1	23	40	9	8173	0.509901	1	Jun-related factors
JUN_var.2	MA0489.1	18	37	18	9383	0.375785	1	Jun-related factors
JUNB	MA0490.1	15	29	18	9540	0.0273469	1	Jun-related factors
JUND	MA0491.1	14	22	13	6385	0.480841	1	Jun-related factors
JUND_var.2	MA0492.1	17	30	9	7744	0.406716	1	Jun-related factors
Klf12	MA0742.1	44	48	18	10410	0.0448349	1	Three-zinc finger Krüppel-related factors
KLF13	MA0657.1	32	43	16	8713	0.373666	1	Three-zinc finger Krüppel-related factors
LBX1	MA0618.1	1	6	5	1754	0.19397	1	NK-related factors
LBX2	MA0699.1	4	11	6	2481	0.602198	1	NK-related factors
LEF1	MA0768.1	19	55	21	12081	0.0994743	1	TCF-7-related factors
LHX2	MA0700.1	3	13	6	2592	0.372124	1	HD-LIM factors
Lhx3	MA0135.1	28	22	9	6125	0.0381704	1	HD-LIM factors
Lhx4	MA0704.1	4	11	5	2052	0.687724	1	HD-LIM factors
LHX6	MA0658.1	6	10	7	1992	0.283868	1	HD-LIM factors
Lhx8	MA0705.1	2	9	9	2264	0.0229383	1	HD-LIM factors
LHX9	MA0701.1	3	12	7	2370	0.244176	1	HD-LIM factors
LIN54	MA0619.1	8	34	10	7811	0.023303	1	CRC domain
LMX1A	MA0702.1	6	10	5	2652	0.911666	1	HD-LIM factors
LMX1B	MA0703.1	6	10	5	2744	0.868317	1	HD-LIM factors
MAF::NFE2	MA0501.1	34	50	21	12234	0.956229	1	Maf-related factors/Jun-related factors
Mafb	MA0117.2	12	29	15	6350	0.358455	1	Maf-related factors
MAFF	MA0495.1	20	35	21	8687	0.347291	1	Maf-related factors
MAFG	MA0659.1	12	15	9	3882	0.758022	1	Maf-related factors
MAFK	MA0496.1	17	36	19	8719	0.353608	1	Maf-related factors
MAX	MA0058.3	12	9	6	3557	0.338717	1	bHLH-ZIP factors
MAX::MYC	MA0059.1	15	10	6	4809	0.0768716	1	bHLH-ZIP factors
Mecom	MA0029.1	8	15	4	3754	0.643252	1	Factors with multiple dispersed zinc fingers
MEF2A	MA0052.3	21	24	14	10124	0.00707973	1	Regulators of differentiation
MEF2B	MA0660.1	19	21	12	8538	0.0311946	1	Regulators of differentiation
MEF2C	MA0497.1	26	42	19	12471	0.136107	1	Regulators of differentiation
MEF2D	MA0773.1	22	25	15	11208	0.00126112	1	Regulators of differentiation
MEIS1	MA0498.2	0	0	0	121	0.781778	1	TALE-type homeo domain factors
MEIS2	MA0774.1	25	24	16	6068	0.0683086	1	TALE-type homeo domain factors
MEIS3	MA0775.1	25	24	16	6068	0.0683086	1	TALE-type homeo domain factors
MEOX1	MA0661.1	2	8	5	2530	0.207067	1	HOX-related factors
MEOX2	MA0706.1	5	11	8	3495	0.245374	1	HOX-related factors
MGA	MA0801.1	9	25	9	4510	0.491371	1	TBX6-related factors
Mitf	MA0620.1	8	11	5	3010	0.934946	1	bHLH-ZIP factors
mix-a	MA0621.1	11	22	6	5076	0.667588	1	Paired-related HD factors
MIXL1	MA0662.1	4	12	7	2817	0.428081	1	Paired-related HD factors
MLX	MA0663.1	6	7	4	2428	0.708423	1	bHLH-ZIP factors
Mlxip	MA0622.1	12	13	9	4382	0.501172	1	bHLH-ZIP factors
MLXIPL	MA0664.1	8	4	5	2363	0.211281	1	bHLH-ZIP factors
MNT	MA0825.1	12	9	4	3581	0.24179	1	bHLH-ZIP factors
MNX1	MA0707.1	8	12	6	4709	0.100494	1	HOX-related factors
MSC	MA0665.1	15	27	13	7426	0.469444	1	Tal-related factors
MSX1	MA0666.1	9	9	4	2500	0.791675	1	NK-related factors
MSX2	MA0708.1	5	10	4	2394	0.932757	1	NK-related factors
Msx3	MA0709.1	6	11	5	2797	0.90866	1	NK-related factors
MTF1	MA0863.1	12	15	7	3134	0.615041	1	More than 3 adjacent zinc finger factors
Myb	MA0100.2	21	37	11	8084	0.853451	1	Myb/SANT domain factors
MYBL1	MA0776.1	1	5	1	1105	0.609583	1	Myb/SANT domain factors
MYBL2	MA0777.1	2	6	3	1039	0.686991	1	Myb/SANT domain factors
Myc	MA0147.2	28	34	12	7614	0.49529	1	bHLH-ZIP factors
Mycn	MA0104.3	22	21	13	6243	0.345825	1	bHLH-ZIP factors
MYF6	MA0667.1	8	26	5	4928	0.202379	1	MyoD / ASC-related factors
Myod1	MA0499.1	49	76	23	15627	0.55795	1	MyoD / ASC-related factors
Myog	MA0500.1	50	75	29	15476	0.578655	1	MyoD / ASC-related factors
MZF1	MA0056.1	0	5	6	1255	0.0167586	1	More than 3 adjacent zinc finger factors
MZF1_var.2	MA0057.1	34	65	20	13395	0.73803	1	More than 3 adjacent zinc finger factors
NEUROD2	MA0668.1	5	9	4	1832	0.95863	1	Tal-related factors
Neurog1	MA0623.1	9	12	3	2493	0.769376	1	Tal-related factors
NEUROG2	MA0669.1	8	22	8	4136	0.599024	1	Tal-related factors
NFAT5	MA0606.1	23	46	26	11755	0.171124	1	NFAT-related factors
NFATC1	MA0624.1	8	29	18	8428	0.00541984	1	NFAT-related factors
NFATC2	MA0152.1	31	46	25	12763	0.418992	1	NFAT-related factors
NFATC3	MA0625.1	10	34	18	8626	0.0278435	1	NFAT-related factors
NFE2	MA0841.1	22	40	10	10775	0.062664	1	Jun-related factors
Nfe2l2	MA0150.2	34	42	18	10992	0.707046	1	Jun-related factors
NFIA	MA0670.1	10	21	12	6430	0.144195	1	Nuclear factor 1
NFIC::TLX1	MA0119.1	10	17	5	3304	0.905602	1	Nuclear factor 1/NK-related factors
NFIL3	MA0025.1	12	11	7	4067	0.428917	1	C/EBP-related
NFIX	MA0671.1	13	33	10	6733	0.514558	1	Nuclear factor 1
NFKB1	MA0105.4	58	96	28	17237	0.0605177	1	NF-kappaB-related factors
NFKB2	MA0778.1	36	70	22	11719	0.0783581	1	NF-kappaB-related factors
NFYA	MA0060.2	11	24	7	4513	0.782596	1	Heteromeric CCAAT-binding factors
NFYB	MA0502.1	12	14	3	3500	0.520763	1	Heteromeric CCAAT-binding factors
NHLH1	MA0048.2	33	39	17	8155	0.133643	1	Tal-related factors
NKX2-3	MA0672.1	9	24	12	5775	0.317373	1	NK-related factors
Nkx2-5	MA0063.1	18	44	18	9526	0.414264	1	NK-related factors
Nkx2-5_var.2	MA0503.1	45	63	25	13662	0.674291	1	NK-related factors
NKX2-8	MA0673.1	8	22	6	4801	0.427008	1	NK-related factors
Nkx3-1	MA0124.2	10	16	9	4565	0.667972	1	NK-related factors
NKX3-2	MA0122.2	9	12	9	4073	0.393053	1	NK-related factors
NKX6-1	MA0674.1	6	13	10	3556	0.226808	1	NK-related factors
NKX6-2	MA0675.1	6	12	10	3586	0.18874	1	NK-related factors
Nobox	MA0125.1	7	14	9	3699	0.494147	1	Paired-related HD factors
NOTO	MA0710.1	3	10	6	2493	0.400519	1	NK-related factors
Npas2	MA0626.1	10	11	5	3674	0.573398	1	PAS domain factors
NR1H2::RXRA	MA0115.1	4	4	2	1839	0.42815	1	Thyroid hormone receptor-related factors (NR1)/RXR-related receptors (NR2)
Nr1h3::Rxra	MA0494.1	25	36	18	9027	0.865103	1	Thyroid hormone receptor-related factors (NR1)/RXR-related receptors (NR2)
NR2C2	MA0504.1	69	86	36	18901	0.128621	1	RXR-related receptors (NR2)
Nr2e1	MA0676.1	26	28	18	7826	0.311672	1	RXR-related receptors (NR2)
Nr2e3	MA0164.1	7	19	6	3341	0.626062	1	RXR-related receptors (NR2)
NR2F1	MA0017.2	34	54	18	11301	0.875949	1	RXR-related receptors (NR2)
Nr2f6	MA0677.1	42	56	23	11842	0.374723	1	RXR-related receptors (NR2)
Nr2f6_var.2	MA0728.1	41	80	25	15586	0.568492	1	RXR-related receptors (NR2)
NR3C1	MA0113.3	17	33	11	5773	0.510109	1	Steroid hormone receptors (NR3)
NR3C2	MA0727.1	18	37	12	6900	0.699938	1	Steroid hormone receptors (NR3)
NR4A2	MA0160.1	27	54	19	10306	0.640907	1	NGFI-B-related receptors (NR4)
Nr5a2	MA0505.1	34	52	24	13067	0.852141	1	FTZ-F1-related receptors (NR5)
NRF1	MA0506.1	23	30	5	4321	0.000686829	1	Jun-related factors
NRL	MA0842.1	20	32	17	6365	0.260479	1	Maf-related factors
OLIG1	MA0826.1	6	15	5	2337	0.506504	1	Tal-related factors
OLIG2	MA0678.1	5	11	4	2146	0.93921	1	Tal-related factors
OLIG3	MA0827.1	8	12	5	2604	0.98432	1	Tal-related factors
ONECUT1	MA0679.1	11	15	9	5305	0.264723	1	HD-CUT factors
ONECUT2	MA0756.1	13	18	8	5424	0.578006	1	HD-CUT factors
ONECUT3	MA0757.1	20	28	12	8870	0.18767	1	HD-CUT factors
OTX1	MA0711.1	2	10	2	1598	0.430973	1	Paired-related HD factors
OTX2	MA0712.1	9	22	7	3279	0.247968	1	Paired-related HD factors
PAX1	MA0779.1	17	28	4	4994	0.185708	1	Paired domain only
Pax2	MA0067.1	10	13	8	4025	0.668809	1	Paired domain only
PAX3	MA0780.1	5	11	3	2589	0.761277	1	Paired plus homeo domain
PAX4	MA0068.2	0	6	5	1176	0.0537516	1	Paired plus homeo domain
PAX5	MA0014.2	26	32	14	6938	0.42978	1	Paired domain only
Pax6	MA0069.1	9	13	6	3201	0.987569	1	Paired plus homeo domain
PAX7	MA0680.1	5	12	3	2975	0.51791	1	Paired plus homeo domain
PAX9	MA0781.1	32	62	16	10680	0.163398	1	Paired domain only
PBX1	MA0070.1	6	12	6	3640	0.440597	1	TALE-type homeo domain factors
PDX1	MA0132.2	4	10	7	2901	0.332788	1	HOX-related factors
PHOX2A	MA0713.1	15	19	8	4905	0.914527	1	Paired-related HD factors
Phox2b	MA0681.1	12	17	8	4562	0.911526	1	Paired-related HD factors
Pitx1	MA0682.1	6	18	8	3944	0.489799	1	Paired-related HD factors
PITX3	MA0714.1	6	17	6	3170	0.671287	1	Paired-related HD factors
PKNOX1	MA0782.1	33	58	23	11820	0.822888	1	TALE-type homeo domain factors
PKNOX2	MA0783.1	41	54	22	11206	0.271235	1	TALE-type homeo domain factors
POU1F1	MA0784.1	11	32	15	7398	0.19075	1	POU domain factors
POU2F1	MA0785.1	10	26	15	6076	0.198193	1	POU domain factors
POU2F2	MA0507.1	15	38	19	8856	0.206044	1	POU domain factors
Pou2f3	MA0627.1	10	30	9	5683	0.377165	1	POU domain factors
POU3F1	MA0786.1	10	30	13	7271	0.155267	1	POU domain factors
POU3F2	MA0787.1	10	29	18	6969	0.0588294	1	POU domain factors
POU3F3	MA0788.1	15	29	13	7717	0.446037	1	POU domain factors
POU3F4	MA0789.1	8	21	11	5119	0.347548	1	POU domain factors
POU4F1	MA0790.1	15	23	7	8851	0.00195507	1	POU domain factors
POU4F2	MA0683.1	21	28	16	9440	0.136799	1	POU domain factors
POU4F3	MA0791.1	17	23	7	8208	0.0188355	1	POU domain factors
Pou5f1::Sox2	MA0142.1	19	44	16	9515	0.544223	1	POU domain factors/SOX-related factors
POU5F1B	MA0792.1	9	21	12	5186	0.368629	1	POU domain factors
POU6F1	MA0628.1	6	7	6	1548	0.192198	1	POU domain factors
POU6F2	MA0793.1	3	17	14	3991	0.00444036	1	POU domain factors
PPARG	MA0066.1	18	44	14	5876	0.00305019	1	Thyroid hormone receptor-related factors (NR1)
Pparg::Rxra	MA0065.2	62	103	48	19734	0.0265409	1	Thyroid hormone receptor-related factors (NR1)/RXR-related receptors (NR2)
PRDM1	MA0508.1	43	108	30	24882	0.00327645	1	More than 3 adjacent zinc finger factors
PROP1	MA0715.1	15	22	6	5849	0.500589	1	Paired-related HD factors
PROX1	MA0794.1	7	15	4	2894	0.870538	1	HD-PROS factors
PRRX1	MA0716.1	3	12	7	2354	0.240121	1	Paired-related HD factors
Prrx2	MA0075.2	4	13	8	2768	0.271093	1	Paired-related HD factors
RARA	MA0729.1	49	91	38	21927	0.455788	1	Thyroid hormone receptor-related factors (NR1)
RARA_var.2	MA0730.1	38	79	19	13374	0.0603077	1	Thyroid hormone receptor-related factors (NR1)
RARA::RXRA	MA0159.1	28	40	17	8035	0.442359	1	Thyroid hormone receptor-related factors (NR1)/RXR-related receptors (NR2)
Rarb	MA0857.1	75	121	47	26211	0.951627	1	Thyroid hormone receptor-related factors (NR1)
Rarb_var.2	MA0858.1	41	83	24	16936	0.458665	1	Thyroid hormone receptor-related factors (NR1)
Rarg	MA0859.1	69	134	51	28431	0.62144	1	Thyroid hormone receptor-related factors (NR1)
Rarg_var.2	MA0860.1	99	199	71	40466	0.293688	1	Thyroid hormone receptor-related factors (NR1)
RAX	MA0718.1	6	7	7	2658	0.332839	1	Paired-related HD factors
RAX2	MA0717.1	3	12	7	2354	0.240121	1	Paired-related HD factors
REL	MA0101.1	37	59	24	12880	0.971215	1	NF-kappaB-related factors
RELA	MA0107.1	27	58	16	12021	0.431856	1	NF-kappaB-related factors
REST	MA0138.2	60	79	22	16415	0.0819172	1	Factors with multiple dispersed zinc fingers
Rfx1	MA0509.1	24	26	13	7260	0.584013	1	RFX-related factors
RFX2	MA0600.2	10	18	6	3291	0.824513	1	RFX-related factors
RFX3	MA0798.1	10	15	5	2930	0.85997	1	RFX-related factors
RFX4	MA0799.1	11	16	4	3013	0.644467	1	RFX-related factors
RFX5	MA0510.2	10	19	9	3798	0.757928	1	RFX-related factors
Rhox11	MA0629.1	3	14	3	3470	0.103891	1	Paired-related HD factors
RHOXF1	MA0719.1	9	30	10	5363	0.26152	1	Paired-related HD factors
RORA	MA0071.1	19	42	16	7984	0.570136	1	Thyroid hormone receptor-related factors (NR1)
RORA_var.2	MA0072.1	4	10	8	2613	0.231258	1	Thyroid hormone receptor-related factors (NR1)
RUNX1	MA0002.2	27	53	19	11760	0.787367	1	Runt-related factors
RUNX2	MA0511.2	6	19	2	3094	0.176141	1	Runt-related factors
RUNX3	MA0684.1	12	26	2	4268	0.084731	1	Runt-related factors
Rxra	MA0512.2	52	72	29	16195	0.758518	1	RXR-related receptors (NR2)
RXRA::VDR	MA0074.1	1	9	4	1066	0.0546344	1	RXR-related receptors (NR2)/Thyroid hormone receptor-related factors (NR1)
RXRB	MA0855.1	68	101	45	22628	0.731637	1	RXR-related receptors (NR2)
RXRG	MA0856.1	66	94	44	22345	0.749104	1	RXR-related receptors (NR2)
SCRT1	MA0743.1	24	29	23	9031	0.0912328	1	More than 3 adjacent zinc finger factors
SCRT2	MA0744.1	18	31	15	9044	0.259672	1	More than 3 adjacent zinc finger factors
SHOX	MA0630.1	3	12	7	2438	0.259252	1	Paired-related HD factors
Shox2	MA0720.1	3	14	7	2776	0.253338	1	Paired-related HD factors
Six3	MA0631.1	7	17	1	2904	0.193893	1	HD-SINE factors
SMAD2::SMAD3::SMAD4	MA0513.1	45	74	26	14872	0.713509	1	SMAD factors
SMAD3	MA0795.1	8	13	3	2468	0.806159	1	SMAD factors
SNAI2	MA0745.1	30	49	21	10250	0.812963	1	More than 3 adjacent zinc finger factors
Sox1	MA0870.1	21	47	17	10393	0.53766	1	SOX-related factors
SOX10	MA0442.1	0	1	1	965	0.142266	1	SOX-related factors
Sox11	MA0869.1	28	57	24	16246	0.0181	1	SOX-related factors
Sox17	MA0078.1	6	24	10	5071	0.181927	1	SOX-related factors
Sox2	MA0143.3	16	32	8	7444	0.403716	1	SOX-related factors
SOX21	MA0866.1	23	42	26	12767	0.0341992	1	SOX-related factors
Sox3	MA0514.1	32	66	22	14502	0.552724	1	SOX-related factors
SOX4	MA0867.1	42	97	47	26523	0.00073407	1	SOX-related factors
Sox6	MA0515.1	19	36	7	9534	0.0374213	1	SOX-related factors
SOX8	MA0868.1	44	78	47	21681	0.0192331	1	SOX-related factors
SOX9	MA0077.1	8	10	4	4148	0.0999038	1	SOX-related factors
SPDEF	MA0686.1	6	17	2	2437	0.184752	1	Ets-related factors
SPI1	MA0080.4	44	92	41	22957	0.0747186	1	Ets-related factors
SPIB	MA0081.1	21	53	9	10767	0.0416524	1	Ets-related factors
SPIC	MA0687.1	16	41	18	9953	0.167209	1	Ets-related factors
Spz1	MA0111.1	21	37	10	7980	0.751176	1	medline 11165476
SREBF1	MA0595.1	12	27	22	6576	0.00720912	1	bHLH-ZIP factors
Srebf1_var.2	MA0829.1	4	13	5	2752	0.619232	1	bHLH-ZIP factors
SREBF2	MA0596.1	18	30	21	7175	0.106376	1	bHLH-ZIP factors
SREBF2_var.2	MA0828.1	5	12	6	2860	0.724348	1	bHLH-ZIP factors
SRF	MA0083.3	9	16	10	4280	0.567444	1	Responders to external signals (SRF/RLM1)
SRY	MA0084.1	14	28	18	8921	0.0394069	1	SOX-related factors
STAT1	MA0137.3	32	54	21	12250	0.990613	1	STAT factors
STAT1::STAT2	MA0517.1	51	110	37	24912	0.135384	1	STAT factors
STAT3	MA0144.2	42	59	28	14836	0.827691	1	STAT factors
Stat4	MA0518.1	34	54	17	11865	0.86944	1	STAT factors
Stat5a::Stat5b	MA0519.1	25	69	16	12223	0.0528019	1	STAT factors
Stat6	MA0520.1	16	40	21	11348	0.0214212	1	STAT factors
T	MA0009.2	7	6	9	3033	0.0724416	1	Brachyury-related factors
TAL1::TCF3	MA0091.1	23	39	13	7926	0.912169	1	Tal-related factors/E2A-related factors
TBP	MA0108.2	7	14	3	3341	0.586177	1	TATA-binding
TBR1	MA0802.1	19	28	15	5648	0.283653	1	TBrain-related factors
TBX1	MA0805.1	11	31	13	5175	0.144974	1	TBX1-related factors
TBX15	MA0803.1	11	32	14	5315	0.0928047	1	TBX1-related factors
TBX19	MA0804.1	6	7	8	2864	0.183194	1	Brachyury-related factors
TBX2	MA0688.1	11	29	12	5454	0.430519	1	TBX2-related factors
TBX20	MA0689.1	13	36	13	6179	0.242122	1	TBX1-related factors
TBX21	MA0690.1	13	40	14	5579	0.00847747	1	TBrain-related factors
TBX4	MA0806.1	11	32	14	5315	0.0928047	1	TBX2-related factors
TBX5	MA0807.1	13	40	10	6757	0.145	1	TBX2-related factors
Tcf12	MA0521.1	48	70	27	14976	0.734883	1	E2A-related factors
Tcf21	MA0832.1	15	27	8	5976	0.873595	1	Tal-related factors
TCF3	MA0522.2	37	62	25	10881	0.0591023	1	E2A-related factors
TCF4	MA0830.1	34	67	30	11694	0.0278393	1	E2A-related factors
Tcf7	MA0769.1	23	46	18	11406	0.412133	1	TCF-7-related factors
TCF7L2	MA0523.1	20	44	8	10095	0.0594186	1	TCF-7-related factors
Tcfl5	MA0632.1	5	4	1	891	0.425208	1	PAS domain factors
TEAD1	MA0090.2	11	27	5	5580	0.288651	1	TEF-1-related factors
TEAD3	MA0808.1	10	24	4	4741	0.340491	1	TEF-1-related factors
TEAD4	MA0809.1	13	29	7	6343	0.445408	1	TEF-1-related factors
TEF	MA0843.1	3	8	1	2068	0.34753	1	TEF-1-related factors
TFAP2C_var.2	MA0814.1	34	28	11	6545	0.00300877	1	AP-2
TFAP4	MA0691.1	22	27	14	7485	0.731641	1	bHLH-ZIP factors
TFCP2	MA0145.3	4	7	2	1842	0.838952	1	CP2-related factors
TFE3	MA0831.1	13	7	5	3617	0.101208	1	bHLH-ZIP factors
TFEB	MA0692.1	11	8	5	4108	0.0964636	1	bHLH-ZIP factors
TFEC	MA0871.1	9	6	7	3989	0.0449441	1	bHLH-ZIP factors
TGIF1	MA0796.1	39	67	26	13149	0.585201	1	TALE-type homeo domain factors
TGIF2	MA0797.1	23	25	12	6111	0.471118	1	TALE-type homeo domain factors
THAP1	MA0597.1	30	33	14	8312	0.469317	1	THAP-related factors
TP53	MA0106.3	10	17	7	4275	0.919204	1	p53-related factors
TP63	MA0525.2	22	30	14	9286	0.285495	1	p53-related factors
TP73	MA0861.1	12	11	7	3659	0.556224	1	p53-related factors
Twist2	MA0633.1	15	26	16	4446	0.00982152	1	Tal-related factors
UNCX	MA0721.1	4	6	7	1700	0.113948	1	Paired-related HD factors
USF1	MA0093.2	21	21	12	7625	0.178036	1	bHLH-ZIP factors
USF2	MA0526.1	25	27	17	8961	0.243931	1	bHLH-ZIP factors
VAX1	MA0722.1	7	12	2	3667	0.167848	1	NK-related factors
VAX2	MA0723.1	3	7	1	2427	0.122252	1	NK-related factors
Vdr	MA0693.1	27	68	26	11685	0.055703	1	Thyroid hormone receptor-related factors (NR1)
VENTX	MA0724.1	1	10	5	2055	0.20985	1	NK-related factors
VSX1	MA0725.1	1	10	6	2412	0.129901	1	Paired-related HD factors
VSX2	MA0726.1	1	10	6	2412	0.129901	1	Paired-related HD factors
XBP1	MA0844.1	7	10	4	2388	0.996233	1	XBP-1-related factors
YY1	MA0095.2	14	30	11	6963	0.669765	1	More than 3 adjacent zinc finger factors
YY2	MA0748.1	3	9	0	1431	0.278999	1	More than 3 adjacent zinc finger factors
ZBED1	MA0749.1	3	4	2	1076	0.987857	1	BED zinc finger factors
ZBTB18	MA0698.1	25	53	23	11386	0.571877	1	More than 3 adjacent zinc finger factors
ZBTB33	MA0527.1	6	5	2	1415	0.693945	1	Other factors with up to three adjacent zinc fingers
ZBTB7A	MA0750.1	26	19	2	4917	0.000837801	1	More than 3 adjacent zinc finger factors
ZBTB7B	MA0694.1	21	21	7	5102	0.277732	1	More than 3 adjacent zinc finger factors
ZEB1	MA0103.2	26	59	25	9727	0.0208295	1	HD-ZF factors
ZIC4	MA0751.1	45	54	17	9588	0.00120391	1	More than 3 adjacent zinc finger factors
ZNF143	MA0088.2	42	72	18	13011	0.137558	1	More than 3 adjacent zinc finger factors
ZNF263	MA0528.1	278	541	186	104284	0.0027383	1	More than 3 adjacent zinc finger factors
ZNF354C	MA0130.1	0	0	2	459	0.162552	1	More than 3 adjacent zinc finger factors
ZNF410	MA0752.1	39	65	31	15776	0.729306	1	More than 3 adjacent zinc finger factors
Znf423	MA0116.1	24	40	7	6193	0.0205228	1	Factors with multiple dispersed zinc fingers
